# Supplementary material for: Aminopeptidase Expression in Multiple Myeloma Associates with Disease Progression and Sensitivity to Melflufen
Source: PubMed Central journal article supplement (PMC8036322; doi:10.3390/cancers13071527), 2021-03-26
Supplement: cancers-13-01527-s001.pdf [file cancers-13-01527-s001.pdf]

# Aminopeptidase Expression in Multiple Myeloma Associates with Disease Progression and Sensitivity to Melflufen

Juho J. Miettinen, Romika Kumari, Gunnhildur Asta Traustadottir, Maiju-Emilia Huppunen, Philipp Sergeev, Muntasir M. Majumder, Alexander Schepsky, Thorarinn Gudjonsson, Juha Lievonen, Despina Bazou, Paul Dowling, Peter O`Gorman, Ana Slipicevic, Pekka Anttila, Raija Silvennoinen, Nina N. Nupponen, Fredrik Lehmann, and Caroline A. Heckman

## TABLE OF CONTENTS

### Supplementary figures

- Figure S1.** Drug plate layout and drug concentrations used in the flow cytometry-based drug sensitivity testing.
- Figure S2.** Flow cytometry gating strategy used in drug sensitivity testing.
- Figure S3.** Aminopeptidase gene family genes showed similar expression in both the CoMMpass and FIMM datasets.
- Figure S4.** Correlation of aminopeptidase genes *LAP3*, *ERAP2*, *METAP2*, *TPP2*, *DPP7*, *ERAP1*, *LTA4H*, *LNPEP* (Group I) expression with myeloma patient cytogenetics and age in the FIMM dataset.
- Figure S5.** Aminopeptidase gene expression positively correlates with aminopeptidase protein expression, especially for *LAP3*, *BLMH*, *DPP3*, *DPP7*, *RNPEP*, and *ERAP2* aminopeptidases.
- Figure S6.** CoMMpass dataset confirms that aminopeptidase genes are differentially expressed in NDMM vs. RRMM.
- Figure S7.** Correlation of aminopeptidase genes differentially expressed between RRMM and NDMM with myeloma patient cytogenetics and ISS stage in the FIMM dataset.
- Figure S8.** Prognostic significance of three aminopeptidase genes *XPNPEP1*, *RNPEP*, and *DPP3* expression in NDMM and RRMM samples separately in the FIMM dataset.
- Figure S9.** Prognostic significance of aminopeptidase gene expression in the CoMMpass dataset.
- Figure S10.** Somatic mutation predictions for aminopeptidase genes in the FIMM dataset samples ( $n = 169$ ).
- Figure S11.** Somatic mutation predictions for aminopeptidase genes in CoMMpass dataset ( $n = 1164$ ).

- Figure S12.** Aminopeptidase gene CNVs in FIMM dataset MM samples ( $n = 169$ ).
- Figure S13.** Aminopeptidase gene CNVs in CoMMpass dataset ( $n = 1044$ ).
- Figure S14.** *Ex vivo* sensitivity of MM CD138+CD38+ plasma cells to melflufen, melphalan, bortezomib, selinexor, and 4-HC.
- Figure S15.** *Ex vivo* sensitivity of MM CD138+CD38+ plasma cells to melflufen in 10 MM patients having also gene expression data available from MM CD138+ plasma cells.
- Figure S16.** Correlation of the 39 aminopeptidase genes expression with melflufen sensitivity in bone marrow plasma cells in 10 myeloma patient samples.
- Figure S17.** Correlation of drug sensitivity (EC50 values) to selinexor versus melflufen, melphalan and bortezomib in CD138+CD38+ plasma cells from MM patient samples.
- Figure S18.** Cytogenetics and melflufen sensitivity in CD138+CD38+ plasma cells from MM patient samples.
- Figure S19.** Aminopeptidase ANPEP can hydrolyze melflufen to melphalan and 4-F-Phe-OEt.

### Supplementary tables

- Table S1.** FIMM dataset patient sample characteristics and sample analysis information.
- Table S2.** List of the 39 annotated aminopeptidase genes in the human genome utilizing the Ensembl and NCBI databases and further confirming the molecular function (gene ontology) of the identified genes.
- Table S3.** List of compounds used in the experiments.
- Table S4.** Aminopeptidases used in the hydrolysis assay and their incubation buffers.
- Table S5.** log<sub>2</sub>(RPKM) expression values for 39 aminopeptidases genes and 17 housekeeping genes in MM patient samples in the FIMM dataset ( $n = 122$ ).
- Table S6.** LC-MS/MS-based proteomics label free quantitation intensity values for 17 aminopeptidase proteins in CD138+ cells isolated from MM patient samples in the FIMM dataset ( $n = 23$ ).
- Table S7.** Statistical overview of genes identified as prognostic markers ( $p \leq 0.05$ ) in the FIMM dataset ( $n = 122$ ).

- Table S8.** Aminopeptidase gene somatic mutation frequencies from MM patient samples in the FIMM dataset ( $n = 169$ ).
- Table S9.** Aminopeptidase gene copy number variation scores from MM patient samples in the FIMM dataset ( $n=169$ ).
- Table S10.** Summary of live cells, and CD138+CD38+ plasma cells present in the BM-MNC samples after 72 h incubation in DMSO (control).
- Table S11.** Melflufen, melphalan, selinexor, bortezomib, and 4-HC EC50 values from 15 MM patient sample CD138+CD38+ plasma cells with sample disease stage indicated
- Table S12.** Mean  $\log_2(\text{RPKM})$  values for the 39 aminopeptidase genes in melflufen high sensitivity ( $n = 5$ ) and low sensitivity ( $n = 5$ ) myeloma samples.

## SUPPLEMENTARY FIGURES

|   | 1               | 2               | 3          | 4               | 5    | 6                | 7               | 8               | 9          | 10              | 11   | 12               |
|---|-----------------|-----------------|------------|-----------------|------|------------------|-----------------|-----------------|------------|-----------------|------|------------------|
| A | 3               | 0.1             | 0.1        | 0.1             |      | 0.1              | 3               | 0.1             | 0.1        | 0.1             |      | 0.1              |
| B | 10              | 1               | 1          | 1               |      | 1                | 10              | 1               | 1          | 1               |      | 1                |
| C | 30              | 10              | 10         | 10              |      | 3                | 30              | 10              | 10         | 10              |      | 3                |
| D | DMSO            | DMSO            | BzCl       | DMSO            | DMSO | DMSO             | DMSO            | DMSO            | BzCl       | DMSO            | DMSO | DMSO             |
| E | 100             | 100             | 100        | 100             |      | 10               | 100             | 100             | 100        | 100             |      | 10               |
| F | 300             | 1000            | 300        | 1000            |      | 30               | 300             | 1000            | 300        | 1000            |      | 30               |
| G | 1000            | 10000           | 1000       | 10000           |      | 100              | 1000            | 10000           | 1000       | 10000           |      | 100              |
| H | 3000            | 100000          | 10000      | 100000          |      | 1000             | 3000            | 100000          | 10000      | 100000          |      | 1000             |
|   | Selinexor (1/2) | Melflufen (1/2) | 4-HC (1/2) | Melphalan (1/2) |      | Bortezomib (1/2) | Selinexor (2/2) | Melflufen (2/2) | 4-HC (2/2) | Melphalan (2/2) |      | Bortezomib (2/2) |

**Supplementary Figure S1. Drug plate layout and drug concentrations used in the flow cytometry-based drug sensitivity testing.** The drug plate (96-wells) contains five different drugs (selinexor, melflufen, 4-HC, melphalan, bortezomib) at seven different concentrations (nM concentrations are shown), lighter blue indicating lower concentrations and darker blue higher concentrations. Duplicate columns for each drug are indicated on the plate as (1/2) & (2/2). The plate contains 10 negative control wells (0.2% DMSO) marked in green and 2 positive control wells (10 000 nM BzCl) marked in red.

DMSO: dimethyl sulfoxide; BzCl: benzoyl chloride; 4-HC: 4-hydroperoxycyclophosphamide

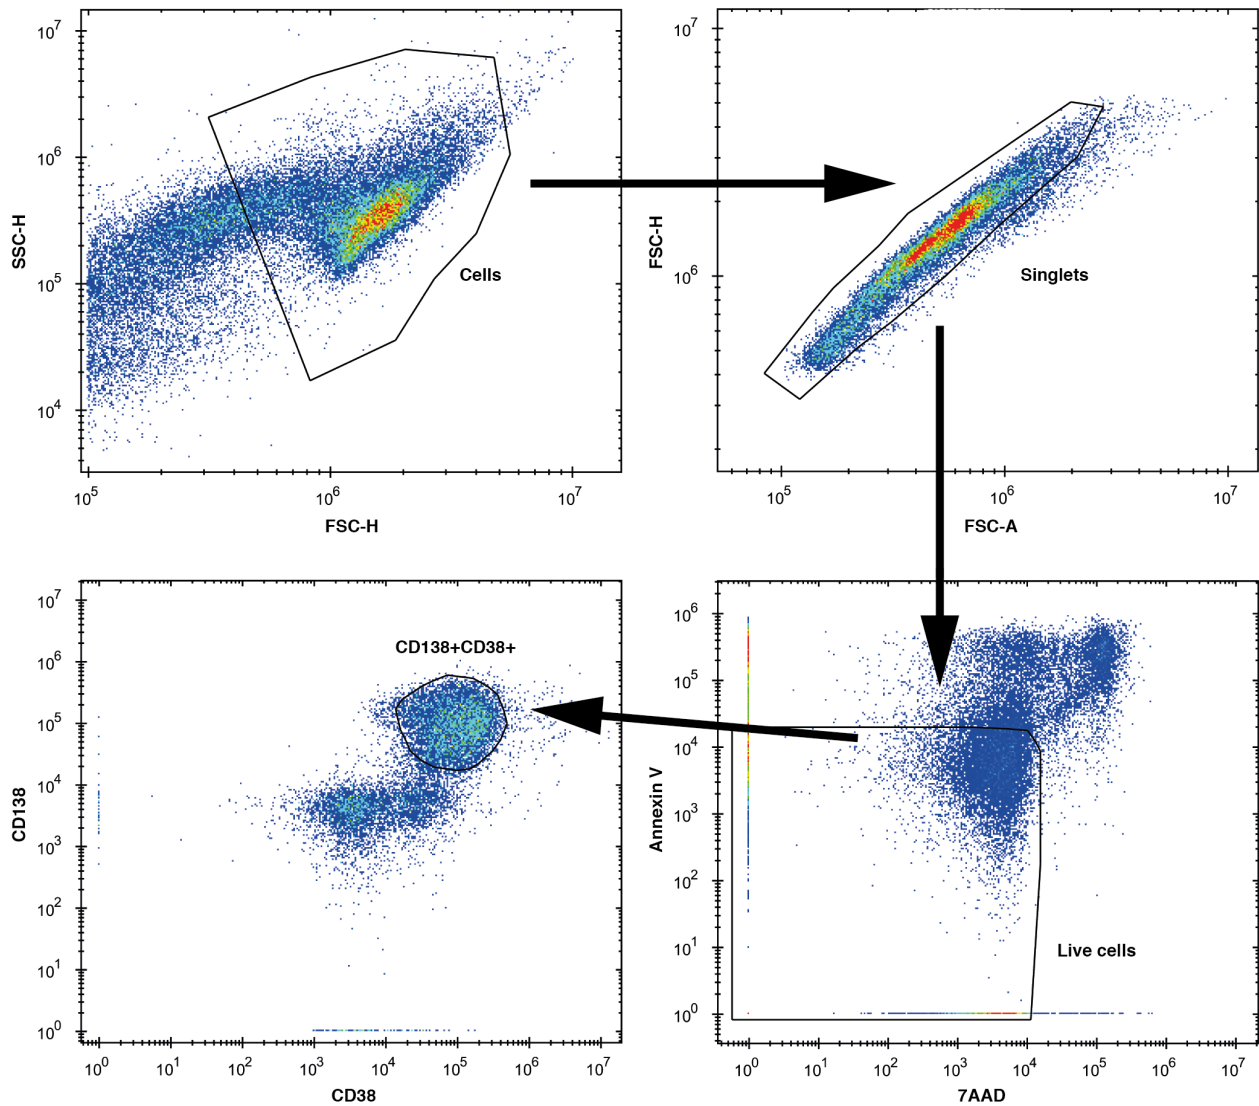

**Supplementary Figure S2. Flow cytometry gating strategy used in drug sensitivity testing.** Cells are first gated from all detected events. Singlet cells are gated from all cells. Live cells (Annexin V<sup>-</sup>, 7AAD<sup>-</sup>) are gated from singlet cells. CD138<sup>+</sup>CD38<sup>+</sup> plasma cells are gated from all live cells. Negative control DMSO well from sample MM128\_1 was used as an example for the gating strategy. 7-AAD: 7-amino-actinomycin D; DMSO: dimethyl sulfoxide; FSC-H: forward scatter height; FSC-A: forward scatter area; SSC-H: side scatter height.

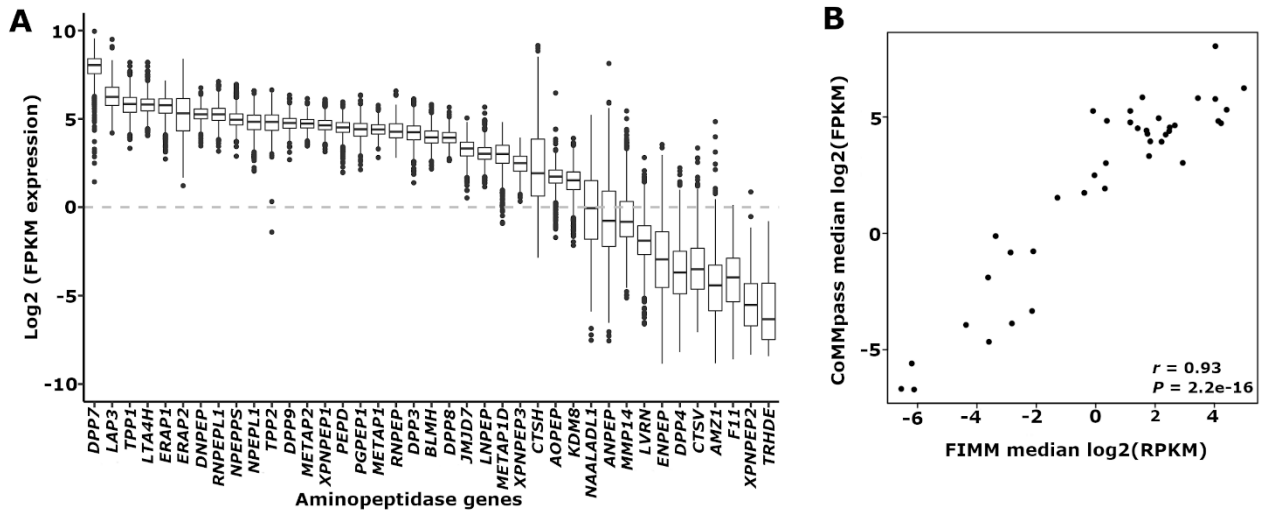

**Supplementary Figure S3. Aminopeptidase gene family genes showed similar expression in both the CoMMpass and FIMM datasets. (A)** Boxplots showing the expression of aminopeptidase genes in CoMMpass dataset ( $n = 892$ ). **(B)** Correlation of median aminopeptidase gene expression between the FIMM dataset and the CoMMpass dataset. Each dot represents a gene ( $n = 39$ ) ( $r = 0.93$ ,  $p = 2.2 \times 10^{-16}$ ).

FPKM: fragments per kilobase of transcript per million mapped reads; RPKM: reads per kilobase of transcript per million mapped reads

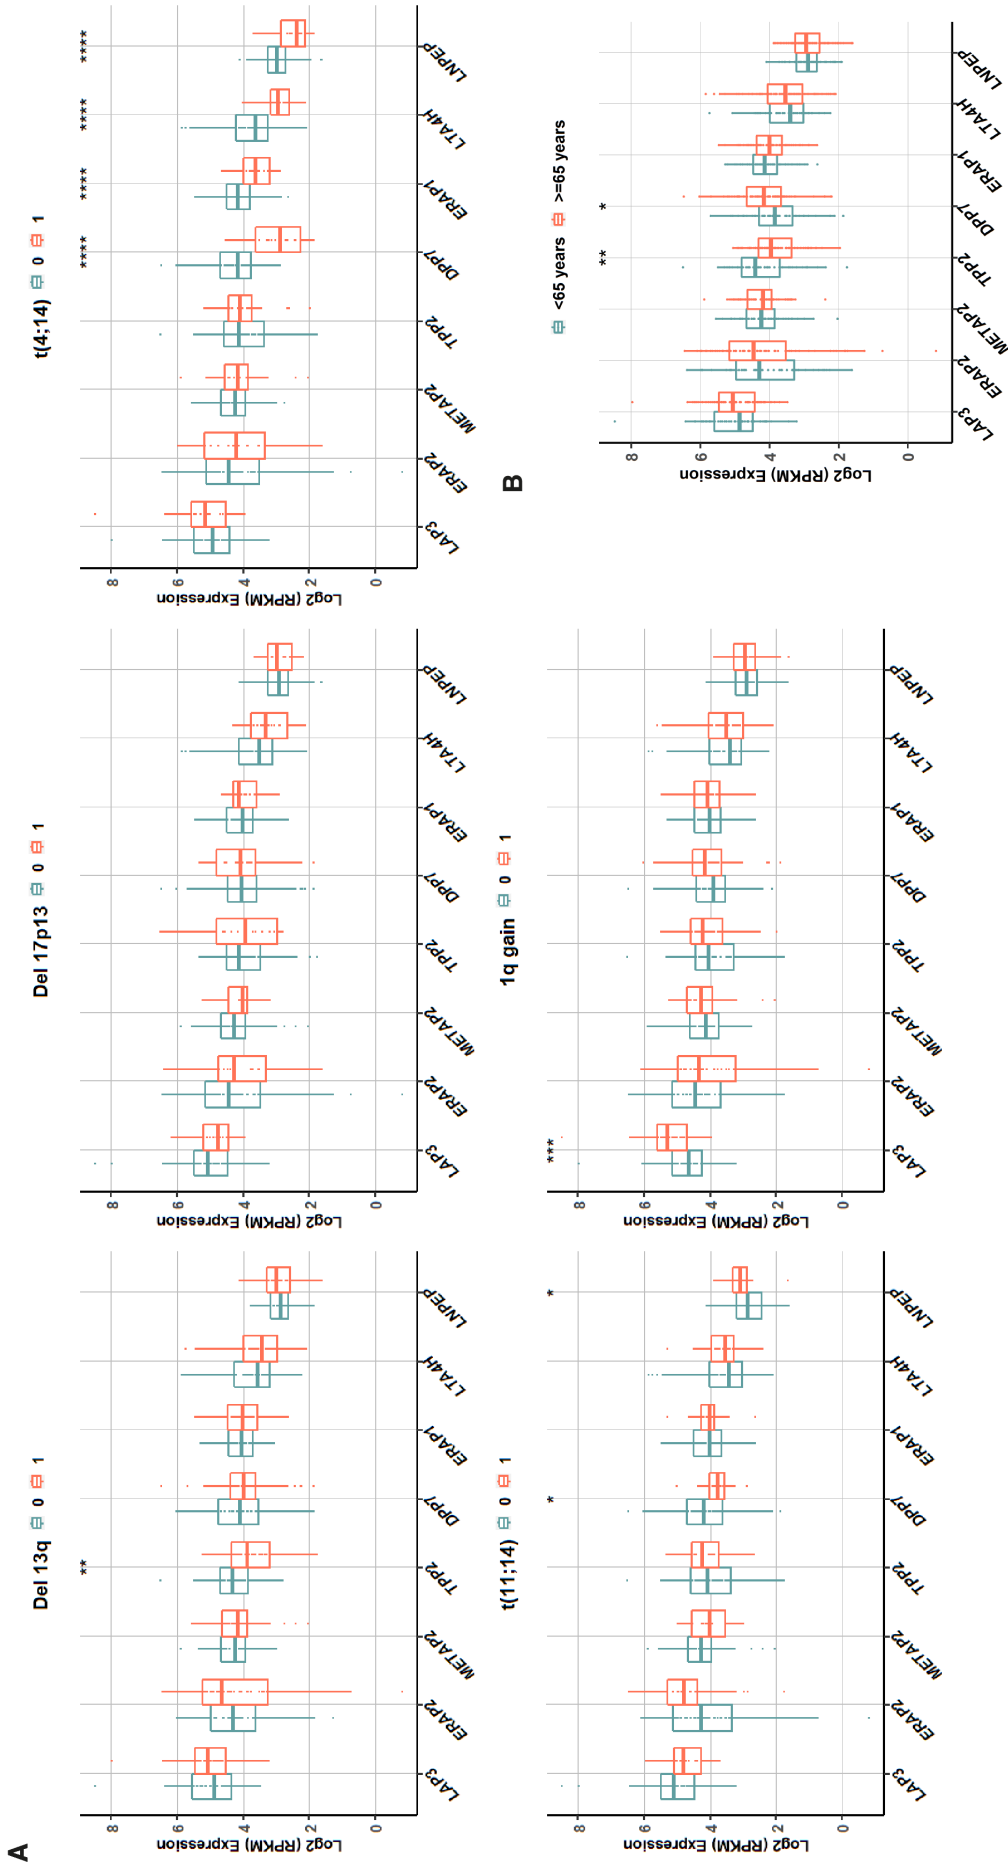

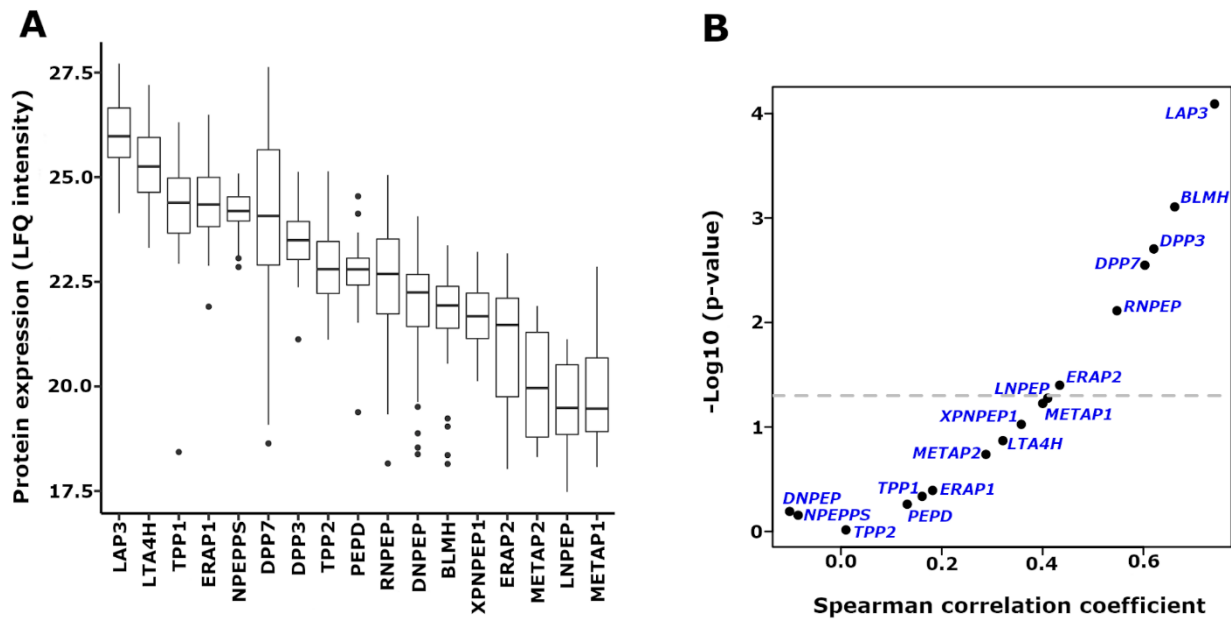

**Supplementary Figure S5. Aminopeptidase gene expression positively correlates with aminopeptidase protein expression, especially for LAP3, BLMH, DPP3, DPP7, RNPEP, and ERAP2 aminopeptidases.** (A) Aminopeptidase protein expression levels were measured using LC-MS/MS-based label-free quantitative proteomics from CD138+ cells enriched from 23 MM patient bone marrow aspirates. Peptides from 17 aminopeptidase proteins were detected by LC-MS/MS-based proteomics. Protein expression levels are indicated as LFQ intensity values. (B) Correlation of protein expression and gene expression levels for the 17 aminopeptidases. LC-MS/MS: liquid chromatography-tandem mass spectrometry; LFQ: label-free quantification; MM: multiple myeloma.



A

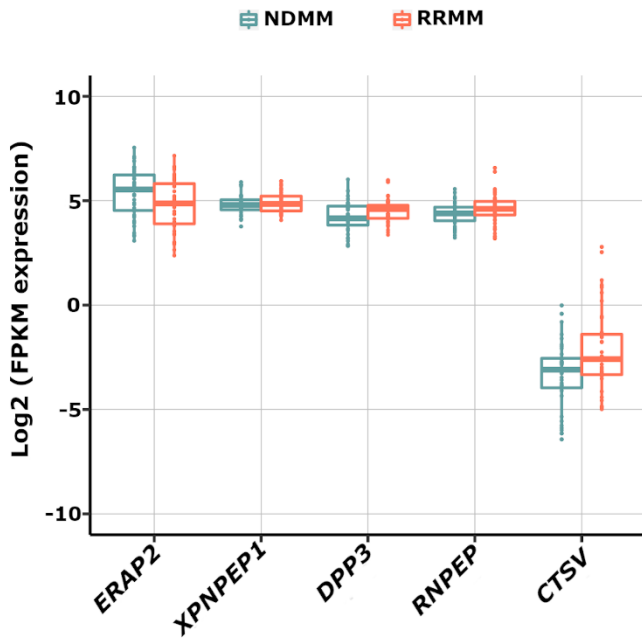

B

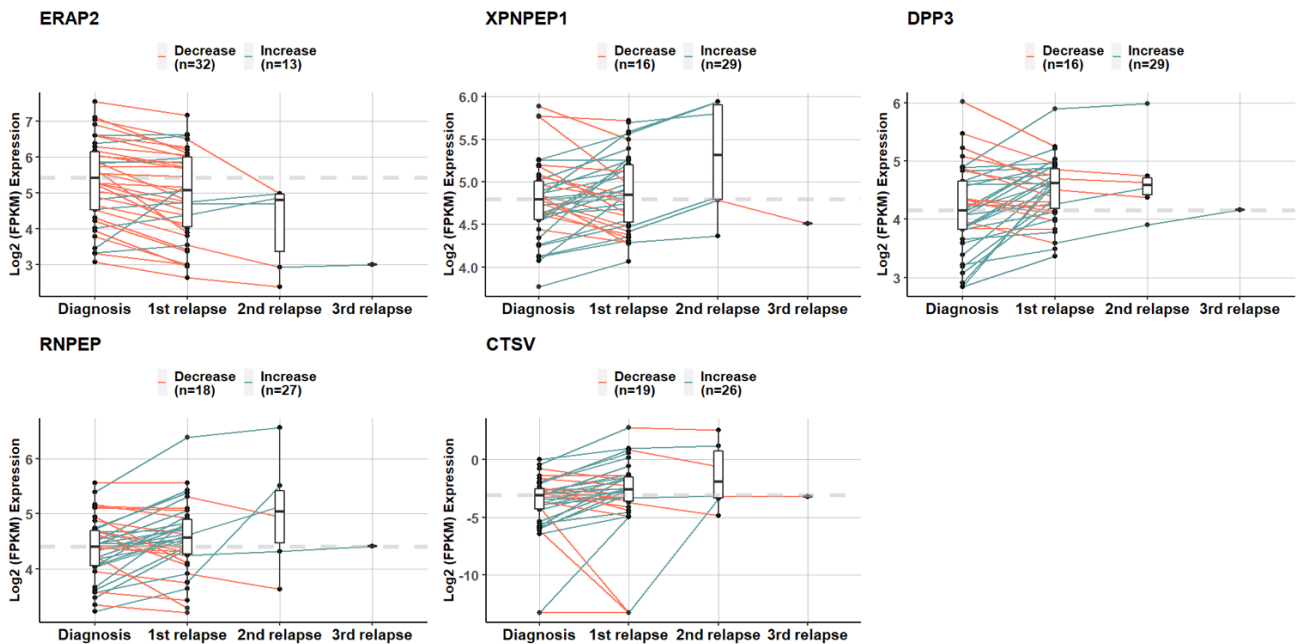

**Supplementary Figure S6. CoMMpass dataset confirms that aminopeptidase genes are differentially expressed in NDMM vs. RRMM.** The CoMMpass dataset differential gene expression analysis in NDMM *versus* RRMM samples was performed using paired samples (NDMM = 39, RRMM = 45). **(A)** The CoMMpass dataset differential gene expression analysis for the 5 aminopeptidase genes (*ERAP2*, *XPNPEP1*, *DPP3*, *RNPEP*, *CTSV*) confirming that they are differentially expressed in NDMM *versus* RRMM. **(B)** Description of the sequential changes in the gene expression of the 5 aminopeptidase genes (*ERAP2*, *XPNPEP1*, *DPP3*, *RNPEP*, *CTSV*) in the 39 myeloma patients in the CoMMpass dataset having paired samples. The relapse number indicated on the x-axis can be later than indicated. The x-axis provides gene expression data from RRMM in the order in which gene expression data is available from the patient. NDMM: newly diagnosed multiple myeloma; RRMM: relapsed/refractory multiple myeloma; FPKM: fragments per kilobase of transcript per million mapped reads

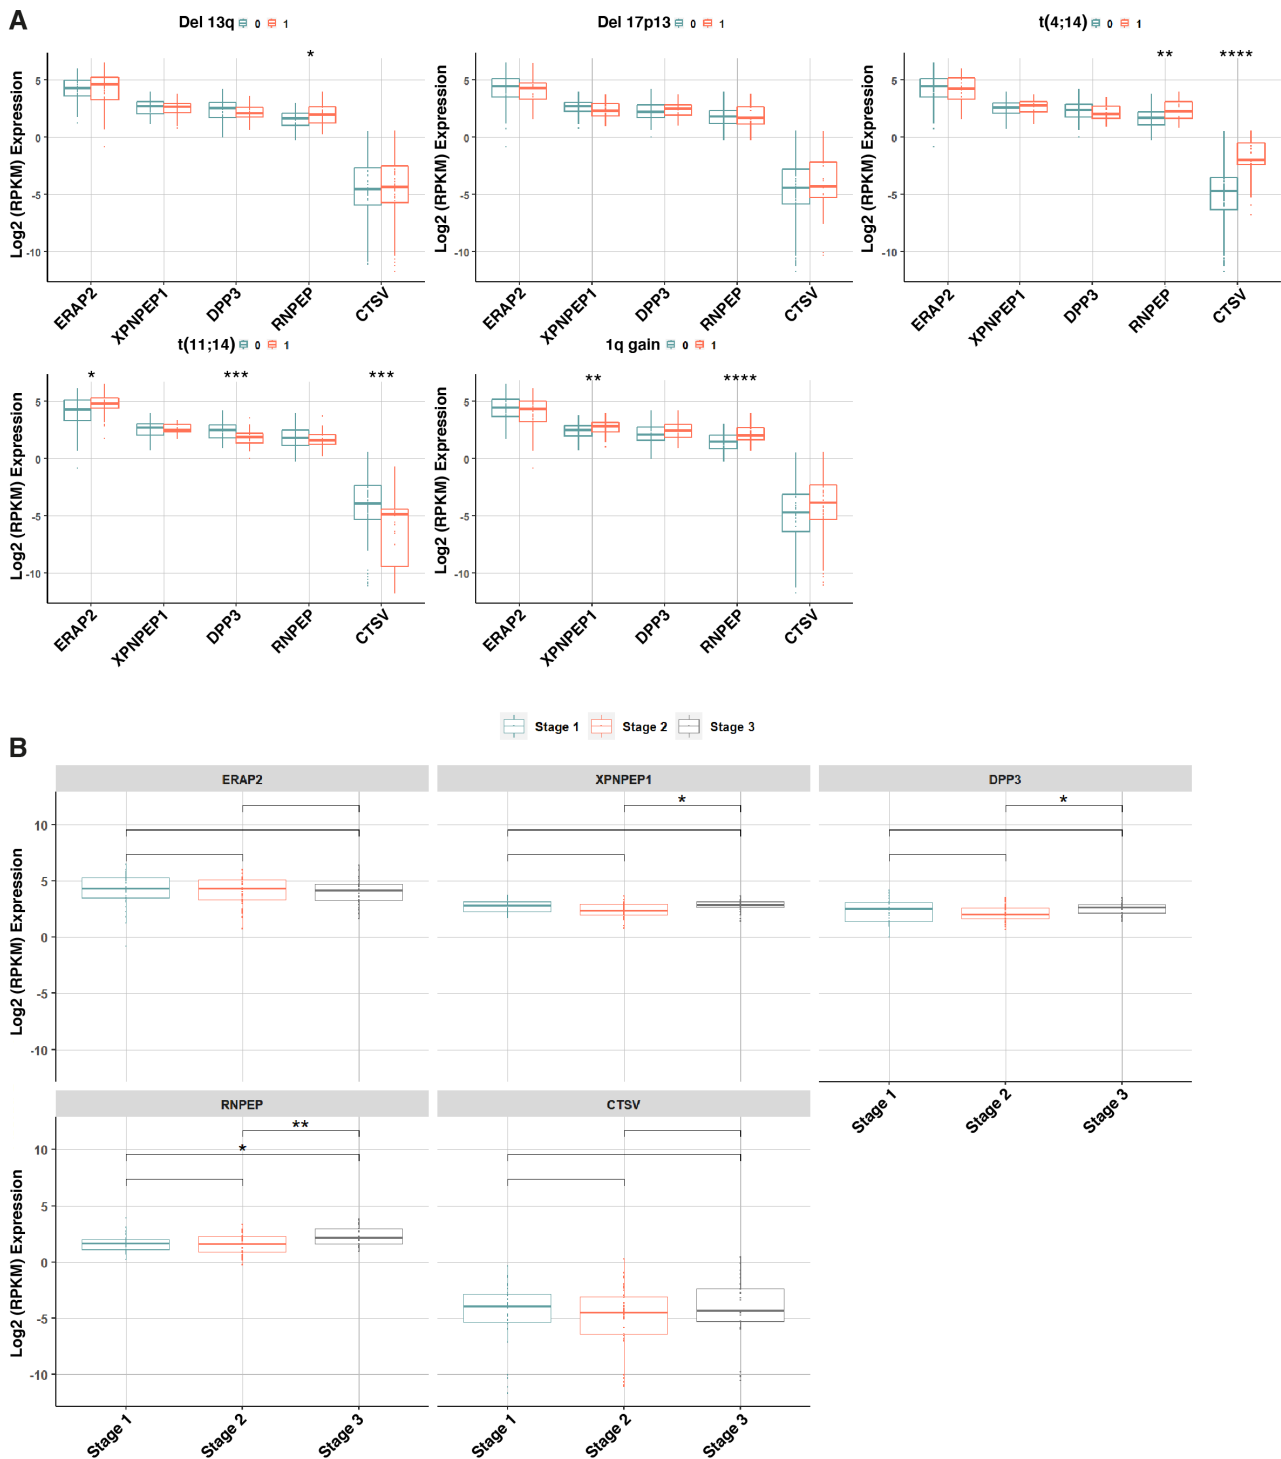

**Supplementary Figure S7. Correlation of aminopeptidase genes differentially expressed between RRMM and NDMM with myeloma patient cytogenetics and ISS stage in the FIMM dataset. (A)** Correlation of aminopeptidase gene (*ERAP2*, *XPNPEP1*, *DPP3*, *RNPEP*, *CTSV*) expression with cytogenetics (del 13q, del 17p, t(4;14), t(11;14), 1q gain). **(B)** Correlation of aminopeptidase gene expression (*ERAP2*, *XPNPEP1*, *DPP3*, *RNPEP*, *CTSV*) with International Staging System (ISS) stage. Statistical significance is indicated as \*adjusted  $p \leq 0.1$ ; \*\*adjusted  $p \leq 0.05$ ; \*\*\*adjusted  $p \leq 0.01$ ; \*\*\*\*adjusted  $p \leq 0.001$ .

0: patient doesn't have the cytogenetic abnormality; 1: patient has the cytogenetic abnormality; RPKM: reads per kilobase of transcript per million mapped reads

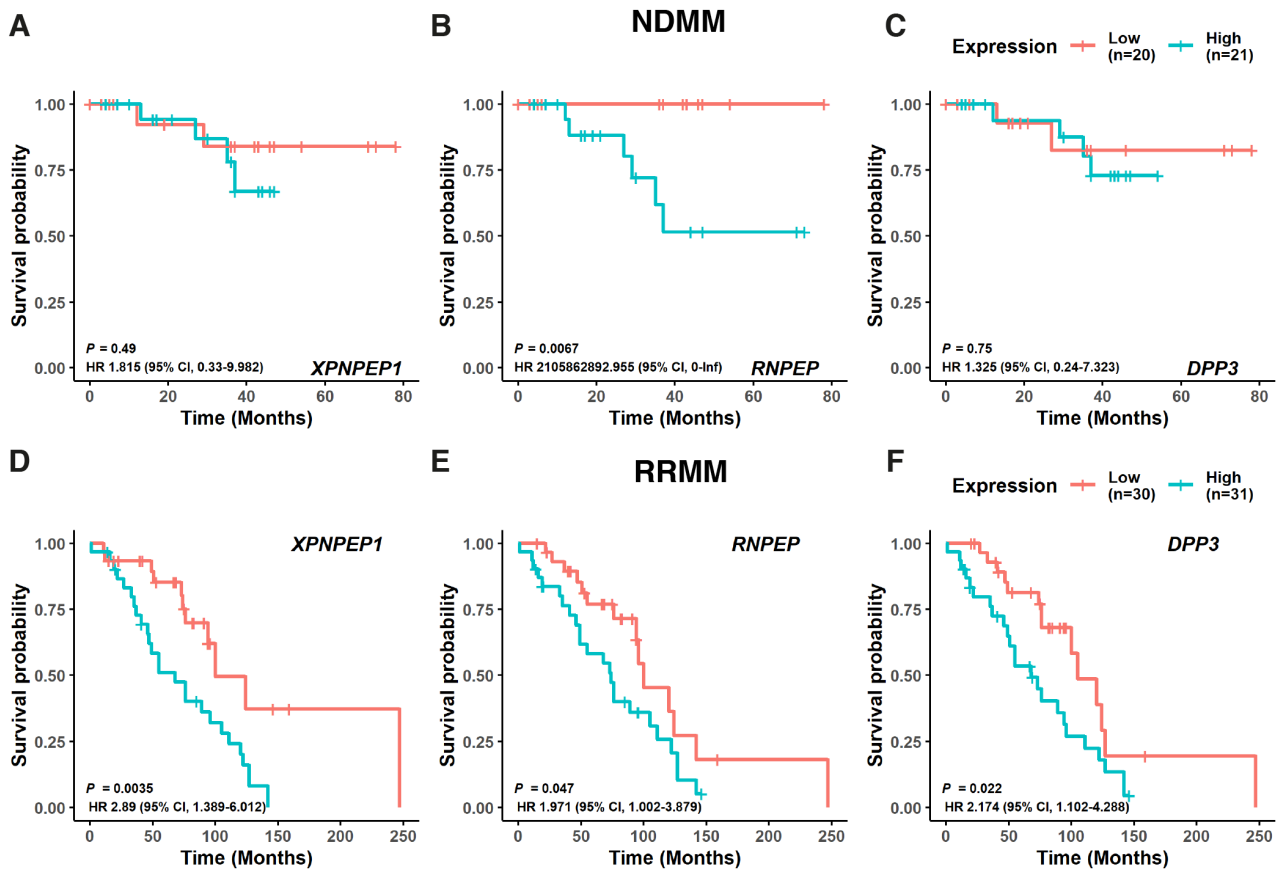

**Supplementary Figure S8. Prognostic significance of three aminopeptidase genes *XPNPEP1*, *RNPEP*, and *DPP3* expression in NDMM and RRMM samples separately in the FIMM dataset.** Analysis was performed using data from 41 NDMM and 61 RRMM patient samples the FIMM dataset. RRMM samples were selected on the basis of gene expression data availability from the first possible relapse sample available. (A-C) Survival curves drawn based on the FIMM dataset including only NDMM for the 3 aminopeptidase genes *XPNPEP1*, *RNPEP* and *DPP3* associated with poor prognosis in both the FIMM and CoMMpass datasets when both NDMM and RRMM samples were pooled together: (A) *XPNPEP1*, (B) *RNPEP* and (C) *DPP3*. (D-F) Survival curves drawn based on the FIMM dataset including only RRMM for the 3 aminopeptidase genes *XPNPEP1*, *RNPEP* and *DPP3* associated with poor prognosis ( $p \leq 0.05$ ) in both the FIMM and CoMMpass datasets when both NDMM and RRMM samples were pooled together: (D) *XPNPEP1*, (E) *RNPEP* and (F) *DPP3*. HR: hazard ratio; CI: confidence interval

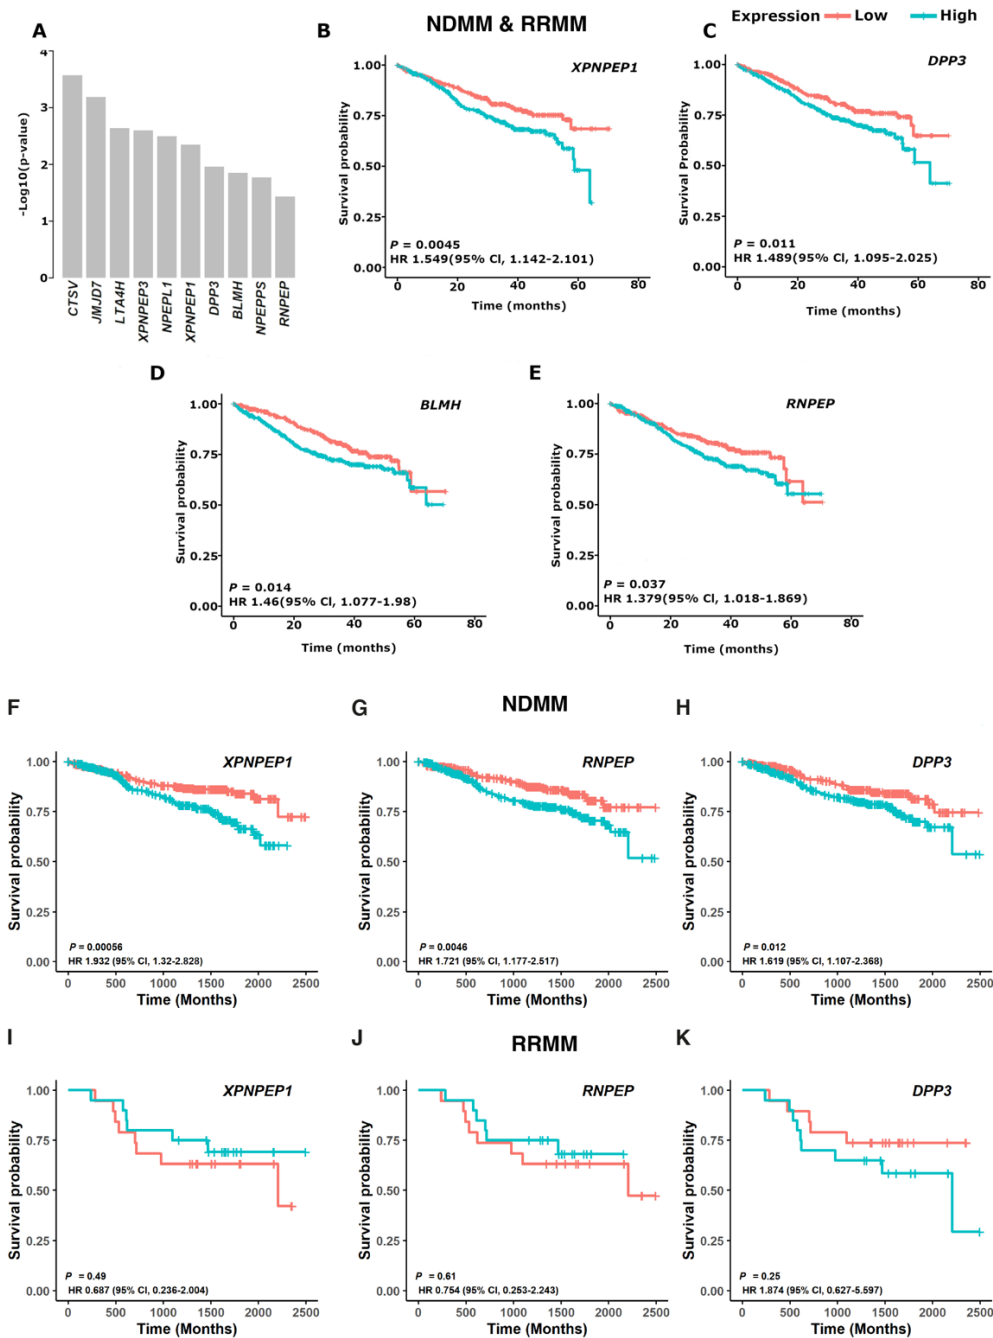

**Supplementary Figure S9. Prognostic significance of aminopeptidase gene expression in the CoMMpass dataset.** Analysis was performed using data from 768 NDMM patient samples in the CoMMpass dataset. **(A)**  $p$ -value distribution of the aminopeptidase genes associated with poor prognosis ( $p < 0.05$ ) in the CoMMpass dataset. **(B-E)** Survival curves drawn based on the CoMMpass dataset including both NDMM and RRMM samples for the 4 aminopeptidase genes associated with poor prognosis ( $p \leq 0.05$ ) in both the FIMM and CoMMpass datasets: **(B)** *XPNPEP1*, **(C)** *DPP3*, **(D)** *BLMH* and **(E)** *RNPEP*. **(F-H)** Survival curves drawn based on the CoMMpass dataset including only NDMM for the 3 aminopeptidase genes *XPNPEP1*, *RNPEP* and *DPP3* associated with poor prognosis ( $p \leq 0.05$ ) in both the FIMM and CoMMpass datasets when both NDMM and RRMM samples were pooled together: **(F)** *XPNPEP1*, **(G)** *RNPEP* and **(H)** *DPP3*. **(I-K)** Survival curves drawn based on the CoMMpass dataset including only RRMM for the 3 aminopeptidase genes *XPNPEP1*, *RNPEP* and *DPP3* associated with poor prognosis in both the FIMM and CoMMpass datasets: **(I)** *XPNPEP1*, **(J)** *RNPEP* and **(K)** *DPP3*. HR: hazard ratio; CI: confidence interval

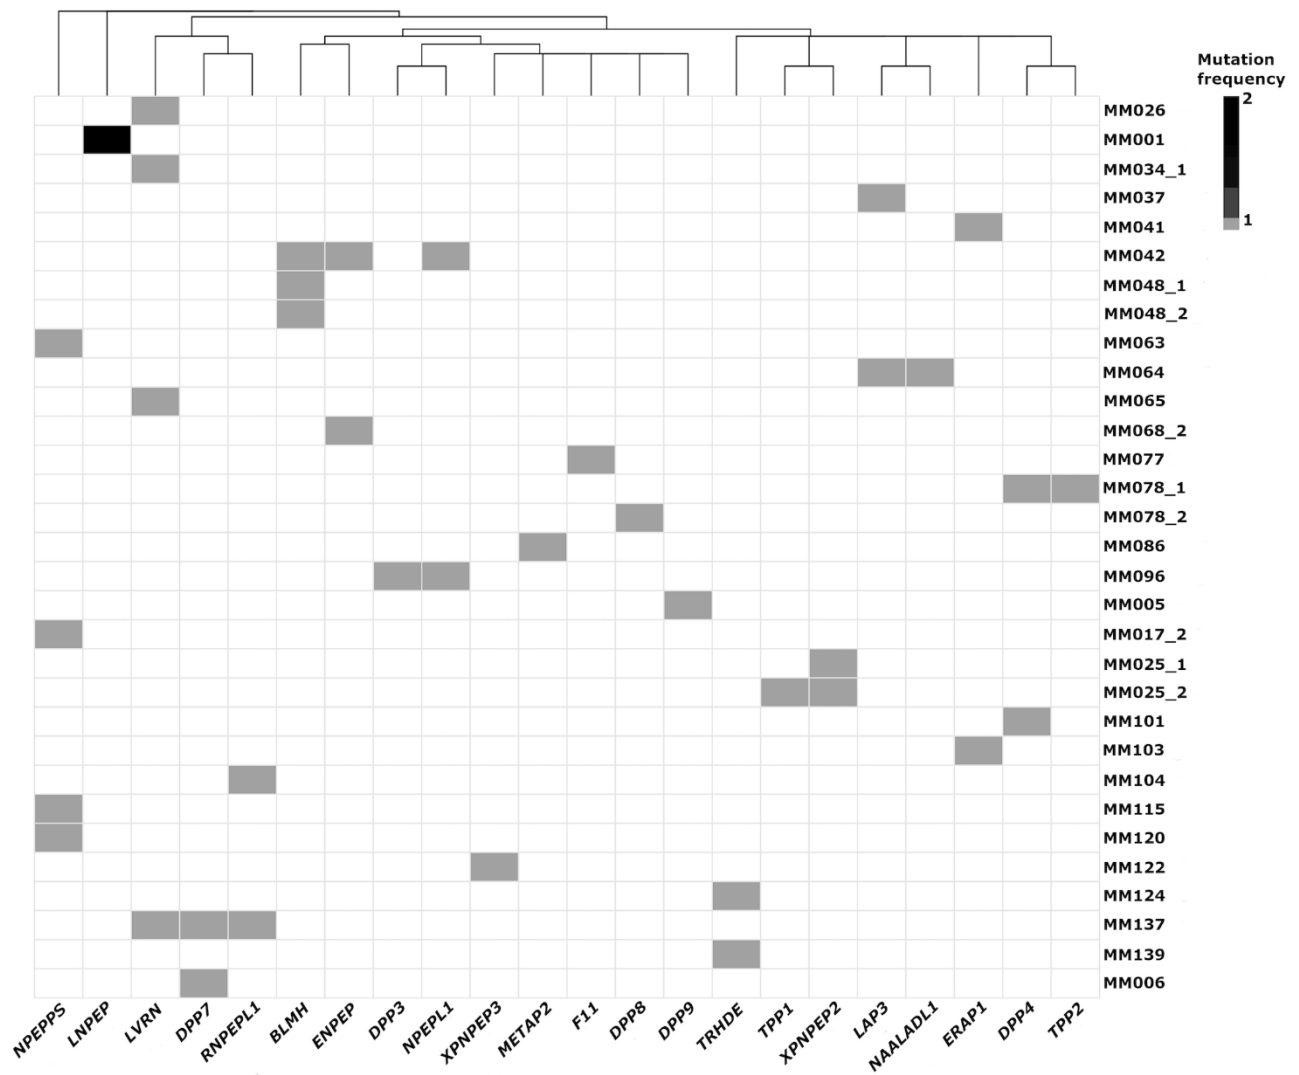

**Supplementary Figure S10. Somatic mutation predictions for aminopeptidase genes in the FIMM dataset samples ( $n = 169$ ).** Somatic mutations are rare in this gene family with all genes having  $< 2.3\%$  predicted mutations. Samples ( $n = 31$ ) having one or more predicted somatic mutations in the 39 aminopeptidase genes are shown in the figure. Only those aminopeptidase genes ( $n = 22$ ) predicted to have somatic mutations in the dataset are shown.

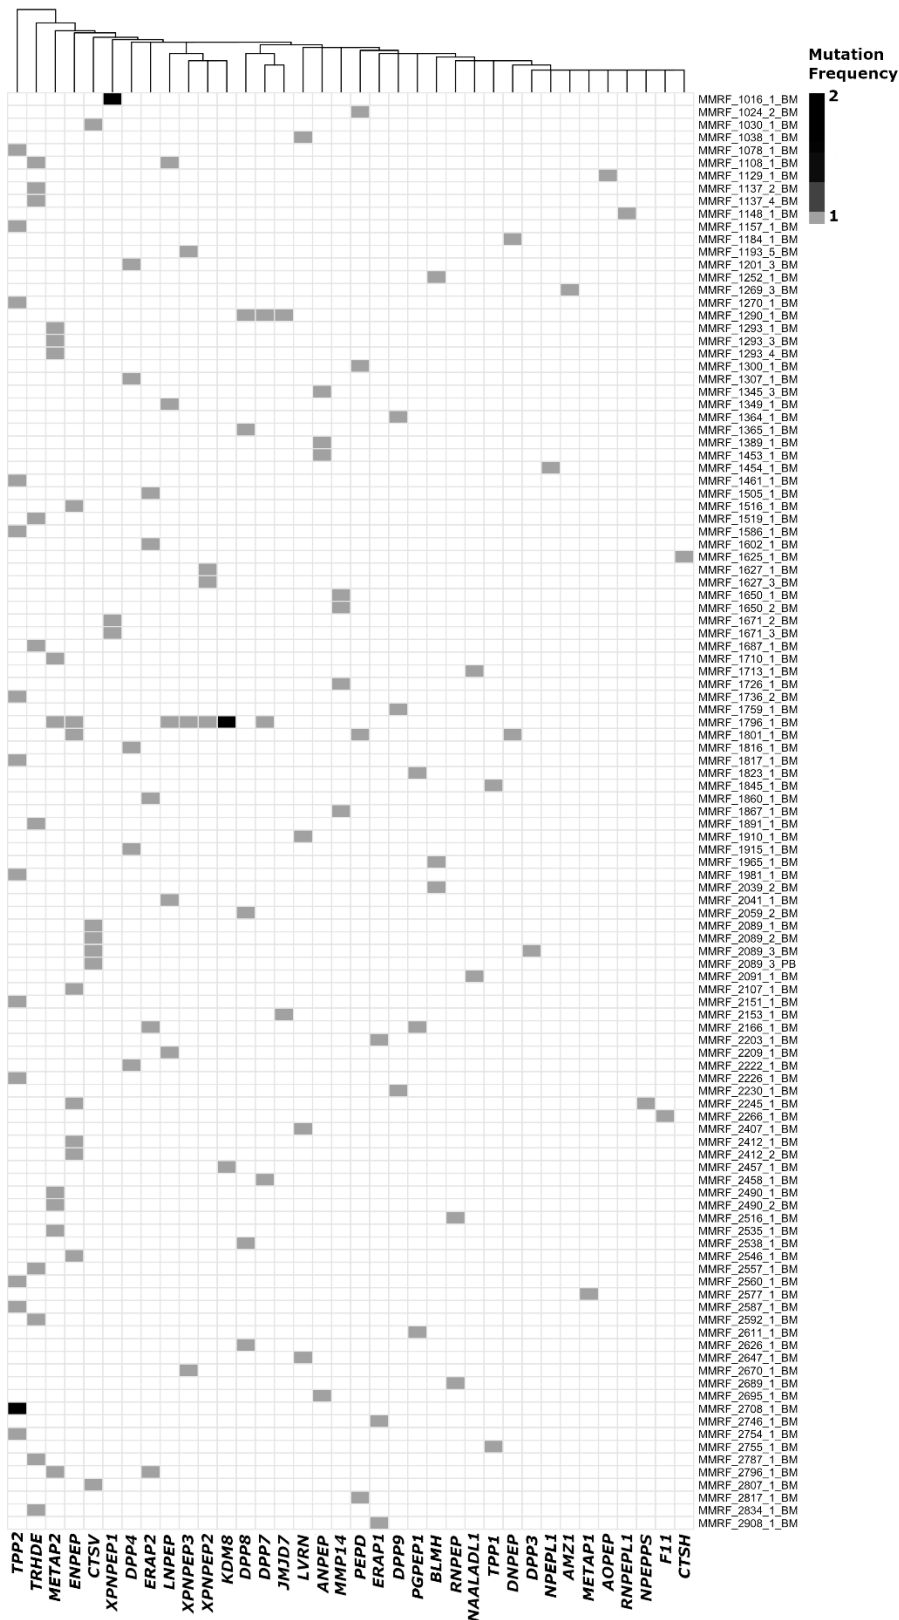

**Supplementary Figure S11. Somatic mutation predictions for aminopeptidase genes in CoMMpass dataset ( $n = 1164$ ).** Somatic mutations are rare in this gene family with all genes having  $< 1.2\%$  predicted mutations. Samples ( $n = 113$ ) having one or more predicted somatic mutations in the 39 aminopeptidase genes are shown in the figure. Only those aminopeptidase genes ( $n = 36$ ) predicted to have somatic mutations in the dataset are shown.

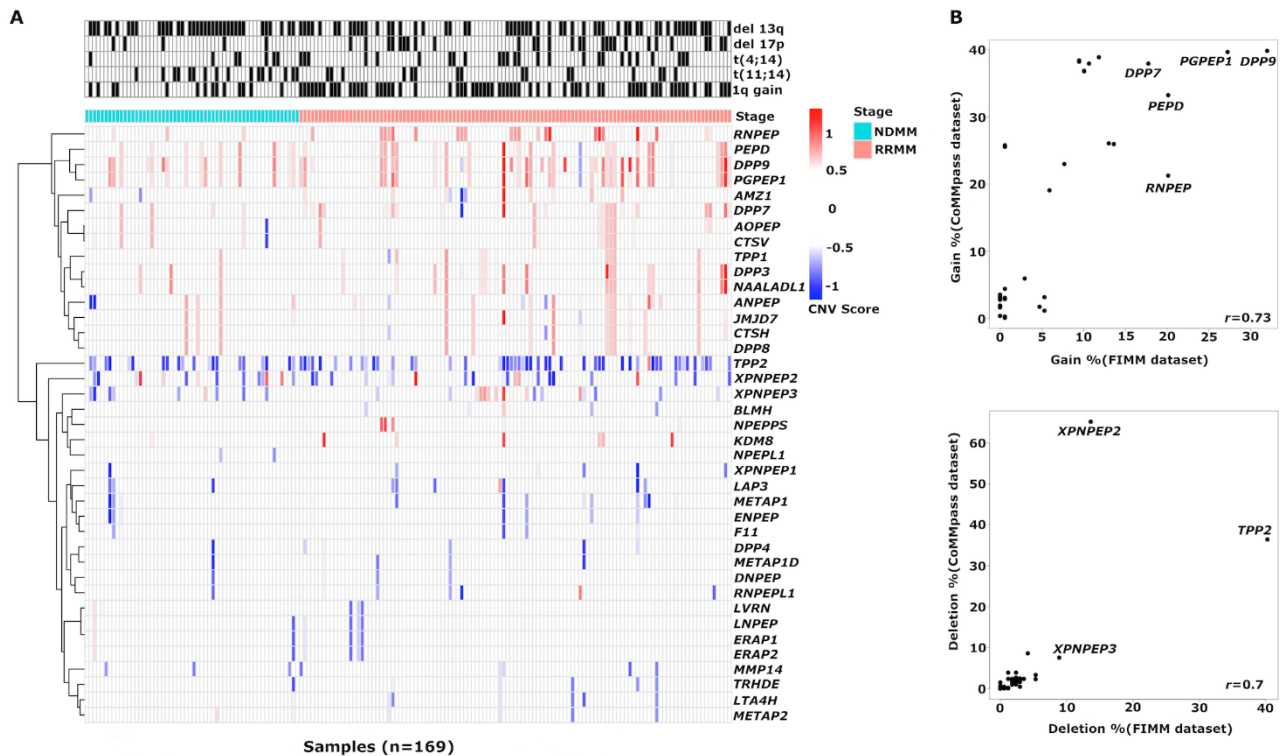

**Supplementary Figure S12. Amino peptidase gene CNVs in FIMM dataset MM samples ( $n = 169$ ).** (A) Heatmap showing the copy number variations in 39 amino peptidase genes from the FIMM dataset of 169 MM samples (NDMM ( $n = 56$ ), RRMM ( $n = 113$ )). Genes *DPP9*, *PGPEP1*, *RNPEP*, *PEPD* and *DPP7* were found to have a gain in  $> 15\%$  of the samples, and genes *TPP2* and *XPNPEP2* were found to have a deletion in  $> 10\%$  of samples. Sample cytogenetics (del 13q, del 17p, t(4;14), t(11;14), 1q gain) are indicated above the heatmap. Disease stage is also indicated (NDMM in cyan, with samples on the left; RRMM in pink, with samples on the right). (B) Amino peptidase gene CNV results were further validated in CoMMpass dataset, where % gain in FIMM and CoMMpass dataset had correlation coefficient of 0.75 and % deletion had 0.69 correlation coefficient. MM: multiple myeloma; NDMM: newly diagnosed multiple myeloma; RRMM: relapsed/refractory multiple myeloma; CNV: copy number variation

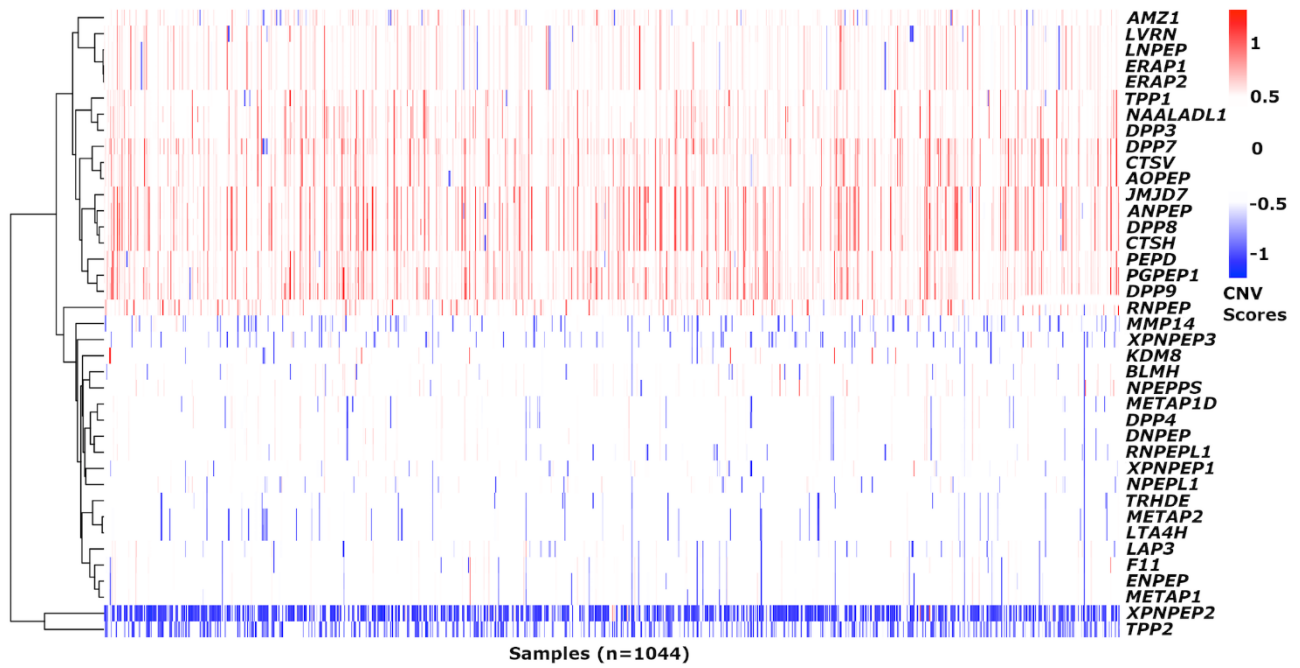

**Supplementary Figure S13. Aminopeptidase gene CNVs in CoMMpass dataset ( $n = 1044$ ).**  
 CNV: copy number variation



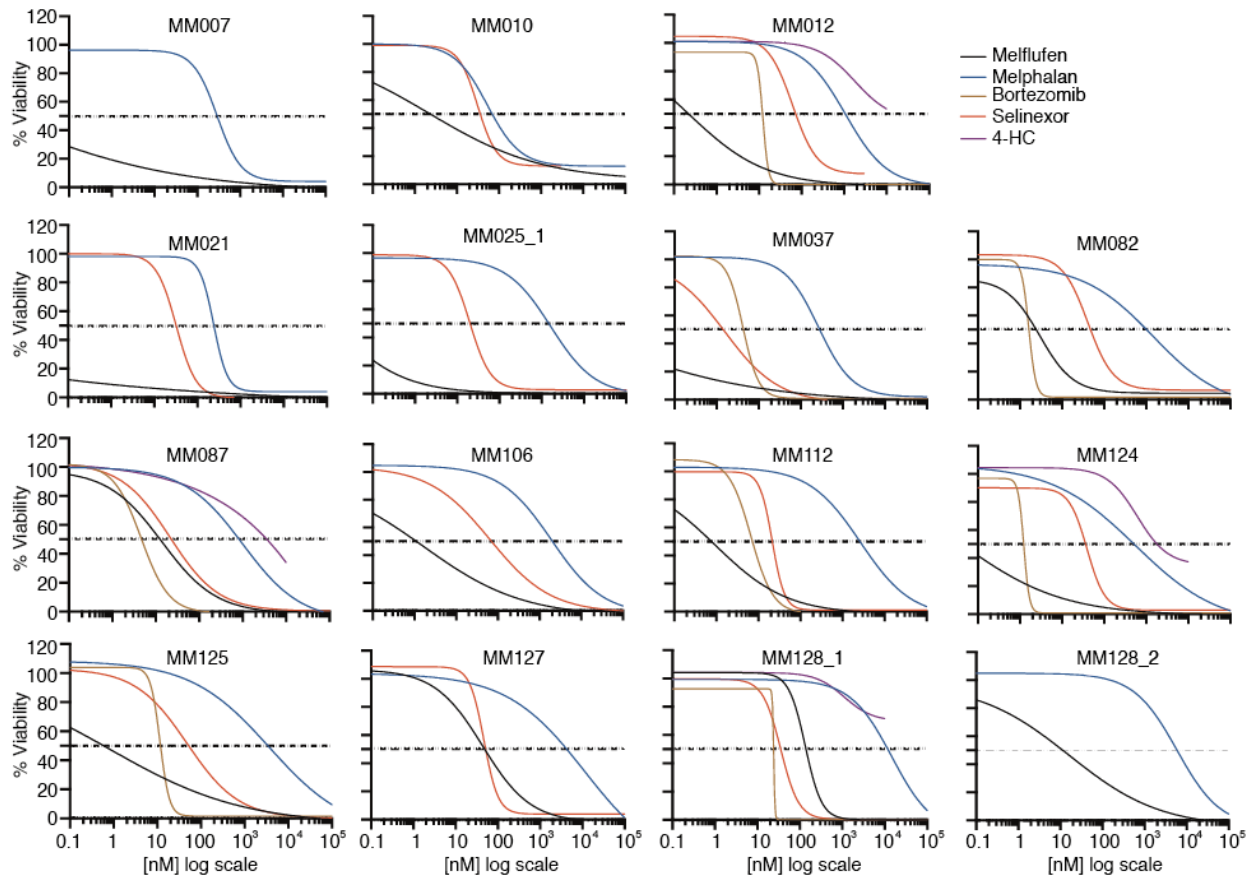

**Supplementary Figure S14. *Ex vivo* sensitivity of MM CD138+CD38+ plasma cells to melflufen, melphalan, bortezomib, selinexor, and 4-HC.** Patient samples were treated with drugs (melflufen, melphalan, bortezomib, selinexor, 4-HC), or with DMSO (control) for 72 h. After treatment cell viability was measured by multicolor high throughput flow cytometry, with cell viability (%) calculated and dose-response curves drawn. Drug sensitivity was measured in CD138+CD38+ cells from 15 MM patient samples (NDMM  $n = 6$ ; RRMM  $n = 9$ ) with drug dose-response curves shown for each sample: melflufen (black;  $n = 15$ ), melphalan (blue;  $n = 15$ ), bortezomib (brown;  $n = 8$ ), selinexor (red;  $n = 13$ ), and 4-HC (magenta;  $n = 4$ ). Some of the samples have only a limited number of drugs tested. This is due to there not being enough viable cells at the time of cell plating in these samples to perform drug testing for all 5 drugs.

DMSO, dimethyl sulfoxide; MM: multiple myeloma; NDMM: newly diagnosed multiple myeloma; RRMM: relapsed/refractory multiple myeloma; 4-HC: 4-hydroperoxycyclophosphamide

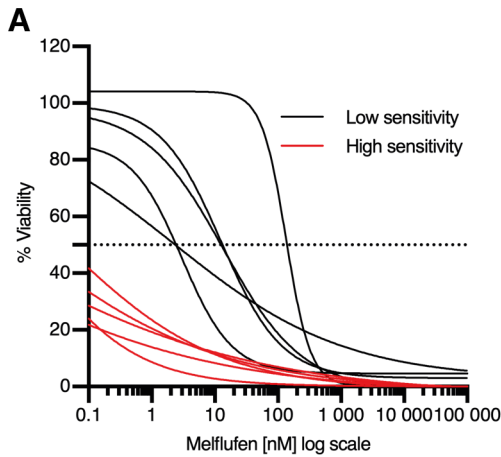

**B**

| Sample ID | Melflufen EC50 [nM] | Melflufen sensitivity group |
|-----------|---------------------|-----------------------------|
| MM037     | 0.000285            | High sensitivity            |
| MM007     | 0.001414            | High sensitivity            |
| *MM135    | 0.009226            | High sensitivity            |
| MM025_1   | 0.01096             | High sensitivity            |
| MM124     | 0.04291             | High sensitivity            |
| MM010     | 2.185               | Low sensitivity             |
| MM082     | 2.992               | Low sensitivity             |
| *MM117_2  | 12.56               | Low sensitivity             |
| MM087     | 13.81               | Low sensitivity             |
| MM128_1   | 134.5               | Low sensitivity             |

**Supplementary Figure S15. *Ex vivo* sensitivity of MM CD138+CD38+ plasma cells to melflufen in 10 MM patients with gene expression data also available from MM CD138+ plasma cells. (A)** Drug sensitivity was measured after 72h incubation with melflufen or with DMSO alone (control). Cell viability was assessed by multicolor high throughput flow cytometry using annexin V and 7AAD viability markers. The viability (%) of CD138+CD38+ cells was calculated, and dose response curves drawn. The MM patient samples were divided into two groups based on the sensitivity of their CD138+CD38+ cells to melflufen: high sensitivity (red: EC50 < 0.1 nM) and low sensitivity (black: EC50 > 2 nM) having five samples in each group. **(B)** EC50 values and melflufen sensitivity group are indicated for each of the ten samples. DMSO: dimethyl sulfoxide; \*: myeloma samples having *ex vivo* drug sensitivity data available only from melflufen.

High sensitivity Low sensitivity

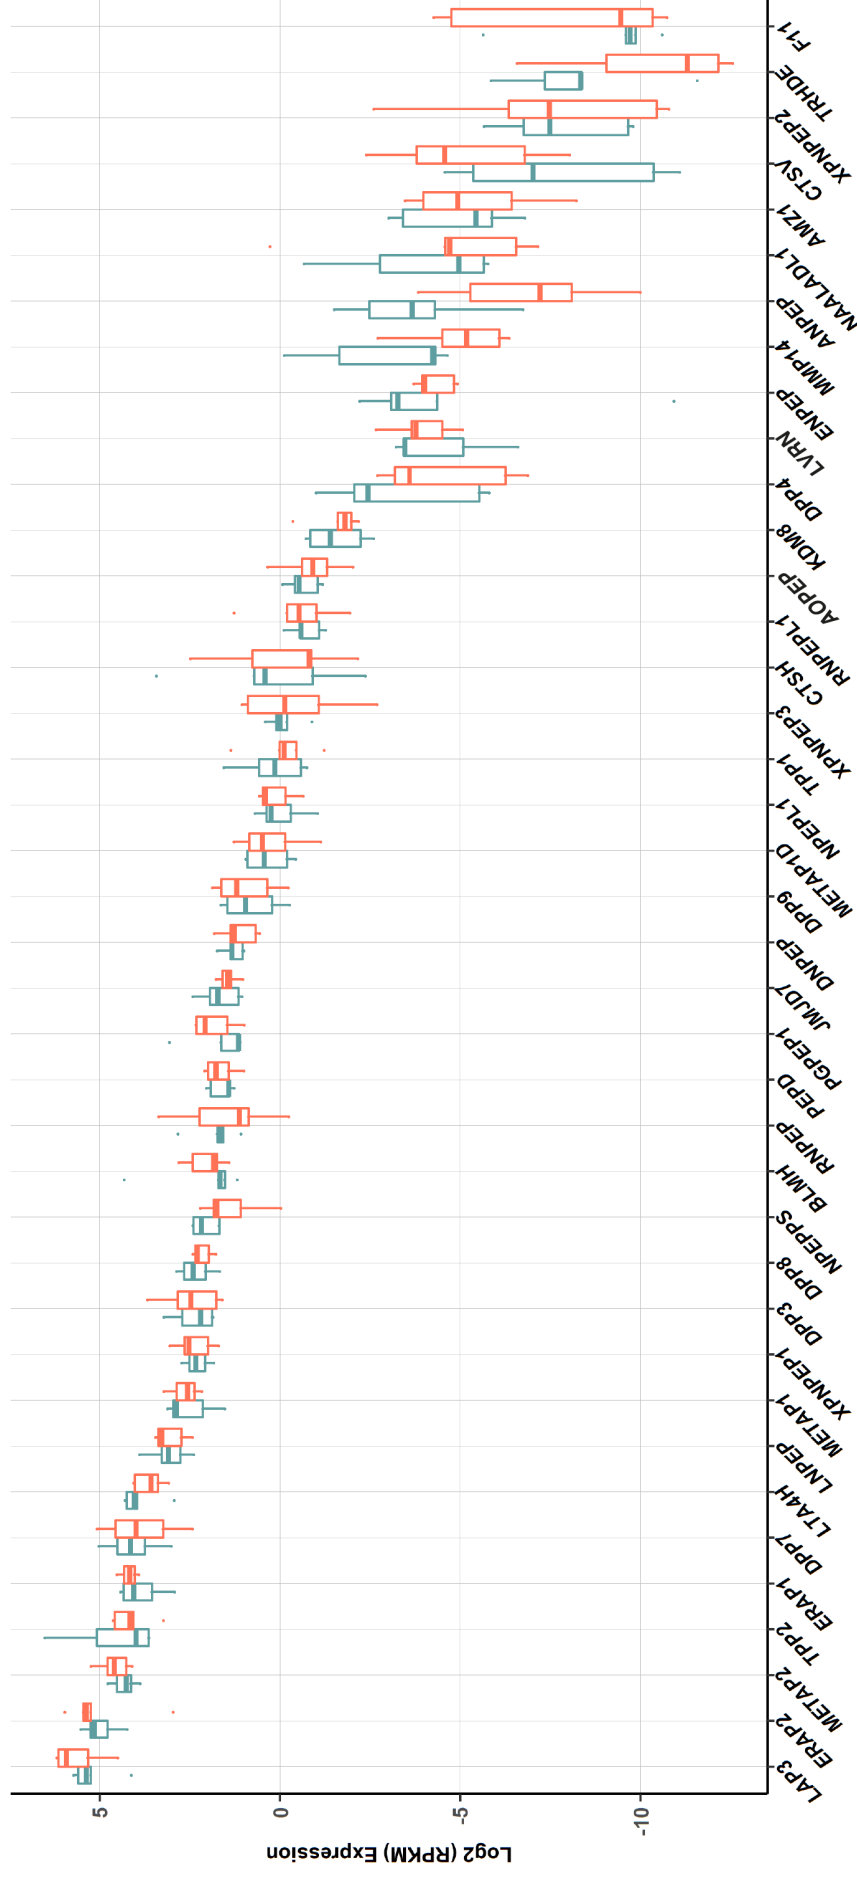

**Supplementary Figure S16. Correlation of the 39 aminopeptidase genes expression with melflufen high sensitivity (n=5) and low sensitivity (n=5) sample groups.** Bone marrow CD138+ cells were enriched from 10 myeloma patient samples and gene expression analysis performed. Bone marrow mononuclear cells from the same 10 samples flow cytometry-based ex vivo drug sensitivity testing was performed for CD138+CD38+ cells to determine sample sensitivity to melflufen. Ten myeloma patient samples having both aminopeptidase gene expression data (Log2 RPKM) and ex vivo melflufen drug sensitivity data (EC50) were divided into two groups based on their sensitivity to melflufen. EC50 values for the five high sensitivity samples (blue box plots;  $EC50 < 0.1$  nM) and for the five low sensitivity samples (red box plots;  $EC50 > 2$  nM). The mean gene expression levels (Log2 RPKM) of the 39 aminopeptidase genes were compared between the high sensitivity and low sensitivity sample groups. RPKM: Reads Per Kilobase of transcript per Million mapped reads

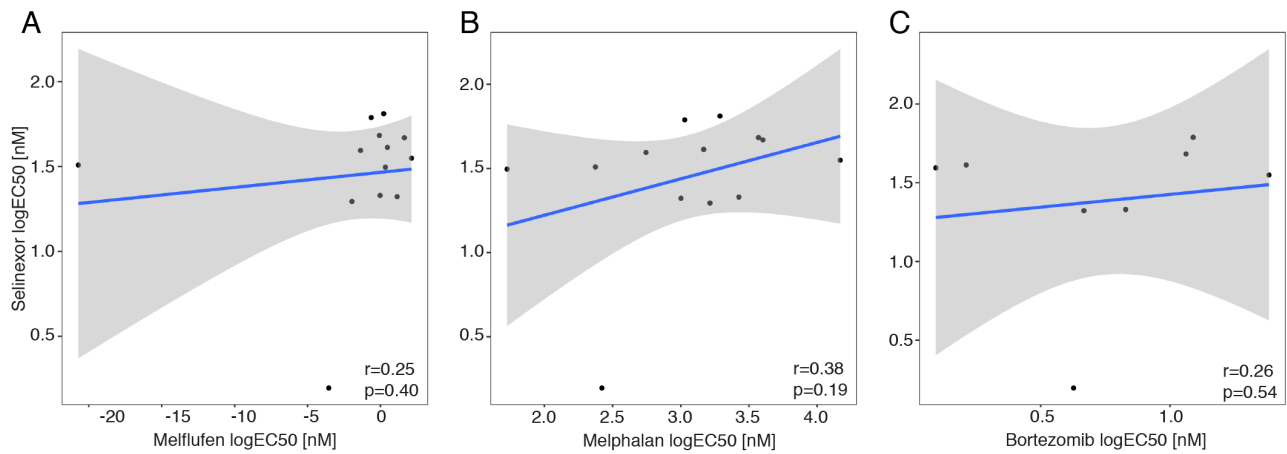

**Supplementary Figure S17. Correlation of drug sensitivity (EC50 values) to selinexor versus melflufen, melphalan and bortezomib in CD138+CD38+ plasma cells from MM patient samples.** EC50 values were calculated from MM patient samples using multicolor high throughput flow cytometry-based drug sensitivity testing. Correlation of selinexor EC50 with **(A)** melflufen EC50 ( $n = 13$ ), **(B)** with melphalan EC50 ( $n = 13$ ), and **(C)** with bortezomib EC50 ( $n = 8$ ) values. EC50: half-maximal effective concentration; MM: multiple myeloma.

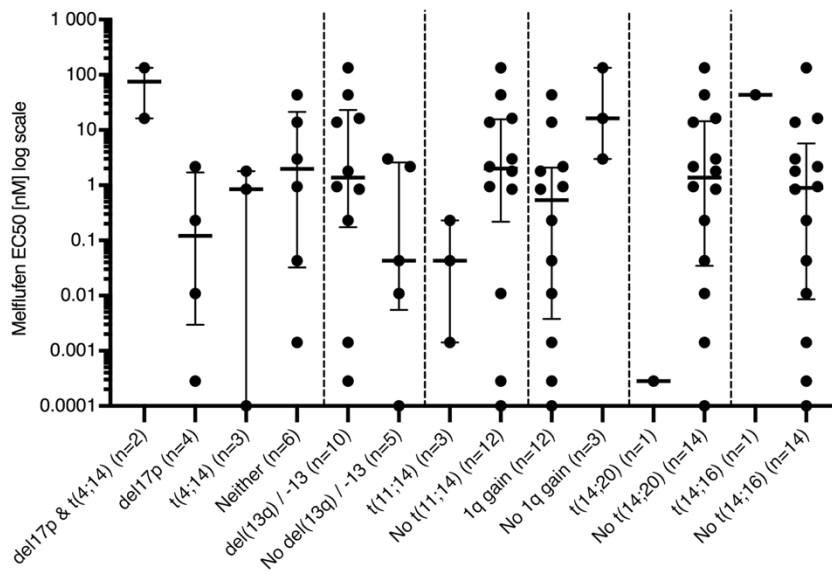

**Supplementary Figure S18. Cytogenetics and melflufen sensitivity in CD138+CD38+ plasma cells from MM patient samples.** EC50 values were calculated from 15 MM patient samples using multicolor high throughput flow cytometry-based drug sensitivity testing. Samples were grouped based on patient clinical cytogenetics results. EC50: half-maximal effective concentration; MM: multiple myeloma.

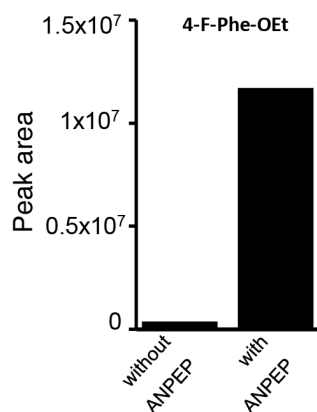

**Supplementary Figure S19. Aminopeptidase ANPEP can hydrolyze melflufen to melphalan and 4-F-Phe-OEt.** Incubation buffer and substrates were mixed and incubated without and with ANPEP for 2h at 37°C (with duplicate incubations). The incubation was stopped by adding ice cold acetonitrile. 4-F-Phe-OEt was then quantified using LC-HR-MS, with concentrations presented as the peak area in the figure.

4-F-Phe-OEt: para-fluoro-L-phenylalanine ethyl ester; LC-HR-MS: liquid chromatography-high resolution mass spectrometry

## SUPPLEMENTARY TABLES

Supplementary Table 1. FIMM dataset patient sample characteristics and sample analysis information (1/15)

### Patient sample characteristics

| Patient ID | Sample ID | Sample type | Disease stage | Gender | Age when sample taken | Age at diagnosis | M-component heavy chain type | M-component light chain type | ISS | Clinical                     |                         |                    |
|------------|-----------|-------------|---------------|--------|-----------------------|------------------|------------------------------|------------------------------|-----|------------------------------|-------------------------|--------------------|
|            |           |             |               |        |                       |                  |                              |                              |     | Alkylating agents (MEL, CPM) | sensitivity: Bortezomib | sensitivity: IMiDs |
| MM001      | MM001     | CD138+      | RRMM          | Female | 67                    | 62               | IgA                          | kappa                        | NA  | Exposed                      | Not exposed             | Exposed            |
|            | MM002_1   | CD138+      | RRMM          |        | 66                    |                  |                              |                              |     | Exposed                      | Exposed                 | Exposed            |
| MM002      | MM002_2   | CD138+      | RRMM          | Female | 68                    | 62               | IgG                          | kappa                        | 2   | Exposed                      | Exposed                 | Exposed            |
|            | MM002_3   | CD138+      | RRMM          |        | 69                    |                  |                              |                              |     | Exposed                      | Refractory              | Refractory         |
| MM003      | MM003     | CD138+      | RRMM          | Male   | 76                    | 71               | IgA                          | kappa                        | 2   | Exposed                      | Exposed                 | Exposed            |
| MM004      | MM004     | CD138+      | RRMM          | Female | 72                    | 63               | IgG                          | kappa                        | 1   | Exposed                      | Refractory              | Exposed            |
| MM005      | MM005     | CD138+      | RRMM          | Male   | 70                    | 67               | IgG                          | lambda                       | 1   | Exposed                      | Refractory              | Refractory         |
| MM006      | MM006     | CD138+      | RRMM          | Female | 71                    | 63               | not detected                 | lambda                       | 2   | Exposed                      | Exposed                 | Exposed            |
| MM007      | MM007     | CD138+      | RRMM          | Male   | 78                    | 74               | not detected                 | not detected                 | 2   | Exposed                      | Exposed                 | Not exposed        |
|            |           | BM-MNC      |               |        |                       |                  |                              |                              |     |                              |                         |                    |
| MM008      | MM008     | CD138+      | RRMM          | Female | 71                    | 64               | IgA                          | kappa                        | 3   | Exposed                      | Refractory              | Exposed            |
| MM009      | MM009     | CD138+      | RRMM          | Female | 72                    | 64               | IgA                          | kappa                        | NA  | Exposed                      | Not exposed             | Exposed            |
| MM010      | MM010     | CD138+      | RRMM          | Male   | 67                    | 61               | NA                           | kappa                        | 1   | Exposed                      | Not exposed             | Exposed            |
|            |           | BM-MNC      |               |        |                       |                  |                              |                              |     |                              |                         |                    |
| MM011      | MM011     | CD138+      | RRMM          | Female | 66                    | 57               | not detected                 | lambda                       | NA  | Refractory                   | Exposed                 | Refractory         |
| MM012      | MM012     | BM-MNC      | RRMM          | Male   | 80                    | 77               | not detected                 | lambda                       | 1   | Refractory                   | Refractory              | Exposed            |
| MM013      | MM013     | CD138+      | RRMM          | Male   | 70                    | 60               | IgA                          | kappa                        | 1   | Exposed                      | Refractory              | Refractory         |
| MM014      | MM014_1   | CD138+      | RRMM          | Male   | 71                    | 62               | IgA                          | lambda                       | NA  | Refractory                   | Refractory              | Refractory         |
|            | MM014_2   | CD138+      | RRMM          |        | 71                    |                  |                              |                              |     | Refractory                   | Refractory              | Refractory         |
|            | MM014_3   | CD138+      | RRMM          |        | 71                    |                  |                              |                              |     | Refractory                   | Refractory              | Refractory         |
|            | MM014_4   | CD138+      | RRMM          |        | 72                    |                  |                              |                              |     | Refractory                   | Refractory              | Refractory         |

**Supplementary Table 1. FIMM dataset patient sample characteristics and sample analysis information (2/15)**

| Patient ID | Sample ID | Sample type | Disease stage | Gender | Age when sample taken | Age at diagnosis | M-component heavy chain type | M-component light chain type | ISS | Clinical                                  |                         |                    |
|------------|-----------|-------------|---------------|--------|-----------------------|------------------|------------------------------|------------------------------|-----|-------------------------------------------|-------------------------|--------------------|
|            |           |             |               |        |                       |                  |                              |                              |     | sensitivity: Alkylating agents (MEL, CPM) | sensitivity: Bortezomib | sensitivity: IMiDs |
| MM015      | MM015     | CD138+      | RRMM          | Male   | 66                    | 60               | not detected                 | not detected                 | 1   | Exposed                                   | Not exposed             | Exposed            |
| MM016      | MM016     | CD138+      | RRMM          | Male   | 77                    | 69               | IgG                          | kappa                        | NA  | Exposed                                   | Refractory              | Refractory         |
| MM017      | MM017_1   | CD138+      | RRMM          | Female | 69                    | 60               | IgA                          | lambda                       | 1   | Exposed                                   | Exposed                 | Not exposed        |
|            | MM017_2   | CD138+      | RRMM          |        | 70                    |                  |                              |                              |     | Exposed                                   | Refractory              | Not exposed        |
|            | MM017_3   | CD138+      | RRMM          |        | 70                    |                  |                              |                              |     | Exposed                                   | Refractory              | Refractory         |
| MM018      | MM018     | CD138+      | RRMM          | Male   | 63                    | 44               | IgG                          | kappa                        | NA  | Exposed                                   | Not exposed             | Refractory         |
| MM019      | MM019     | CD138+      | RRMM          | Male   | 72                    | 65               | IgG                          | kappa                        | 2   | Exposed                                   | Exposed                 | Refractory         |
| MM020      | MM020     | CD138+      | RRMM          | Female | 64                    | 55               | not detected                 | lambda                       | NA  | Exposed                                   | Exposed                 | Exposed            |
| MM021      | MM021     | BM-MNC      | RRMM          | Male   | 47                    | 37               | NA                           | NA                           | NA  | Exposed                                   | Refractory              | Refractory         |
| MM022      | MM022_1   | CD138+      | RRMM          | Male   | 72                    | 67               | IgA                          | lambda                       | 3   | Exposed                                   | Exposed                 | Refractory         |
|            | MM022_2   | CD138+      | RRMM          |        | 75                    |                  |                              |                              |     | Exposed                                   | Exposed                 | Refractory         |
|            | MM022_3   | CD138+      | RRMM          |        | 76                    |                  |                              |                              |     | Refractory                                | Refractory              | Refractory         |
| MM023      | MM023     | CD138+      | RRMM          | Male   | 67                    | 50               | IgG                          | kappa                        | 1   | Refractory                                | Refractory              | Refractory         |
| MM024      | MM024     | CD138+      | RRMM          | Male   | 56                    | 45               | IgG                          | kappa                        | NA  | Exposed                                   | Refractory              | Refractory         |
| MM025      | MM025_1   | CD138+      | RRMM          | Male   | 63                    | 56               | IgG                          | kappa                        | NA  | Exposed                                   | Exposed                 | Refractory         |
|            | MM025_2   | CD138+      |               |        | RRMM                  |                  |                              |                              |     | 63                                        | Exposed                 | Refractory         |
| MM026      | MM026     | CD138+      | RRMM          | Male   | 73                    | 61               | not detected                 | not detected                 | 1   | Exposed                                   | Refractory              | Refractory         |
| MM027      | MM027     | CD138+      | RRMM          | Female | 72                    | 68               | NA                           | NA                           | NA  | Refractory                                | Refractory              | Refractory         |
| MM028      | MM028     | CD138+      | RRMM          | Male   | 65                    | 58               | NA                           | NA                           | NA  | Exposed                                   | Exposed                 | Not exposed        |
| MM029      | MM029     | CD138+      | RRMM          | Female | 55                    | 50               | IgA                          | lambda                       | 3   | Exposed                                   | Exposed                 | Exposed            |
| MM030      | MM030_1   | CD138+      | RRMM          | Male   | 72                    | 68               | IgA                          | lambda                       | 3   | Refractory                                | Exposed                 | Refractory         |
|            | MM030_2   | CD138+      | RRMM          |        | 74                    |                  |                              |                              |     | Refractory                                | Refractory              | Refractory         |
| MM031      | MM031     | CD138+      | RRMM          | Male   | 81                    | 75               | IgG                          | kappa                        | 2   | Exposed                                   | Exposed                 | Exposed            |



Supplementary Table 1. FIMM dataset patient sample characteristics and sample analysis information (3/15)

| Patient ID | Sample ID | Sample type | Disease stage | Gender | Age when sample taken | Age at diagnosis | M-component heavy chain type | M-component light chain type | ISS | Clinical                                  |                                  |                             |
|------------|-----------|-------------|---------------|--------|-----------------------|------------------|------------------------------|------------------------------|-----|-------------------------------------------|----------------------------------|-----------------------------|
|            |           |             |               |        |                       |                  |                              |                              |     | sensitivity: Alkylating agents (MEL, CPM) | Clinical sensitivity: Bortezomib | Clinical sensitivity: IMiDs |
| MM032      | MM032_1   | CD138+      | RRMM          | Male   | 66                    | 64               | not detected                 | kappa                        | 1   | Not exposed                               | Not exposed                      | Not exposed                 |
|            | MM032_2   | CD138+      | RRMM          |        | 69                    |                  |                              |                              |     | Exposed                                   | Exposed                          | Refractory                  |
| MM033      | MM033_1   | CD138+      | RRMM          | Male   | 70                    | 68               | IgA                          | lambda                       | 2   | Refractory                                | Refractory                       | Exposed                     |
|            | MM033_2   | CD138+      | RRMM          |        | 71                    |                  |                              |                              |     | Refractory                                | Refractory                       | Refractory                  |
|            | MM033_3   | CD138+      | RRMM          |        | 71                    |                  |                              |                              |     | Refractory                                | Refractory                       | Refractory                  |
|            | MM033_4   | CD138+      | RRMM          |        | 72                    |                  |                              |                              |     | Refractory                                | Refractory                       | Refractory                  |
| MM034      | MM034_1   | CD138+      | RRMM          | Female | 68                    | 65               | IgG                          | kappa                        | 1   | Exposed                                   | Exposed                          | Not exposed                 |
|            | MM034_2   | CD138+      | RRMM          |        | 70                    |                  |                              |                              |     | Exposed                                   | Exposed                          | Refractory                  |
| MM035      | MM035     | CD138+      | RRMM          | Male   | 55                    | 52               | IgA                          | kappa                        | 1   | Exposed                                   | Exposed                          | Exposed                     |
| MM036      | MM036_1   | CD138+      | RRMM          | Male   | 69                    | 63               | IgA                          | kappa                        | 1   | Exposed                                   | Exposed                          | Not exposed                 |
|            | MM036_2   | CD138+      | RRMM          |        | 69                    |                  |                              |                              |     | Exposed                                   | Exposed                          | Not exposed                 |
| MM037      | MM037     | CD138+      | RRMM          | Female | 63                    | 58               | IgG                          | kappa                        | 2   | Exposed                                   | Exposed                          | Exposed                     |
|            |           | BM-MNC      |               |        |                       |                  |                              |                              |     |                                           |                                  |                             |
| MM038      | MM038     | CD138+      | RRMM          | Female | 69                    | 63               | IgG                          | kappa                        | 2   | Exposed                                   | Exposed                          | Exposed                     |
| MM039      | MM039     | CD138+      | RRMM          | Female | 69                    | 64               | IgG                          | kappa                        | 2   | Exposed                                   | Exposed                          | Refractory                  |
| MM040      | MM040     | CD138+      | RRMM          | Female | 69                    | 68               | IgG                          | lambda                       | 3   | Refractory                                | Refractory                       | Not exposed                 |
| MM041      | MM041     | CD138+      | RRMM          | Female | 60                    | 59               | not detected                 | kappa                        | 2   | Exposed                                   | Exposed                          | Not exposed                 |
| MM042      | MM042     | CD138+      | RRMM          | Male   | 76                    | 75               | IgG                          | kappa                        | 2   | Exposed                                   | Exposed                          | Refractory                  |
| MM043      | MM043_1   | CD138+      | RRMM          | Female | 64                    | 56               | IgG                          | kappa                        | NA  | Exposed                                   | Refractory                       | Refractory                  |
|            | MM043_2   | CD138+      | RRMM          |        | 66                    |                  |                              |                              |     | Exposed                                   | Refractory                       | Refractory                  |
| MM044      | MM044     | CD138+      | RRMM          | Female | 71                    | 64               | IgG                          | kappa                        | 3   | Exposed                                   | Exposed                          | Refractory                  |
| MM045      | MM045     | CD138+      | RRMM          | Male   | 75                    | 67               | IgG                          | lambda                       | NA  | Exposed                                   | Not exposed                      | Exposed                     |
| MM046      | MM046_1   | CD138+      | RRMM          | Male   | 59                    | 58               | not detected                 | lambda                       | 3   | Exposed                                   | Exposed                          | Refractory                  |
|            | MM046_2   | CD138+      | RRMM          |        | 59                    |                  |                              |                              |     | Exposed                                   | Refractory                       | Refractory                  |
| MM047      | MM047     | CD138+      | RRMM          | Male   | 70                    | 66               | IgG                          | kappa                        | 2   | Exposed                                   | Exposed                          | Exposed                     |

Supplementary Table 1. FIMM dataset patient sample characteristics and sample analysis information (4/15)

| Patient ID | Sample ID | Sample type | Disease stage      | Gender | Age when sample taken | Age at diagnosis | M-component heavy chain type | M-component light chain type | ISS | Clinical                                  |                         |                    |
|------------|-----------|-------------|--------------------|--------|-----------------------|------------------|------------------------------|------------------------------|-----|-------------------------------------------|-------------------------|--------------------|
|            |           |             |                    |        |                       |                  |                              |                              |     | sensitivity: Alkylating agents (MEL, CPM) | sensitivity: Bortezomib | sensitivity: IMiDs |
| MM048      | MM048_1   | CD138+      | RRMM               | Male   | 69                    | 59               | IgA                          | kappa                        | NA  | Exposed                                   | Refractory              | Exposed            |
|            | MM048_2   | CD138+      | RRMM               |        | 72                    |                  |                              |                              |     | Exposed                                   | Refractory              | Exposed            |
| MM049      | MM049     | CD138+      | RRMM               | Male   | 62                    | 55               | IgG                          | kappa                        | 2   | Not exposed                               | Exposed                 | Exposed            |
| MM050      | MM050     | CD138+      | RRMM               | Female | 70                    | 68               | IgG                          | kappa                        | 1   | Exposed                                   | Refractory              | Refractory         |
| MM051      | MM051_1   | CD138+      | NDMM (not treated) | Male   | 56                    | 56               | IgA                          | kappa                        | 1   | Not exposed                               | Not exposed             | Not exposed        |
|            | MM051_2   | CD138+      | RRMM               |        | 58                    |                  |                              |                              |     | Exposed                                   | Exposed                 | Refractory         |
| MM052      | MM052_1   | CD138+      | RRMM               | Male   | 60                    | 59               | IgA                          | lambda                       | 3   | Exposed                                   | Exposed                 | Refractory         |
|            | MM052_2   | CD138+      | RRMM               |        | 61                    |                  |                              |                              |     | Exposed                                   | Exposed                 | Refractory         |
| MM053      | MM053     | CD138+      | NDMM (not treated) | Female | 51                    | 51               | IgG                          | kappa                        | 1   | Not exposed                               | Not exposed             | Not exposed        |
| MM054      | MM054     | CD138+      | RRMM               | Female | 82                    | 76               | IgG                          | kappa                        | 1   | Exposed                                   | Not exposed             | Refractory         |
| MM055      | MM055     | CD138+      | RRMM               | Male   | 72                    | 66               | IgG                          | kappa                        | 2   | Refractory                                | Exposed                 | Exposed            |
| MM056      | MM056_1   | CD138+      | NDMM (not treated) | Female | 69                    | 69               | IgA                          | kappa                        | 1   | Not exposed                               | Not exposed             | Not exposed        |
|            | MM056_2   | CD138+      | RRMM               |        | 71                    |                  |                              |                              |     | Exposed                                   | Exposed                 | Refractory         |
| MM057      | MM057_1   | CD138+      | RRMM               | Male   | 57                    | 56               | not detected                 | kappa                        | 1   | Exposed                                   | Exposed                 | Not exposed        |
|            | MM057_2   | CD138+      | RRMM               |        | 58                    |                  |                              |                              |     | Exposed                                   | Refractory              | Refractory         |
|            | MM057_3   | CD138+      | RRMM               |        | 58                    |                  |                              |                              |     | Exposed                                   | Refractory              | Refractory         |
|            | MM057_4   | CD138+      | RRMM               |        | 59                    |                  |                              |                              |     | Refractory                                | Refractory              | Refractory         |
|            | MM057_5   | CD138+      | RRMM               |        | 59                    |                  |                              |                              |     | Refractory                                | Refractory              | Refractory         |
|            | MM057_6   | CD138+      | RRMM               |        | 60                    |                  |                              |                              |     | Refractory                                | Refractory              | Refractory         |
| MM058      | MM058_1   | CD138+      | RRMM               | Male   | 64                    | 60               | IgG                          | kappa                        | 1   | Exposed                                   | Refractory              | Refractory         |
|            | MM058_2   | CD138+      | RRMM               |        | 65                    |                  |                              |                              |     | Exposed                                   | Refractory              | Refractory         |
| MM059      | MM059     | CD138+      | RRMM               | Female | 58                    | 56               | IgG                          | kappa                        | 2   | Exposed                                   | Exposed                 | Refractory         |
| MM060      | MM060     | CD138+      | RRMM               | Male   | 61                    | 57               | IgG                          | kappa                        | 3   | Exposed                                   | Exposed                 | Not exposed        |
| MM061      | MM061_1   | CD138+      | RRMM               | Male   | 52                    | 49               | IgG                          | kappa                        | NA  | Exposed                                   | Refractory              | Refractory         |
|            | MM061_2   | CD138+      | RRMM               |        | 53                    |                  |                              |                              |     | Exposed                                   | Refractory              | Refractory         |

Supplementary Table 1. FIMM dataset patient sample characteristics and sample analysis information (5/16)

| Patient ID | Sample ID | Sample type | Disease stage       | Gender | Age when sample taken | Age at diagnosis | M-component heavy chain type | M-component light chain type | ISS | Clinical sensitivity:        |                                  |                             |
|------------|-----------|-------------|---------------------|--------|-----------------------|------------------|------------------------------|------------------------------|-----|------------------------------|----------------------------------|-----------------------------|
|            |           |             |                     |        |                       |                  |                              |                              |     | Alkylating agents (MEL, CPM) | Clinical sensitivity: Bortezomib | Clinical sensitivity: IMiDs |
| MM062      | MM062     | CD138+      | NDMM (not treated)  | Male   | 68                    | 68               | IgA                          | lambda                       | NA  | Not exposed                  | Not exposed                      | Not exposed                 |
| MM063      | MM063     | CD138+      | NDMM (<30d treated) | Male   | 66                    | 66               | not detected                 | kappa                        | 1   | Not exposed                  | Not exposed                      | Not exposed                 |
| MM064      | MM064     | CD138+      | NDMM (not treated)  | Female | 68                    | 68               | IgG                          | kappa                        | 3   | Not exposed                  | Not exposed                      | Not exposed                 |
| MM065      | MM065     | CD138+      | NDMM (not treated)  | Male   | 61                    | 61               | NA                           | kappa                        | 2   | Not exposed                  | Not exposed                      | Not exposed                 |
| MM066      | MM066     | CD138+      | NDMM (not treated)  | Male   | 67                    | 67               | IgG                          | lambda                       | 3   | Not exposed                  | Not exposed                      | Not exposed                 |
| MM067      | MM067     | CD138+      | NDMM (not treated)  | Male   | 63                    | 63               | IgG                          | kappa                        | 2   | Not exposed                  | Not exposed                      | Not exposed                 |
| MM068      | MM068_1   | CD138+      | RRMM                | Female | 74                    | 74               | not detected                 | kappa                        | 1   | Not exposed                  | Exposed                          | Not exposed                 |
|            | MM068_2   | CD138+      | RRMM                |        | 77                    |                  |                              |                              |     | Refractory                   | Exposed                          | Refractory                  |
| MM069      | MM069     | CD138+      | NDMM (not treated)  | Male   | 55                    | 51               | not detected                 | kappa                        | 1   | Not exposed                  | Not exposed                      | Not exposed                 |
| MM070      | MM070     | CD138+      | NDMM (not treated)  | Female | 55                    | 55               | IgA                          | lambda                       | 2   | Not exposed                  | Not exposed                      | Not exposed                 |
| MM071      | MM071     | CD138+      | RRMM                | Male   | 68                    | 65               | IgG                          | kappa                        | 3   | Exposed                      | Exposed                          | Refractory                  |
| MM072      | MM072     | CD138+      | NDMM (not treated)  | Male   | 63                    | 63               | IgG                          | kappa                        | 2   | Not exposed                  | Not exposed                      | Not exposed                 |
| MM073      | MM073     | CD138+      | RRMM                | Female | 78                    | 72               | IgG                          | kappa                        | 2   | Exposed                      | Not exposed                      | Exposed                     |
| MM074      | MM074     | CD138+      | NDMM (not treated)  | Female | 59                    | 59               | IgG                          | lambda                       | 2   | Not exposed                  | Not exposed                      | Not exposed                 |
| MM075      | MM075     | CD138+      | NDMM (not treated)  | Male   | 71                    | 71               | IgA                          | kappa                        | 2   | Not exposed                  | Not exposed                      | Not exposed                 |
| MM076      | MM076     | CD138+      | NDMM (not treated)  | Female | 59                    | 59               | IgG                          | kappa                        | 2   | Not exposed                  | Not exposed                      | Not exposed                 |
| MM077      | MM077     | CD138+      | RRMM                | Female | 66                    | 65               | IgA                          | lambda                       | 3   | Refractory                   | Exposed                          | Exposed                     |
| MM078      | MM078_1   | CD138+      | NDMM (<30d treated) | Male   | 66                    | 66               | not detected                 | not detected                 | 3   | Not exposed                  | Not exposed                      | Not exposed                 |
|            | MM078_2   | CD138+      | RRMM                |        | 67                    |                  |                              |                              |     | Exposed                      | Exposed                          | Not exposed                 |
| MM079      | MM079     | CD138+      | NDMM (not treated)  | Female | 61                    | 61               | IgG                          | kappa                        | NA  | Not exposed                  | Not exposed                      | Not exposed                 |
| MM080      | MM080     | CD138+      | RRMM                | Male   | 84                    | 81               | IgG                          | kappa                        | 3   | Exposed                      | Refractory                       | Refractory                  |
| MM081      | MM081     | CD138+      | RRMM                | Female | 75                    | 66               | IgA                          | lambda                       | NA  | Exposed                      | Exposed                          | Not exposed                 |
| MM082      | MM082     | CD138+      | RRMM                | Female | 58                    | 55               | IgG                          | kappa                        | NA  | Exposed                      | Exposed                          | Exposed                     |
|            |           | BM-MNC      |                     |        |                       |                  |                              |                              |     |                              |                                  |                             |
| MM083      | MM083_1   | CD138+      | NDMM (<30d treated) | Male   | 66                    | 66               | IgG                          | kappa                        | 2   | Not exposed                  | Not exposed                      | Not exposed                 |
|            | MM083_2   | CD138+      | RRMM                |        | 67                    |                  |                              |                              |     | Exposed                      | Exposed                          | Not exposed                 |

Supplementary Table 1. FIMM dataset patient sample characteristics and sample analysis information (6/15)

| Patient ID | Sample ID | Sample type | Disease stage       | Gender | Age when sample taken | Age at diagnosis | M-component heavy chain type | M-component light chain type | ISS | Clinical                                  |                                  |                             |
|------------|-----------|-------------|---------------------|--------|-----------------------|------------------|------------------------------|------------------------------|-----|-------------------------------------------|----------------------------------|-----------------------------|
|            |           |             |                     |        |                       |                  |                              |                              |     | sensitivity: Alkylating agents (MEL, CPM) | Clinical sensitivity: Bortezomib | Clinical sensitivity: IMiDs |
| MM084      | MM084     | CD138+      | RRMM                | Male   | 68                    | 66               | IgG                          | lambda                       | 2   | Exposed                                   | Exposed                          | Exposed                     |
| MM085      | MM085     | CD138+      | NDMM (not treated)  | Male   | 66                    | 66               | IgG                          | kappa                        | 2   | Not exposed                               | Not exposed                      | Not exposed                 |
| MM086      | MM086     | CD138+      | NDMM (not treated)  | Male   | 64                    | 64               | ei tutkittu                  | ei tutkittu                  | 3   | Not exposed                               | Not exposed                      | Not exposed                 |
| MM087      | MM087     | CD138+      | NDMM (not treated)  | Female | 70                    | 70               | not detected                 | not detected                 | 3   | Not exposed                               | Not exposed                      | Not exposed                 |
|            |           | BM-MNC      |                     |        |                       |                  |                              |                              |     |                                           |                                  |                             |
| MM088      | MM088     | CD138+      | NDMM (not treated)  | Female | 54                    | 54               | IgA                          | lambda                       | 2   | Not exposed                               | Not exposed                      | Not exposed                 |
| MM089      | MM089     | CD138+      | NDMM (not treated)  | Male   | 46                    | 46               | not detected                 | kappa                        | 1   | Not exposed                               | Not exposed                      | Not exposed                 |
| MM090      | MM090     | CD138+      | NDMM (not treated)  | Female | 69                    | 69               | IgA                          | lambda                       | 2   | Not exposed                               | Not exposed                      | Not exposed                 |
| MM091      | MM091     | CD138+      | RRMM                | Male   | 61                    | 55               | IgG                          | kappa                        | NA  | Exposed                                   | Exposed                          | Refractory                  |
| MM092      | MM092     | CD138+      | RRMM                | Male   | 75                    | 71               | IgG                          | lambda                       | 2   | Exposed                                   | Not exposed                      | Exposed                     |
| MM093      | MM093     | CD138+      | NDMM (<30d treated) | Male   | 58                    | 58               | IgA                          | lambda                       | 2   | Not exposed                               | Not exposed                      | Not exposed                 |
| MM094      | MM094     | CD138+      | NDMM (not treated)  | Female | 67                    | 67               | IgG                          | kappa                        | 2   | Not exposed                               | Not exposed                      | Not exposed                 |
| MM095      | MM095     | CD138+      | RRMM                | Male   | 49                    | 41               | IgG                          | lambda                       | NA  | Exposed                                   | Refractory                       | Refractory                  |
| MM096      | MM096     | CD138+      | NDMM (<30d treated) | Female | 69                    | 69               | not detected                 | not detected                 | NA  | Not exposed                               | Not exposed                      | Not exposed                 |
| MM097      | MM097     | CD138+      | RRMM                | Female | 77                    | 75               | not detected                 | kappa                        | 2   | Exposed                                   | Exposed                          | Not exposed                 |
| MM098      | MM098     | CD138+      | RRMM                | Male   | 57                    | 57               | IgG                          | lambda                       | 3   | Refractory                                | Refractory                       | Exposed                     |
| MM099      | MM099     | CD138+      | RRMM                | Male   | 80                    | 78               | IgA                          | kappa                        | 3   | Refractory                                | Refractory                       | Refractory                  |
| MM100      | MM100     | CD138+      | NDMM (not treated)  | Male   | 53                    | 53               | not detected                 | kappa                        | 1   | Not exposed                               | Not exposed                      | Not exposed                 |
| MM101      | MM101     | CD138+      | NDMM (not treated)  | Male   | 65                    | 64               | IgA                          | kappa                        | 2   | Not exposed                               | Not exposed                      | Not exposed                 |
| MM102      | MM102     | CD138+      | RRMM                | Male   | 68                    | 66               | NA                           | NA                           | NA  | Exposed                                   | Exposed                          | Exposed                     |
| MM103      | MM103     | CD138+      | RRMM                | Male   | 66                    | 66               | not detected                 | kappa                        | 1   | Not exposed                               | Not exposed                      | Not exposed                 |
| MM104      | MM104     | CD138+      | NDMM (not treated)  | Female | 66                    | 66               | not detected                 | kappa                        | 1   | Not exposed                               | Not exposed                      | Not exposed                 |
| MM105      | MM105     | CD138+      | NDMM (not treated)  | Female | 76                    | 76               | IgA                          | kappa                        | 1   | Not exposed                               | Not exposed                      | Not exposed                 |
| MM106      | MM106     | BM-MNC      | NDMM (not treated)  | Male   | 58                    | 58               | IgG                          | kappa                        | NA  | Not exposed                               | Not exposed                      | Not exposed                 |
| MM107      | MM107     | CD138+      | RRMM                | Female | 67                    | 66               | IgG                          | kappa                        | NA  | Exposed                                   | Exposed                          | Not exposed                 |

Supplementary Table 1. FIMM dataset patient sample characteristics and sample analysis information (7/15)

| Patient ID | Sample ID | Sample type | Disease stage       | Gender | Age when sample taken | Age at diagnosis | M-component heavy chain type | M-component light chain type | ISS | Clinical                                  |                                  |                             |
|------------|-----------|-------------|---------------------|--------|-----------------------|------------------|------------------------------|------------------------------|-----|-------------------------------------------|----------------------------------|-----------------------------|
|            |           |             |                     |        |                       |                  |                              |                              |     | sensitivity: Alkylating agents (MEL, CPM) | Clinical sensitivity: Bortezomib | Clinical sensitivity: IMiDs |
| MM108      | MM108     | CD138+      | NDMM (not treated)  | Male   | 73                    | 73               | IgG                          | lambda                       | 2   | Not exposed                               | Not exposed                      | Not exposed                 |
| MM109      | MM109     | CD138+      | RRMM                | Male   | 72                    | 65               | IgG                          | kappa                        | 2   | Refractory                                | Refractory                       | Refractory                  |
| MM110      | MM110     | CD138+      | NDMM (not treated)  | Female | 84                    | 84               | IgA                          | lambda                       | 3   | Not exposed                               | Not exposed                      | Not exposed                 |
| MM111      | MM111_1   | CD138+      | RRMM                | Male   | 60                    | 60               | IgA                          | lambda                       | 3   | Exposed                                   | Refractory                       | Exposed                     |
|            | MM111_2   | CD138+      | RRMM                |        | 61                    |                  |                              |                              |     | Exposed                                   | Refractory                       | Exposed                     |
| MM112      | MM112     | BM-MNC      | NDMM (not treated)  | Female | 71                    | 71               | IgG                          | kappa                        | 2   | Not exposed                               | Not exposed                      | Not exposed                 |
| MM113      | MM113_1   | CD138+      | NDMM (not treated)  | Male   | 58                    | 58               | IgG                          | kappa                        | 3   | Not exposed                               | Not exposed                      | Not exposed                 |
|            | MM113_2   | CD138+      | RRMM                |        | 59                    |                  |                              |                              |     | Exposed                                   | Exposed                          | Exposed                     |
| MM114      | MM114     | CD138+      | NDMM (<30d treated) | Female | 61                    | 61               | not detected                 | kappa                        | 2   | Not exposed                               | Not exposed                      | Not exposed                 |
| MM115      | MM115     | CD138+      | NDMM (<30d treated) | Female | 59                    | 59               | not detected                 | not detected                 | 2   | Not exposed                               | Not exposed                      | Not exposed                 |
| MM116      | MM116     | CD138+      | NDMM (not treated)  | Female | 55                    | 55               | not detected                 | kappa                        | 2   | Not exposed                               | Not exposed                      | Not exposed                 |
| MM117      | MM117_1   | CD138+      | NDMM (not treated)  | Male   | 51                    | 51               | IgG                          | kappa                        | 3   | Not exposed                               | Not exposed                      | Not exposed                 |
|            | MM117_2   | CD138+      | RRMM                |        | 53                    |                  |                              |                              |     | Exposed                                   | Exposed                          | Exposed                     |
| MM118      | MM118     | CD138+      | NDMM (not treated)  | Male   | 63                    | 62               | IgA                          | kappa                        | 2   | Not exposed                               | Not exposed                      | Not exposed                 |
| MM119      | MM119     | CD138+      | NDMM (not treated)  | Female | 75                    | 73               | NA                           | NA                           | NA  | Not exposed                               | Not exposed                      | Not exposed                 |
| MM120      | MM120     | CD138+      | NDMM (<30d treated) | Female | 69                    | 69               | IgG                          | kappa                        | 2   | Not exposed                               | Not exposed                      | Not exposed                 |
| MM121      | MM121     | CD138+      | NDMM (not treated)  | Female | 79                    | 78               | IgG                          | kappa                        | NA  | Not exposed                               | Not exposed                      | Not exposed                 |
| MM122      | MM122     | CD138+      | NDMM (not treated)  | Male   | 68                    | 67               | IgG                          | lambda                       | NA  | Not exposed                               | Not exposed                      | Not exposed                 |
| MM123      | MM123     | CD138+      | NDMM (not treated)  | Female | 61                    | 61               | NA                           | NA                           | 2   | Not exposed                               | Not exposed                      | Not exposed                 |
| MM124      | MM124     | CD138+      | RRMM                | Male   | 76                    | 73               | IgA                          | lambda                       | NA  | Refractory                                | Refractory                       | Refractory                  |
|            |           | BM-MNC      |                     |        |                       |                  |                              |                              |     |                                           |                                  |                             |
| MM125      | MM125     | BM-MNC      | NDMM (not treated)  | Male   | 55                    | 55               | IgG                          | lambda                       | 2   | Not exposed                               | Not exposed                      | Not exposed                 |
| MM126      | MM126     | CD138+      | NDMM (not treated)  | Female | 80                    | 80               | IgG                          | lambda                       | 3   | Not exposed                               | Not exposed                      | Not exposed                 |
| MM127      | MM127     | BM-MNC      | NDMM (not treated)  | Female | 69                    | 69               | not detected                 | kappa                        | 3   | Not exposed                               | Not exposed                      | Not exposed                 |
| MM128      | MM128_1   | CD138+      | NDMM (not treated)  | Male   | 77                    | 77               | IgA                          | kappa                        | 2   | Not exposed                               | Not exposed                      | Not exposed                 |
|            |           | BM-MNC      |                     |        |                       |                  |                              |                              |     |                                           |                                  |                             |

Supplementary Table 1. FIMM dataset patient sample characteristics and sample analysis information (8/15)

| Patient ID | Sample ID | Sample type | Disease stage      | Gender | Age when sample taken | Age at diagnosis | M-component heavy chain type | M-component light chain type | ISS | Clinical sensitivity:        |                                  |                             |
|------------|-----------|-------------|--------------------|--------|-----------------------|------------------|------------------------------|------------------------------|-----|------------------------------|----------------------------------|-----------------------------|
|            |           |             |                    |        |                       |                  |                              |                              |     | Alkylating agents (MEL, CPM) | Clinical sensitivity: Bortezomib | Clinical sensitivity: IMiDs |
| MM128      | MM128_2   | BM-MNC      | RRMM               | Male   | 79                    | 77               | IgA                          | kappa                        | 2   | Not exposed                  | Exposed                          | Refractory                  |
| MM129      | MM129     | CD138+      | RRMM               | Male   | 59                    | 59               | IgA                          | kappa                        | 3   | Refractory                   | Refractory                       | Not exposed                 |
| MM130      | MM130     | CD138+      | RRMM               | Female | 56                    | 51               | IgA                          | lambda                       | NA  | Exposed                      | Exposed                          | Exposed                     |
| MM131      | MM131     | CD138+      | NDMM (not treated) | Male   | 63                    | 63               | IgA                          | lambda                       | 2   | Not exposed                  | Not exposed                      | Not exposed                 |
| MM132      | MM132     | CD138+      | NDMM (not treated) | Male   | 74                    | 68               | ei tutkittu                  | ei tutkittu                  | NA  | Not exposed                  | Not exposed                      | Not exposed                 |
| MM133      | MM133     | CD138+      | NDMM (not treated) | Male   | 75                    | 70               | IgA                          | lambda                       | 1   | Not exposed                  | Not exposed                      | Not exposed                 |
| MM134      | MM134     | CD138+      | NDMM (not treated) | Male   | 50                    | 50               | IgG                          | kappa                        | 3   | Not exposed                  | Not exposed                      | Not exposed                 |
| MM135      | MM135     | CD138+      | RRMM               | Male   | 61                    | 60               | IgA                          | lambda                       | 2   | Exposed                      | Exposed                          | Refractory                  |
|            |           | BM-MNC      |                    |        |                       |                  |                              |                              |     |                              |                                  |                             |
| MM136      | MM136     | CD138+      | RRMM               | Female | 26                    | 26               | not detected                 | kappa                        | 2   | Exposed                      | Exposed                          | Not exposed                 |
| MM137      | MM137     | CD138+      | RRMM               | Male   | 70                    | 68               | NA                           | NA                           | NA  | Refractory                   | Refractory                       | Not exposed                 |
| MM138      | MM138     | CD138+      | NDMM (not treated) | Female | 65                    | 65               | not detected                 | kappa                        | 2   | Not exposed                  | Not exposed                      | Not exposed                 |
| MM139      | MM139     | CD138+      | NDMM (not treated) | Female | 77                    | 77               | IgA                          | kappa                        | 2   | Not exposed                  | Not exposed                      | Not exposed                 |
| MM140      | MM140     | CD138+      | NDMM (not treated) | Male   | 50                    | 50               | IgG                          | kappa                        | 1   | Not exposed                  | Not exposed                      | Not exposed                 |

**Supplementary Table 1. FIMM dataset patient sample characteristics and sample analysis information (9/15)**

| Sample ID | Patient sample characteristics (cytogenetics) |         |          |          |        |                |         |             | Patient sample analysis information |                     |                  |                      |                                               |
|-----------|-----------------------------------------------|---------|----------|----------|--------|----------------|---------|-------------|-------------------------------------|---------------------|------------------|----------------------|-----------------------------------------------|
|           | t(11;14)                                      | t(4;14) | t(14;16) | t(14;20) | del17p | del(13q) / -13 | 1q gain | No findings | RNA sequencing                      | LC-MS/MS Proteomics | Exome sequencing | Copy number analysis | Flow cytometry-based drug sensitivity testing |
| MM001     | 0                                             | 1       | 0        | 0        | 1      | 1              | 1       | 0           | 0                                   | 0                   | 1                | 1                    | 0                                             |
| MM002_1   | 0                                             | 0       | 0        | 0        | 1      | 0              | 0       | 0           | 1                                   | 0                   | 1                | 1                    | 0                                             |
| MM002_2   | 0                                             | 0       | 0        | 0        | 1      | 0              | 0       | 0           | 1                                   | 0                   | 1                | 1                    | 0                                             |
| MM002_3   | 0                                             | 0       | 0        | 0        | 1      | 0              | 0       | 0           | 1                                   | 0                   | 1                | 1                    | 0                                             |
| MM003     | 0                                             | 1       | 0        | 0        | 0      | 0              | 0       | 0           | 1                                   | 1                   | 1                | 1                    | 0                                             |
| MM004     | 0                                             | 0       | 0        | 0        | 1      | 1              | 0       | 0           | 0                                   | 0                   | 1                | 1                    | 0                                             |
| MM005     | 0                                             | 0       | 0        | 1        | 0      | 0              | 1       | 0           | 1                                   | 0                   | 1                | 1                    | 0                                             |
| MM006     | 0                                             | 0       | 1        | 0        | 1      | 1              | 1       | 0           | 1                                   | 0                   | 1                | 1                    | 0                                             |
| MM007     | 1                                             | 0       | 0        | 0        | 0      | 1              | 1       | 0           | 1                                   | 1                   | 1                | 1                    | 0                                             |
| MM008     | 1                                             | 0       | 0        | 0        | 0      | 0              | 0       | 0           | 0                                   | 0                   | 0                | 0                    | 1                                             |
| MM009     | 1                                             | 0       | 0        | 0        | 0      | 0              | 0       | 0           | 1                                   | 0                   | 1                | 1                    | 0                                             |
| MM010     | 0                                             | 0       | 0        | 0        | 0      | 1              | 0       | 1           | 0                                   | 0                   | 1                | 1                    | 0                                             |
| MM011     | 0                                             | 0       | 0        | 0        | 1      | 0              | 1       | 0           | 1                                   | 0                   | 0                | 0                    | 1                                             |
| MM012     | 1                                             | 0       | 0        | 0        | 0      | 1              | 1       | 0           | 1                                   | 1                   | 1                | 1                    | 0                                             |
| MM013     | 1                                             | 0       | 0        | 0        | 1      | 1              | 1       | 0           | 0                                   | 0                   | 0                | 0                    | 1                                             |
| MM014_1   | 0                                             | 1       | 0        | 0        | 0      | 1              | 1       | 0           | 0                                   | 0                   | 1                | 1                    | 0                                             |
| MM014_2   | 0                                             | 1       | 0        | 0        | 0      | 1              | 1       | 0           | 1                                   | 0                   | 1                | 1                    | 0                                             |
| MM014_3   | 0                                             | 1       | 0        | 0        | 0      | 1              | 1       | 0           | 0                                   | 0                   | 1                | 1                    | 0                                             |
| MM014_4   | 0                                             | 1       | 0        | 0        | 0      | 1              | 1       | 0           | 1                                   | 0                   | 1                | 1                    | 0                                             |
| MM015     | 0                                             | 0       | 0        | 0        | 0      | 1              | 0       | 0           | 0                                   | 0                   | 1                | 1                    | 0                                             |
| MM016     | 0                                             | 1       | 0        | 0        | 0      | 1              | 1       | 0           | 0                                   | 0                   | 1                | 1                    | 0                                             |
| MM017_1   | 0                                             | 0       | 0        | 0        | 0      | 1              | 1       | 0           | 1                                   | 0                   | 1                | 1                    | 0                                             |
| MM017_2   | 0                                             | 0       | 0        | 0        | 0      | 1              | 1       | 0           | 1                                   | 0                   | 1                | 1                    | 0                                             |
| MM017_3   | 0                                             | 0       | 0        | 0        | 0      | 1              | 1       | 0           | 1                                   | 0                   | 1                | 1                    | 0                                             |
| MM018     | 1                                             | 0       | 0        | 0        | 0      | 1              | 1       | 0           | 1                                   | 0                   | 0                | 0                    | 0                                             |
| MM019     | 0                                             | 0       | 0        | 0        | 0      | 0              | 0       | 0           | 1                                   | 0                   | 1                | 1                    | 0                                             |
| MM020     | 0                                             | 0       | 0        | 0        | 0      | 0              | 1       | 0           | 1                                   | 1                   | 1                | 1                    | 0                                             |

**Supplementary Table 1. FIMM dataset patient sample characteristics and sample analysis information (10/15)**

| Sample ID | t(11;14) | t(4;14) | t(14;16) | t(14;20) | del17p | del(13q) / -13 | 1q gain | No findings | RNA        | LC-MS/MS   | Exome      | Copy            | Flow                                     |
|-----------|----------|---------|----------|----------|--------|----------------|---------|-------------|------------|------------|------------|-----------------|------------------------------------------|
|           |          |         |          |          |        |                |         |             | sequencing | Proteomics | sequencing | number analysis | cytometry-based drug sensitivity testing |
| MM021     | 0        | 1       | 0        | 0        | 0      | 0              | 1       | 0           | 0          | 0          | 0          | 0               | 1                                        |
| MM022_1   | 0        | 0       | 0        | 0        | 0      | 1              | 0       | 0           | 1          | 0          | 1          | 1               | 0                                        |
| MM022_2   | 0        | 0       | 0        | 0        | 1      | 1              | 1       | 0           | 0          | 0          | 1          | 1               | 0                                        |
| MM022_3   | 0        | 0       | 0        | 0        | 1      | 1              | 1       | 0           | 1          | 0          | 1          | 1               | 0                                        |
| MM023     | 0        | 0       | 0        | 0        | 0      | 0              | 0       | 0           | 0          | 0          | 1          | 1               | 0                                        |
| MM024     | 0        | 0       | 0        | 0        | 0      | 0              | 0       | 0           | 1          | 0          | 1          | 1               | 0                                        |
| MM025_1   | 0        | 0       | 0        | 0        | 1      | 0              | 1       | 0           | 1          | 1          | 1          | 1               | 0                                        |
|           |          |         |          |          |        |                |         |             | 0          | 0          | 0          | 0               | 1                                        |
| MM025_2   | 0        | 0       | 0        | 0        | 1      | 0              | 1       | 0           | 0          | 0          | 1          | 1               | 0                                        |
| MM026     | 0        | 0       | 0        | 0        | 0      | 1              | 1       | 0           | 1          | 0          | 1          | 1               | 0                                        |
| MM027     | 0        | 0       | 0        | 0        | 0      | 0              | 1       | 0           | 1          | 0          | 1          | 1               | 0                                        |
| MM028     | 1        | 0       | 0        | 0        | 0      | 0              | 0       | 0           | 1          | 0          | 1          | 1               | 0                                        |
| MM029     | 1        | 0       | 0        | 0        | 0      | 0              | 1       | 0           | 0          | 0          | 1          | 1               | 0                                        |
| MM030_1   | 0        | 0       | 0        | 0        | 0      | 1              | 1       | 0           | 1          | 1          | 1          | 1               | 0                                        |
| MM030_2   | 0        | 0       | 0        | 0        | 0      | 1              | 1       | 0           | 1          | 0          | 1          | 1               | 0                                        |
| MM031_2   | 1        | 0       | 0        | 0        | 0      | 0              | 0       | 0           | 1          | 0          | 1          | 1               | 0                                        |
| MM032_1   | 0        | 0       | 0        | 0        | 0      | 0              | 0       | 0           | 1          | 1          | 1          | 1               | 0                                        |
| MM032_2   | 0        | 0       | 0        | 0        | 0      | 0              | 0       | 0           | 0          | 0          | 1          | 1               | 0                                        |
| MM033_1   | 0        | 0       | 0        | 0        | 0      | 1              | 1       | 0           | 1          | 0          | 1          | 1               | 0                                        |
| MM033_2   | 0        | 0       | 0        | 0        | 0      | 1              | 1       | 0           | 1          | 1          | 1          | 1               | 0                                        |
| MM033_3   | 0        | 0       | 0        | 0        | 0      | 1              | 1       | 0           | 0          | 0          | 1          | 1               | 0                                        |
| MM033_4   | 0        | 0       | 0        | 0        | 1      | 1              | 1       | 0           | 1          | 0          | 1          | 1               | 0                                        |
| MM034_1   | 0        | 0       | 0        | 0        | 0      | 0              | 0       | 0           | 1          | 0          | 1          | 1               | 0                                        |
| MM034_2   | 0        | 0       | 0        | 0        | 0      | 0              | 0       | 0           | 1          | 0          | 1          | 1               | 0                                        |
| MM035     | 0        | 1       | 0        | 0        | 0      | 1              | 1       | 0           | 0          | 0          | 1          | 1               | 0                                        |
| MM036_1   | 0        | 0       | 0        | 0        | 0      | 0              | 1       | 0           | 1          | 0          | 1          | 1               | 0                                        |
| MM036_2   | 0        | 0       | 0        | 0        | 0      | 0              | 1       | 0           | 1          | 0          | 1          | 1               | 0                                        |
| MM037     | 0        | 0       | 0        | 1        | 1      | 1              | 1       | 0           | 1          | 0          | 1          | 1               | 0                                        |
|           |          |         |          |          |        |                |         |             | 0          | 0          | 0          | 0               | 1                                        |



**Supplementary Table 1. FIMM dataset patient sample characteristics and sample analysis information (11/15)**

| Sample ID | t(11;14) | t(4;14) | t(14;16) | t(14;20) | del17p | del(13q) / -13 | 1q gain | No findings | RNA        | LC-MS/MS   | Exome      | Copy            | Flow                                     |
|-----------|----------|---------|----------|----------|--------|----------------|---------|-------------|------------|------------|------------|-----------------|------------------------------------------|
|           |          |         |          |          |        |                |         |             | sequencing | Proteomics | sequencing | number analysis | cytometry-based drug sensitivity testing |
| MM038     | 0        | 0       | 0        | 0        | 1      | 1              | 1       | 0           | 1          | 0          | 1          | 1               | 0                                        |
| MM039     | 0        | 0       | 0        | 0        | 0      | 0              | 0       | 0           | 1          | 0          | 1          | 1               | 0                                        |
| MM040     | 0        | 0       | 1        | 0        | 1      | 1              | 1       | 0           | 0          | 0          | 1          | 1               | 0                                        |
| MM041     | 1        | 0       | 0        | 0        | 1      | 0              | 0       | 0           | 1          | 1          | 1          | 1               | 0                                        |
| MM042     | 0        | 0       | 0        | 0        | 1      | 0              | 0       | 0           | 1          | 0          | 1          | 1               | 0                                        |
| MM043_1   | 1        | 0       | 0        | 0        | 0      | 0              | 0       | 0           | 1          | 1          | 1          | 1               | 0                                        |
| MM043_2   | 1        | 0       | 0        | 0        | 1      | 1              | 1       | 0           | 1          | 0          | 1          | 1               | 0                                        |
| MM044     | 0        | 1       | 0        | 0        | 0      | 0              | 0       | 0           | 1          | 0          | 1          | 1               | 0                                        |
| MM045     | 0        | 0       | 0        | 0        | 0      | 1              | 0       | 0           | 1          | 1          | 1          | 1               | 0                                        |
| MM046_1   | 0        | 0       | 0        | 0        | 0      | 0              | 0       | 0           | 1          | 1          | 1          | 1               | 0                                        |
| MM046_2   | 0        | 0       | 1        | 0        | 0      | 0              | 0       | 0           | 1          | 0          | 1          | 1               | 0                                        |
| MM047     | 0        | 0       | 0        | 0        | 1      | 0              | 0       | 0           | 0          | 0          | 1          | 1               | 0                                        |
| MM048_1   | 0        | 0       | 0        | 0        | 0      | 0              | 0       | 0           | 0          | 0          | 1          | 1               | 0                                        |
| MM048_2   | 0        | 0       | 0        | 0        | 0      | 0              | 0       | 0           | 1          | 0          | 1          | 1               | 0                                        |
| MM049     | 0        | 0       | 0        | 0        | 0      | 1              | 0       | 0           | 1          | 0          | 1          | 1               | 0                                        |
| MM050     | 0        | 1       | 0        | 0        | 0      | 1              | 1       | 0           | 1          | 0          | 1          | 1               | 0                                        |
| MM051_1   | 0        | 1       | 0        | 0        | 0      | 1              | 1       | 0           | 1          | 0          | 1          | 1               | 0                                        |
| MM051_2   | 0        | 1       | 0        | 0        | 0      | 0              | 0       | 0           | 1          | 0          | 1          | 1               | 0                                        |
| MM052_1   | 1        | 0       | 0        | 0        | 0      | 0              | 1       | 0           | 0          | 0          | 1          | 1               | 0                                        |
| MM052_2   | 1        | 0       | 0        | 0        | 0      | 0              | 1       | 0           | 0          | 0          | 1          | 1               | 0                                        |
| MM053     | 0        | 0       | 0        | 0        | 0      | 1              | 0       | 0           | 1          | 0          | 1          | 1               | 0                                        |
| MM054     | 0        | 1       | 0        | 0        | 0      | 1              | 1       | 0           | 1          | 0          | 1          | 1               | 0                                        |
| MM055     | 0        | 0       | 0        | 0        | 0      | 1              | 0       | 0           | 0          | 0          | 1          | 1               | 0                                        |
| MM056_1   | 0        | 0       | 0        | 0        | 0      | 1              | 1       | 0           | 1          | 0          | 1          | 1               | 0                                        |
| MM056_2   | 0        | 0       | 0        | 0        | 0      | 0              | 1       | 0           | 1          | 1          | 1          | 1               | 0                                        |
| MM057_1   | 0        | 0       | 0        | 0        | 0      | 0              | 1       | 0           | 1          | 1          | 1          | 1               | 0                                        |
| MM057_2   | 0        | 0       | 0        | 0        | 0      | 0              | 1       | 0           | 1          | 0          | 1          | 1               | 0                                        |
| MM057_3   | 0        | 0       | 0        | 0        | 0      | 0              | 0       | 0           | 1          | 0          | 1          | 1               | 0                                        |
| MM057_4   | 0        | 0       | 0        | 0        | 0      | 0              | 1       | 0           | 1          | 0          | 1          | 1               | 0                                        |
| MM057_5   | 0        | 0       | 0        | 0        | 0      | 0              | 1       | 0           | 1          | 0          | 1          | 1               | 0                                        |

Supplementary Table 1. FIMM dataset patient sample characteristics and sample analysis information (12/15)

| Sample ID | t(11;14) | t(4;14) | t(14;16) | t(14;20) | del17p | del(13q) / -13 | 1q gain | No findings | RNA        | LC-MS/MS   | Exome      | Copy            | Flow                                     |
|-----------|----------|---------|----------|----------|--------|----------------|---------|-------------|------------|------------|------------|-----------------|------------------------------------------|
|           |          |         |          |          |        |                |         |             | sequencing | Proteomics | sequencing | number analysis | cytometry-based drug sensitivity testing |
| MM057_6   | 0        | 0       | 0        | 0        | 0      | 0              | 1       | 0           | 1          | 0          | 1          | 1               | 0                                        |
| MM058_1   | 0        | 1       | 0        | 0        | 0      | 0              | 1       | 0           | 1          | 0          | 1          | 1               | 0                                        |
| MM058_2   | 0        | 1       | 0        | 0        | 0      | 0              | 1       | 0           | 0          | 0          | 1          | 1               | 0                                        |
| MM059     | 0        | 1       | 0        | 0        | 0      | 1              | 1       | 0           | 1          | 0          | 1          | 1               | 0                                        |
| MM060     | 0        | 0       | 0        | 0        | 0      | 1              | 1       | 0           | 1          | 0          | 1          | 1               | 0                                        |
| MM061_1   | 0        | 1       | 0        | 0        | 0      | 1              | 1       | 0           | 1          | 0          | 1          | 1               | 0                                        |
| MM061_2   | 0        | 1       | 0        | 0        | 1      | 1              | 1       | 0           | 0          | 0          | 1          | 1               | 0                                        |
| MM062     | 0        | 0       | 0        | 0        | 0      | 0              | 0       | 1           | 0          | 0          | 1          | 1               | 0                                        |
| MM063     | 0        | 0       | 0        | 0        | 0      | 1              | 0       | 0           | 1          | 0          | 1          | 1               | 0                                        |
| MM064     | 0        | 0       | 0        | 0        | 0      | 1              | 0       | 0           | 1          | 1          | 1          | 1               | 0                                        |
| MM065     | 0        | 0       | 0        | 0        | 1      | 0              | 1       | 0           | 1          | 1          | 1          | 1               | 0                                        |
| MM066     | 0        | 0       | 0        | 0        | 0      | 1              | 1       | 0           | 1          | 1          | 1          | 1               | 0                                        |
| MM067     | 0        | 0       | 0        | 0        | 0      | 0              | 0       | 0           | 1          | 1          | 1          | 1               | 0                                        |
| MM068_1   | 1        | 0       | 0        | 0        | 0      | 1              | 0       | 0           | 1          | 0          | 1          | 1               | 0                                        |
| MM068_2   | 1        | 0       | 0        | 0        | 0      | 1              | 0       | 0           | 1          | 0          | 1          | 1               | 0                                        |
| MM069     | 0        | 0       | 0        | 0        | 1      | 0              | 0       | 0           | 0          | 0          | 1          | 1               | 0                                        |
| MM070     | 0        | 0       | 0        | 0        | 0      | 1              | 0       | 0           | 1          | 1          | 1          | 1               | 0                                        |
| MM071     | 0        | 0       | 0        | 0        | 0      | 1              | 1       | 0           | 1          | 0          | 1          | 1               | 0                                        |
| MM072     | 0        | 0       | 0        | 0        | 0      | 1              | 0       | 0           | 0          | 0          | 1          | 1               | 0                                        |
| MM073     | 0        | 0       | 0        | 0        | 1      | 0              | 0       | 0           | 0          | 0          | 1          | 1               | 0                                        |
| MM074     | 1        | 0       | 0        | 0        | 0      | 1              | 0       | 0           | 1          | 1          | 1          | 1               | 0                                        |
| MM075     | 0        | 0       | 0        | 0        | 0      | 0              | 0       | 0           | 1          | 1          | 1          | 1               | 0                                        |
| MM076     | 0        | 0       | 0        | 0        | 0      | 0              | 0       | 0           | 0          | 0          | 1          | 1               | 0                                        |
| MM077     | 0        | 1       | 0        | 0        | 1      | 1              | 1       | 0           | 0          | 0          | 1          | 1               | 0                                        |
| MM078_1   | 0        | 0       | 0        | 0        | 0      | 0              | 0       | 0           | 1          | 1          | 1          | 1               | 0                                        |
| MM078_2   | 0        | 0       | 0        | 0        | 0      | 0              | 0       | 0           | 0          | 0          | 1          | 1               | 0                                        |
| MM079     | 0        | 0       | 0        | 0        | 0      | 0              | 0       | 0           | 0          | 0          | 1          | 1               | 0                                        |
| MM080     | 0        | 0       | 0        | 0        | 0      | 0              | 0       | 0           | 1          | 0          | 1          | 1               | 0                                        |
| MM081     | 0        | 1       | 0        | 0        | 1      | 1              | 1       | 0           | 1          | 0          | 1          | 1               | 0                                        |
| MM082     | 0        | 0       | 0        | 0        | 0      | 0              | 0       | 0           | 1          | 0          | 1          | 1               | 0                                        |
|           |          |         |          |          |        |                |         |             | 0          | 0          | 0          | 0               | 1                                        |

**Supplementary Table 1. FIMM dataset patient sample characteristics and sample analysis information (13/15)**

| Sample ID | t(11;14) | t(4;14) | t(14;16) | t(14;20) | del17p | del(13q) / -13 | 1q gain | No findings | RNA        | LC-MS/MS   | Exome      | Copy            | Flow                                     |
|-----------|----------|---------|----------|----------|--------|----------------|---------|-------------|------------|------------|------------|-----------------|------------------------------------------|
|           |          |         |          |          |        |                |         |             | sequencing | Proteomics | sequencing | number analysis | cytometry-based drug sensitivity testing |
| MM083_1   | 0        | 0       | 0        | 0        | 0      | 0              | 0       | 1           | 0          | 0          | 1          | 1               | 0                                        |
| MM083_2   | 0        | 0       | 0        | 0        | 0      | 0              | 0       | 1           | 0          | 0          | 1          | 1               | 0                                        |
| MM084     | 0        | 0       | 0        | 0        | 0      | 1              | 0       | 0           | 0          | 0          | 1          | 1               | 0                                        |
| MM085     | 0        | 0       | 0        | 0        | 0      | 1              | 0       | 0           | 1          | 0          | 1          | 1               | 0                                        |
| MM086     | 1        | 0       | 0        | 0        | 1      | 1              | 0       | 0           | 1          | 0          | 1          | 1               | 0                                        |
| MM087     | 0        | 0       | 0        | 0        | 0      | 1              | 1       | 0           | 1          | 0          | 1          | 1               | 0                                        |
|           |          |         |          |          |        |                |         |             | 0          | 0          | 0          | 0               | 1                                        |
| MM088     | 0        | 0       | 0        | 0        | 0      | 1              | 0       | 0           | 1          | 0          | 1          | 1               | 0                                        |
| MM089     | 1        | 0       | 0        | 0        | 0      | 0              | 0       | 0           | 1          | 0          | 1          | 1               | 0                                        |
| MM090     | 1        | 0       | 0        | 0        | 0      | 1              | 0       | 0           | 1          | 0          | 1          | 1               | 0                                        |
| MM091     | 0        | 0       | 0        | 0        | 0      | 1              | 1       | 0           | 1          | 0          | 1          | 1               | 0                                        |
| MM092     | 1        | 0       | 0        | 0        | 0      | 0              | 0       | 0           | 0          | 0          | 1          | 1               | 0                                        |
| MM093     | 0        | 0       | 0        | 0        | 0      | 1              | 0       | 0           | 1          | 0          | 1          | 1               | 0                                        |
| MM094     | 0        | 0       | 0        | 0        | 0      | 0              | 0       | 0           | 1          | 0          | 1          | 1               | 0                                        |
| MM095     | 1        | 0       | 0        | 0        | 1      | 1              | 1       | 0           | 1          | 1          | 1          | 1               | 0                                        |
| MM096     | 1        | 0       | 0        | 0        | 0      | 1              | 0       | 0           | 1          | 0          | 1          | 1               | 0                                        |
| MM097     | 0        | 0       | 0        | 0        | 0      | 0              | 1       | 0           | 0          | 0          | 1          | 1               | 0                                        |
| MM098     | 0        | 0       | 0        | 0        | 1      | 0              | 1       | 0           | 1          | 0          | 1          | 1               | 0                                        |
| MM099     | 0        | 1       | 0        | 0        | 1      | 1              | 0       | 0           | 0          | 0          | 1          | 1               | 0                                        |
| MM100     | 1        | 0       | 0        | 0        | 0      | 1              | 0       | 0           | 0          | 0          | 1          | 1               | 0                                        |
| MM101     | 0        | 0       | 0        | 0        | 0      | 1              | 1       | 0           | 1          | 0          | 1          | 1               | 0                                        |
| MM102     | 0        | 0       | 0        | 0        | 0      | 0              | 1       | 0           | 1          | 0          | 1          | 1               | 0                                        |
| MM103     | 0        | 0       | 0        | 0        | 0      | 1              | 0       | 0           | 0          | 0          | 1          | 1               | 0                                        |
| MM104     | 1        | 0       | 0        | 0        | 0      | 1              | 1       | 0           | 0          | 0          | 1          | 1               | 0                                        |
| MM105     | 0        | 0       | 0        | 0        | 0      | 1              | 0       | 0           | 0          | 0          | 1          | 1               | 0                                        |
| MM106     | 0        | 1       | 0        | 0        | 0      | 1              | 1       | 0           | 0          | 0          | 0          | 0               | 1                                        |
| MM107     | 0        | 0       | 0        | 0        | 0      | 0              | 0       | 0           | 0          | 0          | 1          | 1               | 0                                        |
| MM108     | 0        | 1       | 0        | 0        | 0      | 1              | 1       | 0           | 0          | 0          | 1          | 1               | 0                                        |
| MM109     | 0        | 0       | 0        | 0        | 0      | 1              | 0       | 0           | 1          | 0          | 1          | 1               | 0                                        |
| MM110     | 1        | 0       | 0        | 0        | 0      | 1              | 1       | 0           | 0          | 0          | 1          | 1               | 0                                        |

**Supplementary Table 1. FIMM dataset patient sample characteristics and sample analysis information (14/15)**

| Sample ID | t(11;14) | t(4;14) | t(14;16) | t(14;20) | del17p | del(13q) / -13 | 1q gain | No findings | RNA        | LC-MS/MS   | Exome      | Copy            | Flow                                     |
|-----------|----------|---------|----------|----------|--------|----------------|---------|-------------|------------|------------|------------|-----------------|------------------------------------------|
|           |          |         |          |          |        |                |         |             | sequencing | Proteomics | sequencing | number analysis | cytometry-based drug sensitivity testing |
| MM111_1   | 0        | 1       | 0        | 0        | 0      | 1              | 1       | 0           | 1          | 0          | 1          | 1               | 0                                        |
| MM111_2   | 0        | 1       | 0        | 0        | 1      | 1              | 1       | 0           | 1          | 0          | 1          | 1               | 0                                        |
| MM112     | 0        | 0       | 0        | 0        | 0      | 1              | 1       | 0           | 0          | 0          | 0          | 0               | 1                                        |
| MM113_1   | 0        | 0       | 0        | 0        | 0      | 1              | 0       | 0           | 0          | 0          | 1          | 1               | 0                                        |
| MM113_2   | 0        | 0       | 0        | 0        | 0      | 1              | 0       | 0           | 1          | 0          | 1          | 1               | 0                                        |
| MM114     | 0        | 0       | 0        | 0        | 1      | 1              | 1       | 0           | 1          | 0          | 1          | 1               | 0                                        |
| MM115     | 1        | 0       | 0        | 0        | 0      | 1              | 0       | 0           | 1          | 0          | 1          | 1               | 0                                        |
| MM116     | 0        | 0       | 0        | 0        | 0      | 1              | 0       | 0           | 0          | 0          | 1          | 1               | 0                                        |
| MM117_1   | 0        | 1       | 0        | 0        | 0      | 1              | 0       | 0           | 1          | 0          | 1          | 1               | 0                                        |
| MM117_2   | 0        | 1       | 0        | 0        | 0      | 1              | 1       | 0           | 1          | 0          | 1          | 1               | 1                                        |
| MM118     | 0        | 1       | 0        | 0        | 0      | 1              | 1       | 0           | 1          | 0          | 1          | 1               | 0                                        |
| MM119     | 0        | 0       | 1        | 0        | 0      | 1              | 1       | 0           | 1          | 0          | 1          | 1               | 0                                        |
| MM120     | 0        | 0       | 0        | 0        | 0      | 0              | 0       | 0           | 0          | 0          | 1          | 1               | 0                                        |
| MM121     | 1        | 0       | 0        | 0        | 0      | 0              | 1       | 0           | 1          | 0          | 1          | 1               | 0                                        |
| MM122     | 0        | 0       | 0        | 0        | 0      | 0              | 0       | 0           | 1          | 0          | 1          | 1               | 0                                        |
| MM123     | 1        | 0       | 0        | 0        | 0      | 0              | 0       | 0           | 1          | 0          | 1          | 1               | 0                                        |
| MM124     | 1        | 0       | 0        | 0        | 0      | 0              | 1       | 0           | 1          | 0          | 1          | 1               | 0                                        |
|           |          |         |          |          |        |                |         |             | 0          | 0          | 0          | 0               | 1                                        |
| MM125     | 0        | 1       | 0        | 0        | 0      | 1              | 1       | 0           | 0          | 0          | 0          | 0               | 1                                        |
| MM126     | 1        | 0       | 0        | 0        | 0      | 1              | 0       | 0           | 1          | 0          | 1          | 1               | 0                                        |
| MM127     | 0        | 0       | 1        | 0        | 0      | 1              | 1       | 0           | 0          | 0          | 0          | 0               | 1                                        |
| MM128_1   | 0        | 1       | 0        | 0        | 1      | 1              | 0       | 0           | 1          | 0          | 1          | 1               | 0                                        |
|           |          |         |          |          |        |                |         |             | 0          | 0          | 0          | 0               | 1                                        |
| MM128_2   | 0        | 1       | 0        | 0        | 1      | 1              | 0       | 0           | 0          | 0          | 0          | 0               | 1                                        |
| MM129     | 0        | 1       | 0        | 0        | 0      | 1              | 1       | 0           | 1          | 0          | 1          | 1               | 0                                        |
| MM130     | 0        | 0       | 0        | 0        | 0      | 1              | 1       | 0           | 0          | 0          | 1          | 1               | 0                                        |
| MM131     | 1        | 0       | 0        | 0        | 0      | 1              | 0       | 0           | 1          | 0          | 1          | 1               | 0                                        |
| MM132     | 0        | 1       | 0        | 0        | 0      | 0              | 0       | 0           | 1          | 0          | 1          | 1               | 0                                        |
| MM133     | 0        | 1       | 0        | 0        | 0      | 0              | 0       | 0           | 1          | 0          | 1          | 1               | 0                                        |
| MM134     | 0        | 0       | 0        | 0        | 0      | 1              | 1       | 0           | 1          | 0          | 1          | 1               | 0                                        |

**Supplementary Table 1. FIMM dataset patient sample characteristics and sample analysis information (15/15)**

| Sample ID | t(11;14) | t(4;14) | t(14;16) | t(14;20) | del17p | del(13q) / -13 | 1q gain | No findings | RNA sequencing | LC-MS/MS Proteomics | Exome sequencing | Copy number analysis | Flow cytometry-based drug sensitivity testing |
|-----------|----------|---------|----------|----------|--------|----------------|---------|-------------|----------------|---------------------|------------------|----------------------|-----------------------------------------------|
| MM135     | 0        | 0       | 0        | 0        | 1      | 0              | 0       | 0           | 1              | 0                   | 1                | 1                    | 1                                             |
| MM136     | 1        | 0       | 0        | 0        | 0      | 0              | 0       | 0           | 1              | 0                   | 1                | 1                    | 0                                             |
| MM137     | 0        | 1       | 0        | 0        | 0      | 0              | 1       | 0           | 1              | 0                   | 1                | 1                    | 0                                             |
| MM138     | 0        | 0       | 0        | 0        | 0      | 1              | 0       | 0           | 1              | 0                   | 1                | 1                    | 0                                             |
| MM139     | 1        | 0       | 0        | 0        | 0      | 1              | 0       | 0           | 1              | 0                   | 1                | 1                    | 0                                             |
| MM140     | 1        | 0       | 0        | 0        | 0      | 0              | 0       | 0           | 1              | 0                   | 1                | 1                    | 0                                             |

Some of the samples have two different sample types indicated for the same sample. In these samples the CD138+ cells have been selected from the BM-MNCs directly after sampling from the MM patient. The BM-MNCs indicated in the table are from the same sample as the CD138+ cells, but the BM-MNCs have been viably frozen and used later for the *ex vivo* drug sensitivity testing experiments.

BM: bone marrow mononuclear cell; NDMM: newly diagnosed multiple myeloma; RRMM: relapsed/refractory multiple myeloma; ISS: international staging system; MEL: melphalan; CPM: cyclophosphamide IMiD: immunomodulatory drug; LC-MS/MS: liquid chromatography-tandem mass spectrometry.

**Supplementary table S2. List of the 39 annotated aminopeptidase genes in the human genome utilizing the Ensembl and NCBI databases and further confirming the molecular function (gene ontology) of the identified genes. (1/3)**

| Gene symbol | Gene name                              | ENSEMBL ID      | UniProt ID | Protein/peptidase family | Protein cellular compartment             | Aminopeptidase gene expression-based clustering as indicated in Fig. 1 (Cluster no.) | MM poor prognosis indicators (both in FIMM & CoMMpass datasets) | Protein detected with LC-MS/MS in MM patient samples |
|-------------|----------------------------------------|-----------------|------------|--------------------------|------------------------------------------|--------------------------------------------------------------------------------------|-----------------------------------------------------------------|------------------------------------------------------|
| LAP3        | leucine aminopeptidase 3               | ENSG00000002549 | P28838     | M                        | Cytoplasm, Nucleoplasm, Nucleus, Cytosol | 1                                                                                    | 0                                                               | 1                                                    |
| ERAP2       | endoplasmic reticulum aminopeptidase 2 | ENSG00000164308 | Q6P179     | M                        | ER, Cytoplasm                            | 1                                                                                    | 0                                                               | 1                                                    |
| METAP2      | methionyl aminopeptidase 2             | ENSG00000111142 | P50579     | M                        | Cytoplasm                                | 1                                                                                    | 0                                                               | 1                                                    |
| TPP2        | tripeptidyl peptidase 2                | ENSG00000134900 | P29144     | S                        | Nucleus, Cytoplasm                       | 1                                                                                    | 0                                                               | 1                                                    |
| DPP7        | dipeptidyl peptidase 7                 | ENSG00000176978 | Q9UHL4     | S                        | Golgi, Cytosol                           | 1                                                                                    | 0                                                               | 1                                                    |
| ERAP1       | endoplasmic reticulum aminopeptidase 1 | ENSG00000164307 | Q9NZ08     | M                        | ER, Cytosol                              | 1                                                                                    | 0                                                               | 1                                                    |
| LTA4H       | leukotriene a4 hydrolase               | ENSG00000111144 | P09960     | M                        | Cytoplasm, Nucleoplasm, Nucleus, Cytosol | 1                                                                                    | 0                                                               | 1                                                    |
| LNPEP       | leucyl and cystinyl aminopeptidase     | ENSG00000113441 | Q9UIQ6     | M                        | Cytoplasm                                | 1                                                                                    | 0                                                               | 1                                                    |
| XPNPEP1     | X-prolyl aminopeptidase 1              | ENSG00000108039 | Q9NQW7     | M                        | Cytoplasm                                | 2                                                                                    | 1                                                               | 1                                                    |
| METAP1      | methionyl aminopeptidase 1             | ENSG00000164024 | P53582     | M                        | Cytoplasm                                | 2                                                                                    | 0                                                               | 1                                                    |
| DPP3        | dipeptidyl peptidase 3                 | ENSG00000254986 | Q9NY33     | M                        | Cytosol                                  | 2                                                                                    | 1                                                               | 1                                                    |
| DPP8        | dipeptidyl peptidase 8                 | ENSG00000074603 | Q6V1X1     | S                        | Cytoplasm                                | 2                                                                                    | 0                                                               | 0                                                    |
| NPEPPS      | aminopeptidase puromycin sensitive     | ENSG00000141279 | P55786     | M                        | Cytoplasm, Nucleus                       | 2                                                                                    | 0                                                               | 1                                                    |
| BLMH        | bleomycin hydrolase                    | ENSG00000108578 | Q13867     | C                        | Cytoplasm, Nucleus                       | 2                                                                                    | 1                                                               | 1                                                    |
| JMJD7       | jumonji domain containing 7            | ENSG00000243789 | P0C870     | *                        | Nucleus                                  | 2                                                                                    | 0                                                               | 0                                                    |
| RNPEP       | arginyl aminopeptidase                 | ENSG00000176393 | Q9H4A4     | M                        | Plasma membrane, Cytoplasm               | 2                                                                                    | 1                                                               | 1                                                    |
| PGPEP1      | pyroglutamyl-peptidase I               | ENSG00000130517 | Q9NXJ5     | C                        | Cytoplasm                                | 2                                                                                    | 0                                                               | 1                                                    |
| TPP1        | tripeptidyl peptidase 1                | ENSG00000166340 | O14773     | S                        | Golgi, Lysosome, Cytoplasm               | 2                                                                                    | 0                                                               | 1                                                    |

C: cysteine peptidase; M: metallopeptidase; S: serine peptidase; \* Jumonji oxygenase family

**Supplementary table S2. List of the 39 annotated aminopeptidase genes in the human genome utilizing the Ensembl and NCBI databases and further confirming the molecular function (gene ontology) of the identified genes. (2/3)**

| Gene symbol | Gene name                                           | ENSEMBL ID      | UniProt ID | Protein/peptidase family | Protein cellular compartment     | Aminopeptidase gene expression-based clustering as indicated in Fig. 1 (Cluster no.) | MM poor prognosis indicators (both in FIMM & CoMMpass datasets) | Protein detected with LC-MS/MS in MM patient samples |
|-------------|-----------------------------------------------------|-----------------|------------|--------------------------|----------------------------------|--------------------------------------------------------------------------------------|-----------------------------------------------------------------|------------------------------------------------------|
| PEPD        | peptidase D                                         | ENSG00000124299 | P12955     | M                        | Extracellular region or secreted | 2                                                                                    | 0                                                               | 1                                                    |
| DNPEP       | aspartyl aminopeptidase                             | ENSG00000123992 | Q9ULA0     | M                        | Nucleus, Cytosol                 | 2                                                                                    | 0                                                               | 1                                                    |
| DPP9        | dipeptidyl peptidase 9                              | ENSG00000142002 | Q86TI2     | S                        | Cytosol, Nucleus                 | 2                                                                                    | 0                                                               | 0                                                    |
| NPEPL1      | aminopeptidase-like 1                               | ENSG00000215440 | Q8NDH3     | M                        | Nucleus, Cytoplasm               | 3                                                                                    | 0                                                               | 0                                                    |
| METAP1D     | methionyl aminopeptidase type 1D, mitochondrial     | ENSG00000172878 | Q6UB28     | M                        | Mitochondrion                    | 3                                                                                    | 0                                                               | 0                                                    |
| CTSH        | cathepsin H                                         | ENSG00000103811 | P09668     | C                        | Lysosome, Cytoplasm              | 3                                                                                    | 0                                                               | 0                                                    |
| XPNPEP3     | X-prolyl aminopeptidase 3                           | ENSG00000196236 | Q9NQH7     | M                        | Cytoplasm, Mitochondrion         | 3                                                                                    | 0                                                               | 0                                                    |
| RNPEPL1     | aminopeptidase RNPEPL1                              | ENSG00000142327 | Q9HAU8     | M                        | Cytosol                          | 3                                                                                    | 0                                                               | 0                                                    |
| AOPEP       | aminopeptidase O                                    | ENSG00000148120 | Q8N6M6     | M                        | Nucleus, Cytosol                 | 3                                                                                    | 0                                                               | 0                                                    |
| KDM8        | lysine demethylase 8                                | ENSG00000155666 | Q8N371     | *                        | Nucleus, Nucleoplasm, Cytosol    | 3                                                                                    | 0                                                               | 0                                                    |
| ANPEP       | alanyl aminopeptidase, membrane                     | ENSG00000166825 | P15144     | M                        | Extracellular, Cytoplasm         | 4                                                                                    | 0                                                               | 0                                                    |
| ENPEP       | glutamyl aminopeptidase                             | ENSG00000138792 | Q07075     | M                        | Plasma membrane, Cytoplasm       | 4                                                                                    | 0                                                               | 0                                                    |
| DPP4        | dipeptidyl peptidase 4                              | ENSG00000197635 | P27487     | S                        | Many different membranes         | 4                                                                                    | 0                                                               | 0                                                    |
| MMP14       | matrix metallopeptidase 14                          | ENSG00000157227 | P50281     | M                        | Cytoplasm                        | 4                                                                                    | 0                                                               | 0                                                    |
| NAALADL1    | N-acetylated alpha-linked acidic dipeptidase like 1 | ENSG00000168060 | Q9UQQ1     | M                        | Plasma membrane                  | 4                                                                                    | 0                                                               | 0                                                    |
| AMZ1        | archaelysin family metallopeptidase 1               | ENSG00000174945 | Q400G9     | M                        | Cytosol, Nucleus                 | 4                                                                                    | 0                                                               | 0                                                    |
| LVRN        | laeverin                                            | ENSG00000172901 | Q6Q4G3     | M                        | Cytoplasm, Membrane              | 4                                                                                    | 0                                                               | 0                                                    |
| CTSV        | cathepsin V/Cathepsin L2                            | ENSG00000136943 | O60911     | C                        | Lysosome                         | 4                                                                                    | 0                                                               | 0                                                    |

C: cysteine peptidase; M: metallopeptidase; S: serine peptidase; \* Jumonji oxygenase family

**Supplementary table S2. List of the 39 annotated aminopeptidase genes in the human genome utilizing the Ensembl and NCBI databases and further confirming the molecular function (gene ontology) of the identified genes. (3/3)**

| Gene symbol | Gene name                                          | ENSEMBL ID      | UniProt ID | Protein/peptidase family | Protein cellular compartment                      | Aminopeptidase gene expression-based clustering as indicated in Fig. 1 (Cluster no.) | MM poor prognosis indicators (both in FIMM & CoMMpass datasets) | Protein detected with LC-MS/MS in MM patient samples |
|-------------|----------------------------------------------------|-----------------|------------|--------------------------|---------------------------------------------------|--------------------------------------------------------------------------------------|-----------------------------------------------------------------|------------------------------------------------------|
| XPNPEP2     | X-prolyl aminopeptidase 2/Xaa-Pro aminopeptidase 2 | ENSG00000122121 | O43895     | M                        | Extracellular, Plasma membrane, Cytoplasm         | 4                                                                                    | 0                                                               | 0                                                    |
| F11         | coagulation factor XI                              | ENSG00000088926 | P03951     | S                        | Extracellular region or secreted, Plasma membrane | 4                                                                                    | 0                                                               | 0                                                    |
| TRHDE       | thyrotropin releasing hormone degrading enzyme     | ENSG00000072657 | Q9UKU6     | M                        | Membrane, Cytoplasm                               | 4                                                                                    | 0                                                               | 0                                                    |

M: metallopeptidase; S: serine peptidase;



**Supplementary Table S3. List of compounds used in the experiments.**

| <b>Drug name</b>                | <b>Mechanism/Targets</b>                             | <b>Approval status</b> | <b>Supplier</b>          | <b>Supplier Reference</b> | <b>Label name</b> | <b>Solvent</b> | <b>Conc. range (nM)</b> |
|---------------------------------|------------------------------------------------------|------------------------|--------------------------|---------------------------|-------------------|----------------|-------------------------|
| Melflufen                       | Peptide-conjugated nitrogen mustard alkylating agent | Phase 3 clinical trial | Recipharm/ Oncopeptides  |                           |                   | DMSO           | 0.1-100000              |
| Melphalan                       | Nitrogen mustard alkylating agent                    | Approved               | Sigma-Aldrich            | M2011                     | Melphalan         | DMSO           | 0.1-100000              |
| Selinexor                       | XPO1/CRM1 inhibitor                                  | Approved               | Selleck                  | S7252                     | XPOVIO            | DMSO           | 3-3000                  |
| Bortezomib                      | Proteasome inhibitor (26S subunit)                   | Approved               | ChemieTek                | CT-BZ001                  | Bortezomib        | DMSO           | 0.1-1000                |
| 4-hydroperoxy-cyclo-phosphamide | Alkylating agent                                     | Approved               | Santa Cruz Biotechnology | sc-206885                 |                   | DMSO           | 0.1-10000               |
| Tosedostat*                     | Aminopeptidase inhibitor                             | Phase 2 clinical trial | Cayman Chemical          | 23395                     |                   | DMSO           |                         |
| Bestatin*                       | Aminopeptidase inhibitor                             | Phase 3 clinical trial | Sigma-Aldrich            | B8385                     | Ubenimex          | DMSO           |                         |

\* Tosedostat and bestatin were used in the viability assay.

**Supplementary Table S4. Aminopeptidases used in the hydrolysis assay and their incubation buffers.**

| Enzyme  | Provider/cat.nr         | Control substrate    | Incubation buffer; [S]:[E] ratio                                             |
|---------|-------------------------|----------------------|------------------------------------------------------------------------------|
| DPP3    | R&D Systems<br>#8087    | Arg-Arg-AMC          | 50 mM Tris, 150 mM NaCl, 0.02% (w/v) Brij-35, pH 9.0; 1000:1                 |
| XPNPEP1 | R&D Systems<br>#2970-ZN | Lys(Abz)-Pro-Pro-pNA | 50 mM TrisHCl, 250 mM NaCl, 0.5 mM MnCl <sub>2</sub> , pH 8.0; 1000:1        |
| LTA4H   | R&D Systems<br>#4008-ZN | Ala-AMC              | 50 mM TrisHCl, 150 mM NaCl, 10 mM CaCl <sub>2</sub> , pH 7.5; 50:1           |
| LAP3    | Origene #TP309052       | Leu-AMC              | 50 mM Tris, 4 mM MgCl <sub>2</sub> , 1 mM MnCl <sub>2</sub> , pH 8.00; 100:1 |
| DPP7    | R&D Systems<br>#3438-SE | Lys-Pro-AMC          | 5 mM MES in water, pH 6.0; 1000:1                                            |
| RNPEP   | R&D Systems<br>#8089-ZN | H-Arg-AMC            | 50 mM Tris, 100 mM KCl, 1 mM DTT, pH 7.5; 50:1                               |
| ANPEP   | R&D Systems<br>#3815-ZN | Ala-AMC              | 50 mM Tris in dH <sub>2</sub> O; pH 7; 1000:1                                |

Aminopeptidases that hydrolysed melflufen in the *in vitro* assay are highlighted in green

\* Hydrolyzes terminal ester

Cat. Nr: catalogue number; S: substrate; E: enzyme;

Supplementary Table S5. log2(RPKM) expression values for 39 aminopeptidases genes and 17 housekeeping genes in MM patient samples in the FIMM dataset (n = 122) (1/21)

| Gene symbol | Aminopeptidase genes |                 |                 |                 |                 |                 |                 |                 |                 | Gene symbol |
|-------------|----------------------|-----------------|-----------------|-----------------|-----------------|-----------------|-----------------|-----------------|-----------------|-------------|
|             | <i>AMZI</i>          | <i>ANPEP</i>    | <i>LVRN</i>     | <i>BLMH</i>     | <i>AOPEP</i>    | <i>CTSH</i>     | <i>CTSV</i>     | <i>DNPEP</i>    | <i>DPP3</i>     |             |
| Sample_ID   | ENSG00000174945      | ENSG00000166825 | ENSG00000172901 | ENSG00000108578 | ENSG00000148120 | ENSG00000103811 | ENSG00000136943 | ENSG00000123992 | ENSG00000254986 | ENSEMBL ID  |
| MM032_1     | -3.506306653         | 0.307412236     | -1.826946714    | 0.842958268     | -0.673242943    | 1.103550463     | -2.075294876    | 0.468305635     | 1.34453481      |             |
| MM051_1     | -2.914160783         | -0.13637137     | -4.882788911    | 0.547913796     | 0.156128284     | 2.062664107     | -2.375420627    | 2.107968725     | 0.955867401     |             |
| MM053       | -3.195376852         | -2.191713492    | -3.892487248    | 0.619972059     | -1.054516352    | 0.99861052      | -3.944521145    | 2.496171535     | 2.948862407     |             |
| MM056_1     | -3.919011629         | -2.79845111     | 1.081776968     | 1.425332524     | -0.230671856    | 0.494367495     | -3.661424541    | 0.16710151      | 2.626076074     |             |
| MM063       | -3.799589483         | -2.387844013    | -5.253715334    | 1.650001921     | -0.423380476    | -1.350899403    | -5.231400214    | 1.408026565     | 2.569586534     |             |
| MM064       | -5.610572819         | -5.933167474    | -3.883568214    | 2.532869857     | 0.110536808     | -2.543224081    | -4.335641878    | 2.127915064     | 2.666980619     |             |
| MM065       | -0.321244015         | -0.816679226    | -1.401826016    | 1.87124996      | 1.397257198     | 0.687769079     | -2.133067606    | 1.628844758     | 2.602930185     |             |
| MM066       | -4.340517577         | -0.988860198    | -3.625367559    | 1.381516703     | 0.194596581     | 0.435835921     | -9.785925912    | 1.491964481     | 1.898515895     |             |
| MM067       | -2.661007156         | -5.789376563    | -2.938635352    | 2.14389882      | -0.140422222    | -0.716103756    | -3.937588849    | 1.127239802     | 2.191350865     |             |
| MM070       | -1.481081989         | -0.482798163    | -3.723703735    | 2.467822817     | -0.582166741    | 3.664201756     | -4.977662976    | 0.602410557     | 2.464190809     |             |
| MM074       | -2.744287597         | 1.468127166     | -4.705889192    | 0.379947224     | -1.280631392    | 0.835621624     | -4.688565022    | 0.463520606     | 0.692850491     |             |
| MM075       | -5.809964903         | -3.045990303    | -3.237119081    | 2.176747587     | -0.974758236    | -0.463473737    | -6.978432598    | 0.838464451     | 2.81544268      |             |
| MM078_1     | -2.74800672          | -0.25840519     | -4.70252525     | 1.820310496     | -1.7099817      | 3.376316646     | -5.945352198    | 1.109024472     | 2.927913947     |             |
| MM085       | -4.585657725         | -1.662544791    | -3.724696964    | 0.896421763     | -1.172142655    | 0.190175918     | -6.396968836    | -0.075923896    | 1.236833838     |             |
| MM086       | -2.872044691         | -4.651745912    | -3.911745523    | 2.043308583     | 0.031340762     | -1.213035834    | -4.368863139    | 1.737499008     | 2.565862121     |             |
| MM087       | -3.976489833         | -9.990246392    | -5.078790291    | 2.416899268     | -0.906011693    | -0.870323145    | -4.581137161    | 1.270685436     | 2.46876798      |             |
| MM088       | -5.518922878         | -4.004661184    | -4.450757087    | 1.902621962     | -2.224646425    | -1.644769454    | -10.96433121    | -0.473888282    | 1.62233143      |             |
| MM089       | -2.936352388         | -0.83131124     | -1.666893955    | 1.533468418     | -0.214929402    | 3.589966157     | -4.814844678    | -0.054254451    | 0.020177311     |             |
| MM090       | -2.841172501         | -3.241180932    | -3.403883342    | 2.735234856     | 0.863122641     | 2.253797163     | -4.367960947    | 1.072417257     | 1.657137461     |             |
| MM093       | -3.799165462         | 0.451252628     | -2.1011196      | 1.965637299     | -0.771758825    | 0.768122462     | -4.130012285    | 1.15971249      | 1.395665343     |             |
| MM094       | -3.889684056         | -2.190387901    | -2.14052631     | 2.575357366     | 0.977028402     | 0.112086399     | -4.874035811    | 1.429111961     | 2.568052246     |             |
| MM096       | -4.528943032         | -4.295144338    | -5.776287188    | 3.257222647     | -1.596963689    | -1.010926355    | -11.2093714     | 1.06244935      | 1.899852616     |             |
| MM101       | -2.272201483         | -2.382191159    | -2.079961606    | 1.534256973     | 0.993937478     | 0.680512265     | -2.005288477    | 0.758787881     | 2.051797148     |             |
| MM114       | -3.198171408         | -2.308846972    | -5.650056303    | 2.182573608     | 1.004226702     | -0.261458325    | -3.639590459    | 1.523014986     | 2.047589401     |             |
| MM115       | -5.224324131         | -3.159047268    | -4.453140077    | 2.506452479     | -1.054102657    | -0.9832046      | -6.582269624    | 1.261283056     | 2.068351086     |             |
| MM117_1     | -5.684917919         | -4.122040962    | -4.298950232    | 0.578004366     | -1.992548649    | -0.734589203    | -2.0071578      | 0.353103917     | 1.743334317     |             |
| MM118       | -2.43247643          | -0.980005701    | -1.370203279    | 1.879110405     | 0.557649954     | 1.259226305     | -2.295605824    | 1.114478487     | 1.860816105     |             |
| MM119       | 0.115642229          | -4.214477723    | -3.238872397    | 1.113663632     | 0.321855922     | -2.715125007    | -6.415307659    | 0.913619445     | 2.400210414     |             |
| MM121       | -3.802626738         | 0.833575352     | -3.511167153    | 1.107660794     | -0.109903256    | 1.713723467     | -4.839484624    | 0.321255307     | 1.320720069     |             |
| MM122       | -2.220329596         | 1.831655963     | -3.819700183    | 1.451297988     | -1.456458139    | 3.555343881     | -3.322047054    | 0.007762567     | 1.570514624     |             |
| MM123       | -3.597328639         | -0.070141978    | -3.165006518    | 1.752950173     | -0.244488956    | 1.253299741     | -2.964335126    | 1.280406928     | 1.347852019     |             |
| MM126       | -3.384325396         | -0.369538303    | -3.740114199    | 1.431586604     | -0.096423997    | 0.423485533     | -10.20824535    | 1.025124729     | 1.432012765     |             |
| MM128_1     | -3.46319861          | -7.220350215    | -2.662982263    | 1.842349695     | -2.026963709    | 2.474552208     | -6.781769866    | 0.557600245     | 1.599664212     |             |
| MM131       | -5.744634839         | -0.50041434     | -2.982255904    | 0.943363117     | -0.502777193    | -1.151154081    | -10.65952846    | 1.88681812      | 2.707026646     |             |
| MM132       | -5.93488026          | -3.501011558    | -2.829209208    | 0.648271231     | -1.968447622    | -1.17492391     | -5.931106115    | -0.376472667    | 1.014705567     |             |
| MM133       | -3.451539403         | -1.256285753    | -2.475965842    | 0.463157837     | -0.282115077    | 1.637170097     | -1.389646243    | -0.602234043    | 1.208344506     |             |
| MM134       | -3.768989156         | -0.838101851    | -2.949137323    | 0.950117114     | -1.326382999    | 2.003681331     | -5.31349319     | 0.235665816     | 1.601058707     |             |
| MM136       | -4.551728516         | -2.151857147    | -5.22339462     | 1.391629917     | -1.041006028    | -1.049640608    | -10.08329349    | 0.758837065     | 1.882626818     |             |
| MM138       | -4.720041042         | -1.493181298    | -4.869760207    | 1.177902657     | -0.601461273    | 0.555834297     | -4.091086926    | 1.037250318     | 1.932645097     |             |
| MM139       | -4.00145691          | -0.813089645    | -4.770147468    | 1.029703927     | -2.036678571    | 0.406685065     | -6.408009309    | -0.233382689    | 0.915603809     |             |
| MM140       | -3.393175903         | -3.312337103    | -3.052164209    | 1.121202974     | 0.686472287     | -0.680709291    | -4.701352468    | 0.721344293     | 1.256394704     |             |
| MM026       | -4.337040947         | -6.73540311     | -4.257734599    | 1.379652376     | 0.318381006     | 2.028169511     | -3.009757492    | 1.164101911     | 2.62401493      |             |
| MM027       | -2.902040595         | 0.073880019     | -3.461468004    | 1.543833511     | -3.031067618    | 1.810917102     | -10.85255812    | 0.813440815     | 2.994017334     |             |
| MM028       | -2.719187373         | 0.157603454     | -1.799251871    | 1.208933622     | -0.821115091    | 1.983382514     | -4.974601277    | 0.660621448     | 1.281481018     |             |

Supplementary Table S5. log2(RPKM) expression values for 39 aminopeptidases genes and 17 housekeeping genes in MM patient samples in the FIMM dataset (n = 122) (2/21)

| Gene symbol | AMZI            | ANPEP           | LVRN            | BLMH            | AOPEP           | CTSH            | CTSV            | DNPEP           | DPP3            | Gene symbol |
|-------------|-----------------|-----------------|-----------------|-----------------|-----------------|-----------------|-----------------|-----------------|-----------------|-------------|
| Sample_ID   | ENSG00000174945 | ENSG00000166825 | ENSG00000172901 | ENSG00000108578 | ENSG00000148120 | ENSG00000103811 | ENSG00000136943 | ENSG00000123992 | ENSG00000254986 | ENSEMBL ID  |
| MM030_1     | -2.457772665    | -1.016369399    | -3.398184551    | 3.606842928     | 0.825692461     | -0.341967447    | -3.192982315    | 1.528509773     | 2.121567817     |             |
| MM030_2     | -3.453352086    | 2.651257137     | -6.543970739    | 2.266021927     | -0.378381316    | 4.030384623     | -4.500349241    | 0.932876626     | 2.454123401     |             |
| MM031       | -5.648700614    | -6.501809986    | -3.161309527    | 0.857586426     | -1.255282317    | -2.428683777    | -11.09410895    | 0.610166929     | 1.603482345     |             |
| MM033_4     | -2.627882879    | 0.253747926     | -0.942080868    | 2.097575765     | 1.297919867     | 1.107825529     | -4.248224841    | 1.400080164     | 2.036395517     |             |
| MM033_1     | -4.228667625    | -2.190452659    | -4.863057092    | 2.043328036     | 0.996040881     | 1.261764603     | -5.83933515     | 3.085267203     | 3.177526728     |             |
| MM033_2     | -5.429396951    | -2.080245339    | -5.906483951    | 2.244371989     | 0.022843346     | -0.099582805    | -3.881583819    | 1.232244069     | 1.981298732     |             |
| MM034_2     | -1.556902746    | 1.11886743      | -3.836479214    | 0.576564827     | -0.566383021    | 4.778401642     | -5.51265554     | 0.512247546     | 1.908233745     |             |
| MM034_1     | -3.488281566    | 2.150846826     | -4.573362035    | 1.739327759     | -1.947306081    | 2.59827215      | -7.168155154    | 0.76085226      | 2.529964464     |             |
| MM037       | -5.885803055    | -2.468156984    | -3.45001139     | 1.176391608     | -1.191518279    | -0.902901337    | -10.3532377     | 1.332026651     | 1.858207939     |             |
| MM041       | -1.592908107    | -4.219755964    | -4.833308613    | 2.707736034     | -0.636915833    | -1.002881559    | -4.427285959    | 1.909155756     | 2.9220473       |             |
| MM042       | -1.201941693    | 1.543736039     | -2.822017756    | 2.499938478     | -0.906959562    | 1.070963443     | -4.951147303    | 3.272073424     | 3.356238706     |             |
| MM043_1     | -2.855574265    | -2.975189637    | -4.10129525     | 1.928039673     | 0.890177824     | 0.090479486     | -4.414880477    | 1.480249494     | 1.737067646     |             |
| MM043_2     | -4.013043899    | -1.392484414    | -6.113061249    | 2.656749462     | 1.385659746     | 1.302509187     | -0.781030024    | 2.642356483     | 2.852409235     |             |
| MM044       | -3.327014765    | -0.666831341    | -3.416802611    | 1.857044888     | -0.616010791    | -0.007187986    | -3.372055167    | 2.257919034     | 3.215831637     |             |
| MM045       | -1.32251248     | 1.695619792     | -1.619300433    | 2.723368526     | -0.496706384    | 2.327986022     | -3.880257892    | 1.235427294     | 1.726976735     |             |
| MM046_1     | 0.237871261     | 1.977849078     | -0.677149182    | 1.925347426     | 0.253138018     | 0.309828274     | -1.423183252    | 1.470086893     | 2.856491599     |             |
| MM046_2     | 2.64890619      | 1.596061986     | -2.486498843    | 1.883712688     | 0.387431452     | 0.653195743     | -2.44325466     | 1.697932146     | 2.97480913      |             |
| MM048_2     | -5.076462798    | -10.81784709    | -5.241575178    | 2.439312882     | -2.099285039    | -0.716261145    | -4.933399847    | -0.044521385    | 1.788990335     |             |
| MM050       | -3.267319232    | -0.380729455    | -1.544554734    | 1.492619293     | 0.225490533     | 1.487067775     | -1.35851619     | -0.091134148    | 1.089244227     |             |
| MM051_2     | -2.789104112    | 2.372308246     | -3.768012377    | 1.80812473      | 0.48362149      | 1.533796649     | -2.000270084    | 1.168608967     | 1.407503922     |             |
| MM054       | -4.889199279    | -1.10224155     | -5.696236148    | 0.024959178     | -1.768395561    | -0.009696721    | -5.198583019    | 2.034624802     | 2.169492634     |             |
| MM056_2     | -5.018547324    | -3.66189953     | -2.180887954    | 1.980153024     | -0.102837631    | -0.288796737    | -3.78951115     | 1.374314054     | 2.42912743      |             |
| MM057_4     | -2.793624964    | -3.713460449    | -2.559872346    | 3.76640483      | 1.666472538     | -0.818074895    | -5.983831318    | 2.205064557     | 3.897810958     |             |
| MM057_5     | -4.633626323    | -2.723958921    | -3.490189637    | 2.644675096     | -0.347938082    | -0.503617914    | -10.32345339    | 2.021774059     | 4.014653633     |             |
| MM057_6     | -6.144246724    | -4.634964138    | -1.833985941    | 2.336146953     | -0.410499118    | -1.776058278    | -4.869315784    | 2.018752065     | 4.190837386     |             |
| MM057_1     | -2.081498813    | -1.702523601    | -3.945311443    | 3.716193446     | 1.52994328      | -1.283555409    | -10.04757116    | 2.427104459     | 3.743314007     |             |
| MM057_2     | -1.665299081    | 3.806613873     | -1.973015856    | 2.403646111     | -0.257950604    | 3.448478567     | -3.847476578    | 1.489677251     | 2.980193975     |             |
| MM057_3     | -5.166596609    | -6.788035745    | -2.841814226    | 3.274753359     | -0.195589577    | -1.371413288    | -11.12879594    | 1.886809752     | 4.176800726     |             |
| MM058_1     | -3.673295428    | -1.169499633    | -2.645590276    | 2.845462563     | -0.408206861    | 1.148489733     | -0.373869926    | 2.008667332     | 3.425941495     |             |
| MM059       | -4.820747095    | -4.152740448    | -6.920764446    | 1.823659458     | -0.61497843     | 0.848515965     | -0.977244425    | 0.783378215     | 1.998655609     |             |
| MM060       | -1.171574662    | -1.608664107    | -3.729261517    | 2.181131885     | -1.159576477    | 0.132667839     | -5.841232943    | 1.770419928     | 2.136324137     |             |
| MM061_1     | -4.085275083    | -3.223276687    | -2.673548266    | 0.61968958      | -1.449043562    | -0.604891718    | -2.451529579    | 0.966806293     | 1.828465839     |             |
| MM068_1     | -1.736198503    | -1.797888191    | -3.859093559    | 1.176671583     | -1.156378029    | 1.019665848     | -5.534633144    | 0.86850949      | 1.7074967       |             |
| MM068_2     | -5.467144958    | -2.101925777    | -5.109985489    | 1.414035586     | -1.384733052    | 1.849711756     | -11.71036444    | 0.859730737     | 2.093931211     |             |
| MM091       | -4.391791773    | -3.057274141    | -6.538993954    | 2.022436583     | -0.629206374    | -1.038313902    | -4.662829201    | 1.09271454      | 2.356885238     |             |
| MM095       | -1.655301928    | -1.40858603     | -4.344066774    | 2.055045742     | -0.227630674    | 0.050542527     | -7.546853363    | 1.449307534     | 2.387807375     |             |
| MM002_1     | -4.640271064    | -2.267913187    | -1.894060601    | 1.00234157      | -0.845789485    | -0.626907573    | -2.258635764    | 0.318606887     | 2.407985425     |             |
| MM002_2     | -5.007795199    | -1.215849756    | -4.055724039    | 0.695084953     | -1.446172684    | -1.429394332    | -1.3111759861   | 0.229352609     | 2.503540915     |             |
| MM002_3     | -3.539082215    | -1.957902506    | -4.078044454    | 0.331010608     | -0.788511901    | -1.683439358    | -2.548582586    | -0.090183056    | 2.137663911     |             |
| MM003       | -3.132931423    | -2.388391196    | -3.37897053     | 3.662687767     | 1.094968419     | 0.825355839     | 0.270756971     | 1.2702669       | 2.517658713     |             |
| MM005       | -0.010921177    | -3.995352711    | -2.80964125     | 2.727480725     | -1.503366233    | 2.947741682     | -3.00954993     | 0.851629236     | 3.10721542      |             |
| MM007       | -3.400797361    | -1.51439745     | -5.087025759    | 1.668685534     | -0.41189335     | 0.714858502     | -4.589372629    | 1.043443271     | 2.204490095     |             |
| MM010       | -8.220066943    | -3.853362437    | -3.779304135    | 2.800977587     | -0.341228291    | 0.765129143     | -3.801805211    | 1.812513383     | 3.662839986     |             |
| MM011       | -2.713080946    | -4.00196411     | -4.004930207    | 3.021224175     | 0.447755321     | -3.130185169    | -5.782284125    | 1.802164015     | 3.521012097     |             |

Supplementary Table S5. log2(RPKM) expression values for 39 aminopeptidases genes and 17 housekeeping genes in MM patient samples in the FIMM dataset (n = 122) (3/21)

| Gene symbol | AMZI            | ANPEP           | LVRN            | BLMH            | AOPEP           | CTSH            | CTSV            | DNPEP           | DPP3            | Gene symbol |
|-------------|-----------------|-----------------|-----------------|-----------------|-----------------|-----------------|-----------------|-----------------|-----------------|-------------|
| Sample_ID   | ENSG00000174945 | ENSG00000166825 | ENSG00000172901 | ENSG00000108578 | ENSG00000148120 | ENSG00000103811 | ENSG00000136943 | ENSG00000123992 | ENSG00000254986 | ENSEMBL ID  |
| MM014_4     | -3.520731115    | 0.125056677     | -3.798786555    | 3.263391523     | -0.361042088    | 1.466412297     | 0.496720856     | 1.494986768     | 2.491445922     |             |
| MM014_2     | -3.630625123    | -3.301811538    | -1.877272731    | 2.191817455     | -0.977620087    | -1.08754328     | -2.15352954     | 1.036313171     | 2.061679241     |             |
| MM017_1     | -6.234500811    | -6.109636489    | -4.859738579    | 1.320133351     | -0.292230515    | -0.704977365    | -3.301056016    | 0.971098892     | 2.519362861     |             |
| MM017_2     | -5.943073229    | -2.339014033    | -2.833004627    | 2.225281128     | -0.385268114    | 0.185364604     | -2.789466518    | 1.053795647     | 3.144396212     |             |
| MM017_3     | -4.665769093    | -3.565252127    | -5.557316399    | 3.11225745      | -1.394212239    | -0.592904591    | -1.256436233    | 1.11976234      | 3.089409266     |             |
| MM018       | -3.804876246    | 0.334889423     | -1.390126996    | 1.757365706     | 1.810633236     | 0.309225408     | -0.961350671    | 2.005586293     | 1.837891169     |             |
| MM019       | -3.66114104     | -5.826054289    | -3.35654238     | 1.506092709     | -0.629337557    | -1.024749979    | -1.424428488    | 1.187866255     | 3.505983803     |             |
| MM020       | -0.621181484    | 2.774741819     | -2.686358215    | 2.309097194     | 0.591274806     | 2.009894035     | -2.920462389    | 1.276834572     | 2.716441067     |             |
| MM022_1     | -2.558121529    | -0.986515487    | -3.77117016     | 0.806521076     | 1.410203009     | 0.473014096     | -2.842882676    | 3.549524157     | 2.745016293     |             |
| MM022_3     | -4.775939597    | -6.093811842    | -2.492944266    | -0.328875603    | 0.599965296     | -0.646849956    | -10.12971746    | 1.321874544     | 1.81386834      |             |
| MM024       | -1.624396894    | -2.342372089    | 0.865709003     | 2.373807927     | 1.808996472     | 1.128353381     | 0.477256332     | 1.550375081     | 3.508422499     |             |
| MM025_1     | -5.443130982    | -3.675367893    | -3.221530751    | 1.52311246      | -0.080304909    | 0.410905812     | -5.365742514    | 1.369967403     | 3.211551853     |             |
| MM036_1     | -11.29685702    | -10.77145476    | -2.64390348     | 1.87852254      | -1.249759127    | -3.751373462    | -5.105187693    | 1.117152417     | 1.434346088     |             |
| MM036_2     | -6.553136863    | -6.027734611    | -2.081513092    | 1.700029289     | -1.065110976    | -3.095116151    | -4.132902889    | 1.006112134     | 1.166734468     |             |
| MM038       | -3.860118703    | -1.945492644    | -2.886959759    | 2.334299184     | -1.357718116    | 0.940545421     | -5.048693971    | 1.043515813     | 1.073202184     |             |
| MM039       | -2.288255301    | -1.129864106    | -6.18188994     | 2.807503471     | 0.617899648     | 0.417290808     | -4.703865617    | 1.442701597     | 2.802745678     |             |
| MM049       | -3.711542345    | -5.256529421    | -1.684703416    | 1.576945078     | 0.577485952     | -0.780462364    | -4.356975288    | 1.084020062     | 1.71689492      |             |
| MM071       | -3.485901881    | -3.079307059    | -4.913855676    | 2.184886784     | 0.120410825     | -0.562501928    | -4.552085975    | 1.109241776     | 2.524749692     |             |
| MM080       | -6.113279099    | 0.382446964     | -3.610761319    | 1.619418664     | 1.057469552     | -2.814053273    | -10.58071374    | 1.367802467     | 2.753849078     |             |
| MM081       | -2.723805524    | -2.919687244    | -7.727239606    | 2.285003428     | 0.989394547     | -0.135957005    | 0.453018031     | 2.108004965     | 1.762193736     |             |
| MM082       | -6.430158555    | -8.092383306    | -3.658555661    | 1.753410772     | -1.307224807    | -2.159637224    | -8.04082608     | 0.680094002     | 1.767687732     |             |
| MM098       | -3.591155418    | -1.47286375     | -2.808660487    | 1.754065126     | 0.818756892     | 1.408399256     | -1.059615065    | 1.856228235     | 3.467949983     |             |
| MM102       | -2.653934114    | 2.436604188     | -2.902416512    | 1.3527241       | 0.816489568     | 4.284549322     | -6.315574348    | 0.466850191     | 1.362074903     |             |
| MM109       | -4.041912759    | -0.743749366    | -4.927840992    | 0.933766364     | -0.328184597    | 1.587630831     | -3.161439805    | 1.565625709     | 3.240966075     |             |
| MM111_1     | -5.76072136     | -4.601447007    | -5.181844002    | 1.838778338     | 0.427950463     | -0.819017642    | -0.763293419    | 1.74916236      | 2.866570659     |             |
| MM111_2     | -2.463359112    | -3.684770241    | -4.130866144    | 2.457979054     | 1.78067491      | -0.712422705    | 0.435528461     | 2.466057716     | 2.734507007     |             |
| MM113_2     | -2.480981989    | 2.45861784      | -7.148319149    | 2.729996661     | -0.606261882    | 2.705556693     | -4.736395893    | 0.915201333     | 3.030224954     |             |
| MM117_2     | -4.936492183    | -5.292445435    | -4.516148917    | 1.41386643      | -0.609436462    | -0.795321667    | -2.383780251    | 1.370379172     | 2.838853603     |             |
| MM124       | -6.80593167     | -6.746192991    | -3.429788208    | 1.716296091     | -0.530870975    | -2.365925949    | -11.08695319    | 0.999692363     | 1.879606288     |             |
| MM129       | -3.60592906     | -5.204854943    | -3.155255684    | 3.237420918     | 0.695502925     | 0.843254872     | -0.108903597    | 2.064737255     | 3.003442374     |             |
| MM135       | -3.005417216    | -4.310828859    | -6.600199258    | 4.314405739     | -1.046032375    | 3.423198081     | -7.020083969    | 1.735125493     | 2.70134986      |             |
| MM137       | -5.866753339    | -1.9778565      | -4.670263451    | 0.795104893     | -1.667852279    | 1.000403818     | -3.844556124    | 0.321746338     | 2.423299135     |             |
| MM006       | -4.417870066    | 0.055767662     | -4.793933311    | 0.362596957     | -1.774706285    | -1.793929525    | -5.06330301     | 1.085284126     | 1.345139348     |             |
| MM008       | -0.955058716    | 1.733851623     | -4.384201974    | 1.710508201     | 0.667615943     | 2.337242548     | -2.712654941    | 1.939285179     | 2.150028301     |             |

Supplementary Table S5. log2(RPKM) expression values for 39 aminopeptidases genes and 17 housekeeping genes in MM patient samples in the FIMM dataset (n = 122) (4/21)

| Gene symbol | Aminopeptidase genes |                 |                 |                 |                 |                 |                 |                 |                 | Gene symbol |
|-------------|----------------------|-----------------|-----------------|-----------------|-----------------|-----------------|-----------------|-----------------|-----------------|-------------|
|             | <i>DPP4</i>          | <i>DPP7</i>     | <i>DPP8</i>     | <i>DPP9</i>     | <i>ENPEP</i>    | <i>ERAPI</i>    | <i>ERAP2</i>    | <i>FII</i>      | <i>JMJD7</i>    |             |
| Sample_ID   | ENSG00000197635      | ENSG00000176978 | ENSG00000074603 | ENSG00000142002 | ENSG00000138792 | ENSG00000164307 | ENSG00000164308 | ENSG00000088926 | ENSG00000243789 | ENSEMBL ID  |
| MM032_1     | -0.345841867         | 4.658874835     | 2.073701507     | 0.98362785      | 0.316821745     | 3.64610416      | 5.661564841     | -3.104151463    | 2.158472978     |             |
| MM051_1     | -3.958530548         | 2.246319877     | 1.093776756     | 1.81111536      | -2.342778814    | 3.198410456     | 3.502090059     | -3.497396252    | 2.933521986     |             |
| MM053       | -3.376723131         | 5.699727029     | 0.554206821     | 1.847065192     | -5.169518999    | 3.466637346     | 5.25469558      | -9.57056255     | 3.662422601     |             |
| MM056_1     | -1.984750723         | 4.901526998     | 3.354337055     | 1.323364588     | -1.588905255    | 4.631687804     | 5.851711891     | -1.28144403     | 2.223855745     |             |
| MM063       | -6.593351233         | 4.743562257     | 2.361861101     | 0.023663474     | -2.147707952    | 4.748996524     | 5.158454346     | -10.10646917    | 1.8869719       |             |
| MM064       | -5.002618448         | 3.905095009     | 2.199161227     | 1.4380239       | -8.086724677    | 3.884290794     | 5.204025901     | -10.04298339    | 1.138717895     |             |
| MM065       | -0.628607098         | 4.004203701     | 2.749766657     | 2.191982988     | -0.857140459    | 4.29322544      | 2.456762714     | -1.000582933    | 1.965014503     |             |
| MM066       | -2.143078146         | 4.33972971      | 2.590662497     | 1.544592335     | -2.190679666    | 4.471100458     | 4.986587669     | -5.603003143    | 1.608636839     |             |
| MM067       | -6.295344764         | 5.115266111     | 1.49197505      | 0.872192683     | -4.361199288    | 3.548292953     | 5.132951947     | -7.791389185    | 1.818434396     |             |
| MM070       | -3.184388787         | 3.423768044     | 2.4516495       | 0.78053485      | -2.309535591    | 4.638947591     | 4.683668011     | -10.10988977    | 1.796428106     |             |
| MM074       | 1.170030017          | 3.855198792     | 1.890855308     | 0.802723077     | -5.492811725    | 3.91520709      | 4.953939168     | -4.818011519    | 1.581219594     |             |
| MM075       | -2.166235448         | 4.178431228     | 2.814228677     | 0.866253142     | 0.263954921     | 4.553403115     | 5.990255757     | -10.58341239    | 0.956848863     |             |
| MM078_1     | -4.175597537         | 3.623036511     | 2.343249403     | 1.936969759     | -4.633208008    | 4.669077818     | 4.594110298     | -7.65049615     | 0.218785862     |             |
| MM085       | -4.100560101         | 4.357869554     | 2.091078774     | 0.349609906     | -3.715769032    | 3.464084187     | 3.366505269     | -5.358092437    | 1.074222972     |             |
| MM086       | -3.012672438         | 4.211965362     | 2.810840289     | 2.120971025     | -2.92814373     | 3.970384221     | 6.386172402     | -4.498309636    | 2.214347843     |             |
| MM087       | -2.699634142         | 3.988255377     | 2.414229398     | 1.869008289     | -4.836982393    | 4.513111167     | 5.370042769     | -9.456206115    | 1.592331215     |             |
| MM088       | -1.159860664         | 3.716339645     | 1.827013697     | 0.589618389     | -4.776651217    | 3.675856693     | 4.040663234     | -10.48184816    | 0.575959529     |             |
| MM089       | -2.137319461         | 3.505488649     | 1.947851027     | 0.409562559     | -1.378533744    | 4.181492102     | 4.445638886     | -4.332361627    | 2.271778317     |             |
| MM090       | -2.287088267         | 3.675186286     | 2.528478273     | 0.642087937     | -3.83400212     | 5.28822485      | 5.34030656      | -5.074511721    | 2.260506487     |             |
| MM093       | -2.822377492         | 4.308515567     | 2.345045237     | 1.465712742     | 0.264156438     | 4.48492739      | 5.936855842     | -4.747064908    | 1.246314537     |             |
| MM094       | -3.404586433         | 4.86464691      | 3.060597874     | 1.984256947     | -2.710105625    | 4.878618183     | 4.04004847      | -5.661641923    | 3.062777365     |             |
| MM096       | -4.481054289         | 4.12570487      | 1.559694982     | 1.429153566     | -4.974770353    | 3.530626224     | 4.442537815     | -6.639425504    | 1.314072705     |             |
| MM101       | -2.334026999         | 4.673118203     | 2.727876608     | 1.464687076     | -0.834139405    | 4.265806367     | 4.275338129     | -2.611975935    | 2.473921863     |             |
| MM114       | -5.957960844         | 3.722490733     | 2.189734685     | 0.716977452     | -2.430566785    | 4.216505619     | 4.744090873     | -10.02747213    | 2.205768752     |             |
| MM115       | 0.244731758          | 4.298829337     | 2.17060635      | 0.949889764     | -4.221006617    | 3.85933054      | 5.997944737     | -7.017324413    | 1.917714941     |             |
| MM117_1     | -3.934678227         | 2.663588946     | 1.433740549     | -0.103241358    | -5.013820214    | 3.762892766     | 5.964816204     | -10.4583654     | 0.58551431      |             |
| MM118       | -1.39206958          | 3.147091199     | 2.37801051      | 1.299832047     | 0.82643108      | 3.758049985     | 2.357262727     | -2.449532039    | 2.123962304     |             |
| MM119       | -6.507169513         | 4.49753766      | 1.767603763     | 0.616959326     | -3.641496704    | 3.996973022     | 6.094152699     | -7.698359354    | 1.578305185     |             |
| MM121       | 0.190422485          | 3.593921677     | 1.791348691     | 0.80177472      | -1.442634476    | 3.648537566     | 4.859886142     | -5.700955974    | 1.978109059     |             |
| MM122       | -0.896675498         | 3.841070703     | 1.735596308     | 0.282076292     | -1.305172557    | 3.109794051     | 5.156656462     | -5.014338404    | 1.331820362     |             |
| MM123       | -1.857553163         | 3.844858795     | 1.879967673     | 1.162583176     | -2.234838203    | 3.888846309     | 4.410517384     | -9.196097593    | 2.886332996     |             |
| MM126       | -0.465636159         | 4.031676324     | 1.964828582     | 0.602403095     | -0.723895596    | 4.01954304      | 2.865728676     | -9.725762303    | 1.817802201     |             |
| MM128_1     | -6.873631721         | 2.417758145     | 1.778008221     | 0.350886711     | -4.942204466    | 3.91026546      | 5.234482179     | -4.278225199    | 1.453950041     |             |
| MM131       | -1.202568404         | 3.428514395     | 2.393585685     | 1.580092866     | -2.21828419     | 4.63286983      | 2.963037036     | -10.17704541    | 1.122658634     |             |
| MM132       | -3.054090488         | 3.27892171      | 1.958067652     | -0.176268402    | -0.259537236    | 3.049723286     | 4.452623827     | -3.750892633    | 1.012880414     |             |
| MM133       | -2.809614767         | 2.727016135     | 1.081053435     | 0.366996081     | -0.800381836    | 3.239342002     | 4.115537605     | -3.909631447    | 1.542929108     |             |
| MM134       | -3.516776328         | 3.783518675     | 1.288584042     | 0.102101774     | -3.691887373    | 2.621759408     | 2.583710266     | -6.870538503    | 0.871616195     |             |
| MM136       | -0.641825617         | 3.545645618     | 2.146181448     | 0.950459897     | -3.848692452    | 4.574170412     | 4.800016838     | -6.430885442    | 2.056898181     |             |
| MM138       | -4.288822226         | 4.3908613       | 1.589677005     | 0.44930307      | -1.954198821    | 4.514226906     | 5.962619962     | -7.258857836    | 1.830809369     |             |
| MM139       | -1.10028574          | 3.569169412     | 2.010876321     | 0.438298916     | -3.261745733    | 2.627295944     | 1.744193812     | -6.882457536    | 0.84093407      |             |
| MM140       | -0.954653533         | 3.241281718     | 1.616604723     | 0.315162389     | -5.21435554     | 3.962939508     | 4.980916994     | -9.833579261    | 1.935555796     |             |
| MM026       | -1.752034909         | 4.874659242     | 1.688262068     | 0.407241574     | -1.08780673     | 5.468715872     | 5.999351211     | -10.28882567    | 1.604605157     |             |
| MM027       | -3.237060846         | 4.297837069     | 1.741973829     | 1.013914855     | -11.58374136    | 3.701555407     | 4.245814862     | -10.37007507    | 0.577348006     |             |
| MM028       | 0.265002265          | 3.763858683     | 2.347342317     | 0.589239178     | 2.270677319     | 4.332919961     | 5.130395278     | -6.936903068    | 0.904020389     |             |

Supplementary Table S5. log2(RPKM) expression values for 39 aminopeptidases genes and 17 housekeeping genes in MM patient samples in the FIMM dataset (n = 122) (5/21)

| Gene symbol | <i>DPP4</i>     | <i>DPP7</i>     | <i>DPP8</i>     | <i>DPP9</i>     | <i>ENPEP</i>    | <i>ERAPI</i>    | <i>ERAP2</i>    | <i>FII</i>      | <i>JMJD7</i>    | Gene symbol |
|-------------|-----------------|-----------------|-----------------|-----------------|-----------------|-----------------|-----------------|-----------------|-----------------|-------------|
| Sample_ID   | ENSG00000197635 | ENSG00000176978 | ENSG00000074603 | ENSG00000142002 | ENSG00000138792 | ENSG00000164307 | ENSG00000164308 | ENSG00000088926 | ENSG00000243789 | ENSEMBL_ID  |
| MM030_1     | -1.689115238    | 3.804017395     | 2.080136572     | 1.646539109     | -1.641675773    | 4.351204483     | 4.108653369     | -6.8643046      | 2.334048616     |             |
| MM030_2     | -2.994133095    | 3.429550899     | 1.854993094     | 1.370334359     | -2.142907583    | 3.80528993      | 4.279152976     | -10.20769075    | 1.670122121     |             |
| MM031_2     | -0.530440081    | 3.371308655     | 2.017795746     | -0.279836775    | -2.223521402    | 4.095525053     | 5.705414749     | -7.441700896    | 1.901512304     |             |
| MM033_4     | -5.11060485     | 3.602662504     | 2.777393436     | 1.794118074     | 0.338784072     | 3.309616354     | 2.237813426     | -4.536259944    | 2.545201777     |             |
| MM033_1     | -9.101122007    | 5.696102245     | 2.495458384     | 3.097784539     | -1.690594844    | 4.186549497     | 2.142565824     | -8.526777101    | 3.620055341     |             |
| MM033_2     | -4.730174523    | 4.155991149     | 2.88776793      | 1.398906732     | -1.496157874    | 3.718312404     | 0.740134375     | -9.013810612    | 2.213793733     |             |
| MM034_2     | -1.779675046    | 3.527756703     | 2.227828599     | -0.170771834    | -1.669176034    | 3.724207937     | 4.019497216     | -10.38772449    | 1.276068252     |             |
| MM034_1     | -0.575165277    | 4.748463451     | 2.381181938     | 1.019277988     | -1.919366876    | 4.011897116     | 4.349329107     | -10.77313494    | 1.135746583     |             |
| MM037       | -1.008388009    | 4.499503117     | 1.673462109     | -0.273219283    | -4.37017542     | 2.909748165     | 5.151048535     | -9.870754645    | 1.154342769     |             |
| MM041       | -2.357128011    | 2.873047845     | 2.307322277     | 1.342147046     | -1.738267357    | 4.245060145     | 3.71398936      | -2.344158785    | 1.703869456     |             |
| MM042       | -2.94064744     | 5.086507309     | 1.990792678     | 3.470068787     | -3.503006845    | 4.248824383     | 3.147144487     | -4.855687375    | 2.464236289     |             |
| MM043_1     | -2.800034558    | 4.043958146     | 2.885410008     | 1.39150873      | -0.310787901    | 4.26082636      | 4.808067351     | -5.01646169     | 1.67030914      |             |
| MM043_2     | -2.575564296    | 3.820568478     | 2.523281393     | 2.05394882      | -0.690902809    | 4.274505111     | 4.583654235     | -9.22038791     | 2.336314487     |             |
| MM044       | -3.684605136    | 4.329384437     | 1.793824369     | 2.205478919     | -1.568597492    | 3.364513155     | 3.522569836     | -5.636806045    | 2.638837277     |             |
| MM045       | -0.673870649    | 4.211324416     | 2.835054378     | 1.348136175     | -0.952897501    | 4.314588967     | 4.737098021     | -2.674292476    | 2.46060896      |             |
| MM046_1     | 0.426117069     | 3.978087527     | 2.384024371     | 1.708989605     | -0.158394496    | 4.345380376     | 3.66209073      | -0.632784197    | 2.041017393     |             |
| MM046_2     | -1.776256566    | 3.758739378     | 2.218185675     | 2.098996619     | -1.116822013    | 3.891531085     | 3.34992014      | -1.870749738    | 2.108699969     |             |
| MM048_2     | -1.878012138    | 3.870504665     | 2.028049552     | 1.676612172     | -3.790113971    | 4.016724193     | 4.102192617     | -7.113881808    | 1.28591492      |             |
| MM050       | -2.864098616    | 3.63674115      | 1.869291967     | 0.993802371     | -3.54616965     | 4.276838199     | 5.56600154      | -4.178332427    | 1.544596019     |             |
| MM051_2     | -2.179155001    | 2.129348015     | 2.13620756      | 0.862502194     | 0.535241815     | 4.311108626     | 4.310863964     | -6.027342131    | 1.769970095     |             |
| MM054       | -4.720129149    | 4.517136362     | 1.249808748     | 1.529760907     | -10.97416038    | 2.878549452     | 3.239424001     | -4.268640991    | 1.860160943     |             |
| MM056_2     | -10.80023624    | 6.032833623     | 2.378409058     | 1.654516132     | -11.43955763    | 4.609822754     | 5.344320077     | -2.265889404    | 2.416108597     |             |
| MM057_4     | -7.454204796    | 4.654581389     | 2.486500343     | 1.416296275     | -2.455452345    | 4.999114362     | 4.260961203     | -6.87985989     | 2.396804649     |             |
| MM057_5     | -4.075465238    | 4.756767336     | 1.65271697      | 0.492627244     | -2.76461778     | 4.847979211     | 2.730463627     | -9.840970335    | 1.556901247     |             |
| MM057_6     | -4.961177639    | 4.741936446     | 2.175235275     | 0.210651082     | -2.59803077     | 4.784213699     | 2.258366031     | -10.57665729    | 1.656583588     |             |
| MM057_1     | -4.117065197    | 4.909848346     | 2.803952098     | 1.967213285     | -2.728905848    | 5.209346236     | 4.211073224     | -9.565088104    | 2.649623437     |             |
| MM057_2     | -0.937743414    | 4.185085273     | 2.329053202     | 1.467911233     | 3.480983748     | 4.368180262     | 3.64926902      | -10.18517249    | 1.351777927     |             |
| MM057_3     | -5.387767782    | 4.305408745     | 2.471040929     | 0.464703991     | -1.892752924    | 4.942214444     | 3.161746761     | -10.64631289    | 0.722058468     |             |
| MM058_1     | -2.161158552    | 1.876191124     | 2.616820491     | 1.205208141     | 0.377924047     | 4.034494269     | 4.984397741     | -2.814317481    | 0.688061707     |             |
| MM059       | -4.493911556    | 3.851301097     | 1.793281592     | 1.454547035     | -3.679514975    | 3.351628919     | 5.672150026     | -3.761304566    | 1.178829084     |             |
| MM060       | -4.45122579     | 4.443757307     | 1.57973745      | 0.898497478     | -0.986417637    | 4.470830362     | 4.724058173     | -7.046805885    | 1.346495864     |             |
| MM061_1     | -2.670303547    | 3.516615081     | 0.957474767     | 0.671339921     | -2.748816294    | 2.985063149     | 3.8823857       | -1.462086539    | 1.023510681     |             |
| MM068_1     | -2.194080931    | 3.675499764     | 2.294998047     | 0.740500992     | -1.640927701    | 3.799577692     | 6.45652497      | -10.66685994    | 1.292360584     |             |
| MM068_2     | -0.568007619    | 3.782166845     | 2.446404821     | -0.346082778    | -0.671296757    | 3.431440778     | 5.811062825     | -6.183487272    | 0.726383539     |             |
| MM091       | -6.689596028    | 4.765208798     | 2.497264881     | 1.953327948     | -0.484904022    | 4.215097834     | 4.884943983     | -5.558857773    | 1.805148166     |             |
| MM095       | -1.656355377    | 3.862242875     | 2.657247808     | 1.301937664     | -2.00294676     | 4.47422522      | 4.387001387     | -4.303557975    | 2.043262197     |             |
| MM002_1     | -1.611388347    | 5.326149815     | 1.84699646      | -0.247072531    | -1.071177404    | 3.558230127     | 3.51935412      | -2.83638782     | 1.816177767     |             |
| MM002_2     | -4.189571275    | 5.209150922     | 1.923715678     | 0.351590105     | -2.403665941    | 3.789838207     | 3.240410132     | -5.822821788    | 1.595715236     |             |
| MM002_3     | -2.604930154    | 4.887655445     | 1.907688855     | -0.005705793    | -0.950664591    | 3.661540045     | 3.540023967     | -10.39252902    | 1.758640725     |             |
| MM003       | -2.684709802    | 2.400375963     | 2.676349145     | 2.535752856     | 0.399212778     | 4.629655521     | 3.832340208     | -3.972436988    | 2.654157806     |             |
| MM005       | -2.403849975    | 3.243646423     | 2.602852412     | 1.22375546      | -3.39655227     | 3.81150963      | 1.263632339     | -4.188786578    | 2.084789778     |             |
| MM007       | -5.52923139     | 3.737389736     | 2.858135569     | 0.958731148     | -3.077699347    | 4.339157703     | 4.771657574     | -9.598742674    | 1.724215517     |             |
| MM010       | -6.261038131    | 4.554939615     | 2.345517207     | 1.626940533     | -3.951758671    | 4.323569842     | 5.445809988     | -10.33054942    | 1.363284917     |             |
| MM011       | -5.160450165    | 4.351200628     | 2.718397541     | 1.679426394     | -4.890537016    | 4.06961898      | 4.362344582     | -9.943657264    | 1.934155606     |             |

Supplementary Table S5. log2(RPKM) expression values for 39 aminopeptidases genes and 17 housekeeping genes in MM patient samples in the FIMM dataset (n = 122) (6/21)

| Gene symbol | <i>DPP4</i>     | <i>DPP7</i>     | <i>DPP8</i>     | <i>DPP9</i>     | <i>ENPEP</i>    | <i>ERAP1</i>    | <i>ERAP2</i>    | <i>FII</i>      | <i>JMJD7</i>    | Gene symbol |
|-------------|-----------------|-----------------|-----------------|-----------------|-----------------|-----------------|-----------------|-----------------|-----------------|-------------|
| Sample_ID   | ENSG00000197635 | ENSG00000176978 | ENSG00000074603 | ENSG00000142002 | ENSG00000138792 | ENSG00000164307 | ENSG00000164308 | ENSG00000088926 | ENSG00000243789 | ENSEMBL ID  |
| MM014_4     | -2.381344921    | 4.247705836     | 3.025418264     | 2.277020471     | -0.521354748    | 4.028053896     | 4.740927431     | -4.62211138     | 1.325852716     |             |
| MM014_2     | -3.569783529    | 4.154897506     | 2.606881729     | 1.352862876     | -0.124546344    | 3.802203619     | 5.145267123     | -2.464923907    | 1.223989396     |             |
| MM017_1     | -5.436245302    | 4.420959932     | 2.245519052     | 0.636154358     | -0.770450318    | 4.895082447     | 1.805864929     | -7.049527399    | 1.840086871     |             |
| MM017_2     | -1.868873375    | 4.227223705     | 2.482366943     | 1.194760584     | -0.071871001    | 4.936007423     | 3.430278808     | -2.97342737     | 1.89459815      |             |
| MM017_3     | -5.151525124    | 4.009473175     | 2.946616994     | 1.674294298     | 0.602157746     | 4.842910494     | -0.821570088    | -9.221036408    | 0.944676216     |             |
| MM018       | -0.396014208    | 3.920833947     | 2.284446564     | 1.625870393     | 0.502644239     | 3.957970026     | 3.236022739     | -0.658969626    | 3.028465791     |             |
| MM019       | -3.691584517    | 5.690414763     | 2.311201177     | 0.810020477     | -2.961359788    | 3.938836965     | 1.825884986     | -3.927017195    | 2.570871648     |             |
| MM020       | -0.496127328    | 4.760214793     | 3.958198595     | 1.186865631     | -2.274467675    | 3.975012267     | 4.334070467     | -4.477507702    | 2.565147613     |             |
| MM022_1     | -0.946426336    | 6.481668905     | 2.517636443     | 2.504363922     | -0.186928734    | 4.518392899     | 3.85599496      | -8.899558436    | 2.986084548     |             |
| MM022_3     | -4.606869468    | 4.491132379     | 1.876465952     | 0.789238524     | -0.201796735    | 4.300905321     | 4.478982685     | -9.647234406    | 1.675723785     |             |
| MM024       | 0.996072016     | 4.404914107     | 2.951999744     | 1.345681031     | 1.489720766     | 5.283442959     | 3.328943973     | 0.493730978     | 2.278667638     |             |
| MM025_1     | -2.426842115    | 4.143622983     | 2.652387176     | 1.464647592     | -2.210072913    | 4.406806375     | 5.251736053     | -5.653777617    | 2.412093062     |             |
| MM036_1     | -7.111319674    | 4.049544323     | 1.714940055     | 0.364254137     | -6.40668666     | 4.022717556     | 5.036185325     | -10.23741449    | 0.303673286     |             |
| MM036_2     | -6.06803924     | 4.196519743     | 1.574566663     | 0.802178122     | -7.624898466    | 3.915216673     | 4.855732644     | -6.411232173    | 0.038715695     |             |
| MM038       | -0.357037543    | 5.171636932     | 2.071835914     | 0.045132181     | -2.069030271    | 4.639701275     | 4.725376004     | -10.97560186    | 0.951098805     |             |
| MM039       | -1.574041043    | 4.924634022     | 2.405363931     | 1.158402397     | -1.283910653    | 4.585554245     | 4.972025633     | -4.001816189    | 1.89191158      |             |
| MM049       | -3.282478757    | 4.156825402     | 2.446068952     | 0.751246599     | -3.112406076    | 4.139301923     | 5.103769644     | -6.196420332    | 2.959972987     |             |
| MM071       | -4.064934595    | 4.120935856     | 1.755304951     | 1.578212136     | -3.408800098    | 3.695008147     | 2.071998073     | -5.199999561    | 2.23271678      |             |
| MM080       | -3.415187752    | 4.546219228     | 1.901781591     | 0.847631088     | -1.207298228    | 3.544590605     | 4.151818946     | -5.454374499    | 2.06587328      |             |
| MM081       | -3.723189008    | 2.2280984       | 1.222774667     | 1.801876956     | 0.399223808     | 3.113470395     | 2.691315426     | -9.917028427    | 3.044354824     |             |
| MM082       | -3.595253804    | 5.063584602     | 1.962250955     | -0.22439407     | -3.727615202    | 4.03135605      | 2.954115673     | -10.72826803    | 1.764508363     |             |
| MM098       | -4.297000577    | 3.752456164     | 2.963748236     | 1.843398953     | -1.025806505    | 4.49477825      | 4.290675402     | -3.260751567    | 1.939976759     |             |
| MM102       | -1.055640595    | 3.500440582     | 2.750541719     | 0.743574874     | -0.30804489     | 3.633922792     | 4.448855293     | -11.44780114    | 0.701201584     |             |
| MM109       | -3.704913774    | 3.613946007     | 1.042379249     | 1.012696057     | -5.217405139    | 2.860198777     | 4.734502188     | -5.452496963    | 1.294794524     |             |
| MM111_1     | -4.776052727    | 3.019684573     | 2.081593159     | 0.635975495     | -5.728531999    | 3.1331777       | 3.282548881     | -3.369435267    | 1.173439798     |             |
| MM111_2     | -3.20065391     | 1.865941186     | 2.472388272     | 2.172724655     | -4.939510971    | 3.533399507     | 1.621430839     | -4.948237099    | 1.903386246     |             |
| MM113_2     | 0.265254138     | 3.31085788      | 3.166863496     | 1.62699635      | 0.443721128     | 4.478025103     | 2.414569406     | -3.154377169    | 0.996704929     |             |
| MM117_2     | -3.182646503    | 3.233636071     | 2.291212645     | 1.209639897     | -4.017058905    | 4.164006224     | 5.947166164     | -4.758405157    | 1.029359859     |             |
| MM124       | -5.821263037    | 5.010619479     | 2.053472122     | 0.227022399     | -3.259715716    | 3.545728518     | 5.513615252     | -10.60447014    | 1.056283757     |             |
| MM129       | -3.41328233     | 2.255527346     | 1.584545364     | 1.776171857     | -0.897160092    | 3.705864664     | 3.172258306     | -9.314670855    | 1.823993825     |             |
| MM135       | -2.048251148    | 3.003567724     | 2.404522982     | 1.637547575     | -10.92119221    | 4.047355751     | 4.237021486     | -9.707525919    | 1.947130997     |             |
| MM137       | -3.444021597    | 2.208825244     | 2.03967748      | 0.642325857     | -4.677022702    | 3.500218487     | 5.181540357     | -5.785284504    | 0.981175824     |             |
| MM006       | -2.938206329    | 4.939668235     | 1.18240001      | 0.109309793     | -0.968272302    | 3.144537875     | 3.756585393     | -3.233800883    | 1.315367517     |             |
| MM008       | -1.302949333    | 3.725664723     | 2.109737488     | 1.461572382     | -0.665460139    | 4.00340418      | 4.615862672     | -6.23546619     | 1.95462848      |             |



Supplementary Table S5. log2(RPKM) expression values for 39 aminopeptidases genes and 17 housekeeping genes in MM patient samples in the FIMM dataset (n = 122) (7/21)

| Gene symbol | Aminopeptidase genes |                 |                 |                 |                 |                 |                 |                 |            | Gene symbol |
|-------------|----------------------|-----------------|-----------------|-----------------|-----------------|-----------------|-----------------|-----------------|------------|-------------|
|             | <i>KDM8</i>          | <i>LAP3</i>     | <i>LNPEP</i>    | <i>LTA4H</i>    | <i>METAP1</i>   | <i>METAP1D</i>  | <i>METAP2</i>   | <i>MMP14</i>    | ENSEMBL ID |             |
| Sample_ID   | ENSG00000155666      | ENSG00000002549 | ENSG00000113441 | ENSG00000111144 | ENSG00000164024 | ENSG00000172878 | ENSG00000111142 | ENSG00000157227 |            |             |
| MM032_1     | -1.289402851         | 3.853425761     | 2.293833014     | 3.355970894     | 1.925104264     | -0.855697351    | 3.728663153     | -0.662520596    |            |             |
| MM051_1     | -0.407259744         | 3.951547759     | 2.088580522     | 2.245401923     | 1.969887121     | 0.327313121     | 2.03756467      | -1.537271843    |            |             |
| MM053       | -1.370858617         | 4.498398223     | 2.571615843     | 2.855620179     | 1.564810601     | -0.915975238    | 2.731325343     | -3.638871869    |            |             |
| MM056_1     | -2.19147853          | 5.033232182     | 3.824190381     | 4.599557776     | 2.667472688     | 0.017070956     | 4.652336978     | -3.227370684    |            |             |
| MM063       | -1.811868895         | 4.965286696     | 2.822634779     | 3.957987342     | 2.085175067     | 0.741306303     | 4.137169176     | -5.47023437     |            |             |
| MM064       | -2.235341464         | 7.969959649     | 3.349448963     | 2.675821934     | 1.611410456     | -0.541503201    | 4.644305848     | -6.363679866    |            |             |
| MM065       | -0.403543121         | 4.26986211      | 2.756871986     | 3.133009933     | 2.114267921     | 1.95138011      | 3.790045758     | -1.310418421    |            |             |
| MM066       | -1.728059513         | 5.150837212     | 3.25452889      | 4.079816563     | 2.810548818     | 1.117847253     | 4.137387596     | -4.096892338    |            |             |
| MM067       | -1.729679294         | 4.274329961     | 2.168453865     | 3.753160177     | 1.750401431     | 1.09739021      | 3.965741172     | -4.793556147    |            |             |
| MM070       | -2.198784526         | 3.442908872     | 2.915090208     | 3.979781978     | 2.423056622     | 0.789092084     | 4.326024534     | -2.866997399    |            |             |
| MM074       | -1.485571867         | 4.092966867     | 2.862845704     | 2.786765382     | 2.087650307     | -0.605114972    | 3.531126988     | -2.250187722    |            |             |
| MM075       | -2.383708455         | 5.122149386     | 3.338888646     | 4.205297096     | 3.189662039     | -1.167239515    | 5.148304479     | -2.233348495    |            |             |
| MM078_1     | -1.65588142          | 5.5418344       | 1.940249936     | 4.884568597     | 2.034890869     | 0.13609123      | 3.984495735     | 0.198208421     |            |             |
| MM085       | -1.481134221         | 4.255575995     | 2.841507801     | 3.032954837     | 2.277677178     | -1.387648611    | 4.012755252     | -3.398880693    |            |             |
| MM086       | -0.359479969         | 4.993050383     | 3.139104113     | 3.783554785     | 2.879627698     | 0.67693804      | 4.678451493     | -2.795185624    |            |             |
| MM087       | -1.606284389         | 5.318070083     | 3.27521859      | 4.050641369     | 2.559863591     | 0.488677683     | 4.590012162     | -4.506813431    |            |             |
| MM088       | -2.455649755         | 3.222345253     | 2.354323007     | 5.735409978     | 1.298533618     | -1.400476465    | 4.310022526     | -3.7919754      |            |             |
| MM089       | -0.978798089         | 4.081688116     | 2.849302448     | 3.260238341     | 2.383377349     | 0.480220962     | 3.453274254     | -2.490294319    |            |             |
| MM090       | -0.713061672         | 5.765956735     | 3.885752643     | 5.290596132     | 3.027248451     | 1.783457376     | 4.877964872     | -2.658921682    |            |             |
| MM093       | -1.645455615         | 4.772211377     | 2.991701535     | 3.401920285     | 2.416427096     | -0.748752023    | 4.438604522     | -1.658798403    |            |             |
| MM094       | -0.418600601         | 4.985084972     | 2.93576356      | 2.984124702     | 2.572578287     | 2.011089084     | 4.51818213      | -3.557351244    |            |             |
| MM096       | -2.142085845         | 5.374550275     | 3.025305939     | 4.017089437     | 2.2873302       | 0.749876228     | 4.844693246     | -3.840426918    |            |             |
| MM101       | -1.536544183         | 4.830888256     | 3.387295639     | 3.164197861     | 2.857043625     | 0.245601732     | 4.182514417     | -1.743448751    |            |             |
| MM114       | -1.098999753         | 4.613234917     | 3.095982804     | 3.417720758     | 2.495093681     | 0.931053084     | 3.358689995     | -1.432816433    |            |             |
| MM115       | -1.154153648         | 5.743974666     | 3.111373649     | 4.120235686     | 2.849589016     | 0.16835053      | 4.012497844     | -2.888049604    |            |             |
| MM117_1     | -2.785547905         | 5.171432979     | 1.920909729     | 2.759265362     | 1.711954075     | -0.469487496    | 3.603608385     | -7.696599724    |            |             |
| MM118       | -0.68156599          | 5.107261799     | 2.927914548     | 3.310257778     | 2.878418738     | 1.702628687     | 4.153227195     | -0.294315722    |            |             |
| MM119       | -0.088120591         | 5.137886198     | 2.961800632     | 3.964789132     | 2.3350805       | 0.412631504     | 4.001190576     | -3.417219515    |            |             |
| MM121       | -1.9036649           | 4.225035367     | 3.057511026     | 3.512440246     | 2.413424327     | 0.425046648     | 3.942984848     | -1.716797873    |            |             |
| MM122       | -1.0628097           | 4.571495704     | 2.82599896      | 4.776077337     | 2.156903036     | -2.028118852    | 4.510828284     | -1.376779425    |            |             |
| MM123       | -0.502815992         | 4.191848721     | 2.832577355     | 3.70190803      | 2.94528952      | 0.784880528     | 4.112942146     | -3.194865978    |            |             |
| MM126       | -0.219744899         | 4.836342537     | 3.328216786     | 3.581103916     | 2.146786046     | 0.451198895     | 3.485482418     | -0.299450574    |            |             |
| MM128_1     | -2.187045723         | 4.490301274     | 3.360366905     | 4.022082806     | 2.867402445     | -1.138123665    | 4.089740265     | -5.180199133    |            |             |
| MM131       | -1.153153467         | 4.712732648     | 3.260442992     | 3.579606276     | 2.595776382     | 0.526968731     | 4.514007347     | 1.633055771     |            |             |
| MM132       | -2.639542958         | 4.265729715     | 2.327220464     | 2.632609784     | 1.718792897     | -1.570769744    | 3.404784753     | -2.67130257     |            |             |
| MM133       | -1.687319413         | 3.956614777     | 2.279819127     | 3.055269554     | 1.25163128      | -0.67161314     | 3.255277611     | -2.547613395    |            |             |
| MM134       | -1.873831394         | 4.110573902     | 2.703991662     | 4.404829534     | 2.544829534     | -0.517061606    | 4.266178447     | 1.146168292     |            |             |
| MM136       | -1.028580529         | 4.848892728     | 3.250583091     | 3.42240162      | 2.09681345      | -0.840905106    | 3.348789366     | -3.469810954    |            |             |
| MM138       | -1.735501236         | 4.127798701     | 2.702063075     | 3.425619188     | 2.324366302     | 0.343190524     | 3.551029816     | -0.266137721    |            |             |
| MM139       | -0.438512851         | 3.710395072     | 1.630032714     | 3.039704373     | 2.094703121     | -0.378137798    | 3.52465941      | -2.914555325    |            |             |
| MM140       | -1.223955589         | 4.435421775     | 2.875989578     | 3.067191968     | 2.597172136     | -0.056464633    | 2.996450739     | -3.1437065      |            |             |
| MM026       | -2.459888973         | 5.48972254      | 2.901864897     | 2.094989833     | 1.564735408     | -0.457981514    | 3.418517416     | -2.335041221    |            |             |
| MM027       | -0.403875077         | 6.217160274     | 2.533698307     | 3.815985462     | 2.801650355     | -0.902114963    | 4.917320818     | -4.945344379    |            |             |
| MM028       | -1.390508932         | 4.380430616     | 3.179373462     | 4.50076472      | 2.976388174     | -0.063830674    | 4.566301243     | 1.268420151     |            |             |

Supplementary Table S5. log2(RPKM) expression values for 39 aminopeptidases genes and 17 housekeeping genes in MM patient samples in the FIMM dataset (n = 122) (8/21)

| Gene symbol | <i>KDM8</i>     | <i>LAP3</i>     | <i>LNPEP</i>    | <i>LTA4H</i>    | <i>METAP1</i>   | <i>METAP1D</i>  | <i>METAP2</i>   | <i>MMP14</i>    | Gene symbol  |
|-------------|-----------------|-----------------|-----------------|-----------------|-----------------|-----------------|-----------------|-----------------|--------------|
| Sample_ID   | ENSG00000155666 | ENSG00000002549 | ENSG00000113441 | ENSG00000111144 | ENSG00000164024 | ENSG00000172878 | ENSG00000111142 | ENSG00000157227 | ENSEMBL ID   |
| MM030_1     | -0.678563666    | 4.295712397     | 3.862803473     | 3.118351139     | 3.206442668     | 1.988565865     | 4.839657443     | -3.254542014    |              |
| MM030_2     | -2.237891512    | 4.652214125     | 3.300698604     | 5.437224823     | 1.909488621     | 0.827221637     | 4.073340878     | -1.453458741    |              |
| MM031_2     | -1.438734796    | 3.965454966     | 2.918210524     | 3.833418975     | 1.334467107     | -0.400496258    | 4.133473604     | -3.488403759    |              |
| MM033_4     | -0.543247317    | 5.085840587     | 2.315252518     | 3.818210307     | 3.966166658     | 2.096990778     | 4.432743441     | -0.982033557    |              |
| MM033_1     | 0.019974094     | 5.387666587     | 2.933314954     | 3.410567492     | 3.28673346      | 1.859053286     | 3.451094512     | -2.016073185    |              |
| MM033_2     | -1.082874198    | 5.454113681     | 2.011893867     | 3.796456399     | 3.592808121     | 1.956732954     | 4.413741919     | -2.707724416    |              |
| MM034_2     | -2.361526087    | 5.150624155     | 3.66384142      | 5.847380546     | 1.517154509     | -2.662866103    | 4.091985413     | -0.556285286    |              |
| MM034_1     | -2.43332904     | 6.06645782      | 3.051140566     | 4.365956966     | 2.097997995     | -0.467261237    | 4.897406722     | -1.752934093    |              |
| MM037       | -2.603193625    | 4.117502766     | 3.096642154     | 4.036348832     | 1.528264168     | -0.437111992    | 3.87170584      | -0.12283089     |              |
| MM041       | -1.159221108    | 4.798314268     | 3.637642752     | 2.882303609     | 2.392660097     | 0.744493606     | 4.672347713     | -5.891382144    |              |
| MM042       | 0.101893403     | 4.428100772     | 2.168878855     | 2.485291803     | 2.849859171     | -0.510286947    | 3.355969252     | -3.23636596     |              |
| MM043_1     | -0.722014497    | 4.642066989     | 3.414739619     | 3.414739619     | 3.389301498     | 3.3680796       | 1.002317097     | 4.042169553     | -2.446425382 |
| MM043_2     | 0.620390403     | 4.4456455       | 3.000085394     | 3.442903091     | 3.008078269     | 1.459429516     | 3.950179013     | -2.530515149    |              |
| MM044       | -1.1205164      | 4.606958099     | 1.863029151     | 2.241652876     | 2.514129347     | 0.032720637     | 5.010275662     | -1.295175732    |              |
| MM045       | -1.313072977    | 5.279567573     | 3.103963353     | 3.959192718     | 3.277666935     | 1.537150228     | 4.469369723     | -1.114988733    |              |
| MM046_1     | -0.985964157    | 4.787198304     | 3.723556574     | 4.339861714     | 2.770897694     | 0.319565181     | 4.510649452     | -2.162934042    |              |
| MM046_2     | -0.286118808    | 4.138008927     | 3.162020206     | 4.263982867     | 3.123096874     | 1.170178802     | 4.670650653     | -1.478975626    |              |
| MM048_2     | -6.155309828    | 4.864796918     | 2.71453496      | 3.292584276     | 2.613520815     | -0.20335903     | 5.090827778     | -3.680738876    |              |
| MM050       | -1.077959046    | 5.492499976     | 3.679440389     | 2.694862385     | 2.63396494      | -0.804457164    | 4.157618613     | -3.9630551      |              |
| MM051_2     | -0.887440385    | 5.012604758     | 3.278927661     | 3.202765504     | 3.192775175     | 0.259344285     | 3.889326944     | -3.066267643    |              |
| MM054       | -1.593861976    | 4.478847553     | 1.862068658     | 2.298827379     | 1.695024306     | -0.876790141    | 2.391790473     | -2.911265566    |              |
| MM056_2     | -2.553073837    | 5.292489272     | 2.771673183     | 3.942777244     | 2.343973725     | 1.425277634     | 3.791421749     | -4.444226099    |              |
| MM057_4     | -0.734289394    | 5.96798121      | 2.877720294     | 3.80418909      | 3.585780959     | 2.679000086     | 4.648505436     | -3.343160766    |              |
| MM057_5     | -1.50116443     | 5.816281587     | 2.633884753     | 4.444727422     | 2.758828028     | 1.990148493     | 4.67110534      | -4.059305097    |              |
| MM057_6     | -1.261161794    | 5.488512148     | 2.950057753     | 4.280038845     | 2.425542302     | 2.038440454     | 5.005536789     | -6.340960423    |              |
| MM057_1     | -0.367429097    | 4.482829705     | 2.794238572     | 3.995431709     | 3.298472443     | 3.079688625     | 4.851783034     | -3.864722969    |              |
| MM057_2     | -1.106918262    | 4.525108558     | 2.667253108     | 4.364347418     | 2.4161443       | 0.634088126     | 4.692050716     | 2.096884469     |              |
| MM057_3     | -0.84269897     | 5.930046472     | 2.770626662     | 4.326228484     | 3.233839128     | 2.713957362     | 5.359369254     | -4.714622209    |              |
| MM058_1     | -1.573004445    | 8.473779277     | 3.278433084     | 2.572787153     | 3.141368712     | 1.526937606     | 3.893298065     | -2.90234199     |              |
| MM059       | -1.588007974    | 5.30104749      | 2.119983008     | 2.964337164     | 1.8730942       | 0.003478942     | 4.602216401     | -2.936404541    |              |
| MM060       | -1.401066543    | 6.166197769     | 2.645462661     | 4.005433015     | 2.776822022     | 0.117324412     | 4.458547816     | 0.706586614     |              |
| MM061_1     | -1.798970442    | 5.738087025     | 1.938501045     | 3.191317973     | 2.396295008     | 0.010996697     | 3.84736092      | -3.873812476    |              |
| MM068_1     | -0.884920716    | 4.15246332      | 2.702205039     | 3.202797112     | 2.001907301     | -1.843727797    | 3.375008052     | -3.047113262    |              |
| MM068_2     | -1.072795101    | 5.06968816      | 3.22419068      | 4.259046247     | 2.037328661     | -2.449626744    | 4.223334568     | -2.567262435    |              |
| MM091       | -1.877819768    | 6.427476342     | 3.426814025     | 3.447437136     | 2.536020119     | 0.961658572     | 4.823532448     | -2.435947602    |              |
| MM095       | -0.76849501     | 4.904816733     | 3.430518207     | 2.408079268     | 2.659319207     | 0.765863286     | 3.187360234     | -1.172812817    |              |
| MM002_1     | -1.339946047    | 4.431482472     | 2.702956867     | 3.379136644     | 2.092490392     | -0.751540627    | 4.031079627     | -2.961153648    |              |
| MM002_2     | -1.378297312    | 4.183235767     | 2.454000528     | 3.218641864     | 1.802068491     | -1.511725072    | 3.873379163     | -5.008588688    |              |
| MM002_3     | -1.758504006    | 4.146493059     | 2.513731263     | 3.039819208     | 1.089606582     | -1.197528532    | 4.075974692     | -4.086442826    |              |
| MM003       | 0.120052123     | 4.462294944     | 3.067873476     | 3.879867143     | 3.370552621     | 1.025898447     | 5.89006877      | -2.171601743    |              |
| MM005       | -1.547294001    | 5.602832156     | 3.165658875     | 4.48690462      | 2.175196432     | 0.589281242     | 4.879523849     | 0.302831969     |              |
| MM007       | -1.399038741    | 5.587903171     | 3.884548518     | 4.278130726     | 3.10366452      | -0.18844039     | 4.767447691     | -4.649349991    |              |
| MM010       | -0.359552424    | 6.166183101     | 3.444412105     | 3.574661608     | 3.213394464     | 1.268670586     | 5.230609289     | -2.71080274     |              |
| MM011       | -0.006579099    | 5.949137591     | 3.442137224     | 3.718768248     | 2.998696444     | 1.857491056     | 4.967632685     | -4.994264581    |              |

Supplementary Table S5. log2(RPKM) expression values for 39 aminopeptidases genes and 17 housekeeping genes in MM patient samples in the FIMM dataset (n = 122) (9/21)

| Gene symbol | <i>KDM8</i>     | <i>LAP3</i>     | <i>LNPEP</i>    | <i>LTA4H</i>    | <i>METAP1</i>   | <i>METAP1D</i>  | <i>METAP2</i>   | <i>MMP14</i>    | Gene symbol |
|-------------|-----------------|-----------------|-----------------|-----------------|-----------------|-----------------|-----------------|-----------------|-------------|
| Sample_ID   | ENSG00000155666 | ENSG00000002549 | ENSG00000113441 | ENSG00000111144 | ENSG00000164024 | ENSG00000172878 | ENSG00000111142 | ENSG00000157227 | ENSEMBL ID  |
| MM014_4     | -0.98267522     | 5.070234943     | 2.41301941      | 3.144510653     | 2.771254572     | 0.644252192     | 4.147727859     | -1.76666931     |             |
| MM014_2     | -1.195933129    | 5.458842914     | 2.661908047     | 2.708478025     | 2.312677063     | 0.134843726     | 4.151249033     | -3.798229234    |             |
| MM017_1     | -1.458133279    | 6.118861276     | 3.23081718      | 3.615018488     | 2.411158696     | 0.303269463     | 4.812611467     | -6.540148881    |             |
| MM017_2     | -0.602420112    | 5.289516014     | 3.138741475     | 3.262759083     | 2.304873165     | 0.665009304     | 4.701888846     | -3.882984476    |             |
| MM017_3     | -1.671075657    | 5.331282001     | 3.012698882     | 3.526858446     | 2.943131936     | -0.026035919    | 5.04361753      | -4.771214734    |             |
| MM018       | 0.610642134     | 4.90154721      | 3.009962822     | 3.445635585     | 2.266716426     | 1.008239315     | 3.936234824     | -1.557359425    |             |
| MM019       | -1.312516192    | 5.835081962     | 2.394455487     | 3.286993948     | 2.798047651     | 0.688934103     | 4.257304665     | -4.911677438    |             |
| MM020       | -1.029969204    | 4.782390365     | 3.567590039     | 3.628752521     | 3.297498003     | 1.647950553     | 4.234311869     | 4.780041737     |             |
| MM022_1     | 0.826725088     | 4.626967549     | 3.513684845     | 2.59881212      | 1.949216524     | 0.04227634      | 3.456927839     | -0.98128827     |             |
| MM022_3     | -0.482694674    | 5.004274523     | 3.136883094     | 2.359143964     | 0.962971009     | 0.040491552     | 4.025770806     | -2.293842495    |             |
| MM024       | -0.871054609    | 5.692345004     | 3.534028589     | 3.392949153     | 3.64298652      | 1.501718157     | 4.014438298     | -2.26667689     |             |
| MM025_1     | -0.84266957     | 5.244292316     | 3.277470744     | 2.92001327      | 2.87892304      | 0.442619474     | 4.130261972     | -4.316509765    |             |
| MM036_1     | -2.766525307    | 5.39702953      | 3.073774319     | 4.950256999     | 2.878039092     | -1.063048843    | 4.618830008     | 1.415459794     |             |
| MM036_2     | -3.369244184    | 5.372242444     | 3.080544209     | 4.302022907     | 2.601386448     | -1.247877311    | 4.420956403     | 1.379735511     |             |
| MM038       | -2.214282734    | 3.953342647     | 3.583542448     | 4.29519119      | 3.15563853      | -1.235451813    | 3.90706914      | -2.679857604    |             |
| MM039       | -1.999070532    | 3.489217552     | 2.644714535     | 3.57158729      | 2.090370723     | 0.775660661     | 4.616075216     | 0.356183104     |             |
| MM049       | -1.790961986    | 4.609232447     | 3.066119498     | 3.014997052     | 2.476986092     | 1.672377407     | 3.742928056     | -3.060259137    |             |
| MM071       | -2.259645438    | 4.34992107      | 1.602384903     | 2.138606833     | 2.264374503     | 1.015845182     | 4.435378997     | -3.166560557    |             |
| MM080       | -1.150162835    | 5.516211886     | 2.661340539     | 3.118013071     | 2.291811618     | 1.213559753     | 4.21139457      | -5.862533821    |             |
| MM081       | -0.391315222    | 4.690984456     | 2.567178577     | 2.121097181     | 2.359749484     | 1.595796732     | 4.430206624     | -2.924308312    |             |
| MM082       | -1.789964647    | 5.911899302     | 2.728802318     | 3.381263325     | 2.159136666     | -0.139081394    | 4.777108904     | -6.092033232    |             |
| MM098       | -0.891029326    | 5.606811414     | 2.951668007     | 2.408588228     | 2.401710208     | 0.14185471      | 3.802446446     | -2.236683628    |             |
| MM102       | -1.520562366    | 4.326543692     | 3.767541975     | 5.602912985     | 2.452536361     | -2.212395815    | 3.984671634     | -1.204011851    |             |
| MM109       | -2.089720414    | 5.495363918     | 2.033117502     | 2.716604718     | 2.719169766     | 0.264027685     | 4.710444088     | -4.470196808    |             |
| MM111_1     | -1.025418741    | 5.8389667       | 2.131823387     | 3.210357321     | 2.178956759     | 0.820574936     | 5.119813816     | -1.408998434    |             |
| MM111_2     | -0.2892254      | 5.583613795     | 2.232782208     | 2.568911038     | 2.488591631     | 1.813316091     | 5.101781499     | -0.262884535    |             |
| MM113_2     | -0.763936665    | 4.635729874     | 4.093664337     | 5.073113675     | 3.331438916     | 0.005516396     | 5.547630749     | 0.612721956     |             |
| MM117_2     | -1.9816715      | 6.137296892     | 2.41618668      | 3.080268099     | 2.369510998     | 0.855670855     | 4.25647167      | -6.355598303    |             |
| MM124       | -0.717274038    | 5.711699379     | 2.754584251     | 4.239798724     | 2.955179906     | 0.909724129     | 4.255994576     | -4.244445133    |             |
| MM129       | 0.088620246     | 5.421023598     | 2.526057909     | 3.000317387     | 2.918699952     | 1.221591183     | 4.86401901      | -3.382980174    |             |
| MM135       | -2.236636739    | 5.366462125     | 2.376968553     | 3.96038919      | 2.142207536     | 0.942709368     | 4.522005015     | -1.635904977    |             |
| MM137       | -2.489872718    | 6.370458967     | 2.101543401     | 2.890056915     | 2.117459651     | -0.568767332    | 4.399711664     | -3.586786253    |             |
| MM006       | -1.555996896    | 5.664342919     | 2.933922601     | 3.666691046     | 2.530439807     | -1.700725682    | 3.890583616     | -4.482019291    |             |
| MM008       | -1.262568925    | 5.114198985     | 2.968101716     | 3.301937342     | 2.777570055     | 1.457887373     | 3.93732594      | -0.354962963    |             |

Supplementary Table S5. log2(RPKM) expression values for 39 aminopeptidases genes and 17 housekeeping genes in MM patient samples in the FIMM dataset (n = 122) (10/21)

| Aminopeptidase genes |                 |                 |                 |                 |                 |                 |                 |                 | Gene symbol |
|----------------------|-----------------|-----------------|-----------------|-----------------|-----------------|-----------------|-----------------|-----------------|-------------|
| Gene symbol          | <i>NAALADLI</i> | <i>NPEPLI</i>   | <i>NPEPPS</i>   | <i>PEPD</i>     | <i>PGPEPI</i>   | <i>RNPEP</i>    | <i>RNPEPLI</i>  | <i>TPPI</i>     | ENSEMBL ID  |
| Sample_ID            | ENSG00000168060 | ENSG00000215440 | ENSG00000141279 | ENSG00000124299 | ENSG00000130517 | ENSG00000176393 | ENSG00000142327 | ENSG00000166340 |             |
| <b>MM032_1</b>       | -2.447161258    | 0.850950493     | 0.932287414     | 0.861644522     | 1.815242644     | 1.4692232       | -0.080886529    | 1.961788755     |             |
| <b>MM051_1</b>       | -2.458848151    | 3.001369701     | 1.810807881     | 1.425664772     | 2.881682408     | 1.480547528     | 2.496297577     | 3.237727995     |             |
| <b>MM053</b>         | -0.040128233    | 1.922031172     | 0.258387805     | 2.956369086     | 2.469934308     | 1.350328998     | 2.067943745     | 1.179435764     |             |
| <b>MM056_1</b>       | -4.90717374     | -0.193309708    | 2.155460778     | 1.648619656     | 2.114265851     | 2.737223869     | -0.915129514    | 0.658266711     |             |
| <b>MM063</b>         | -4.032224457    | 0.538480288     | 2.240005782     | 1.996760903     | 1.254821651     | 0.890112911     | -0.683381803    | 0.200037492     |             |
| <b>MM064</b>         | -3.769429867    | 0.336152286     | 1.407837635     | 0.876256253     | 1.508343686     | 1.881860261     | -0.861069625    | 0.345594407     |             |
| <b>MM065</b>         | -1.280797919    | 1.579710434     | 2.476692762     | 1.04476302      | 1.418059286     | 2.732876338     | 0.479478555     | 2.612445633     |             |
| <b>MM066</b>         | -2.96913531     | 1.395998453     | 2.261963212     | 1.286767379     | 2.489653017     | 1.970553704     | 0.553446459     | 1.629898604     |             |
| <b>MM067</b>         | -3.55874361     | 0.710476698     | 1.968843898     | 1.113186452     | 1.550489897     | 0.563554004     | -0.953082289    | 0.695275688     |             |
| <b>MM070</b>         | -0.425668349    | 0.951187621     | 2.09734047      | 1.680471858     | 2.700470028     | 0.816746715     | -0.480230169    | 2.070232722     |             |
| <b>MM074</b>         | -3.023634706    | -0.172530771    | 2.064858309     | 0.361199369     | 1.794479401     | 1.234106264     | 0.60031081      | 2.98606365      |             |
| <b>MM075</b>         | -2.159019708    | 0.223462423     | 1.395604891     | 0.482454698     | 1.872696359     | 0.852412062     | -1.675548498    | 1.190253556     |             |
| <b>MM078_1</b>       | -1.226491657    | -1.3271663      | 0.92910348      | 1.090050116     | 1.047793312     | 2.926413321     | 0.230081569     | 1.683292876     |             |
| <b>MM085</b>         | -5.058100552    | -0.974861037    | 1.010202294     | 0.397454571     | 1.724145631     | 0.636932084     | -1.556283414    | 0.551209172     |             |
| <b>MM086</b>         | -1.888209038    | 1.03545971      | 2.166754042     | 1.470164895     | 1.48531264      | 1.362352593     | 1.005641829     | 2.895429862     |             |
| <b>MM087</b>         | -6.551886405    | 0.405287183     | 2.20289165      | 1.99706848      | 2.314899828     | 3.351918966     | 1.267720958     | 0.019095623     |             |
| <b>MM088</b>         | -2.697604904    | -0.558868976    | 0.508091191     | 1.046072232     | 1.136700622     | 0.415832106     | -0.541187028    | 1.46835829      |             |
| <b>MM089</b>         | -5.554898197    | 0.044213728     | 2.331542674     | 0.341633565     | 2.306806567     | 0.213185195     | -0.292764807    | 1.803580114     |             |
| <b>MM090</b>         | -5.340117012    | -0.163014983    | 2.736888359     | 1.384065898     | 1.819130618     | 1.264493713     | -0.401005956    | 0.770090245     |             |
| <b>MM093</b>         | -4.696642706    | 0.774595804     | 2.141317385     | 1.172457689     | 2.248024472     | 1.957418031     | -0.113113603    | 1.169802808     |             |
| <b>MM094</b>         | -2.175506268    | 0.773375748     | 2.26579871      | 1.210559136     | 2.213330002     | 1.855693208     | 0.604525944     | 2.385936611     |             |
| <b>MM096</b>         | -4.392580794    | -0.264363458    | 2.145261921     | 0.6441445       | 2.507622177     | 2.018423173     | 1.066107994     | 1.60384957      |             |
| <b>MM101</b>         | -3.687358811    | 0.737234203     | 1.662988849     | 1.264903381     | 1.738133727     | 1.937743999     | 0.012204689     | 2.143872496     |             |
| <b>MM114</b>         | -5.649221229    | -0.282537507    | 3.056583403     | 1.173470411     | 1.336759467     | 0.974561805     | 0.293313753     | 1.813603664     |             |
| <b>MM115</b>         | -4.838144862    | 0.651881404     | 2.743945206     | 1.691331015     | 2.811199701     | 2.118780502     | 0.749272902     | 1.385220982     |             |
| <b>MM117_1</b>       | -6.080114506    | -0.734307355    | 0.880400005     | 1.018039066     | 1.604628893     | 1.45060447      | -1.242429254    | -0.367360436    |             |
| <b>MM118</b>         | -4.515367818    | 0.585956857     | 2.29406924      | 1.345947375     | 2.056163378     | 2.234467878     | -0.296723103    | 1.450677192     |             |
| <b>MM119</b>         | -3.320108456    | -0.451490557    | 2.020056413     | 1.563471165     | 0.607468099     | 0.761732785     | -0.084721932    | 2.13920327      |             |
| <b>MM121</b>         | -3.644633171    | 0.077688929     | 1.89039487      | 1.018605524     | 1.570227733     | 1.490422932     | 0.007054185     | 1.99123928      |             |
| <b>MM122</b>         | -2.12958096     | -0.0080976      | 1.399897421     | 1.425843563     | 1.67268604      | 1.89874786      | -0.231801137    | 1.241112216     |             |
| <b>MM123</b>         | -3.439335071    | 1.264625614     | 3.000396261     | 1.168308253     | 1.5217816       | 2.055187837     | 0.739467924     | 1.810307335     |             |
| <b>MM126</b>         | -3.882843137    | 0.132997322     | 1.794436663     | 1.005733102     | 1.670428267     | 1.270819776     | 0.160475501     | 2.051293567     |             |
| <b>MM128_1</b>       | -4.72161761     | 0.475767434     | 1.087965007     | 1.425853005     | 2.077148174     | 0.873663175     | -1.000538294    | -0.448857896    |             |
| <b>MM131</b>         | -10.4426507     | 0.530015123     | 1.737485533     | 1.469238538     | 1.823058945     | 2.302180965     | 0.376078959     | 1.445277221     |             |
| <b>MM132</b>         | -3.89187127     | -2.544743978    | 0.618511109     | 1.705643428     | 0.698827965     | 1.04052653      | -1.667949582    | 0.332604145     |             |
| <b>MM133</b>         | -3.267029215    | -0.208229299    | 1.317851428     | 1.026154124     | 0.939968045     | 1.682168046     | 0.022599975     | 1.491108899     |             |
| <b>MM134</b>         | -2.90518936     | -0.664670169    | 1.331124753     | 0.956239125     | 1.17537829      | 0.9173676       | -1.413172215    | 1.625177261     |             |
| <b>MM136</b>         | -2.398810185    | -0.028672045    | 1.817113329     | 1.531056415     | 2.360329991     | 1.613376725     | 0.873687451     | 0.72125103      |             |
| <b>MM138</b>         | -6.606925288    | 0.236647482     | 1.711303492     | 1.376009139     | 1.648021569     | 0.856436615     | -0.382706018    | 0.925029537     |             |
| <b>MM139</b>         | -1.459092636    | -0.16588482     | 1.550493836     | 0.719421576     | 1.553506158     | 0.267564756     | -0.421795249    | 0.778639701     |             |
| <b>MM140</b>         | -5.455328363    | -0.315856554    | 1.804512472     | 0.365874684     | 1.385514901     | 0.762683358     | -1.073532762    | 1.836930339     |             |
| <b>MM026</b>         | -3.58864668     | -0.831260831    | 2.121607173     | 0.467180477     | 0.76645568      | 2.10588193      | -0.15115475     | 0.938526813     |             |
| <b>MM027</b>         | -2.771494219    | 0.326307253     | 2.704825716     | 0.794710321     | 1.493990236     | 1.181807508     | -0.831580508    | 1.384229369     |             |
| <b>MM028</b>         | -2.904827811    | 0.491357688     | 1.898264591     | 1.467772968     | 1.40437916      | 1.588249146     | -0.379579789    | 1.974383525     |             |

Supplementary Table S5. log2(RPKM) expression values for 39 aminopeptidases genes and 17 housekeeping genes in MM patient samples in the FIMM dataset (n = 122) (11/21)

| Gene symbol | <i>NAALADLI</i> | <i>NPEPLI</i>   | <i>NPEPPS</i>   | <i>PEPD</i>     | <i>PGPEPI</i>   | <i>RNPEP</i>    | <i>RNPEPLI</i>  | <i>TPPI</i>     | Gene symbol |
|-------------|-----------------|-----------------|-----------------|-----------------|-----------------|-----------------|-----------------|-----------------|-------------|
| Sample_ID   | ENSG00000168060 | ENSG00000215440 | ENSG00000141279 | ENSG00000124299 | ENSG00000130517 | ENSG00000176393 | ENSG00000142327 | ENSG00000166340 | ENSEMBL_ID  |
| MM030_1     | -3.618947972    | 0.385905704     | 3.266619708     | 0.416794883     | 2.07132849      | 2.103451582     | 1.010132223     | 2.316969709     |             |
| MM030_2     | -2.359553874    | 0.709716281     | 2.514085921     | 1.913471058     | 1.861324194     | 2.953419947     | 1.175014671     | 1.679079076     |             |
| MM031_2     | -1.114018823    | -0.834483658    | 1.695134072     | 1.264471941     | 1.774351922     | 1.224431263     | -1.240432967    | 0.42714702      |             |
| MM033_4     | -0.694571222    | 1.375708461     | 2.814393847     | 0.766140464     | 2.492137501     | 2.291400859     | 0.153515914     | 2.253865387     |             |
| MM033_1     | 1.035754092     | 2.838701803     | 2.228733572     | 2.59883303      | 3.075257609     | 3.336494397     | 3.260573366     | 3.158241182     |             |
| MM033_2     | -1.186658763    | 0.568306121     | 2.091590016     | 1.247829716     | 2.392877537     | 2.297992841     | -0.68766064     | 1.919530853     |             |
| MM034_2     | -1.183687968    | 0.285506304     | 2.273652359     | 2.087655262     | 0.850731383     | 2.507943519     | -0.876371378    | 2.180023493     |             |
| MM034_1     | -3.672418022    | 0.150825333     | 0.358803983     | 1.688235953     | 2.077275213     | 1.560183378     | -1.022487144    | 1.894181337     |             |
| MM037       | -2.770037723    | -1.041713861    | 2.17158921      | 1.42053598      | 1.09829541      | 1.688543023     | -1.26255111     | -0.753657194    |             |
| MM041       | -3.175361253    | 1.287666721     | 2.120912881     | 1.882826832     | 2.678686933     | 1.685605255     | 0.955170079     | 0.415242062     |             |
| MM042       | -2.799364572    | 1.762623732     | 1.620382386     | 2.73143202      | 2.966531905     | 2.873641965     | 2.320504854     | 2.557846191     |             |
| MM043_1     | -4.434070075    | 0.288598095     | 3.634202157     | 1.051821479     | 0.720707824     | 2.540596932     | 0.477353044     | 2.594647816     |             |
| MM043_2     | -3.653103188    | 0.870406488     | 3.216132778     | 2.256016559     | 1.896635136     | 2.682766103     | 1.487191169     | 2.877184553     |             |
| MM044       | -1.751696939    | 1.031953922     | 1.099807102     | 2.162614847     | 2.347175859     | 2.199959561     | 2.0446125       | 2.075661359     |             |
| MM045       | -1.69446781     | 1.179109939     | 2.378398966     | 1.280339856     | 2.338929393     | 1.60623505      | 0.303053929     | 2.897602304     |             |
| MM046_1     | -1.570408723    | 0.785107288     | 2.963928143     | 2.011708136     | 3.289912555     | 2.306211049     | 1.727929328     | 2.076570801     |             |
| MM046_2     | -1.311573704    | 1.389518787     | 3.003981528     | 1.399041963     | 3.411826873     | 2.013235201     | 1.654768522     | 2.25829581      |             |
| MM048_2     | -10.5494121     | -1.015149324    | 1.815746924     | 1.199138651     | 1.16412409      | 0.679624283     | -1.072079839    | 1.614423371     |             |
| MM050       | -5.009534895    | 1.078335718     | 2.407048947     | 1.131012375     | 2.007446653     | 1.790733427     | -1.175005375    | 2.158435164     |             |
| MM051_2     | -3.84816258     | 1.335539902     | 3.271436757     | 0.69826643      | 1.711291973     | 1.652839282     | -0.072410344    | 2.099431909     |             |
| MM054       | -4.193209364    | 1.71257047      | 0.556132345     | 2.334219773     | 1.216262347     | 3.92328438      | 2.285730481     | 2.052233866     |             |
| MM056_2     | -5.133944623    | 0.825641624     | 2.039344506     | 1.290916083     | 2.327047626     | 1.830539995     | -0.272569349    | 0.498582154     |             |
| MM057_4     | -3.277568718    | 1.171613218     | 3.136570516     | 1.868429485     | 1.534367875     | 1.681193276     | 0.474439241     | 2.008948193     |             |
| MM057_5     | -2.544333202    | 0.242817842     | 3.071757884     | 2.097136161     | 1.113843547     | 0.726164329     | -0.090322534    | 1.363065361     |             |
| MM057_6     | -3.407634355    | 0.318243371     | 2.172316354     | 2.523783935     | 0.779718874     | 0.838882887     | -0.87920243     | 1.031777987     |             |
| MM057_1     | -3.172481913    | 1.624465177     | 2.712764899     | 1.585387763     | 2.268887166     | 1.815300474     | 0.80185257      | 2.815526651     |             |
| MM057_2     | -2.828725962    | 0.93188231      | 2.705079442     | 1.477048995     | 2.342194941     | 2.433665879     | 1.077543899     | 3.253228764     |             |
| MM057_3     | -3.072714394    | 0.592430979     | 1.715618791     | 2.26945601      | 1.457721361     | 0.985112015     | -1.430376741    | 2.095179028     |             |
| MM058_1     | -4.221015092    | 0.370320511     | 2.4438292       | 2.451210282     | 2.516084296     | 2.653523805     | 0.302669325     | 0.7490991       |             |
| MM059       | -5.249302279    | -1.155037146    | 1.822592363     | 1.174833837     | 2.01363084      | 2.317072512     | 0.425170783     | 1.572712529     |             |
| MM060       | -1.525234137    | 0.173805794     | 2.102619715     | 1.347112322     | 1.038719938     | 1.886107859     | -0.67153        | 0.635369187     |             |
| MM061_1     | -4.19964537     | 0.673048244     | 1.517397565     | 1.368837041     | 1.890038011     | 2.786374337     | -0.516461932    | 0.408047383     |             |
| MM068_1     | -4.665678688    | 0.037157732     | 1.28687767      | 1.404171771     | 1.275381003     | 1.435978809     | 0.417418821     | 2.622043668     |             |
| MM068_2     | -3.901029646    | -0.455452068    | 1.196421407     | 1.417491702     | 1.630198522     | 1.070414357     | -0.739397855    | 0.057753378     |             |
| MM091       | -5.11076725     | 0.523970238     | 2.913028267     | 0.558682927     | 1.457907137     | 2.352649186     | -1.146624523    | 1.3593139       |             |
| MM095       | -3.319991515    | 1.381604938     | 2.662382641     | 1.73209445      | 1.958985753     | 1.74269537      | 0.67649263      | 2.865873246     |             |
| MM002_1     | -1.666137141    | -0.087951434    | 0.947338292     | 1.022569433     | 0.197967637     | 0.197967637     | -1.677584306    | 0.436829188     |             |
| MM002_2     | -1.804787469    | -0.318571656    | 1.352490456     | 0.813210173     | 1.657900901     | 0.172036077     | -0.627091005    | 2.231534247     |             |
| MM002_3     | -2.19460994     | -0.327592172    | 1.29086625      | 1.158920488     | 1.569905745     | -0.220645668    | -1.369688347    | 1.527330403     |             |
| MM003       | -2.912723595    | 0.660097041     | 2.945705462     | 1.45650911      | 2.732068076     | 2.899613556     | 0.889003487     | 1.891657343     |             |
| MM005       | -0.017714456    | -0.612236661    | 2.057076617     | 1.565569607     | 1.074446017     | 2.038079725     | -0.467945576    | 1.067623146     |             |
| MM007       | -5.776885125    | 0.681708723     | 2.410036865     | 2.026999116     | 1.158447383     | 2.821640906     | -0.115051425    | 1.552281373     |             |
| MM010       | 0.271896147     | 0.573661135     | 1.75277813      | 2.084543581     | 2.319969227     | 1.123290192     | -0.525803109    | 1.354468868     |             |
| MM011       | -6.121799714    | 0.709203893     | 2.847554626     | 1.560343902     | 2.418982155     | 3.69270594      | 0.167140798     | 2.91445711      |             |

Supplementary Table S5. log2(RPKM) expression values for 39 aminopeptidases genes and 17 housekeeping genes in MM patient samples in the FIMM dataset (n = 122) (12/21)

| Gene symbol | <i>NAALADLI</i> | <i>NPEPLI</i>   | <i>NPEPPS</i>   | <i>PEPD</i>     | <i>PGPEPI</i>   | <i>RNPEP</i>    | <i>RNPEPLI</i>  | <i>TPPI</i>     | Gene symbol |
|-------------|-----------------|-----------------|-----------------|-----------------|-----------------|-----------------|-----------------|-----------------|-------------|
| Sample_ID   | ENSG00000168060 | ENSG00000215440 | ENSG00000141279 | ENSG00000124299 | ENSG00000130517 | ENSG00000176393 | ENSG00000142327 | ENSG00000166340 | ENSEMBL ID  |
| MM014_4     | -5.12378403     | 0.201517295     | 3.166754761     | 2.05734505      | 2.546474188     | 3.663266262     | 1.541642958     | 2.715440068     |             |
| MM014_2     | -10.13140863    | 0.160675385     | 1.78859466      | 2.11105131      | 2.526910996     | 1.784840309     | -0.019735977    | 1.226562872     |             |
| MM017_1     | -6.397594851    | -0.664099474    | 1.118661899     | 1.250381286     | 1.913607979     | 1.955149316     | -1.488522835    | 0.435480156     |             |
| MM017_2     | -2.749829144    | 0.191798228     | 1.26563279      | 1.544078037     | 2.43056925      | 1.953465521     | -0.56833039     | 1.42328036      |             |
| MM017_3     | -5.094324277    | -1.116907783    | 1.915403327     | 1.664040568     | 1.867818421     | 3.061665496     | -0.41559163     | 1.787292754     |             |
| MM018       | -4.376035825    | 1.220490574     | 2.812871558     | 0.710987103     | 0.94495191      | 1.661640289     | 0.363361845     | 2.914454292     |             |
| MM019       | -0.038817151    | 0.095177928     | 1.657153615     | 2.004110381     | 1.586017526     | 0.933074718     | -0.548527424    | 1.793339754     |             |
| MM020       | -1.511210353    | 0.415064321     | 2.315379265     | 1.838184207     | 2.476193815     | 2.16360711      | 0.380869957     | 1.768543745     |             |
| MM022_1     | -1.377261168    | 1.698627321     | 2.40361968      | 3.518950741     | 2.616064085     | 2.644870747     | 2.727930362     | 3.8852361       |             |
| MM022_3     | -5.825376856    | -0.946647641    | 2.81789569      | 1.908875227     | 1.341004959     | 1.264996616     | 0.18244628      | 4.057868816     |             |
| MM024       | -2.835777366    | 1.545518565     | 2.667859353     | 2.090748888     | 2.190380841     | 1.769662273     | 0.808481596     | 1.961420029     |             |
| MM025_1     | -4.96245163     | 0.245726823     | 1.680375828     | 1.413338348     | 1.138836786     | 1.732355638     | -0.576643574    | 0.583911955     |             |
| MM036_1     | -1.959987958    | -0.758329866    | 2.196061416     | 1.747527367     | 1.286121664     | 1.627353971     | -2.583507341    | -1.246983195    |             |
| MM036_2     | -2.748730384    | -0.362794806    | 2.43984435      | 1.222655486     | 1.245907181     | 1.071654314     | -1.796815089    | 0.59447726      |             |
| MM038       | -3.678964723    | -0.191599083    | 2.087920919     | 1.640316188     | 1.953707416     | 1.22412726      | -1.400602422    | -0.370659403    |             |
| MM039       | -1.240100874    | 2.450371516     | 2.436220018     | 1.744139685     | 1.730448426     | 0.887365559     | 0.136918003     | 1.8134582       |             |
| MM049       | -2.8637663      | 0.997447475     | 2.117817075     | 0.943919261     | 1.778306469     | 0.341716016     | -0.549770741    | 1.550700074     |             |
| MM071       | -2.861277027    | 0.739279649     | 1.650372335     | 1.08162729      | 1.373422678     | 1.248116367     | 0.817213522     | 1.692631488     |             |
| MM080       | -3.543657018    | -0.539505007    | 2.136196026     | 1.24071123      | 1.062296873     | 1.623525265     | -0.167778851    | 1.556394748     |             |
| MM081       | -3.842783716    | 1.256114876     | 3.262619077     | 1.349833043     | 2.320224925     | 3.18882006      | 1.715979637     | 2.106365062     |             |
| MM082       | -4.584482386    | -0.649169642    | -0.02438519     | 0.998757096     | 1.460043456     | -0.244407078    | -1.93968064     | -1.23087675     |             |
| MM098       | -2.421560669    | 1.276108075     | 2.865802399     | 2.164783851     | 1.261159028     | 2.731249616     | 0.554740499     | 1.97122729      |             |
| MM102       | -3.578980112    | 0.74921145      | 2.194153674     | 1.559291387     | 1.122220179     | 2.715059891     | 0.313145861     | 2.757335989     |             |
| MM109       | -4.996818283    | 0.02521592      | 2.517333696     | 1.240004055     | 0.162269175     | 2.833673931     | -0.637308911    | 1.255863082     |             |
| MM111_1     | -9.824865118    | 0.16779915      | 2.438018346     | 1.081550372     | 1.269224855     | 3.78416003      | -0.128909035    | -0.078403914    |             |
| MM111_2     | -5.905720096    | 0.984151709     | 3.743501009     | 1.291454256     | 1.634920371     | 3.728106565     | 1.568934573     | 1.042101477     |             |
| MM113_2     | -2.426868846    | 0.781078995     | 1.633670516     | 2.364443734     | 1.240241287     | 2.958823629     | -0.04444585     | 1.509203892     |             |
| MM117_2     | -7.156460745    | -0.146889142    | 1.845225516     | 1.768897776     | 0.98307114      | 2.227681662     | -0.196240031    | -0.111132363    |             |
| MM124       | -5.660622062    | -0.297704385    | 1.688580826     | 1.274110293     | 1.628499438     | 1.071975009     | -1.082879047    | -0.576564139    |             |
| MM129       | -4.222724142    | 0.541349908     | 2.57829901      | 1.640295621     | 2.064175367     | 3.434698309     | 1.011965774     | 2.354623075     |             |
| MM135       | -0.676215004    | 0.376262258     | 2.400837024     | 1.916737322     | 3.05013017      | 1.575455929     | -0.564871588    | 0.142966097     |             |
| MM137       | -3.915374825    | -0.842711342    | 1.108675789     | 1.208419678     | 2.420284022     | 1.209620708     | -1.524117921    | 0.271729897     |             |
| MM006       | -3.278435828    | -0.178914008    | 1.197686669     | 2.023444957     | 1.564806724     | 2.60606951      | -1.236105983    | 0.178459532     |             |
| MM008       | -3.369365802    | 1.229254762     | 2.990429875     | 1.706258561     | 1.46506576      | 2.141563305     | 1.172280369     | 1.239098832     |             |

Supplementary Table S5. log2(RPKM) expression values for 39 aminopeptidases genes and 17 housekeeping genes in MM patient samples in the FIMM dataset (n = 122) (13/21)

| Gene symbol    | Aminopeptidase genes |                 |                 |                 |                 | Housekeeping genes |                  |                   | Gene symbol |
|----------------|----------------------|-----------------|-----------------|-----------------|-----------------|--------------------|------------------|-------------------|-------------|
|                | <i>TPP2</i>          | <i>TRHDE</i>    | <i>XPNPEP1</i>  | <i>XPNPEP2</i>  | <i>XPNPEP3</i>  | <i>ABCF1</i>       | <i>ACTB</i>      | <i>ALAS1</i>      |             |
| Sample_ID      | ENSG00000134900      | ENSG00000072657 | ENSG00000108039 | ENSG00000122121 | ENSG00000196236 | ENSG00000204574    | ENSG00000075624  | ENSG00000023330   | ENSEMBL_ID  |
| <b>MM032_1</b> | 3.011407013          | -2.840812767    | 1.953734202     | -4.273221559    | -0.226257169    | 3.24559661588632   | 6.96037800736663 | 1.2472109244613   |             |
| <b>MM051_1</b> | 3.445118395          | -5.896472984    | 2.747793963     | -4.525427123    | -0.918877511    | 3.56096114440767   | 7.2974798383447  | 2.5225310574189   |             |
| <b>MM053</b>   | 1.764428525          | -7.69888384     | 2.070615615     | -4.983883577    | -2.281845125    | 3.40814142840279   | 8.05798722424296 | 1.33790228951546  |             |
| <b>MM056_1</b> | 4.133894133          | -3.673063351    | 2.480129579     | -5.412441479    | -0.066676524    | 3.74346742570021   | 6.03666342709802 | 2.87738106132657  |             |
| <b>MM063</b>   | 3.266756233          | -5.220984658    | 1.970432873     | -10.16364638    | 1.568377167     | 4.06104473469052   | 6.0935462139343  | 2.05478841108064  |             |
| <b>MM064</b>   | 3.452285633          | -11.87174439    | 1.653441358     | -10.1001606     | -2.07416922     | 4.19885469278407   | 6.5942274174496  | 3.21814407507454  |             |
| <b>MM065</b>   | 4.615464434          | -1.171168438    | 2.94055072      | -4.19890225     | 0.042972694     | 4.49660377087986   | 6.63992988515032 | 2.34437493118945  |             |
| <b>MM066</b>   | 5.051752665          | -5.404283414    | 2.687684763     | -5.273157236    | 0.1454406       | 4.29329581674373   | 7.02731939697441 | 1.53567770365702  |             |
| <b>MM067</b>   | 4.002957622          | -8.772153286    | 2.199132511     | -6.083031656    | -0.286312816    | 3.66208692066372   | 8.24558341549583 | 2.62101603809064  |             |
| <b>MM070</b>   | 2.377952795          | -4.53777134     | 2.319210479     | -3.691333554    | 0.104400432     | 4.03884259817758   | 7.48243077914581 | 2.31210243381855  |             |
| <b>MM074</b>   | 3.863252702          | -6.352325168    | 2.939086438     | -7.433184188    | -0.271468532    | 3.70935687692464   | 6.90376576265991 | 1.44524391719938  |             |
| <b>MM075</b>   | 3.68105197           | -8.324710554    | 1.971558474     | -5.782608609    | -0.248043027    | 4.6042239183602    | 5.97968777019744 | 1.91729796277638  |             |
| <b>MM078_1</b> | 3.857244256          | -5.551150076    | 2.944976808     | -10.87759837    | 0.055688236     | 3.19444808363451   | 6.49180386827821 | 3.2125681989203   |             |
| <b>MM085</b>   | 4.316285652          | -3.578044201    | 2.544317438     | -4.03675803     | -0.609271568    | 3.29130023555254   | 6.58321119158007 | 1.05403191575401  |             |
| <b>MM086</b>   | 2.900891435          | -7.411134909    | 1.989502735     | -3.228124872    | 0.807132231     | 4.81646839836315   | 8.4776662811831  | 2.04751266251996  |             |
| <b>MM087</b>   | 4.584459001          | -11.28496712    | 3.043227092     | -6.34345833     | 1.053397727     | 4.1757825141209    | 6.65234756509436 | 2.94894919310529  |             |
| <b>MM088</b>   | 2.911557944          | -7.26621505     | 0.771957471     | -10.53902538    | -0.326789499    | 3.70765582290545   | 6.53673871961377 | 0.997907402801395 |             |
| <b>MM089</b>   | 4.467756495          | -5.183148941    | 2.60937429      | -4.389538843    | 0.218243583     | 3.76041056145067   | 6.74966020013408 | 1.34941002370988  |             |
| <b>MM090</b>   | 4.234005082          | -6.689147923    | 3.109866654     | -7.453617032    | 0.150440784     | 4.37668218513828   | 6.07608915194486 | 1.63835220555715  |             |
| <b>MM093</b>   | 3.409778096          | -4.03571765     | 2.52968356      | -10.41895197    | 0.03804903      | 4.12816864088083   | 8.17786353107524 | 2.02062127610502  |             |
| <b>MM094</b>   | 4.405195807          | -7.490402931    | 2.396642772     | -3.092036463    | 0.73665813      | 4.50903450449253   | 6.56784769440085 | 1.60469343644725  |             |
| <b>MM096</b>   | 4.776713203          | -9.385724351    | 2.732600622     | -10.78406556    | 0.856429179     | 4.71851592068368   | 6.47272108873626 | 1.31599927168514  |             |
| <b>MM101</b>   | 4.266391238          | -4.741042226    | 2.271054074     | -9.888321672    | -0.182110106    | 4.83141062332908   | 6.63162481076533 | 2.18056836575089  |             |
| <b>MM114</b>   | 3.052282088          | -11.85623313    | 1.803253708     | -5.040255224    | 0.89115852      | 3.22281489876044   | 6.62370922258413 | 1.92945420126461  |             |
| <b>MM115</b>   | 4.623321893          | -9.694082327    | 2.957777635     | -10.24442663    | -0.064561709    | 4.72274748796174   | 6.40998816306183 | 2.40307825626753  |             |
| <b>MM117_1</b> | 2.610053232          | -12.28712641    | 1.62122041      | -7.345617619    | -0.995047656    | 2.67641687435691   | 5.85199914423668 | 1.97197212932144  |             |
| <b>MM118</b>   | 4.1377878            | -4.527113593    | 2.755275458     | -9.164920738    | -0.231903872    | 3.43111879858484   | 6.22462732394046 | 2.56725137007004  |             |
| <b>MM119</b>   | 2.482989149          | -11.84904846    | 1.973688186     | -7.75553657     | -1.219755195    | 2.77193006282202   | 9.31623438452382 | 1.11270176935053  |             |
| <b>MM121</b>   | 4.545889866          | -6.372175704    | 2.490921509     | -3.843863064    | -0.011738405    | 3.69273437606265   | 6.88544764086564 | 1.81438704109966  |             |
| <b>MM122</b>   | 4.131233301          | -5.287580688    | 2.832343896     | -3.706518803    | -1.231170064    | 3.37496119725216   | 7.36454619782611 | 3.15160873299272  |             |
| <b>MM123</b>   | 5.311166188          | -5.667306596    | 3.011070497     | -3.638564965    | -0.172685768    | 4.49452437562744   | 6.56600296052359 | 2.09493235368946  |             |
| <b>MM126</b>   | 3.45343349           | -8.384598309    | 2.273892542     | -5.695476678    | -0.297332583    | 3.27719586875901   | 6.94943268362347 | 2.15404377374643  |             |
| <b>MM128_1</b> | 4.153952442          | -9.045585662    | 2.000719954     | -10.44392687    | -2.683805462    | 3.05236446142949   | 5.6894635693427  | 1.80918380788496  |             |
| <b>MM131</b>   | 4.423788763          | -12.00580641    | 2.461291353     | -10.23422262    | 0.951767439     | 4.44693376234464   | 7.37950508371029 | 2.43055656175823  |             |
| <b>MM132</b>   | 4.129483066          | -4.795732288    | 1.175657498     | -4.523502282    | -2.042489384    | 2.22781834158281   | 4.99435375294729 | 1.48752547618373  |             |
| <b>MM133</b>   | 3.815061584          | -8.758292012    | 1.941406533     | -3.966808663    | -1.068272068    | 1.97850889696971   | 6.65515538914022 | 1.96682474635592  |             |
| <b>MM134</b>   | 2.941752142          | -11.86922451    | 1.44043699      | -10.87621874    | -0.66294891     | 3.13199841559433   | 7.27797621689806 | 2.06108194343084  |             |
| <b>MM136</b>   | 4.677611015          | -11.42957145    | 2.289215249     | -9.65798766     | -0.394650535    | 3.78877096295582   | 6.48237576736036 | 1.63097572614416  |             |
| <b>MM138</b>   | 2.896506713          | -12.25754384    | 1.541526833     | -6.785520336    | 0.429960818     | 3.36426643838489   | 6.88476047337684 | 2.12636306712472  |             |
| <b>MM139</b>   | 3.187215727          | -3.567460204    | 1.749809989     | -7.857172592    | -1.466938411    | 3.81216412836965   | 6.24262307266849 | 1.90861560935316  |             |
| <b>MM140</b>   | 4.047980379          | -8.492415267    | 2.012989645     | -9.890756477    | -0.428885933    | 3.34027668003763   | 6.41762944228324 | 1.59987536752465  |             |
| <b>MM026</b>   | 2.662140985          | -5.927762122    | 2.924083351     | -5.7021467      | -0.321529868    | 3.54917425466503   | 5.69270241040316 | 1.55602918771219  |             |
| <b>MM027</b>   | 3.365464472          | -12.19883608    | 2.513726113     | -7.257327287    | -0.466978658    | 5.11376980086037   | 7.88625061647482 | 2.39976570405575  |             |
| <b>MM028</b>   | 4.202936557          | -2.457830811    | 2.324375041     | -3.449759768    | -0.212227492    | 3.37792971619463   | 7.58897866099255 | 2.10694169382992  |             |

Supplementary Table S5. log2(RPKM) expression values for 39 aminopeptidases genes and 17 housekeeping genes in MM patient samples in the FIMM dataset (n = 122) (14/21)

| Gene symbol | <i>TPP2</i>     | <i>TRHDE</i>    | <i>XPNPEP1</i>  | <i>XPNPEP2</i>  | <i>XPNPEP3</i>  | <i>ABCF1</i>     | <i>ACTB</i>      | <i>ALASI</i>     | Gene symbol |
|-------------|-----------------|-----------------|-----------------|-----------------|-----------------|------------------|------------------|------------------|-------------|
| Sample_ID   | ENSG00000134900 | ENSG00000072657 | ENSG00000108039 | ENSG00000122121 | ENSG00000196236 | ENSG00000204574  | ENSG00000075624  | ENSG00000023330  | ENSEMBL ID  |
| MM030_1     | 4.93698699      | -6.927530861    | 3.327658743     | -3.515489457    | 0.50510881      | 5.48111388581112 | 6.13132215310727 | 2.53936808750813 |             |
| MM030_2     | 4.070586018     | -12.03645176    | 2.879166434     | -4.075043406    | -0.218284241    | 3.34364930297205 | 8.04027049846687 | 2.91782279574533 |             |
| MM031_2     | 3.941687513     | -12.44038691    | 2.372983581     | -3.657575859    | -1.405465989    | 1.88552761267273 | 5.46355142015444 | 2.67040213867297 |             |
| MM033_4     | 4.355291417     | -4.619593778    | 3.315893975     | -5.510975       | 0.836719636     | 5.33967978993212 | 6.44420397844458 | 2.72421377249021 |             |
| MM033_1     | 4.57669183      | -6.268075267    | 3.308719951     | -8.583954317    | 0.868913421     | 4.66645500230302 | 7.26946226408015 | 2.72711977083584 |             |
| MM033_2     | 4.206033623     | -4.911834282    | 2.870854031     | -9.070987828    | 0.332892454     | 4.332741460803   | 6.73470823786078 | 2.89016683689775 |             |
| MM034_2     | 4.091111494     | -1.776654617    | 3.693075763     | -2.31047539     | -1.047263493    | 2.65341540852458 | 8.81329289311382 | 2.89583975515396 |             |
| MM034_1     | 3.377850446     | -4.509138811    | 2.17889237      | -5.215602317    | -0.218346925    | 4.51510813317046 | 8.15266656499034 | 2.26680167827351 |             |
| MM037       | 3.627995993     | -5.866625638    | 2.07549436      | -6.75800686     | -0.894875851    | 2.10861383302995 | 6.02369785583813 | 2.11853967357081 |             |
| MM041       | 4.915590357     | -3.890520062    | 2.963029851     | -5.845254621    | 0.593153344     | 4.62814099370706 | 6.972701985871   | 2.09098169567398 |             |
| MM042       | 3.424755481     | -4.454150763    | 2.901235383     | -3.96944812     | 0.202885891     | 4.09908601067303 | 7.47271785239059 | 2.8151144844108  |             |
| MM043_1     | 4.41740083      | -6.845222698    | 3.017962284     | -4.673100977    | 1.32584353      | 3.91372409227887 | 6.64372332111756 | 2.1465830046573  |             |
| MM043_2     | 4.546222257     | -5.216258903    | 3.156756312     | -1.911242912    | 1.312669296     | 4.51403537751017 | 7.60980244160383 | 2.61821022268171 |             |
| MM044       | 4.018180022     | -2.061844866    | 3.12611683      | -6.916375683    | -0.287177032    | 3.61565554192463 | 8.07438486716013 | 2.34175684899821 |             |
| MM045       | 4.528306483     | -4.737917217    | 2.887891914     | -3.595814593    | 0.065403731     | 4.98688959125055 | 7.98237515252393 | 2.85757317447125 |             |
| MM046_1     | 4.818799918     | -0.255022121    | 2.664899809     | -2.530180969    | 0.871747376     | 4.62354021969656 | 7.65549226207632 | 2.81384011588497 |             |
| MM046_2     | 4.774187512     | -2.383595027    | 2.751025174     | -6.117069871    | 0.735101415     | 5.19152930995341 | 7.90408369460119 | 2.99865823950312 |             |
| MM048_2     | 4.046481241     | -12.11256782    | 1.316839667     | -10.34098403    | -0.097087614    | 5.16496021484653 | 7.53932404975748 | 1.81773863833366 |             |
| MM050       | 3.504638888     | -6.358565805    | 2.919521204     | -4.40056889     | -0.725553096    | 4.70701901925251 | 5.53930513939318 | 1.57921425776793 |             |
| MM051_2     | 4.919655208     | -7.325588422    | 3.537013341     | -3.232076536    | -0.655002292    | 3.8691107968386  | 6.95908961992365 | 2.00558379366001 |             |
| MM054       | 1.964201853     | -6.731274099    | 2.315064193     | -6.117231585    | -1.113355111    | 3.00792962735413 | 6.61408293470023 | 1.93079604069144 |             |
| MM056_2     | 4.352671291     | -12.05465234    | 3.083632168     | -10.28306855    | 0.080948108     | 4.46793270475121 | 7.00897266704445 | 2.86845099029819 |             |
| MM057_4     | 5.312987445     | -11.03054899    | 3.685463937     | -9.258965201    | 1.190511947     | 5.50075498022874 | 6.86046447572921 | 2.30189121452583 |             |
| MM057_5     | 4.446968901     | -6.811750347    | 3.5814722255    | -6.47842969     | 0.457842969     | 5.02486006801969 | 6.30127701899673 | 2.85349912828679 |             |
| MM057_6     | 4.588776105     | -12.4054183     | 3.259286254     | -10.63383451    | 0.634856647     | 3.55615519245057 | 6.12506972695994 | 2.8041248832771  |             |
| MM057_1     | 4.795311139     | -6.349454992    | 3.338537701     | -3.599897508    | 1.588858654     | 6.02228782156641 | 7.24064155004523 | 2.22028765090947 |             |
| MM057_2     | 4.149992478     | -2.977759885    | 3.470747642     | -3.766616275    | 0.860712051     | 4.84359822858367 | 8.37928556423049 | 3.1884150807422  |             |
| MM057_3     | 4.435784827     | -7.265620532    | 3.412894403     | -10.70349011    | 1.861638329     | 4.92915813508374 | 6.84792000440369 | 2.17837141651631 |             |
| MM058_1     | 4.803211077     | -4.212444135    | 3.088907879     | -4.093887119    | 1.142875061     | 4.23627565424522 | 6.45248423143632 | 3.17396784193094 |             |
| MM059       | 4.329571678     | -8.686927113    | 3.115654188     | -10.08526832    | 0.310413697     | 3.95691329481672 | 6.21752686161239 | 2.37847480504637 |             |
| MM060       | 3.338763289     | -12.04549189    | 2.967164306     | -7.103983101    | -1.69638776     | 3.41694717978468 | 6.04019924762178 | 2.54761913114571 |             |
| MM061_1     | 3.715556828     | -2.770231291    | 2.159779265     | -3.991217295    | -0.660546889    | 2.62536207916491 | 5.85618832190499 | 1.81172396417327 |             |
| MM068_1     | 2.655064235     | -2.159114385    | 2.466912957     | -5.10932731     | 0.224274865     | 3.65134444369025 | 7.71007033026749 | 1.32994598981575 |             |
| MM068_2     | 3.274807014     | -3.27364419     | 2.396680745     | -3.692601571    | -0.381199098    | 3.28041160593831 | 6.43218646169226 | 1.64862012253239 |             |
| MM091       | 5.231216757     | -6.009107157    | 3.717990924     | -10.25989118    | -0.344789477    | 5.83225460326554 | 5.99650921894902 | 2.05079103154485 |             |
| MM095       | 3.706605619     | -12.06305632    | 2.04293336      | -7.121547528    | 1.292418859     | 4.72085489484467 | 7.80410977014066 | 2.09107266050421 |             |
| MM002_1     | 2.900986793     | -2.352195536    | 1.689039069     | -3.882424479    | -0.997907975    | 2.67383238131506 | 5.99471526721365 | 1.9656812168432  |             |
| MM002_2     | 2.792435415     | -6.429190374    | 1.631429695     | -6.571876709    | -0.87467821     | 2.99721226697655 | 7.09990402078269 | 2.63361237117651 |             |
| MM002_3     | 2.823996417     | -12.22129003    | 1.571258344     | -7.279781237    | -0.85639607     | 2.40873646561422 | 6.85633689055663 | 2.29267194068513 |             |
| MM003       | 4.45206639      | -4.879672053    | 3.642457452     | -5.795148951    | 1.460305234     | 4.83303683730214 | 6.89152014442591 | 2.99103820861685 |             |
| MM005       | 4.902402546     | -2.232322933    | 2.815191218     | -7.006776131    | -0.856153443    | 4.28215490258318 | 7.35644481827347 | 3.29950103397489 |             |
| MM007       | 3.640558296     | -7.34004084     | 2.328262711     | -9.655919891    | 0.004100961     | 3.77475164640274 | 7.17674648209718 | 2.50280277401791 |             |
| MM010       | 4.62034916      | -12.15931042    | 2.521817993     | -2.599824072    | 0.897965103     | 4.29359972696081 | 6.15293008105401 | 3.11684939420142 |             |
| MM011       | 4.264347739     | -11.77241827    | 3.327054135     | -10.00083448    | 0.667960532     | 6.18958820850488 | 7.92534939331229 | 2.92467754845321 |             |



Supplementary Table S5. log2(RPKM) expression values for 39 aminopeptidases genes and 17 housekeeping genes in MM patient samples in the FIMM dataset (n = 122) (15/21)

| Gene symbol    | <i>TPP2</i>     | <i>TRHDE</i>    | <i>XPNPEP1</i>  | <i>XPNPEP2</i>  | <i>XPNPEP3</i>  | <i>ABCF1</i>     | <i>ACTB</i>      | <i>ALASI</i>      | Gene symbol |
|----------------|-----------------|-----------------|-----------------|-----------------|-----------------|------------------|------------------|-------------------|-------------|
| Sample_ID      | ENSG00000134900 | ENSG00000072657 | ENSG00000108039 | ENSG00000122121 | ENSG00000196236 | ENSG00000204574  | ENSG00000075624  | ENSG00000023330   | ENSEMBL ID  |
| <b>MM014_4</b> | 3.868870336     | -6.821240838    | 3.597916377     | -6.31974621     | 1.393245978     | 4.00202092569255 | 8.04652078988157 | 3.29435278884074  |             |
| <b>MM014_2</b> | 2.648327128     | -3.280936422    | 2.115311733     | -5.064999564    | 0.054136109     | 3.39894691240249 | 7.94897319922125 | 2.51084631923189  |             |
| <b>MM017_1</b> | 4.052443476     | -8.34777369     | 3.051258998     | -6.189166776    | -0.210235145    | 3.94479233346429 | 5.98024615326614 | 2.94493534873198  |             |
| <b>MM017_2</b> | 3.917087139     | -5.230522699    | 2.877484264     | -5.154932722    | 0.719909645     | 4.87007643120177 | 6.69632279642015 | 3.03369902156793  |             |
| <b>MM017_3</b> | 4.220715835     | -11.04979742    | 3.052094944     | -5.190750783    | 1.337789949     | 4.67779913243436 | 7.34064679105686 | 3.28231322070191  |             |
| <b>MM018</b>   | 4.260064142     | -0.965385481    | 2.313843061     | -2.553790386    | 0.860283166     | 4.36141203827985 | 6.9533070570274  | 2.23650450038181  |             |
| <b>MM019</b>   | 4.276868852     | -3.990243456    | 2.751115847     | -6.306122506    | -0.040817829    | 3.3073652241464  | 5.9038284331888  | 2.43014069818205  |             |
| <b>MM020</b>   | 4.302131296     | -4.618212716    | 1.7989685       | -7.174095203    | 0.95751003      | 4.27778436118815 | 6.51819790904272 | 3.21836899216053  |             |
| <b>MM022_1</b> | 3.098295138     | -10.72831944    | 3.157735497     | -4.312879462    | 0.811271015     | 4.94837251946737 | 8.613889825974   | 2.22316853371684  |             |
| <b>MM022_3</b> | 2.953686543     | -6.431601294    | 2.486296365     | -9.704411622    | 0.504263144     | 3.67479946814804 | 7.15635983180738 | 0.569352729223172 |             |
| <b>MM024</b>   | 4.813581541     | 0.2549245       | 2.866720425     | -1.516705227    | 0.492718892     | 4.82945832797556 | 6.59181660090292 | 2.43023289116777  |             |
| <b>MM025_1</b> | 5.076317643     | -11.57000147    | 1.8311031       | -9.798417674    | 0.397723516     | 4.33430261697006 | 6.34991043153092 | 1.47132017431641  |             |
| <b>MM036_1</b> | 3.535576793     | -7.978712653    | 1.777042783     | -10.2945917     | -1.319045743    | 3.96808089765936 | 5.53196309767626 | 2.85429958023427  |             |
| <b>MM036_2</b> | 3.366173886     | -5.479180845    | 1.807530299     | -9.638334391    | -1.044341614    | 4.47989449132922 | 6.00134710069923 | 2.35051770390846  |             |
| <b>MM038</b>   | 3.200452034     | -5.272981403    | 2.108250928     | -6.945316231    | -0.927560999    | 3.38259505290136 | 7.02842410578549 | 1.73722786318937  |             |
| <b>MM039</b>   | 4.414591708     | -12.23996813    | 1.767456238     | -4.446016528    | -0.277648196    | 4.66815313954843 | 7.17179069280536 | 1.84855516360173  |             |
| <b>MM049</b>   | 4.579118927     | -11.19510634    | 2.36292337      | -9.42352255     | -0.640472003    | 3.32240885807162 | 6.90452600472229 | 3.21900859368182  |             |
| <b>MM071</b>   | 3.740425708     | -6.880661929    | 2.881663652     | -10.46663014    | -0.491608132    | 4.77806836656544 | 7.06127348060372 | 1.94397961849586  |             |
| <b>MM080</b>   | 3.51576309      | -8.757066695    | 3.140120948     | -10.15540791    | 0.887930721     | 3.54755327484694 | 6.8526458042736  | 2.81247262311976  |             |
| <b>MM081</b>   | 4.854190294     | -8.575864433    | 2.829547516     | -9.974205643    | -0.033118488    | 4.07035633242298 | 6.51653420678398 | 2.8150563890928   |             |
| <b>MM082</b>   | 3.224648982     | -12.55702904    | 1.69608954      | -10.78544525    | -1.066661095    | 2.82092528639252 | 7.21666033921704 | 2.05031472338632  |             |
| <b>MM098</b>   | 5.494956475     | -5.921785129    | 3.249668305     | -4.863897153    | -0.992293968    | 3.659175866456   | 5.82580790021557 | 2.42922995030775  |             |
| <b>MM102</b>   | 4.584876693     | 0.132961383     | 3.920264498     | -2.643891451    | -0.027301883    | 3.67587341038938 | 10.0117387243157 | 1.83114955579854  |             |
| <b>MM109</b>   | 3.828174164     | -6.300886778    | 2.662074888     | -7.549202544    | -0.873404928    | 3.91889444042804 | 5.71381913312474 | 2.79637157560321  |             |
| <b>MM111_1</b> | 4.399627903     | -7.300557992    | 3.136181076     | -9.616437043    | 1.086930528     | 3.77529299295699 | 5.81343885755134 | 3.41465506406085  |             |
| <b>MM111_2</b> | 5.163990515     | -8.847387435    | 3.655109462     | -9.397731739    | 1.651592148     | 4.54954379092509 | 6.419183817207   | 3.09116921824731  |             |
| <b>MM113_2</b> | 5.078185004     | -5.357533691    | 2.744465405     | -2.086596115    | 0.667168839     | 4.64976458346448 | 9.3067835103956  | 2.76088943541333  |             |
| <b>MM117_2</b> | 4.069486415     | -6.587166165    | 2.645554519     | -7.478547387    | -0.121171401    | 3.62483868651442 | 6.37777381889518 | 2.98703528982669  |             |
| <b>MM124</b>   | 3.99091541      | -8.345768302    | 2.515028971     | -7.491722351    | -0.197161538    | 2.98044096745263 | 7.06360700853014 | 1.1391013892749   |             |
| <b>MM129</b>   | 5.159498559     | -7.973506861    | 2.724813916     | -5.284385231    | 0.06284374      | 4.86769419496972 | 7.68502228487962 | 2.45544391086412  |             |
| <b>MM135</b>   | 6.502120812     | -8.366361925    | 2.713132092     | -5.677240294    | 0.106021518     | 4.42433054409627 | 6.77978763944024 | 2.6604610499812   |             |
| <b>MM137</b>   | 3.764196217     | -6.549915174    | 2.38932899      | -10.88685584    | -1.52724803     | 2.92258395412685 | 5.58237085493238 | 2.02218277521354  |             |
| <b>MM006</b>   | 2.875558191     | -12.24247098    | 1.019724076     | -10.47088719    | -0.629757318    | 3.1718995610789  | 6.17308625842594 | 1.37166578243047  |             |
| <b>MM008</b>   | 4.82090679      | -4.620308578    | 3.287319736     | -4.547216233    | 0.063323441     | 4.43147038343367 | 7.68901337629311 | 1.97229535381589  |             |

Supplementary Table S5. log<sub>2</sub>(RPKM) expression values for 39 aminopeptidases genes and 17 housekeeping genes in MM patient samples in the FIMM dataset (*n* = 122) (16/21)

| Gene symbol    | Housekeeping genes |                    |                  |                  |                   |                  |                  |                   | Gene symbol |
|----------------|--------------------|--------------------|------------------|------------------|-------------------|------------------|------------------|-------------------|-------------|
|                | <i>CLTC</i>        | <i>G6PD</i>        | <i>GAPDH</i>     | <i>GUSB</i>      | <i>HPRT1</i>      | <i>LDHA</i>      | <i>PGKI</i>      | <i>POLR1B</i>     |             |
| Sample ID      | ENSG00000141367    | ENSG00000160211    | ENSG00000111640  | ENSG00000169919  | ENSG00000165704   | ENSG00000134333  | ENSG00000102144  | ENSG00000125630   | ENSEMBL ID  |
| <b>MM032_1</b> | 3.56951612495665   | 0.930889934423915  | 6.30059091471253 | 2.69537343855205 | 1.24452007505547  | 4.52977785737859 | 4.42290060580197 | 0.762665249241917 |             |
| <b>MM051_1</b> | 3.24077204198667   | 0.981858772523486  | 6.53067654295999 | 3.29850164827529 | 0.527234612306259 | 4.99699172903846 | 3.99725130349479 | 0.258024068461999 |             |
| <b>MM053</b>   | 2.45183772755119   | 1.25509033950066   | 7.35066109233487 | 1.54060514220152 | 0.211382553937821 | 4.43988700689476 | 4.56905334052872 | 0.717923192919615 |             |
| <b>MM056_1</b> | 4.86329557699317   | -0.324589719042922 | 6.85299428120268 | 2.84356152653739 | 0.638345408423199 | 4.86667372885553 | 5.00684761651898 | 2.62301771331325  |             |
| <b>MM063</b>   | 4.25650495750469   | 0.048447204284162  | 5.75891953612445 | 2.87014607026288 | 0.816062142840675 | 5.04505270704376 | 4.27925667815306 | 2.20769149720021  |             |
| <b>MM064</b>   | 3.40318786224311   | 0.93575367243078   | 5.55939818346135 | 4.17673265844657 | 3.58247270234512  | 5.40731079457087 | 4.65356602399763 | 2.63264269140374  |             |
| <b>MM065</b>   | 4.90092662195435   | 0.640254543602264  | 6.00716648930756 | 3.38172954699413 | 3.17068256196627  | 5.72214544745329 | 4.35961307927262 | 2.43779377008345  |             |
| <b>MM066</b>   | 4.44794681207397   | -0.049832728354314 | 5.41015787645259 | 3.48528139649519 | 1.44241150384895  | 4.63913686454978 | 4.58985537834014 | 2.19335238993386  |             |
| <b>MM067</b>   | 2.71182616540584   | -0.275459383513566 | 6.11755359329303 | 3.09469053816694 | 0.22502117224736  | 4.63812695531604 | 4.05598413404758 | 1.15510283965066  |             |
| <b>MM070</b>   | 4.13065133917334   | 0.25009954877674   | 5.68324984970369 | 2.95449881117165 | 0.504885794523375 | 5.09068985739168 | 4.21267412143216 | 1.50113706924601  |             |
| <b>MM074</b>   | 4.04847724571645   | 1.09825917914901   | 5.83792176132872 | 2.72394205243987 | 1.10924732876616  | 4.69055855078382 | 4.25301938154333 | 1.26784744488929  |             |
| <b>MM075</b>   | 3.7132192427809    | 0.874252860581185  | 5.369585133378   | 1.65874891254782 | 2.4619206805445   | 4.4631172397707  | 4.43081255747748 | 1.78396301956444  |             |
| <b>MM078_1</b> | 4.69648227888646   | 1.54379347916254   | 6.78566180619908 | 3.87190263733399 | 1.4231141403605   | 6.75185859954119 | 5.07489308320408 | 1.82296723737699  |             |
| <b>MM085</b>   | 3.22053764141627   | -0.656971879917354 | 5.562769624309   | 1.59543081974979 | 1.08896716772429  | 3.97941740259767 | 3.8548433706405  | 1.14728511316225  |             |
| <b>MM086</b>   | 3.90978104557219   | 1.71140176426473   | 5.87789508869148 | 3.00421472021853 | 2.63536920217328  | 5.98113061330102 | 4.81014056804645 | 2.03642765124524  |             |
| <b>MM087</b>   | 5.26232851574068   | -0.202595982174363 | 6.98072890729986 | 3.73422183182549 | 2.70098289897804  | 5.79783012840271 | 5.38561697683609 | 2.7799938653759   |             |
| <b>MM088</b>   | 3.10998954110092   | -0.69640472894833  | 5.03547591570401 | 1.94032433477261 | 1.2063084631137   | 4.44182061284187 | 3.53034411241071 | 0.573938503667025 |             |
| <b>MM089</b>   | 4.10526430739956   | -0.106097320344371 | 4.85604017382879 | 2.38788694198549 | 0.785005997196098 | 3.98594030536029 | 3.59924024326794 | 1.2057999952768   |             |
| <b>MM090</b>   | 4.87723426241207   | -0.67682611913113  | 5.67990200223337 | 2.43264004660273 | 1.4628287255876   | 5.2265676408451  | 4.79930497626898 | 2.53615225283171  |             |
| <b>MM093</b>   | 4.39902452753975   | 0.021914400887926  | 7.18187163305547 | 3.76231911490294 | 1.34795528464357  | 5.89185144554959 | 5.18335652165933 | 1.03504883108361  |             |
| <b>MM094</b>   | 3.91223479979999   | 0.44207922172174   | 6.46447409047065 | 3.47576342713141 | 1.03114205223096  | 5.25581726413854 | 4.36465765996553 | 1.95035076215982  |             |
| <b>MM096</b>   | 3.90120412789047   | 0.895886444509647  | 6.91351366803316 | 3.78341136972363 | 1.14471442072109  | 6.57939370060566 | 4.32021721563664 | 2.68865391162716  |             |
| <b>MM101</b>   | 4.23238165170858   | 0.476119287327575  | 6.28586591846428 | 3.34306591561405 | 1.78267788945268  | 5.53734559658098 | 4.78374671795904 | 1.78477702630303  |             |
| <b>MM114</b>   | 5.2544448415918    | 0.168181870197684  | 6.24397428377823 | 2.40793012726456 | 1.56328198428736  | 4.59618560300048 | 4.14629779359878 | 1.78289515026968  |             |
| <b>MM115</b>   | 4.8546453025031    | 0.192516703941239  | 5.74350580518722 | 3.03558555911041 | 1.4379701860404   | 4.8053554818     | 5.19895784981784 | 2.29286555241725  |             |
| <b>MM117_1</b> | 3.70552476520743   | -1.27503741946818  | 6.19902865368525 | 2.8484498546236  | 0.201439407372894 | 4.52471497186021 | 4.68142427711006 | 1.45499228871456  |             |
| <b>MM118</b>   | 4.81015437475786   | -0.375151971043462 | 6.4444244887483  | 2.40396210063149 | 2.18724638687951  | 5.35480472845106 | 4.51103588803647 | 2.56000826934812  |             |
| <b>MM119</b>   | 4.2481144474336    | -0.26480760699877  | 6.31650488047901 | 3.33559336888416 | 0.962553376377507 | 5.41300989691334 | 5.49560757781335 | 1.5529872528903   |             |
| <b>MM121</b>   | 4.27655822377149   | 0.608768284759931  | 5.89342603618743 | 2.43415202089654 | 1.55160549567154  | 4.3043664121447  | 4.46142487535092 | 0.790747875859635 |             |
| <b>MM122</b>   | 4.25901594278443   | 0.566115402297038  | 7.39181865951863 | 2.70713256599136 | 2.06937690682328  | 5.84481822233519 | 5.68854189182071 | 0.227298612758527 |             |
| <b>MM123</b>   | 4.19602287823804   | 1.03046459618432   | 6.32773775860178 | 2.66973367398856 | 2.15029741467583  | 4.88369231772388 | 4.75130588339575 | 2.33323116684258  |             |
| <b>MM126</b>   | 4.66313162247036   | -0.025836941211662 | 5.58741078284705 | 2.19879325942469 | 1.64340658021384  | 4.39636737108991 | 4.39767422111686 | 1.38376486791805  |             |
| <b>MM128_1</b> | 3.8113138180437    | -0.381670072359042 | 4.77636073465434 | 1.89306007198588 | 1.78605731839803  | 3.44184532156753 | 4.04593475202124 | 1.76501409250583  |             |
| <b>MM131</b>   | 4.427538451957     | 0.963452546759765  | 6.07275239741248 | 3.55482039944582 | 1.18759737099792  | 4.65634930854132 | 3.74656144265935 | 1.98211420880669  |             |
| <b>MM132</b>   | 4.26798093761769   | -1.21740688749993  | 5.18241318526525 | 2.17886205527559 | 1.09385610521263  | 4.22941323247836 | 3.9102197982269  | 1.47755107369363  |             |
| <b>MM133</b>   | 3.84781234389272   | 0.055460366286737  | 5.58374142929539 | 2.19010005223114 | 1.22379985216043  | 4.50913947675164 | 4.42401314163852 | 0.594686571591991 |             |
| <b>MM134</b>   | 3.84788627885769   | 0.671213442390422  | 6.85887126272318 | 3.04533838139992 | 2.49649482107272  | 5.99804209186832 | 4.84251948656707 | 1.65991401896761  |             |
| <b>MM136</b>   | 4.91498191259354   | -0.313302833259308 | 5.45492387418694 | 2.70995855523992 | 1.2715896113248   | 3.51978442450457 | 4.59853115327675 | 1.28545641449986  |             |
| <b>MM138</b>   | 4.36177915832861   | 0.322907417058925  | 6.30827320765551 | 2.30887961798103 | 0.837376235473863 | 4.8008958710264  | 4.51222387627888 | 1.69782192945266  |             |
| <b>MM139</b>   | 3.69891618342426   | -0.621928592827983 | 6.35853735487404 | 1.88068398352733 | 0.967164391736219 | 3.74595449132142 | 4.18626009544691 | 1.64636753486262  |             |
| <b>MM140</b>   | 4.2168595601178    | -0.121122267767305 | 5.39222345559328 | 2.05807851863229 | 0.993479844591587 | 3.20691044273248 | 3.91015499647163 | 0.780630983991152 |             |
| <b>MM026</b>   | 3.98173554210544   | 0.847027784201536  | 6.49763222795447 | 3.43479562579737 | 0.774424938491998 | 4.26415323841797 | 4.32062581821245 | 1.34554546667685  |             |
| <b>MM027</b>   | 3.8426614014515    | 1.26920198540438   | 6.73163284469243 | 2.51565129009211 | 1.44625148874801  | 6.12371106886393 | 4.91335955545212 | 1.62895514717604  |             |
| <b>MM028</b>   | 4.61438089212521   | 0.450155726108167  | 5.52098467108745 | 2.68532831731014 | 2.08909333839722  | 4.06915677313819 | 4.2725195441733  | 1.68980936721148  |             |

Supplementary Table S5. log2(RPKM) expression values for 39 aminopeptidases genes and 17 housekeeping genes in MM patient samples in the FIMM dataset (n = 122) (17/21)

| Gene symbol | <i>CLIC</i>       | <i>G6PD</i>        | <i>GAPDH</i>     | <i>GUSB</i>      | <i>HPRT1</i>       | <i>LDHA</i>      | <i>PGK1</i>      | <i>POLR1B</i>      | Gene symbol |
|-------------|-------------------|--------------------|------------------|------------------|--------------------|------------------|------------------|--------------------|-------------|
| Sample_ID   | ENSG00000141367   | ENSG00000160211    | ENSG00000111640  | ENSG00000169919  | ENSG00000165704    | ENSG00000134333  | ENSG00000102144  | ENSG00000125630    | ENSEMBL ID  |
| MM030_1     | 4.97040132012337  | 0.274685531145118  | 6.08193755502452 | 3.0965078516678  | 2.36523525761217   | 7.44151349262842 | 4.74909270454386 | 3.06388660826505   |             |
| MM030_2     | 4.83561328948955  | 2.4493208267282    | 7.77980161589432 | 3.2276017580656  | 2.28016722575176   | 6.63441122524828 | 6.20648561494381 | 1.90582200941656   |             |
| MM031_2     | 4.143490501021    | 0.170105942613542  | 4.59277590051852 | 2.31277328290075 | 1.94926984611589   | 3.52948745208247 | 4.38746165045903 | 2.27027914394476   |             |
| MM033_4     | 4.23537193500489  | 1.05719863495121   | 6.67659662502289 | 3.06487661309713 | 1.87191813416689   | 5.54735593425861 | 4.61995373683468 | 2.19961023722098   |             |
| MM033_1     | 4.27604532303557  | 1.68661971906757   | 8.27873864515566 | 3.78303441029277 | 0.795312000344542  | 5.33032699043863 | 4.96393666868266 | 2.26402863933298   |             |
| MM033_2     | 4.226267878353104 | 0.205086386291859  | 6.55399469540215 | 3.29216457966914 | 2.07710518231308   | 5.46648987439252 | 4.79082046690232 | 2.69208655377779   |             |
| MM034_2     | 4.56243532853495  | 2.34889881082723   | 7.37464672255347 | 2.62699570713606 | 2.34282145812906   | 4.23233757888271 | 6.15837181547608 | 0.8530773884124    |             |
| MM034_1     | 3.50405013188996  | 1.00673751307496   | 6.80596387531931 | 3.15929590797295 | 1.60223423913603   | 5.26708804980468 | 5.11752500398122 | 1.14736187217406   |             |
| MM037       | 4.10009785896355  | -0.235174174926203 | 6.52319228544146 | 3.47254749707991 | 1.36102368481246   | 3.74174596836736 | 4.58333142573542 | 2.45121494317638   |             |
| MM041       | 4.49975756022014  | 0.674478201455994  | 5.83110568184746 | 3.32731922226125 | 1.73828209969825   | 5.65487804900734 | 4.1698965559376  | 3.32973476378023   |             |
| MM042       | 4.86842756931005  | 2.44065194283866   | 8.98208955384405 | 3.33808809206449 | 1.3178662199673    | 5.78650915436198 | 4.85223901357889 | 2.2806852214406    |             |
| MM043_1     | 5.18431406229588  | 1.25478979223703   | 6.19291113251409 | 2.84282696764433 | 3.37223218041991   | 3.81508473720977 | 4.19381354452302 | 2.24905831415498   |             |
| MM043_2     | 5.34981787024772  | 2.18998713132832   | 7.82965879116016 | 3.80720182990247 | 4.22282391932334   | 6.38217292084857 | 5.27153220746017 | 2.65346902925762   |             |
| MM044       | 5.52152369924561  | 2.23968008306141   | 7.81561674640786 | 3.11101743647453 | 2.94520148861446   | 4.25344781039844 | 4.87037562323093 | 1.54314429253415   |             |
| MM045       | 3.88917725001427  | 0.803843550404743  | 6.47969183958792 | 3.34837215006605 | 1.65912837778396   | 5.74366808364034 | 4.91222700816645 | 1.64948371835413   |             |
| MM046_1     | 4.93125880507255  | 2.28421677519589   | 6.73506699679149 | 3.39307617483187 | 2.37942627372594   | 5.80637912488745 | 5.02391468845326 | 2.41393817711773   |             |
| MM046_2     | 4.48239554011927  | 2.43425354942948   | 6.70878914506313 | 3.18343637478904 | 2.57595500026036   | 5.88730616461326 | 5.20034339031354 | 2.37222066229763   |             |
| MM048_2     | 3.97676124020311  | -1.69334034108589  | 6.51418456530397 | 3.11277719354831 | 1.33762370093137   | 5.5329893144962  | 3.62891565519946 | 1.4788063098265    |             |
| MM050       | 4.39000202614197  | -0.177699173575922 | 5.72162242648607 | 3.55092997001289 | 1.89286071590111   | 7.21070898989935 | 4.82483470564306 | 0.415518354214209  |             |
| MM051_2     | 4.30962330145369  | 0.470844480186994  | 7.09866795026496 | 3.65136070756451 | 2.36609940338906   | 6.33004343627277 | 5.18392971340088 | 0.807558927579362  |             |
| MM054       | 3.43339643022819  | 2.20357965464411   | 7.27818222455699 | 3.03645360569084 | -0.796978677615867 | 5.78143701434531 | 4.76023236596525 | 1.5252992919452    |             |
| MM056_2     | 3.47046605857499  | 0.181114607971161  | 7.63379315919949 | 4.11078633914343 | -0.172450247162368 | 5.4730844305375  | 5.03178545944195 | 2.81913867975618   |             |
| MM057_4     | 4.84758709794288  | 1.7924273987591    | 7.02263327752277 | 2.58228990758474 | 3.01437322967704   | 5.70925273909927 | 4.85020677317248 | 3.17253669461504   |             |
| MM057_5     | 4.60334441150489  | 0.248197538892936  | 6.82421487630913 | 2.04940704105395 | 2.52763356091225   | 5.22099498398657 | 5.1536217229112  | 2.61314210275852   |             |
| MM057_6     | 5.02409472679819  | 0.324833526117456  | 6.7387634419905  | 2.54723229997027 | 2.34933418228337   | 5.1711982017033  | 5.28515524506702 | 3.63764230575181   |             |
| MM057_1     | 4.41938801974298  | 2.29441151100395   | 6.7734341460005  | 2.58377975207915 | 2.51964911493808   | 5.91867877915564 | 4.47376079466723 | 3.25750412440194   |             |
| MM057_2     | 4.45710002696083  | 1.83416152470717   | 7.5105408969275  | 2.87409762386159 | 2.05589560220717   | 6.80866047943397 | 5.6001159060631  | 1.73453283329223   |             |
| MM057_3     | 3.87653379655725  | 0.752478053630457  | 6.47105249611531 | 1.7436042511847  | 1.69490807079283   | 5.75760595445824 | 5.02351019064968 | 3.35145223830369   |             |
| MM058_1     | 5.9148209987423   | -0.483570556713588 | 6.83555813643244 | 2.00149021678571 | 2.39172396625169   | 5.9273273837455  | 6.40232232820264 | 2.62431401343939   |             |
| MM059       | 4.61847233705841  | -0.552394824981332 | 6.50200263699635 | 3.30676390714724 | 1.10601429388935   | 5.17190728138379 | 4.63803079016041 | 0.526185492736325  |             |
| MM060       | 4.54028229430157  | -0.181410299575036 | 7.44662812298055 | 2.87688067779562 | 2.47097284377897   | 5.74366963118419 | 4.87170993565392 | 1.94845181739903   |             |
| MM061_1     | 3.36744310816711  | 0.328673923467453  | 6.83883994328962 | 1.96821621609155 | 2.0771434048114    | 4.83134188545801 | 4.68748414752695 | 1.58570059509097   |             |
| MM068_1     | 3.54068425620886  | 1.79429036395024   | 6.28920127134728 | 3.05244110401149 | 3.03593888924034   | 4.0608154734796  | 4.58531571831376 | 1.35152311737846   |             |
| MM068_2     | 3.86263238610444  | 0.091209894724295  | 5.6690006512948  | 2.88582595556012 | 3.27871398442523   | 3.28166322840574 | 4.67084038147046 | 1.74839604095021   |             |
| MM091       | 4.4229150512461   | -1.0104111748922   | 6.42559707080499 | 2.87636009969393 | 2.19054240879343   | 5.89154742134852 | 5.09529911201267 | 1.62547768958181   |             |
| MM095       | 4.39832412788826  | 0.827588167947557  | 6.2438845992239  | 2.93041405973222 | 1.24364360415019   | 4.48760757814574 | 4.53697515407408 | 2.15554391039015   |             |
| MM002_1     | 2.19786099263147  | -0.510709371358384 | 5.52448209047537 | 1.52429521113013 | -0.285236348717059 | 3.63681681320851 | 4.19144680655496 | 0.012899636219775  |             |
| MM002_2     | 3.04895516697352  | 0.062914958266112  | 5.79166242993951 | 1.58266240023087 | 0.571888793644336  | 4.49747933643685 | 4.2724177180218  | 0.252980744755144  |             |
| MM002_3     | 2.72276811394357  | -0.705245099900101 | 5.61634804834394 | 1.7391027730721  | -0.798871128521137 | 4.36479673290479 | 4.42180922450845 | -0.123798076649332 |             |
| MM003       | 5.42878484641981  | 0.533279748148647  | 9.67928149843731 | 4.04835204862723 | 2.71898691661062   | 6.43433846710253 | 5.00588535048657 | 2.95289015698566   |             |
| MM005       | 4.56677484547648  | -0.451412303349517 | 8.12492069170455 | 2.61100088693998 | 2.95935358521185   | 6.26614592603911 | 5.59185160019719 | 2.81935142989636   |             |
| MM007       | 4.856930924241    | -0.17544574644098  | 6.92306971032813 | 3.65030321925718 | 2.48599454498771   | 5.33824207041738 | 4.8067766179319  | 2.1172193160763    |             |
| MM010       | 4.15674695372054  | 1.13268788407331   | 6.67703086152533 | 2.36301370422809 | 2.53425854211225   | 6.13048358495769 | 5.31807475465345 | 3.2716866593025    |             |
| MM011       | 4.84603636208376  | 0.971450408400692  | 7.78505060245317 | 3.70014799074511 | 3.34686563171209   | 6.32896811942452 | 5.20731021279771 | 2.94513948500665   |             |

Supplementary Table S5. log<sub>2</sub>(RPKM) expression values for 39 aminopeptidases genes and 17 housekeeping genes in MM patient samples in the FIMM dataset (n = 122) (18/21)

| Gene symbol | <i>CLIC</i>      | <i>G6PD</i>        | <i>GAPDH</i>     | <i>GUSB</i>      | <i>HPRT1</i>       | <i>LDHA</i>      | <i>PGK1</i>      | <i>POLR1B</i>     | Gene symbol |
|-------------|------------------|--------------------|------------------|------------------|--------------------|------------------|------------------|-------------------|-------------|
| Sample_ID   | ENSG00000141367  | ENSG00000160211    | ENSG00000111640  | ENSG00000169919  | ENSG00000165704    | ENSG00000134333  | ENSG00000102144  | ENSG00000125630   | ENSEMBL ID  |
| MM014_4     | 6.00826923092059 | 2.1888156086748    | 8.76003540628596 | 3.82988854876644 | 2.16258518880896   | 6.74265920055548 | 5.42914943483858 | 2.27161971498468  |             |
| MM014_2     | 4.79716519683748 | -0.325417493504677 | 6.22167776349451 | 3.53932332835281 | 0.954660573664792  | 3.87873918751167 | 4.31087338244672 | 1.87636143806693  |             |
| MM017_1     | 4.24785340630977 | -0.758534174628053 | 7.51670164995187 | 2.66176905506923 | 1.25848651641703   | 5.71432722649911 | 5.20124670026933 | 2.72876774022813  |             |
| MM017_2     | 4.13479091010972 | -0.173380444515377 | 7.1158876195619  | 4.0813235797736  | 1.96096298897556   | 5.23285222708828 | 4.45601371317828 | 2.3168741199317   |             |
| MM017_3     | 5.39149177167302 | 0.705545390455784  | 8.45011289662893 | 5.23013733747335 | 3.46847804726936   | 6.40952399785066 | 5.31108369954671 | 3.07066468216105  |             |
| MM018       | 3.98720932273856 | 0.545100708953911  | 6.3552610525513  | 2.07245426971855 | 1.29026411528701   | 5.09779093555044 | 4.23862631905614 | 1.60800914722652  |             |
| MM019       | 3.17624760662359 | -0.431501031953581 | 6.31833741928458 | 2.70104821299531 | 1.13312467323947   | 5.11758191705672 | 4.47294423202799 | 2.15653443932377  |             |
| MM020       | 5.15982061717246 | 0.548097314127702  | 6.47289026495377 | 2.31630462542108 | 2.29024470452345   | 5.94692837414735 | 4.84978081146901 | 4.03822515289655  |             |
| MM022_1     | 4.82893416518426 | 2.37374568139121   | 7.40001435769109 | 3.23423916196581 | -0.11422274233926  | 3.71699233179522 | 5.35750052758792 | 2.25237382241438  |             |
| MM022_3     | 4.15280219838149 | -0.14965105406922  | 5.93882341038703 | 2.88164759177908 | 1.5236295446001    | 3.45996044879843 | 5.21254488212545 | 1.03388988766834  |             |
| MM024       | 4.04049194495047 | 1.56091197193452   | 5.68496886395581 | 1.86634627490998 | 2.95783099185415   | 5.45199800897016 | 4.58078647705321 | 2.50918016180558  |             |
| MM025_1     | 4.10072720112481 | 0.44545962398214   | 5.73424404522884 | 1.87330020219242 | 1.1311595971893    | 4.22145027593591 | 4.54032770909752 | 2.4405423030292   |             |
| MM036_1     | 5.8708707309175  | -0.105637263682061 | 6.13004937932942 | 2.70253950853728 | -0.402153567783076 | 4.72044662524349 | 4.61958893653227 | 1.95816621448787  |             |
| MM036_2     | 6.02572091113445 | -0.753342943977757 | 6.17985873394732 | 2.56556740144756 | 0.483489368459803  | 5.17345701170933 | 4.75845295295811 | 0.952575181955741 |             |
| MM038       | 4.75796449034511 | 0.112965270047463  | 6.61188672548743 | 3.79239994582023 | 1.45710780727685   | 5.23006397929067 | 4.81013084142086 | 1.92367188077099  |             |
| MM039       | 3.76469611775135 | 1.25569771664015   | 6.24208598971567 | 2.99839545205524 | 2.50089362349449   | 5.87039324587782 | 4.88707288944669 | 1.3093066757374   |             |
| MM049       | 3.75816415150071 | -0.305074071884597 | 5.57233744452128 | 2.63731515864301 | 0.962730197823257  | 4.61211856885008 | 3.68337866917076 | 1.67058704420495  |             |
| MM071       | 3.83734487907973 | 0.299099612179195  | 6.41071347166147 | 3.46166190128595 | 2.33857515405198   | 5.70935293003479 | 4.18050580426071 | 1.79914710732081  |             |
| MM080       | 3.98376094907497 | 0.872704484804242  | 6.6951239543591  | 3.02402365731639 | 2.02720584548152   | 5.18823725375046 | 4.49637242031059 | 2.30412780895688  |             |
| MM081       | 4.80065423895581 | 0.743827369668343  | 7.54640816738637 | 3.28634670345557 | 2.16495424232542   | 4.87354820482125 | 4.24857114457305 | 1.62572805481422  |             |
| MM082       | 2.75704527711992 | -0.839833365306427 | 6.2244599856311  | 3.0178247755269  | 0.758028303979711  | 4.58432187249377 | 4.32454438041371 | 1.65756489696824  |             |
| MM098       | 4.97351229367519 | 1.83116174564717   | 7.68860857374726 | 3.29913987809625 | 1.84441378219295   | 4.71744899977853 | 5.32184770268752 | 1.37613854428427  |             |
| MM102       | 4.45336957266564 | 2.7412126947685    | 7.57098254155881 | 2.54493795279726 | 2.6093263401882    | 4.59853218242486 | 5.83718889898884 | 0.887881532162242 |             |
| MM109       | 3.96348402240903 | 0.055955208745002  | 8.68686178403211 | 2.73102157326981 | 2.28991977659479   | 5.75166981851331 | 4.86984819398511 | 1.22086874304012  |             |
| MM111_1     | 5.16667784650448 | -1.93856115586615  | 7.68516905389482 | 3.06821123526461 | 1.81891889108844   | 5.48403313994573 | 5.80033453903838 | 1.9085894295498   |             |
| MM111_2     | 5.79289212642987 | 0.028367919957738  | 7.5928957548091  | 3.12353307958839 | 3.3067272186233    | 6.02630889603765 | 5.492328809476   | 2.97721551428408  |             |
| MM113_2     | 4.75843305358724 | 1.54750970917293   | 7.28880790474057 | 3.24871477342527 | 3.26581509414918   | 5.09296625834442 | 4.58194510211537 | 1.89839763120288  |             |
| MM117_2     | 4.53584055494412 | 0.098367473091851  | 7.64152717336743 | 3.22322639134351 | 1.56065005585612   | 5.06751748488328 | 5.39585132289528 | 2.66690823674988  |             |
| MM124       | 4.2688071959145  | -0.801342783947263 | 6.33407007097977 | 2.72567056890114 | 1.04699805141413   | 3.90587841888988 | 4.6266077672567  | 2.28836523263713  |             |
| MM129       | 5.10911908989663 | 1.3654532750757    | 8.4064316395097  | 3.77559887933476 | 3.44029118895461   | 6.15930723374584 | 5.37511183875796 | 2.54357368285167  |             |
| MM135       | 4.32960824750849 | 1.50752315706818   | 6.20634597642055 | 3.95665112783223 | 2.87496892923515   | 5.81839392466397 | 4.97423101289258 | 3.17722087264084  |             |
| MM137       | 4.42073188622783 | -1.73931000451698  | 6.6012891985506  | 2.67042643303305 | 0.631398801593659  | 5.58440698216303 | 4.88176371019525 | 0.536099517287961 |             |
| MM006       | 4.11830454081655 | 0.693958069983074  | 6.45302804444186 | 3.07205343128222 | 1.66551287742959   | 6.01022238339648 | 5.31136490677694 | 1.57629984946867  |             |
| MM008       | 4.31716110925626 | 0.755991957836452  | 6.58060831925686 | 2.74769089079549 | 1.86788774545325   | 4.88146434473269 | 4.90693658241904 | 2.14315943638363  |             |

Supplementary Table S5. log<sub>2</sub>(RPKM) expression values for 39 aminopeptidases genes and 17 housekeeping genes in MM patient samples in the FIMM dataset (n = 122) (19/21)

| Gene symbol    | Housekeeping genes |                   |                  |                  |                   |                  | Gene symbol |
|----------------|--------------------|-------------------|------------------|------------------|-------------------|------------------|-------------|
|                | <i>POLR2A</i>      | <i>RPL19</i>      | <i>RPLP0</i>     | <i>SDHA</i>      | <i>TBP</i>        | <i>TUBB</i>      |             |
| Sample_ID      | ENSG00000181222    | ENSG00000108298   | ENSG00000089157  | ENSG00000073578  | ENSG00000112592   | ENSG00000196230  | ENSEMBL ID  |
| <b>MM032_1</b> | 1.90900095607337   | 8.01912086028781  | 7.58666575874774 | 3.04989107158624 | 1.2607172557548   | 4.37900061296906 |             |
| <b>MM051_1</b> | 3.8492461964355    | 6.8187328697066   | 6.95174539221958 | 3.49921588000285 | 2.25927513975302  | 4.43077328893564 |             |
| <b>MM053</b>   | 2.64959465127335   | 6.610388664314342 | 7.72032844852403 | 3.53427901111252 | 0.47664165055086  | 4.49809305078788 |             |
| <b>MM056_1</b> | 2.17302085159129   | 10.0200148397369  | 9.61484195313039 | 2.98000501098375 | 2.35189298579644  | 5.08271856362828 |             |
| <b>MM063</b>   | 1.35406869313452   | 8.43570309810838  | 8.30320795724813 | 2.9962679009942  | 2.09076742339479  | 4.08866299330981 |             |
| <b>MM064</b>   | 2.90167069150736   | 8.39701419898563  | 7.47119345899687 | 4.45923322437565 | 1.13639468313514  | 6.03700050254277 |             |
| <b>MM065</b>   | 3.06702435627096   | 7.84475467508515  | 7.6709551918984  | 2.2750934734355  | 1.78728188209462  | 5.37948919925405 |             |
| <b>MM066</b>   | 3.01230916561483   | 8.78683168653478  | 8.25798096061955 | 3.25357722425857 | 2.43429872323257  | 4.56298593796764 |             |
| <b>MM067</b>   | 1.74270407742102   | 9.40083460872123  | 8.60730504221437 | 3.15910345405228 | 1.46535353974454  | 4.39172257465135 |             |
| <b>MM070</b>   | 1.61639320319801   | 9.20446743130581  | 7.89270821832674 | 3.62509216252702 | 1.51475504390312  | 4.74502946057672 |             |
| <b>MM074</b>   | 2.40225361505146   | 7.70075927187522  | 6.49019919485002 | 2.76573719617256 | 1.81598006295875  | 5.27002017442633 |             |
| <b>MM075</b>   | 1.27886185677649   | 8.94034235380439  | 8.53882130235999 | 3.52336653667091 | 0.524395016399111 | 5.42840908127286 |             |
| <b>MM078_1</b> | 1.18658464062673   | 8.10894477402634  | 8.04801514896737 | 2.32152940992321 | 0.903306771279101 | 5.66895244600696 |             |
| <b>MM085</b>   | 0.911957167979301  | 8.19431915637134  | 7.77946735681916 | 2.87035539305314 | 0.744829381017355 | 4.41230397535469 |             |
| <b>MM086</b>   | 2.45186417289643   | 8.86261533781989  | 7.321862590333   | 3.49372763247629 | 1.16301756599366  | 5.33783021238866 |             |
| <b>MM087</b>   | 0.862618261112554  | 9.1617489670797   | 8.90499964490951 | 3.66067706291003 | 2.01249186355465  | 6.52234729027794 |             |
| <b>MM088</b>   | 1.26485787218388   | 9.14404997712199  | 7.70110197651151 | 1.59062867695349 | 0.504444692980416 | 4.98576849765965 |             |
| <b>MM089</b>   | 2.50411617836488   | 7.6627935804627   | 6.93502045995375 | 2.66639094061892 | 2.30699390281981  | 4.32507105382165 |             |
| <b>MM090</b>   | 1.72975247306378   | 8.93288358716817  | 8.22632622780014 | 3.91931188209067 | 2.76495986908792  | 6.15897538977217 |             |
| <b>MM093</b>   | 2.08665737453788   | 7.98271282883804  | 7.87596477018174 | 4.07908144641917 | 2.05168345858433  | 4.47528656242697 |             |
| <b>MM094</b>   | 3.59367442849111   | 8.95723433620636  | 8.21085567484776 | 3.74161520930371 | 2.36677292957016  | 5.75900772636311 |             |
| <b>MM096</b>   | 2.27524144382496   | 9.06716358347345  | 8.53235775533834 | 3.00469270632032 | 2.48322164939049  | 6.1900280807698  |             |
| <b>MM101</b>   | 2.97669100374644   | 8.50253937927236  | 8.52024394008776 | 3.04239441738945 | 0.910079377068534 | 4.75061202978275 |             |
| <b>MM114</b>   | 2.41596400807935   | 7.72827034241688  | 7.21845753295249 | 2.94302346128991 | 1.85100225803676  | 3.89139299563257 |             |
| <b>MM115</b>   | 2.57650826278182   | 8.64027564669896  | 8.06258867624572 | 4.43790743954632 | 2.40806435001025  | 5.78142447822787 |             |
| <b>MM117_1</b> | 0.765317239091839  | 8.19858965086398  | 8.26188621852713 | 2.87230994272504 | 1.06959592230219  | 3.55474562023211 |             |
| <b>MM118</b>   | 3.53518975716016   | 7.85763626235658  | 7.41249226449369 | 2.97384482347379 | 1.58250639161435  | 4.50323472762452 |             |
| <b>MM119</b>   | 2.15687848418234   | 8.39808710228579  | 8.391645122471   | 3.32625965944125 | 2.23070184656244  | 5.23618587868095 |             |
| <b>MM121</b>   | 3.28869977424752   | 8.804448152499    | 7.36841381952831 | 2.8776216324057  | 2.02639620156748  | 4.19752234018723 |             |
| <b>MM122</b>   | 2.44354308331539   | 8.87465096963633  | 7.61965497506705 | 3.25998001588879 | 1.23129650123017  | 5.08316456687439 |             |
| <b>MM123</b>   | 4.20389063064923   | 8.63358016991036  | 7.53203892200444 | 3.40370579906592 | 2.14255569824279  | 4.05708684441954 |             |
| <b>MM126</b>   | 2.84607778910956   | 8.45585571009918  | 7.305233201893   | 3.30325473041938 | 1.39920747550702  | 4.142986408249   |             |
| <b>MM128_1</b> | 0.293883753918095  | 8.54052928321     | 7.82448691459803 | 3.47544292410579 | 1.56087867969614  | 4.88382860072052 |             |
| <b>MM131</b>   | 2.14325591869904   | 9.15406464610409  | 8.14756104265748 | 3.83423542053561 | 1.62078870927638  | 5.02435108109859 |             |
| <b>MM132</b>   | 1.71400638060732   | 7.610349655217    | 6.90681468114767 | 2.12186587488227 | 0.284263336531058 | 3.36472129643904 |             |
| <b>MM133</b>   | 2.26424464337037   | 8.84155461155343  | 7.9948347038595  | 2.25402195126976 | 1.26832524071968  | 2.73972644765208 |             |
| <b>MM134</b>   | 2.01646271386077   | 9.04440675389781  | 8.80362975084708 | 3.34035533199886 | 0.792390803602216 | 4.97539763095894 |             |
| <b>MM136</b>   | 2.30327951984937   | 8.45597150430181  | 8.0658716009155  | 3.73121295359784 | 2.32249881559789  | 4.28292744131157 |             |
| <b>MM138</b>   | 1.48195898562344   | 8.18868310701751  | 7.72691112611972 | 3.56471850648547 | 1.96710809318136  | 4.28012886934491 |             |
| <b>MM139</b>   | 1.13578368308192   | 9.33945955048045  | 7.63520624218025 | 2.86622397909166 | 1.83425379832375  | 3.82160634199378 |             |
| <b>MM140</b>   | 2.57439195797568   | 8.36230633829054  | 7.08197903072186 | 3.05255629493078 | 1.71042108578746  | 4.26766785198908 |             |
| <b>MM026</b>   | 2.281105459904     | 9.8603922075498   | 8.45707037892302 | 3.48635351327249 | 1.07534657805753  | 4.36510071735535 |             |
| <b>MM027</b>   | 3.59036673884597   | 8.68883623245867  | 7.6530868736335  | 3.23396558629432 | 2.2003974860987   | 6.22056589091348 |             |
| <b>MM028</b>   | 2.03479232464126   | 8.08616056435995  | 7.00133972989625 | 3.21866804855371 | 1.86234235911885  | 5.81597308666497 |             |

Supplementary Table S5. log2(RPKM) expression values for 39 aminopeptidases genes and 17 housekeeping genes in MM patient samples in the FIMM dataset (n = 122) (20/21)

| Gene symbol | <i>POLR2A</i>     | <i>RPL19</i>     | <i>RPLP0</i>     | <i>SDHA</i>      | <i>TBP</i>         | <i>TUBB</i>      | Gene symbol |
|-------------|-------------------|------------------|------------------|------------------|--------------------|------------------|-------------|
| Sample_ID   | ENSG00000181222   | ENSG00000108298  | ENSG00000089157  | ENSG00000073578  | ENSG00000112592    | ENSG00000196230  | ENSEMBL ID  |
| MM030_1     | 3.78989802417277  | 9.25316540271148 | 8.51939886241036 | 2.66279840640868 | 2.51478632768757   | 6.45596039986878 |             |
| MM030_2     | 2.52363975764723  | 9.88639947239267 | 8.90993564074822 | 2.02924942010269 | 1.27105505937392   | 5.16094813936295 |             |
| MM031_2     | 0.771882230772295 | 9.53434532726665 | 8.48012039275091 | 2.91701620313056 | 0.853707192321073  | 3.41158673233167 |             |
| MM033_4     | 2.75018915098208  | 8.46617716908429 | 8.36838454771905 | 2.83068408123495 | 1.32088799058264   | 5.65549253524473 |             |
| MM033_1     | 3.85749162792095  | 8.03926611192682 | 9.33136533818616 | 2.87639201391992 | 1.0322969085176    | 5.37859165382442 |             |
| MM033_2     | 1.29589141263246  | 8.81579676570343 | 8.6846987866685  | 2.56920125062199 | 0.545263397364794  | 5.41728425931318 |             |
| MM034_2     | 1.71955988087472  | 8.99718535030914 | 7.72498243868674 | 2.86892956807981 | 1.17843507174135   | 3.87482645011503 |             |
| MM034_1     | 1.12366329444694  | 9.25385616560794 | 8.24821127145071 | 3.86579345308786 | 1.37877226167116   | 5.48936086325012 |             |
| MM037       | 0.398109283186805 | 10.0671801687197 | 8.68811770210036 | 2.47962240801044 | 0.483446064670239  | 4.16730723033172 |             |
| MM041       | 2.74838226882433  | 9.10188537608574 | 9.1648829679177  | 3.66403400368067 | 1.74910456684699   | 4.97703670795239 |             |
| MM042       | 1.8996633587772   | 7.48520113307901 | 8.58638473626463 | 3.277124620513   | 1.21402047305445   | 7.23842785262611 |             |
| MM043_1     | 3.4500562709878   | 8.34152271227439 | 7.25594672551852 | 3.0668726998011  | 3.07846926149181   | 4.24993914019989 |             |
| MM043_2     | 3.4906456275464   | 8.45824541616592 | 7.85358333794136 | 3.49100626751206 | 2.95023560234718   | 6.36051395951662 |             |
| MM044       | 2.90429011796739  | 6.2033105318251  | 7.99738600014179 | 3.76182617676891 | 1.85943532771668   | 8.16797643051646 |             |
| MM045       | 3.20971287568049  | 8.99491773516592 | 7.63344666883004 | 3.50196400740896 | 2.56698259408759   | 5.56999877365899 |             |
| MM046_1     | 2.89737210938512  | 8.78746741145171 | 8.48679722629077 | 4.64357315784998 | 2.39473295911621   | 6.00770521411512 |             |
| MM046_2     | 3.23440698255475  | 8.7884247214019  | 8.190124566159   | 4.28344448260221 | 2.59733023623752   | 5.76365613988767 |             |
| MM048_2     | 2.42791945686625  | 9.3063603251597  | 9.06560534959236 | 3.63958381506686 | 0.87904772820763   | 4.00871799976141 |             |
| MM050       | 2.18757922652317  | 7.9247311401757  | 7.94565031888153 | 3.8158508353517  | 1.57005529233217   | 6.27382649326569 |             |
| MM051_2     | 2.97738867351261  | 7.90007703937695 | 7.26739914229014 | 4.1728743067525  | 2.72604212682923   | 5.48661132877307 |             |
| MM054       | 1.83902649550303  | 5.28789764315264 | 7.27578148349077 | 2.31466858500632 | -0.541615405939295 | 4.92667431923033 |             |
| MM056_2     | 2.12096271758042  | 9.29989580337225 | 9.22935732769969 | 3.36450848150118 | 2.11046137262099   | 5.77080689830108 |             |
| MM057_4     | 4.47146881361515  | 9.38926435153843 | 8.73922810340221 | 3.67637219945947 | 2.67668640063061   | 6.25391794391583 |             |
| MM057_5     | 2.91810353521838  | 9.84149954336098 | 9.84106465436098 | 3.09713820221519 | 1.67077165221496   | 5.2956420056352  |             |
| MM057_6     | 1.96666897016429  | 10.2770628459855 | 9.81573420406992 | 3.04015926549641 | 1.30686811021665   | 5.15895418243518 |             |
| MM057_1     | 4.42492185893251  | 9.17073223529784 | 8.21143070946375 | 3.95372265242291 | 2.84312234645619   | 6.87359043120057 |             |
| MM057_2     | 2.82795791094961  | 8.67103634945808 | 8.06463446889957 | 2.82628362756272 | 2.45708695047206   | 6.04001353037873 |             |
| MM057_3     | 1.92629007794272  | 9.85305802475474 | 8.90416556769228 | 3.20354187983774 | 2.02544300354923   | 6.13525742512806 |             |
| MM058_1     | 1.68613844920371  | 7.96400937093645 | 7.10785721716567 | 4.05714368040736 | 2.24356932283187   | 6.30291247867981 |             |
| MM059       | 1.69681999297292  | 8.07409022754385 | 7.81634493638926 | 3.99311263314629 | 1.93154474779263   | 4.7832702621166  |             |
| MM060       | 2.30739963829892  | 8.89686599295441 | 8.72406103835558 | 3.47392724946862 | 0.864943968547557  | 5.15450112033208 |             |
| MM061_1     | 1.12389960389187  | 8.49494603589276 | 9.04506704080369 | 3.00237280277353 | 1.5276773922708    | 4.25962143227548 |             |
| MM068_1     | 1.74878464255679  | 7.07226635263154 | 6.63118452411406 | 2.54924171224221 | 1.77426842987175   | 5.20451832579478 |             |
| MM068_2     | 0.665257118104722 | 7.43862171875579 | 6.70291804135841 | 3.17435220122085 | 1.33473974570773   | 5.29034924595933 |             |
| MM091       | 3.64612227221585  | 9.17791451872469 | 9.00065710436566 | 3.93136923112079 | 1.06043772971648   | 5.56898572698073 |             |
| MM095       | 3.23880943399936  | 8.19849193052078 | 6.21749147476846 | 3.68551366261973 | 2.80302834293212   | 5.14509502486602 |             |
| MM002_1     | 0.593212113030711 | 8.77262045639181 | 8.0452912011943  | 3.14861679910989 | -0.179147585087165 | 3.42730639775233 |             |
| MM002_2     | 1.90315915723045  | 8.74888255745188 | 7.94938374478304 | 3.00436545302191 | -0.489300541047538 | 3.29442971837495 |             |
| MM002_3     | 1.1659912840194   | 9.3310308837056  | 8.13121601997696 | 2.94978779567097 | -0.241145195052721 | 2.61752016155635 |             |
| MM003       | 4.08202899251779  | 10.0387869493598 | 9.73605327274442 | 4.11988964798484 | 2.46434716280712   | 6.04351598449035 |             |
| MM005       | 1.38405236218555  | 9.56210781606065 | 9.12961159384536 | 3.59837287542544 | 1.16669601028516   | 6.60095418450896 |             |
| MM007       | 2.29744625414326  | 8.25272929720772 | 7.60554239080334 | 3.99503263759939 | 1.75454810493725   | 6.24744692669507 |             |
| MM010       | 0.875542147361046 | 8.92924452370081 | 8.63530535343771 | 3.6545506902012  | 1.23561015005268   | 6.84262665382766 |             |
| MM011       | 4.11207587007349  | 9.00943796153334 | 8.14348989243081 | 3.72689514225823 | 1.87542262946654   | 7.34328564144541 |             |

Supplementary Table S5. log2(RPKM) expression values for 39 aminopeptidases genes and 17 housekeeping genes in MM patient samples in the FIMM dataset (n = 122) (21/21)

| Gene symbol      | <i>POLR2A</i>      | <i>RPL19</i>     | <i>RPLP0</i>     | <i>SDHA</i>      | <i>TBP</i>        | <i>TUBB</i>      | Gene symbol |
|------------------|--------------------|------------------|------------------|------------------|-------------------|------------------|-------------|
| <b>Sample_ID</b> | ENSG00000181222    | ENSG00000108298  | ENSG00000089157  | ENSG00000073578  | ENSG00000112592   | ENSG00000196230  | ENSEMBL ID  |
| <b>MM014_4</b>   | 2.15104210977924   | 8.90254820463119 | 8.23911514726065 | 2.94260822590478 | 2.35348845542621  | 6.26165355742324 |             |
| <b>MM014_2</b>   | 1.18141324626899   | 8.08653652236156 | 7.72808808299038 | 3.14059585633639 | 2.18196342154913  | 5.09801834306724 |             |
| <b>MM017_1</b>   | 0.806755037193914  | 9.19952751172893 | 8.86872893533964 | 3.76178669211146 | 1.57570385746867  | 5.43366108560881 |             |
| <b>MM017_2</b>   | 1.67371397522009   | 8.92727350580001 | 8.4456364333575  | 4.12616837198891 | 2.66835013094186  | 5.66304669639417 |             |
| <b>MM017_3</b>   | 1.41488840149847   | 9.29022485947528 | 9.31502795845421 | 3.14170447043176 | 2.08035993739726  | 7.56938176578953 |             |
| <b>MM018</b>     | 3.96888427648939   | 7.40342396784616 | 6.26335114562256 | 2.7854215929855  | 1.96158945914004  | 3.42592981836512 |             |
| <b>MM019</b>     | 1.35868771202538   | 9.26348968657011 | 10.244311717331  | 2.39419368167186 | 1.22345488274965  | 4.07572529461706 |             |
| <b>MM020</b>     | 2.7958064764161    | 7.790926590116   | 7.79603164586767 | 3.96455733257601 | 2.44021201682458  | 5.5996220627444  |             |
| <b>MM022_1</b>   | 3.8111286125794    | 5.48662915564099 | 6.87498710843293 | 3.73379965994635 | 2.7220666058582   | 6.45645794758514 |             |
| <b>MM022_3</b>   | 2.29513430137963   | 7.55598370987185 | 7.02103832298757 | 2.97844927591342 | 2.60765802345506  | 3.95168362625985 |             |
| <b>MM024</b>     | 3.00655752446156   | 8.7975246237062  | 8.52632734402746 | 3.43929413189392 | 2.15937077334445  | 6.11547705554057 |             |
| <b>MM025_1</b>   | 1.60081186608789   | 8.08882436231893 | 7.38406580402508 | 3.39351876564318 | 1.38798820165695  | 4.91716270638039 |             |
| <b>MM036_1</b>   | 0.04643375099583   | 8.76052842275904 | 8.77326011824809 | 3.23243394250655 | 0.145605060108743 | 5.29394843723068 |             |
| <b>MM036_2</b>   | 1.29122056162696   | 8.55784262625174 | 8.62098561251734 | 3.02794256358101 | 1.18762614054691  | 5.17592841712559 |             |
| <b>MM038</b>     | 0.09987713355929   | 9.2261095675272  | 8.31878918787866 | 4.09433563273378 | 1.24975637835224  | 5.13165457222962 |             |
| <b>MM039</b>     | 2.26049291237907   | 9.01630848653198 | 9.051481155666   | 3.31474488851785 | 1.90099949642743  | 5.52253043757956 |             |
| <b>MM049</b>     | 2.68073403273831   | 8.47967407890119 | 7.74292105416314 | 3.82223930933384 | 1.67522113032486  | 4.11216707393963 |             |
| <b>MM071</b>     | 2.1470443015965    | 8.83081582966656 | 8.83467482527321 | 3.24052944694955 | 2.18432073091475  | 4.7684374376153  |             |
| <b>MM080</b>     | 2.74132595524378   | 9.05530414679534 | 8.16409925181928 | 3.23648503709234 | 1.46478403588031  | 5.40988180200625 |             |
| <b>MM081</b>     | 3.98041692249645   | 7.93458219423869 | 7.76251516488052 | 3.75848824844051 | 1.51421695712743  | 4.90235099716045 |             |
| <b>MM082</b>     | -0.130807504484237 | 9.50156323439052 | 8.67473876096513 | 3.68281533543818 | 0.248603109049927 | 4.20982558931692 |             |
| <b>MM098</b>     | 2.57270452782263   | 8.48017261342904 | 8.23289126921394 | 3.74666409475821 | 2.33651660847731  | 4.48276897613452 |             |
| <b>MM102</b>     | 1.22104789580576   | 7.78789338357756 | 6.87297227718333 | 3.08512119579868 | 1.10375572409374  | 4.91411148512464 |             |
| <b>MM109</b>     | 2.86960474572783   | 8.64391897687295 | 8.61510892127015 | 3.50498575055372 | 1.52714978654303  | 4.17095834627592 |             |
| <b>MM111_1</b>   | 2.24248847486738   | 9.07925141162133 | 9.4301394654079  | 4.0298251631705  | 2.04411263618259  | 5.19385470762953 |             |
| <b>MM111_2</b>   | 3.17685612863811   | 8.30827060668739 | 8.17750504324074 | 3.71045838278564 | 2.41658027806459  | 5.3472709736665  |             |
| <b>MM113_2</b>   | 2.67041650656575   | 9.69772942950021 | 8.40270665284482 | 3.85442092539694 | 2.3286139051096   | 7.34119534902446 |             |
| <b>MM117_2</b>   | 1.17488208542064   | 9.02500585657412 | 8.88119104259046 | 3.96738118335618 | 1.45871965735303  | 5.22775938593236 |             |
| <b>MM124</b>     | 1.42771177831129   | 9.0074994607261  | 9.09634273496478 | 4.22020834926785 | 1.63671487380315  | 4.21410948487979 |             |
| <b>MM129</b>     | 3.60950754401011   | 8.95889066740617 | 8.89846703101617 | 3.30403395576895 | 2.09572848222912  | 5.97724181130943 |             |
| <b>MM135</b>     | 2.00082014692194   | 9.80023969500385 | 9.53235268823632 | 5.71740247425088 | 2.2304239230194   | 4.8024765587515  |             |
| <b>MM137</b>     | 1.02947256582855   | 8.36435946629741 | 8.25659489023437 | 3.65658341533633 | 1.24262625992648  | 3.71241364506295 |             |
| <b>MM006</b>     | 0.023770864615895  | 8.32528047710918 | 7.83550534887312 | 3.17650208539535 | 0.681090325719764 | 4.79518323655455 |             |
| <b>MM008</b>     | 3.57101083816457   | 8.35650024891247 | 7.31182765440597 | 3.35559335247453 | 2.47991270849313  | 4.4152487870682  |             |

**Supplementary Table S6. LC-MS/MS-based proteomics label free quantitation intensity values for 17 aminopeptidase proteins in CD138+ cells isolated from MM patient samples in the FIMM dataset (n = 23) (1/2)**

| Gene symbol  | ERAP1                                  | BLMH                | DNPEP                   | DPP3                   | ERAP2                                  | LNPEP                          | METAP1                      | METAP2                      | NPEPPS                             | PEPD                | UniProt ID                                |
|--------------|----------------------------------------|---------------------|-------------------------|------------------------|----------------------------------------|--------------------------------|-----------------------------|-----------------------------|------------------------------------|---------------------|-------------------------------------------|
| Protein name | Endoplasmic reticulum aminopeptidase 1 | Bleomycin hydrolase | Aspartyl aminopeptidase | Dipeptidyl peptidase 3 | Endoplasmic reticulum aminopeptidase 2 | Leucyl-cystinyl aminopeptidase | Methionine aminopeptidase 1 | Methionine aminopeptidase 2 | Puromycin-sensitive aminopeptidase | Xaa-Pro dipeptidase |                                           |
| Sample_ID    | Q9NZ08                                 | Q13867              | Q9ULA0                  | Q9NY33                 | Q6P179                                 | Q9UIQ6                         | P53582                      | P50579                      | P55786                             | P12955              |                                           |
| MM046_1      | 24.7113                                | 19.2347             | 21.0844                 | 22.3697                | 20.006                                 | 20.465                         | 20.5704                     | 20.7326                     | 22.8536                            | 22.584              |                                           |
| MM041        | 23.9385                                | 22.1415             | 23.5018                 | 23.8521                | 21.1689                                | 21.0604                        | 21.2797                     | 21.363                      | 23.9005                            | 23.4966             |                                           |
| MM064        | 25.3169                                | 22.2104             | 23.5301                 | 23.4929                | 21.9913                                | 18.7163                        | 19.2722                     | 21.2253                     | 24.1857                            | 23.0849             |                                           |
| MM011        | 23.6926                                | 21.9358             | 21.5262                 | 24.3608                | 21.8068                                | 20.8864                        | 20.5233                     | 21.9245                     | 24.8088                            | 22.4492             |                                           |
| MM057_1      | 24.8582                                | 22.7023             | 21.7074                 | 24.3797                | 18.0237                                | 20.5707                        | 20.7946                     | 21.5296                     | 23.493                             | 24.1283             |                                           |
| MM025_1      | 24.3473                                | 22.5243             | 18.3807                 | 25.1295                | 22.4219                                | 20.7795                        | 18.8189                     | 18.6759                     | 24.5621                            | 23.0364             |                                           |
| MM033_2      | 21.9064                                | 22.1319             | 23.3005                 | 23.5231                | 18.9387                                | 18.4204                        | 21.6164                     | 21.3568                     | 24.4556                            | 22.4273             |                                           |
| MM067        | 25.7706                                | 22.266              | 24.0684                 | 23.7447                | 21.3858                                | 19.1941                        | 18.3418                     | 20.8676                     | 24.0517                            | 23.4918             |                                           |
| MM056_2      | 24.374                                 | 22.3194             | 18.8799                 | 21.1254                | 20.4959                                | 18.2471                        | 22.8642                     | 18.9744                     | 23.0628                            | 24.5441             |                                           |
| MM007        | 25.4574                                | 21.4356             | 21.563                  | 23.6091                | 19.0234                                | 20.3902                        | 18.5865                     | 18.3103                     | 24.55                              | 23.3707             |                                           |
| MM078_1      | 25.5609                                | 21.6251             | 22.413                  | 23.9888                | 21.644                                 | 18.0796                        | 18.9309                     | 21.0485                     | 24.0345                            | 21.8537             |                                           |
| MM095        | 24.4312                                | 21.1978             | 23.2931                 | 22.9839                | 22.1795                                | 20.856                         | 18.472                      | 19.4447                     | 24.3027                            | 22.5541             |                                           |
| MM066        | 23.5103                                | 20.807              | 22.5512                 | 23.0215                | 21.1538                                | 20.736                         | 19.1762                     | 21.3696                     | 23.8438                            | 21.5221             |                                           |
| MM043_1      | 23.3683                                | 21.9309             | 22.0692                 | 23.0482                | 21.8045                                | 19.2803                        | 19.1309                     | 19.5286                     | 24.0665                            | 19.3847             |                                           |
| MM020        | 23.9758                                | 21.9205             | 22.1529                 | 23.9101                | 21.4102                                | 18.7155                        | 21.6275                     | 18.6846                     | 24.5302                            | 22.6953             |                                           |
| MM032_1      | 24.2657                                | 19.0407             | 22.5971                 | 23.243                 | 22.1541                                | 19.2696                        | 18.7976                     | 18.5184                     | 24.4647                            | 22.3936             |                                           |
| MM075        | 24.3382                                | 21.8921             | 23.8179                 | 24.0392                | 21.1998                                | 18.819                         | 21.4561                     | 18.7368                     | 24.3674                            | 22.9608             |                                           |
| MM065        | 24.339                                 | 21.6968             | 23.4268                 | 23.7799                | 19.4227                                | 18.2856                        | 20.3726                     | 18.64                       | 24.1898                            | 23.0178             |                                           |
| MM074        | 24.9367                                | 21.1766             | 22.4422                 | 23.3359                | 22.9194                                | 21.071                         | 18.6308                     | 21.7832                     | 24.5299                            | 23.0976             |                                           |
| MM070        | 24.2423                                | 22.3367             | 22.2455                 | 23.3762                | 20.7868                                | 20.5967                        | 18.9516                     | 19.4787                     | 24.6001                            | 22.4085             |                                           |
| MM030_1      | 26.0273                                | 22.6814             | 21.8559                 | 22.9622                | 21.9495                                | 19.2425                        | 19.5261                     | 20.8292                     | 24.5134                            | 22.846              |                                           |
| MM003        | 25.5683                                | 23.3213             | 21.3351                 | 22.6769                | 21.1791                                | 20.379                         | 19.9859                     | 21.6774                     | 24.1771                            | 22.9552             |                                           |
| MM045        | 25.6829                                | 21.5224             | 22.5574                 | 22.6386                | 22.1405                                | 19.0324                        | 19.1486                     | 18.6183                     | 23.5211                            | 21.9902             |                                           |
|              | 36                                     | 10                  | 13                      | 23                     | 14                                     | 6                              | 6                           | 7                           | 32                                 | 19                  | Number of peptides identified by LC-MS/MS |



**Supplementary Table S6. LC-MS/MS-based proteomics label free quantitation intensity values for 17 aminopeptidase proteins in CD138+ cells isolated from MM patient samples in the FIMM dataset (*n* = 23) (2/2)**

| Gene symbol  | TPP1                    | XPNPEP1                  | DPP7                   | LAP3                   | LTA4H                     | RNPEP            | TPP2                    |                                           |
|--------------|-------------------------|--------------------------|------------------------|------------------------|---------------------------|------------------|-------------------------|-------------------------------------------|
| Protein name | Tripeptidyl-peptidase 1 | Xaa-Pro aminopeptidase 1 | Dipeptidyl peptidase 2 | Cytosol aminopeptidase | Leukotriene A-4 hydrolase | Aminopeptidase B | Tripeptidyl-peptidase 2 | UniProt ID                                |
| Sample_ID    | O14773                  | Q9NQW7                   | Q9UHL4                 | P28838                 | P09960                    | Q9H4A4           | P29144                  |                                           |
| MM046_1      | 23.0622                 | 20.171                   | 22.85                  | 24.4227                | 25.3898                   | 21.8087          | 21.4741                 |                                           |
| MM041        | 23.6453                 | 22.4343                  | 21.8779                | 25.3869                | 24.4953                   | 23.0703          | 23.7875                 |                                           |
| MM064        | 24.0477                 | 20.1249                  | 24.9022                | 27.0163                | 24.6414                   | 23.46            | 22.3764                 |                                           |
| MM011        | 25.6431                 | 22.006                   | 25.2535                | 26.5284                | 25.2882                   | 24.8026          | 22.734                  |                                           |
| MM057_1      | 25.9195                 | 22.0192                  | 23.0519                | 27.0841                | 25.0626                   | 20.8396          | 21.5957                 |                                           |
| MM025_1      | 18.4328                 | 20.417                   | 23.9986                | 26.8872                | 25.0051                   | 22.0862          | 25.1416                 |                                           |
| MM033_2      | 25.0674                 | 22.6355                  | 26.1266                | 26.4826                | 25.7746                   | 24.116           | 22.8114                 |                                           |
| MM067        | 25.6                    | 21.1613                  | 27.3153                | 25.7634                | 25.9971                   | 21.7843          | 22.3861                 |                                           |
| MM056_2      | 26.313                  | 20.1312                  | 26.4802                | 27.1543                | 23.3142                   | 21.6254          | 22.1818                 |                                           |
| MM007        | 24.861                  | 21.5761                  | 25.0151                | 26.9612                | 25.4009                   | 23.8632          | 21.1166                 |                                           |
| MM078_1      | 23.9489                 | 22.6483                  | 22.9974                | 26.4638                | 27.1167                   | 22.9193          | 23.7535                 |                                           |
| MM095        | 23.6781                 | 21.2209                  | 23.3457                | 25.8649                | 25.3445                   | 21.6841          | 21.4192                 |                                           |
| MM066        | 24.6167                 | 22.175                   | 22.4417                | 25.9771                | 26.668                    | 23.0343          | 23.4504                 |                                           |
| MM043_1      | 23.9473                 | 21.2961                  | 26.1497                | 24.4172                | 25.6131                   | 21.3401          | 22.2604                 |                                           |
| MM020        | 24.5649                 | 21.6766                  | 26.4359                | 25.5937                | 25.2572                   | 23.1864          | 23.0649                 |                                           |
| MM032_1      | 24.0167                 | 21.8801                  | 25.1472                | 25.352                 | 26.1311                   | 21.8363          | 23.7747                 |                                           |
| MM075        | 23.5902                 | 20.9511                  | 24.5484                | 26.2928                | 26.2512                   | 22.6886          | 22.7326                 |                                           |
| MM065        | 25.6811                 | 22.1933                  | 25.7032                | 25.2284                | 25.5199                   | 24.9619          | 23.3307                 |                                           |
| MM074        | 25.8433                 | 22.3259                  | 25.9252                | 25.7135                | 26.5439                   | 21.6282          | 22.8011                 |                                           |
| MM070        | 24.4003                 | 22.4203                  | 18.6387                | 24.1388                | 24.8943                   | 21.4445          | 24.0693                 |                                           |
| MM030_1      | 23.5602                 | 21.3704                  | 24.0748                | 25.3158                | 24.2887                   | 22.4201          | 22.1088                 |                                           |
| MM003        | 23.3209                 | 21.9291                  | 21.1244                | 24.2693                | 24.7248                   | 23.1958          | 22.5174                 |                                           |
| MM045        | 23.8452                 | 21.0479                  | 25.6059                | 26.0471                | 25.901                    | 22.1177          | 21.9017                 |                                           |
|              | 10                      | 12                       | 21                     | 30                     | 25                        | 24               | 32                      | Number of peptides identified by LC-MS/MS |

**Supplementary Table S7. Statistical overview of genes identified as prognostic markers ( $P \leq 0.05$ ) in the FIMM dataset ( $n = 122$ ).**

| Gene           | <i>p</i> -value | Median overall survival, months |                            | Hazard ratio<br>(95% CL) |
|----------------|-----------------|---------------------------------|----------------------------|--------------------------|
|                |                 | High expression<br>(95% CL)     | Low expression<br>(95% CL) |                          |
| <i>XPNPEP1</i> | 0.00012         | 55 (49-96)                      | 122 (94-NA)                | 3.263 (1.749-6.087)      |
| <i>DNPEP</i>   | 0.0056          | 68 (55-100)                     | 127 (124-NA)               | 2.197 (1.215-3.975)      |
| <i>DPP4</i>    | 0.0061          | 122 (94-142)                    | 74 (55-105)                | 0.455 (0.261-0.796)      |
| <i>RNPEP</i>   | 0.0062          | 73 (49-111)                     | 100 (94-NA)                | 2.271 (1.248-4.129)      |
| <i>LAP3</i>    | 0.0085          | 73 (55-120)                     | 105 (89-NA)                | 2.091 (1.195-3.66)       |
| <i>TPP2</i>    | 0.014           | 55 (55-96)                      | 122 (100-142)              | 1.916 (1.118-3.281)      |
| <i>NPEPL1</i>  | 0.017           | 76 (55-105)                     | 124 (94-127)               | 1.836 (1.078-3.129)      |
| <i>METAP2</i>  | 0.019           | 73 (55-96)                      | 122 (100-142)              | 1.857 (1.09-3.162)       |
| <i>DPP3</i>    | 0.02            | 73 (55-100)                     | 120 (105-NA)               | 1.956 (1.108-3.453)      |
| <i>BLMH</i>    | 0.037           | 68 (55-105)                     | 122 (94-NA)                | 1.815 (1.035-3.184)      |
| <i>XPNPEP3</i> | 0.046           | 76 (55-111)                     | 122 (74-NA)                | 1.788 (0.989-3.233)      |

CL: confidence limit; NA: not applicable

## Somatic\_mutation

**Supplementary Table S8. Aminopeptidase gene somatic mutation frequencies from MM patient samples in the FIMM dataset (n=169) (1/12)**

| SampleID | <i>LVRN</i> | <i>BLMH</i> | <i>DPP3</i> | <i>DPP4</i> | <i>DPP7</i> | <i>DPP8</i> | <i>DPP9</i> | <i>ENPEP</i> | <i>ERAPI1</i> | <i>F11</i> | <i>LAP3</i> | <i>LNPEP</i> | <i>METAP2</i> | <i>NAALADLI</i> | <i>NPEPL1</i> |
|----------|-------------|-------------|-------------|-------------|-------------|-------------|-------------|--------------|---------------|------------|-------------|--------------|---------------|-----------------|---------------|
| MM026    | 1           | 0           | 0           | 0           | 0           | 0           | 0           | 0            | 0             | 0          | 0           | 0            | 0             | 0               | 0             |
| MM033_4  | 0           | 0           | 0           | 0           | 0           | 0           | 0           | 0            | 0             | 0          | 0           | 0            | 0             | 0               | 0             |
| MM001    | 0           | 0           | 0           | 0           | 0           | 0           | 0           | 0            | 0             | 0          | 0           | 2            | 0             | 0               | 0             |
| MM034_1  | 1           | 0           | 0           | 0           | 0           | 0           | 0           | 0            | 0             | 0          | 0           | 0            | 0             | 0               | 0             |
| MM037    | 0           | 0           | 0           | 0           | 0           | 0           | 0           | 0            | 0             | 0          | 1           | 0            | 0             | 0               | 0             |
| MM041    | 0           | 0           | 0           | 0           | 0           | 0           | 0           | 0            | 1             | 0          | 0           | 0            | 0             | 0               | 0             |
| MM042    | 0           | 1           | 0           | 0           | 0           | 0           | 0           | 1            | 0             | 0          | 0           | 0            | 0             | 0               | 1             |
| MM043_2  | 0           | 0           | 0           | 0           | 0           | 0           | 0           | 0            | 0             | 0          | 0           | 0            | 0             | 0               | 0             |
| MM048_1  | 0           | 1           | 0           | 0           | 0           | 0           | 0           | 0            | 0             | 0          | 0           | 0            | 0             | 0               | 0             |
| MM048_2  | 0           | 1           | 0           | 0           | 0           | 0           | 0           | 0            | 0             | 0          | 0           | 0            | 0             | 0               | 0             |
| MM060    | 0           | 0           | 0           | 0           | 0           | 0           | 0           | 0            | 0             | 0          | 0           | 0            | 0             | 0               | 0             |
| MM063    | 0           | 0           | 0           | 0           | 0           | 0           | 0           | 0            | 0             | 0          | 0           | 0            | 0             | 0               | 0             |
| MM064    | 0           | 0           | 0           | 0           | 0           | 0           | 0           | 0            | 0             | 0          | 1           | 0            | 0             | 1               | 0             |
| MM065    | 1           | 0           | 0           | 0           | 0           | 0           | 0           | 0            | 0             | 0          | 0           | 0            | 0             | 0               | 0             |
| MM068_2  | 0           | 0           | 0           | 0           | 0           | 0           | 0           | 1            | 0             | 0          | 0           | 0            | 0             | 0               | 0             |
| MM077    | 0           | 0           | 0           | 0           | 0           | 0           | 0           | 0            | 0             | 1          | 0           | 0            | 0             | 0               | 0             |
| MM078_1  | 0           | 0           | 0           | 1           | 0           | 0           | 0           | 0            | 0             | 0          | 0           | 0            | 0             | 0               | 0             |
| MM078_2  | 0           | 0           | 0           | 0           | 0           | 1           | 0           | 0            | 0             | 0          | 0           | 0            | 0             | 0               | 0             |
| MM086    | 0           | 0           | 0           | 0           | 0           | 0           | 0           | 0            | 0             | 0          | 0           | 0            | 1             | 0               | 0             |
| MM096    | 0           | 0           | 1           | 0           | 0           | 0           | 0           | 0            | 0             | 0          | 0           | 0            | 0             | 0               | 1             |
| MM005    | 0           | 0           | 0           | 0           | 0           | 0           | 1           | 0            | 0             | 0          | 0           | 0            | 0             | 0               | 0             |
| MM007    | 0           | 0           | 0           | 0           | 0           | 0           | 0           | 0            | 0             | 0          | 0           | 0            | 0             | 0               | 0             |
| MM010    | 0           | 0           | 0           | 0           | 0           | 0           | 0           | 0            | 0             | 0          | 0           | 0            | 0             | 0               | 0             |
| MM017_2  | 0           | 0           | 0           | 0           | 0           | 0           | 0           | 0            | 0             | 0          | 0           | 0            | 0             | 0               | 0             |
| MM025_1  | 0           | 0           | 0           | 0           | 0           | 0           | 0           | 0            | 0             | 0          | 0           | 0            | 0             | 0               | 0             |
| MM025_2  | 0           | 0           | 0           | 0           | 0           | 0           | 0           | 0            | 0             | 0          | 0           | 0            | 0             | 0               | 0             |
| MM055    | 0           | 0           | 0           | 0           | 0           | 0           | 0           | 0            | 0             | 0          | 0           | 0            | 0             | 0               | 0             |
| MM098    | 0           | 0           | 0           | 0           | 0           | 0           | 0           | 0            | 0             | 0          | 0           | 0            | 0             | 0               | 0             |
| MM101    | 0           | 0           | 0           | 1           | 0           | 0           | 0           | 0            | 0             | 0          | 0           | 0            | 0             | 0               | 0             |
| MM103    | 0           | 0           | 0           | 0           | 0           | 0           | 0           | 0            | 1             | 0          | 0           | 0            | 0             | 0               | 0             |
| MM104    | 0           | 0           | 0           | 0           | 0           | 0           | 0           | 0            | 0             | 0          | 0           | 0            | 0             | 0               | 0             |
| MM107    | 0           | 0           | 0           | 0           | 0           | 0           | 0           | 0            | 0             | 0          | 0           | 0            | 0             | 0               | 0             |

## Somatic\_mutation

Supplementary Table S8. Aminopeptidase gene somatic mutation frequencies from MM patient samples in the FIMM dataset (n=169) (2/12)

| SampleID | <i>LVRN</i> | <i>BLMH</i> | <i>DPP3</i> | <i>DPP4</i> | <i>DPP7</i> | <i>DPP8</i> | <i>DPP9</i> | <i>ENPEP</i> | <i>ERAPI1</i> | <i>FII</i> | <i>LAP3</i> | <i>LNPEP</i> | <i>METAP2</i> | <i>NAALADLI</i> | <i>NPEPL1</i> |
|----------|-------------|-------------|-------------|-------------|-------------|-------------|-------------|--------------|---------------|------------|-------------|--------------|---------------|-----------------|---------------|
| MM115    | 0           | 0           | 0           | 0           | 0           | 0           | 0           | 0            | 0             | 0          | 0           | 0            | 0             | 0               | 0             |
| MM120    | 0           | 0           | 0           | 0           | 0           | 0           | 0           | 0            | 0             | 0          | 0           | 0            | 0             | 0               | 0             |
| MM122    | 0           | 0           | 0           | 0           | 0           | 0           | 0           | 0            | 0             | 0          | 0           | 0            | 0             | 0               | 0             |
| MM124    | 0           | 0           | 0           | 0           | 0           | 0           | 0           | 0            | 0             | 0          | 0           | 0            | 0             | 0               | 0             |
| MM135    | 0           | 0           | 0           | 0           | 0           | 0           | 0           | 0            | 0             | 0          | 0           | 0            | 0             | 0               | 0             |
| MM137    | 1           | 0           | 0           | 0           | 1           | 0           | 0           | 0            | 0             | 0          | 0           | 0            | 0             | 0               | 0             |
| MM139    | 0           | 0           | 0           | 0           | 0           | 0           | 0           | 0            | 0             | 0          | 0           | 0            | 0             | 0               | 0             |
| MM006    | 0           | 0           | 0           | 0           | 1           | 0           | 0           | 0            | 0             | 0          | 0           | 0            | 0             | 0               | 0             |
| MM002_1  | 0           | 0           | 0           | 0           | 0           | 0           | 0           | 0            | 0             | 0          | 0           | 0            | 0             | 0               | 0             |
| MM002_2  | 0           | 0           | 0           | 0           | 0           | 0           | 0           | 0            | 0             | 0          | 0           | 0            | 0             | 0               | 0             |
| MM002_3  | 0           | 0           | 0           | 0           | 0           | 0           | 0           | 0            | 0             | 0          | 0           | 0            | 0             | 0               | 0             |
| MM003    | 0           | 0           | 0           | 0           | 0           | 0           | 0           | 0            | 0             | 0          | 0           | 0            | 0             | 0               | 0             |
| MM004    | 0           | 0           | 0           | 0           | 0           | 0           | 0           | 0            | 0             | 0          | 0           | 0            | 0             | 0               | 0             |
| MM008    | 0           | 0           | 0           | 0           | 0           | 0           | 0           | 0            | 0             | 0          | 0           | 0            | 0             | 0               | 0             |
| MM009    | 0           | 0           | 0           | 0           | 0           | 0           | 0           | 0            | 0             | 0          | 0           | 0            | 0             | 0               | 0             |
| MM011    | 0           | 0           | 0           | 0           | 0           | 0           | 0           | 0            | 0             | 0          | 0           | 0            | 0             | 0               | 0             |
| MM013    | 0           | 0           | 0           | 0           | 0           | 0           | 0           | 0            | 0             | 0          | 0           | 0            | 0             | 0               | 0             |
| MM014_1  | 0           | 0           | 0           | 0           | 0           | 0           | 0           | 0            | 0             | 0          | 0           | 0            | 0             | 0               | 0             |
| MM014_2  | 0           | 0           | 0           | 0           | 0           | 0           | 0           | 0            | 0             | 0          | 0           | 0            | 0             | 0               | 0             |
| MM014_3  | 0           | 0           | 0           | 0           | 0           | 0           | 0           | 0            | 0             | 0          | 0           | 0            | 0             | 0               | 0             |
| MM014_4  | 0           | 0           | 0           | 0           | 0           | 0           | 0           | 0            | 0             | 0          | 0           | 0            | 0             | 0               | 0             |
| MM015    | 0           | 0           | 0           | 0           | 0           | 0           | 0           | 0            | 0             | 0          | 0           | 0            | 0             | 0               | 0             |
| MM016    | 0           | 0           | 0           | 0           | 0           | 0           | 0           | 0            | 0             | 0          | 0           | 0            | 0             | 0               | 0             |
| MM017_1  | 0           | 0           | 0           | 0           | 0           | 0           | 0           | 0            | 0             | 0          | 0           | 0            | 0             | 0               | 0             |
| MM017_3  | 0           | 0           | 0           | 0           | 0           | 0           | 0           | 0            | 0             | 0          | 0           | 0            | 0             | 0               | 0             |
| MM019    | 0           | 0           | 0           | 0           | 0           | 0           | 0           | 0            | 0             | 0          | 0           | 0            | 0             | 0               | 0             |
| MM020    | 0           | 0           | 0           | 0           | 0           | 0           | 0           | 0            | 0             | 0          | 0           | 0            | 0             | 0               | 0             |
| MM022_1  | 0           | 0           | 0           | 0           | 0           | 0           | 0           | 0            | 0             | 0          | 0           | 0            | 0             | 0               | 0             |
| MM022_2  | 0           | 0           | 0           | 0           | 0           | 0           | 0           | 0            | 0             | 0          | 0           | 0            | 0             | 0               | 0             |
| MM022_3  | 0           | 0           | 0           | 0           | 0           | 0           | 0           | 0            | 0             | 0          | 0           | 0            | 0             | 0               | 0             |
| MM023    | 0           | 0           | 0           | 0           | 0           | 0           | 0           | 0            | 0             | 0          | 0           | 0            | 0             | 0               | 0             |
| MM024    | 0           | 0           | 0           | 0           | 0           | 0           | 0           | 0            | 0             | 0          | 0           | 0            | 0             | 0               | 0             |

## Somatic\_mutation

**Supplementary Table S8. Aminopeptidase gene somatic mutation frequencies from MM patient samples in the FIMM dataset (n=169) (3/12)**

| SampleID | <i>LVRN</i> | <i>BLMH</i> | <i>DPP3</i> | <i>DPP4</i> | <i>DPP7</i> | <i>DPP8</i> | <i>DPP9</i> | <i>ENPEP</i> | <i>ERAP1</i> | <i>F11</i> | <i>LAP3</i> | <i>LNPEP</i> | <i>METAP2</i> | <i>NAALADLI</i> | <i>NPEPL1</i> |
|----------|-------------|-------------|-------------|-------------|-------------|-------------|-------------|--------------|--------------|------------|-------------|--------------|---------------|-----------------|---------------|
| MM027    | 0           | 0           | 0           | 0           | 0           | 0           | 0           | 0            | 0            | 0          | 0           | 0            | 0             | 0               | 0             |
| MM028    | 0           | 0           | 0           | 0           | 0           | 0           | 0           | 0            | 0            | 0          | 0           | 0            | 0             | 0               | 0             |
| MM029    | 0           | 0           | 0           | 0           | 0           | 0           | 0           | 0            | 0            | 0          | 0           | 0            | 0             | 0               | 0             |
| MM030_1  | 0           | 0           | 0           | 0           | 0           | 0           | 0           | 0            | 0            | 0          | 0           | 0            | 0             | 0               | 0             |
| MM030_2  | 0           | 0           | 0           | 0           | 0           | 0           | 0           | 0            | 0            | 0          | 0           | 0            | 0             | 0               | 0             |
| MM031_2  | 0           | 0           | 0           | 0           | 0           | 0           | 0           | 0            | 0            | 0          | 0           | 0            | 0             | 0               | 0             |
| MM032_1  | 0           | 0           | 0           | 0           | 0           | 0           | 0           | 0            | 0            | 0          | 0           | 0            | 0             | 0               | 0             |
| MM032_2  | 0           | 0           | 0           | 0           | 0           | 0           | 0           | 0            | 0            | 0          | 0           | 0            | 0             | 0               | 0             |
| MM033_1  | 0           | 0           | 0           | 0           | 0           | 0           | 0           | 0            | 0            | 0          | 0           | 0            | 0             | 0               | 0             |
| MM033_2  | 0           | 0           | 0           | 0           | 0           | 0           | 0           | 0            | 0            | 0          | 0           | 0            | 0             | 0               | 0             |
| MM033_3  | 0           | 0           | 0           | 0           | 0           | 0           | 0           | 0            | 0            | 0          | 0           | 0            | 0             | 0               | 0             |
| MM034_2  | 0           | 0           | 0           | 0           | 0           | 0           | 0           | 0            | 0            | 0          | 0           | 0            | 0             | 0               | 0             |
| MM035    | 0           | 0           | 0           | 0           | 0           | 0           | 0           | 0            | 0            | 0          | 0           | 0            | 0             | 0               | 0             |
| MM036_1  | 0           | 0           | 0           | 0           | 0           | 0           | 0           | 0            | 0            | 0          | 0           | 0            | 0             | 0               | 0             |
| MM036_2  | 0           | 0           | 0           | 0           | 0           | 0           | 0           | 0            | 0            | 0          | 0           | 0            | 0             | 0               | 0             |
| MM038    | 0           | 0           | 0           | 0           | 0           | 0           | 0           | 0            | 0            | 0          | 0           | 0            | 0             | 0               | 0             |
| MM039    | 0           | 0           | 0           | 0           | 0           | 0           | 0           | 0            | 0            | 0          | 0           | 0            | 0             | 0               | 0             |
| MM040    | 0           | 0           | 0           | 0           | 0           | 0           | 0           | 0            | 0            | 0          | 0           | 0            | 0             | 0               | 0             |
| MM043_1  | 0           | 0           | 0           | 0           | 0           | 0           | 0           | 0            | 0            | 0          | 0           | 0            | 0             | 0               | 0             |
| MM044    | 0           | 0           | 0           | 0           | 0           | 0           | 0           | 0            | 0            | 0          | 0           | 0            | 0             | 0               | 0             |
| MM045    | 0           | 0           | 0           | 0           | 0           | 0           | 0           | 0            | 0            | 0          | 0           | 0            | 0             | 0               | 0             |
| MM046_1  | 0           | 0           | 0           | 0           | 0           | 0           | 0           | 0            | 0            | 0          | 0           | 0            | 0             | 0               | 0             |
| MM046_2  | 0           | 0           | 0           | 0           | 0           | 0           | 0           | 0            | 0            | 0          | 0           | 0            | 0             | 0               | 0             |
| MM047    | 0           | 0           | 0           | 0           | 0           | 0           | 0           | 0            | 0            | 0          | 0           | 0            | 0             | 0               | 0             |
| MM049    | 0           | 0           | 0           | 0           | 0           | 0           | 0           | 0            | 0            | 0          | 0           | 0            | 0             | 0               | 0             |
| MM050    | 0           | 0           | 0           | 0           | 0           | 0           | 0           | 0            | 0            | 0          | 0           | 0            | 0             | 0               | 0             |
| MM051_1  | 0           | 0           | 0           | 0           | 0           | 0           | 0           | 0            | 0            | 0          | 0           | 0            | 0             | 0               | 0             |
| MM051_2  | 0           | 0           | 0           | 0           | 0           | 0           | 0           | 0            | 0            | 0          | 0           | 0            | 0             | 0               | 0             |
| MM052_1  | 0           | 0           | 0           | 0           | 0           | 0           | 0           | 0            | 0            | 0          | 0           | 0            | 0             | 0               | 0             |
| MM052_2  | 0           | 0           | 0           | 0           | 0           | 0           | 0           | 0            | 0            | 0          | 0           | 0            | 0             | 0               | 0             |
| MM053    | 0           | 0           | 0           | 0           | 0           | 0           | 0           | 0            | 0            | 0          | 0           | 0            | 0             | 0               | 0             |
| MM054    | 0           | 0           | 0           | 0           | 0           | 0           | 0           | 0            | 0            | 0          | 0           | 0            | 0             | 0               | 0             |

## Somatic\_mutation

**Supplementary Table S8. Aminopeptidase gene somatic mutation frequencies from MM patient samples in the FIMM dataset (n=169) (4/12)**

| SampleID | <i>LVRN</i> | <i>BLMH</i> | <i>DPP3</i> | <i>DPP4</i> | <i>DPP7</i> | <i>DPP8</i> | <i>DPP9</i> | <i>ENPEP</i> | <i>ERAPI1</i> | <i>FII</i> | <i>LAP3</i> | <i>LNPEP</i> | <i>METAP2</i> | <i>NAALADLI</i> | <i>NPEPL1</i> |
|----------|-------------|-------------|-------------|-------------|-------------|-------------|-------------|--------------|---------------|------------|-------------|--------------|---------------|-----------------|---------------|
| MM056_1  | 0           | 0           | 0           | 0           | 0           | 0           | 0           | 0            | 0             | 0          | 0           | 0            | 0             | 0               | 0             |
| MM056_2  | 0           | 0           | 0           | 0           | 0           | 0           | 0           | 0            | 0             | 0          | 0           | 0            | 0             | 0               | 0             |
| MM057_1  | 0           | 0           | 0           | 0           | 0           | 0           | 0           | 0            | 0             | 0          | 0           | 0            | 0             | 0               | 0             |
| MM057_2  | 0           | 0           | 0           | 0           | 0           | 0           | 0           | 0            | 0             | 0          | 0           | 0            | 0             | 0               | 0             |
| MM057_3  | 0           | 0           | 0           | 0           | 0           | 0           | 0           | 0            | 0             | 0          | 0           | 0            | 0             | 0               | 0             |
| MM057_4  | 0           | 0           | 0           | 0           | 0           | 0           | 0           | 0            | 0             | 0          | 0           | 0            | 0             | 0               | 0             |
| MM057_5  | 0           | 0           | 0           | 0           | 0           | 0           | 0           | 0            | 0             | 0          | 0           | 0            | 0             | 0               | 0             |
| MM057_6  | 0           | 0           | 0           | 0           | 0           | 0           | 0           | 0            | 0             | 0          | 0           | 0            | 0             | 0               | 0             |
| MM058_1  | 0           | 0           | 0           | 0           | 0           | 0           | 0           | 0            | 0             | 0          | 0           | 0            | 0             | 0               | 0             |
| MM058_2  | 0           | 0           | 0           | 0           | 0           | 0           | 0           | 0            | 0             | 0          | 0           | 0            | 0             | 0               | 0             |
| MM059    | 0           | 0           | 0           | 0           | 0           | 0           | 0           | 0            | 0             | 0          | 0           | 0            | 0             | 0               | 0             |
| MM061_1  | 0           | 0           | 0           | 0           | 0           | 0           | 0           | 0            | 0             | 0          | 0           | 0            | 0             | 0               | 0             |
| MM061_2  | 0           | 0           | 0           | 0           | 0           | 0           | 0           | 0            | 0             | 0          | 0           | 0            | 0             | 0               | 0             |
| MM062    | 0           | 0           | 0           | 0           | 0           | 0           | 0           | 0            | 0             | 0          | 0           | 0            | 0             | 0               | 0             |
| MM066    | 0           | 0           | 0           | 0           | 0           | 0           | 0           | 0            | 0             | 0          | 0           | 0            | 0             | 0               | 0             |
| MM067    | 0           | 0           | 0           | 0           | 0           | 0           | 0           | 0            | 0             | 0          | 0           | 0            | 0             | 0               | 0             |
| MM068_1  | 0           | 0           | 0           | 0           | 0           | 0           | 0           | 0            | 0             | 0          | 0           | 0            | 0             | 0               | 0             |
| MM069    | 0           | 0           | 0           | 0           | 0           | 0           | 0           | 0            | 0             | 0          | 0           | 0            | 0             | 0               | 0             |
| MM070    | 0           | 0           | 0           | 0           | 0           | 0           | 0           | 0            | 0             | 0          | 0           | 0            | 0             | 0               | 0             |
| MM071    | 0           | 0           | 0           | 0           | 0           | 0           | 0           | 0            | 0             | 0          | 0           | 0            | 0             | 0               | 0             |
| MM072    | 0           | 0           | 0           | 0           | 0           | 0           | 0           | 0            | 0             | 0          | 0           | 0            | 0             | 0               | 0             |
| MM073    | 0           | 0           | 0           | 0           | 0           | 0           | 0           | 0            | 0             | 0          | 0           | 0            | 0             | 0               | 0             |
| MM074    | 0           | 0           | 0           | 0           | 0           | 0           | 0           | 0            | 0             | 0          | 0           | 0            | 0             | 0               | 0             |
| MM075    | 0           | 0           | 0           | 0           | 0           | 0           | 0           | 0            | 0             | 0          | 0           | 0            | 0             | 0               | 0             |
| MM076    | 0           | 0           | 0           | 0           | 0           | 0           | 0           | 0            | 0             | 0          | 0           | 0            | 0             | 0               | 0             |
| MM079    | 0           | 0           | 0           | 0           | 0           | 0           | 0           | 0            | 0             | 0          | 0           | 0            | 0             | 0               | 0             |
| MM080    | 0           | 0           | 0           | 0           | 0           | 0           | 0           | 0            | 0             | 0          | 0           | 0            | 0             | 0               | 0             |
| MM081    | 0           | 0           | 0           | 0           | 0           | 0           | 0           | 0            | 0             | 0          | 0           | 0            | 0             | 0               | 0             |
| MM082    | 0           | 0           | 0           | 0           | 0           | 0           | 0           | 0            | 0             | 0          | 0           | 0            | 0             | 0               | 0             |
| MM083_1  | 0           | 0           | 0           | 0           | 0           | 0           | 0           | 0            | 0             | 0          | 0           | 0            | 0             | 0               | 0             |
| MM083_2  | 0           | 0           | 0           | 0           | 0           | 0           | 0           | 0            | 0             | 0          | 0           | 0            | 0             | 0               | 0             |
| MM084    | 0           | 0           | 0           | 0           | 0           | 0           | 0           | 0            | 0             | 0          | 0           | 0            | 0             | 0               | 0             |

## Somatic\_mutation

**Supplementary Table S8. Aminopeptidase gene somatic mutation frequencies from MM patient samples in the FIMM dataset (n=169) (5/12)**

| SampleID | <i>LVRN</i> | <i>BLMH</i> | <i>DPP3</i> | <i>DPP4</i> | <i>DPP7</i> | <i>DPP8</i> | <i>DPP9</i> | <i>ENPEP</i> | <i>ERAPI1</i> | <i>F11</i> | <i>LAP3</i> | <i>LNPEP</i> | <i>METAP2</i> | <i>NAALADLI</i> | <i>NPEPL1</i> |
|----------|-------------|-------------|-------------|-------------|-------------|-------------|-------------|--------------|---------------|------------|-------------|--------------|---------------|-----------------|---------------|
| MM085    | 0           | 0           | 0           | 0           | 0           | 0           | 0           | 0            | 0             | 0          | 0           | 0            | 0             | 0               | 0             |
| MM087    | 0           | 0           | 0           | 0           | 0           | 0           | 0           | 0            | 0             | 0          | 0           | 0            | 0             | 0               | 0             |
| MM088    | 0           | 0           | 0           | 0           | 0           | 0           | 0           | 0            | 0             | 0          | 0           | 0            | 0             | 0               | 0             |
| MM089    | 0           | 0           | 0           | 0           | 0           | 0           | 0           | 0            | 0             | 0          | 0           | 0            | 0             | 0               | 0             |
| MM090    | 0           | 0           | 0           | 0           | 0           | 0           | 0           | 0            | 0             | 0          | 0           | 0            | 0             | 0               | 0             |
| MM091    | 0           | 0           | 0           | 0           | 0           | 0           | 0           | 0            | 0             | 0          | 0           | 0            | 0             | 0               | 0             |
| MM092    | 0           | 0           | 0           | 0           | 0           | 0           | 0           | 0            | 0             | 0          | 0           | 0            | 0             | 0               | 0             |
| MM093    | 0           | 0           | 0           | 0           | 0           | 0           | 0           | 0            | 0             | 0          | 0           | 0            | 0             | 0               | 0             |
| MM094    | 0           | 0           | 0           | 0           | 0           | 0           | 0           | 0            | 0             | 0          | 0           | 0            | 0             | 0               | 0             |
| MM095    | 0           | 0           | 0           | 0           | 0           | 0           | 0           | 0            | 0             | 0          | 0           | 0            | 0             | 0               | 0             |
| MM097    | 0           | 0           | 0           | 0           | 0           | 0           | 0           | 0            | 0             | 0          | 0           | 0            | 0             | 0               | 0             |
| MM099    | 0           | 0           | 0           | 0           | 0           | 0           | 0           | 0            | 0             | 0          | 0           | 0            | 0             | 0               | 0             |
| MM100    | 0           | 0           | 0           | 0           | 0           | 0           | 0           | 0            | 0             | 0          | 0           | 0            | 0             | 0               | 0             |
| MM102    | 0           | 0           | 0           | 0           | 0           | 0           | 0           | 0            | 0             | 0          | 0           | 0            | 0             | 0               | 0             |
| MM105    | 0           | 0           | 0           | 0           | 0           | 0           | 0           | 0            | 0             | 0          | 0           | 0            | 0             | 0               | 0             |
| MM108    | 0           | 0           | 0           | 0           | 0           | 0           | 0           | 0            | 0             | 0          | 0           | 0            | 0             | 0               | 0             |
| MM109    | 0           | 0           | 0           | 0           | 0           | 0           | 0           | 0            | 0             | 0          | 0           | 0            | 0             | 0               | 0             |
| MM110    | 0           | 0           | 0           | 0           | 0           | 0           | 0           | 0            | 0             | 0          | 0           | 0            | 0             | 0               | 0             |
| MM111_1  | 0           | 0           | 0           | 0           | 0           | 0           | 0           | 0            | 0             | 0          | 0           | 0            | 0             | 0               | 0             |
| MM111_2  | 0           | 0           | 0           | 0           | 0           | 0           | 0           | 0            | 0             | 0          | 0           | 0            | 0             | 0               | 0             |
| MM113_1  | 0           | 0           | 0           | 0           | 0           | 0           | 0           | 0            | 0             | 0          | 0           | 0            | 0             | 0               | 0             |
| MM113_2  | 0           | 0           | 0           | 0           | 0           | 0           | 0           | 0            | 0             | 0          | 0           | 0            | 0             | 0               | 0             |
| MM114    | 0           | 0           | 0           | 0           | 0           | 0           | 0           | 0            | 0             | 0          | 0           | 0            | 0             | 0               | 0             |
| MM116    | 0           | 0           | 0           | 0           | 0           | 0           | 0           | 0            | 0             | 0          | 0           | 0            | 0             | 0               | 0             |
| MM117_1  | 0           | 0           | 0           | 0           | 0           | 0           | 0           | 0            | 0             | 0          | 0           | 0            | 0             | 0               | 0             |
| MM117_2  | 0           | 0           | 0           | 0           | 0           | 0           | 0           | 0            | 0             | 0          | 0           | 0            | 0             | 0               | 0             |
| MM118    | 0           | 0           | 0           | 0           | 0           | 0           | 0           | 0            | 0             | 0          | 0           | 0            | 0             | 0               | 0             |
| MM119    | 0           | 0           | 0           | 0           | 0           | 0           | 0           | 0            | 0             | 0          | 0           | 0            | 0             | 0               | 0             |
| MM121    | 0           | 0           | 0           | 0           | 0           | 0           | 0           | 0            | 0             | 0          | 0           | 0            | 0             | 0               | 0             |
| MM123    | 0           | 0           | 0           | 0           | 0           | 0           | 0           | 0            | 0             | 0          | 0           | 0            | 0             | 0               | 0             |
| MM126    | 0           | 0           | 0           | 0           | 0           | 0           | 0           | 0            | 0             | 0          | 0           | 0            | 0             | 0               | 0             |
| MM128_1  | 0           | 0           | 0           | 0           | 0           | 0           | 0           | 0            | 0             | 0          | 0           | 0            | 0             | 0               | 0             |

Somatic\_mutation

**Supplementary Table S8. Aminopeptidase gene somatic mutation frequencies from MM patient samples in the FIMM dataset (n=169) (6/12)**

| SampleID            | <i>LVRN</i>  | <i>BLMH</i>     | <i>DPP3</i>   | <i>DPP4</i>   | <i>DPP7</i>   | <i>DPP8</i>   | <i>DPP9</i>   | <i>ENPEP</i>  | <i>ERAPI</i>    | <i>FII</i>     | <i>LAP3</i>  | <i>LNPEP</i>  | <i>METAP2</i>   | <i>NAALADLI</i>   | <i>NPEPL1</i>      |
|---------------------|--------------|-----------------|---------------|---------------|---------------|---------------|---------------|---------------|-----------------|----------------|--------------|---------------|-----------------|-------------------|--------------------|
| MM129               | 0            | 0               | 0             | 0             | 0             | 0             | 0             | 0             | 0               | 0              | 0            | 0             | 0               | 0                 | 0                  |
| MM130               | 0            | 0               | 0             | 0             | 0             | 0             | 0             | 0             | 0               | 0              | 0            | 0             | 0               | 0                 | 0                  |
| MM131               | 0            | 0               | 0             | 0             | 0             | 0             | 0             | 0             | 0               | 0              | 0            | 0             | 0               | 0                 | 0                  |
| MM132               | 0            | 0               | 0             | 0             | 0             | 0             | 0             | 0             | 0               | 0              | 0            | 0             | 0               | 0                 | 0                  |
| MM133               | 0            | 0               | 0             | 0             | 0             | 0             | 0             | 0             | 0               | 0              | 0            | 0             | 0               | 0                 | 0                  |
| MM134               | 0            | 0               | 0             | 0             | 0             | 0             | 0             | 0             | 0               | 0              | 0            | 0             | 0               | 0                 | 0                  |
| MM136               | 0            | 0               | 0             | 0             | 0             | 0             | 0             | 0             | 0               | 0              | 0            | 0             | 0               | 0                 | 0                  |
| MM138               | 0            | 0               | 0             | 0             | 0             | 0             | 0             | 0             | 0               | 0              | 0            | 0             | 0               | 0                 | 0                  |
| MM140               | 0            | 0               | 0             | 0             | 0             | 0             | 0             | 0             | 0               | 0              | 0            | 0             | 0               | 0                 | 0                  |
| <b>Frequency(%)</b> | <b>2,367</b> | <b>1,775148</b> | <b>0,5917</b> | <b>1,1834</b> | <b>1,1834</b> | <b>0,5917</b> | <b>0,5917</b> | <b>1,1834</b> | <b>1,183432</b> | <b>0,59172</b> | <b>1,183</b> | <b>1,1834</b> | <b>0,591716</b> | <b>0,59171598</b> | <b>1,183431953</b> |



## Somatic\_mutation

**Supplementary Table S8. Aminopeptidase gene somatic mutation frequencies from MM patient samples in the FIMM dataset (n=169) (7/12)**

| SampleID | <i>NPEPPS</i> | <i>RNPEPL1</i> | <i>TPP1</i> | <i>TPP2</i> | <i>TRHDE</i> | <i>XPNPEP2</i> | <i>XPNPEP3</i> | Gene symbol |
|----------|---------------|----------------|-------------|-------------|--------------|----------------|----------------|-------------|
| MM026    | 0             | 0              | 0           | 0           | 0            | 0              | 0              |             |
| MM033_4  | 0             | 0              | 0           | 0           | 0            | 0              | 0              |             |
| MM001    | 0             | 0              | 0           | 0           | 0            | 0              | 0              |             |
| MM034_1  | 0             | 0              | 0           | 0           | 0            | 0              | 0              |             |
| MM037    | 0             | 0              | 0           | 0           | 0            | 0              | 0              |             |
| MM041    | 0             | 0              | 0           | 0           | 0            | 0              | 0              |             |
| MM042    | 0             | 0              | 0           | 0           | 0            | 0              | 0              |             |
| MM043_2  | 0             | 0              | 0           | 0           | 0            | 0              | 0              |             |
| MM048_1  | 0             | 0              | 0           | 0           | 0            | 0              | 0              |             |
| MM048_2  | 0             | 0              | 0           | 0           | 0            | 0              | 0              |             |
| MM060    | 0             | 0              | 0           | 0           | 0            | 0              | 0              |             |
| MM063    | 1             | 0              | 0           | 0           | 0            | 0              | 0              |             |
| MM064    | 0             | 0              | 0           | 0           | 0            | 0              | 0              |             |
| MM065    | 0             | 0              | 0           | 0           | 0            | 0              | 0              |             |
| MM068_2  | 0             | 0              | 0           | 0           | 0            | 0              | 0              |             |
| MM077    | 0             | 0              | 0           | 0           | 0            | 0              | 0              |             |
| MM078_1  | 0             | 0              | 0           | 1           | 0            | 0              | 0              |             |
| MM078_2  | 0             | 0              | 0           | 0           | 0            | 0              | 0              |             |
| MM086    | 0             | 0              | 0           | 0           | 0            | 0              | 0              |             |
| MM096    | 0             | 0              | 0           | 0           | 0            | 0              | 0              |             |
| MM005    | 0             | 0              | 0           | 0           | 0            | 0              | 0              |             |
| MM007    | 0             | 0              | 0           | 0           | 0            | 0              | 0              |             |
| MM010    | 0             | 0              | 0           | 0           | 0            | 0              | 0              |             |
| MM017_2  | 1             | 0              | 0           | 0           | 0            | 0              | 0              |             |
| MM025_1  | 0             | 0              | 0           | 0           | 0            | 1              | 0              |             |
| MM025_2  | 0             | 0              | 1           | 0           | 0            | 1              | 0              |             |
| MM055    | 0             | 0              | 0           | 0           | 0            | 0              | 0              |             |
| MM098    | 0             | 0              | 0           | 0           | 0            | 0              | 0              |             |
| MM101    | 0             | 0              | 0           | 0           | 0            | 0              | 0              |             |
| MM103    | 0             | 0              | 0           | 0           | 0            | 0              | 0              |             |
| MM104    | 0             | 1              | 0           | 0           | 0            | 0              | 0              |             |
| MM107    | 0             | 0              | 0           | 0           | 0            | 0              | 0              |             |

## Somatic\_mutation

**Supplementary Table S8. Aminopeptidase gene somatic mutation frequencies from MM patient samples in the FIMM dataset (n=169) (8/12)**

| SampleID | <i>NPEPPS</i> | <i>RNPEPL1</i> | <i>TPP1</i> | <i>TPP2</i> | <i>TRHDE</i> | <i>XPNPEP2</i> | <i>XPNPEP3</i> | Gene symbol |
|----------|---------------|----------------|-------------|-------------|--------------|----------------|----------------|-------------|
| MM115    | 1             | 0              | 0           | 0           | 0            | 0              | 0              |             |
| MM120    | 1             | 0              | 0           | 0           | 0            | 0              | 0              |             |
| MM122    | 0             | 0              | 0           | 0           | 0            | 0              | 0              | 1           |
| MM124    | 0             | 0              | 0           | 0           | 1            | 0              | 0              |             |
| MM135    | 0             | 0              | 0           | 0           | 0            | 0              | 0              |             |
| MM137    | 0             | 1              | 0           | 0           | 0            | 0              | 0              |             |
| MM139    | 0             | 0              | 0           | 0           | 1            | 0              | 0              |             |
| MM006    | 0             | 0              | 0           | 0           | 0            | 0              | 0              |             |
| MM002_1  | 0             | 0              | 0           | 0           | 0            | 0              | 0              |             |
| MM002_2  | 0             | 0              | 0           | 0           | 0            | 0              | 0              |             |
| MM002_3  | 0             | 0              | 0           | 0           | 0            | 0              | 0              |             |
| MM003    | 0             | 0              | 0           | 0           | 0            | 0              | 0              |             |
| MM004    | 0             | 0              | 0           | 0           | 0            | 0              | 0              |             |
| MM008    | 0             | 0              | 0           | 0           | 0            | 0              | 0              |             |
| MM009    | 0             | 0              | 0           | 0           | 0            | 0              | 0              |             |
| MM011    | 0             | 0              | 0           | 0           | 0            | 0              | 0              |             |
| MM013    | 0             | 0              | 0           | 0           | 0            | 0              | 0              |             |
| MM014_1  | 0             | 0              | 0           | 0           | 0            | 0              | 0              |             |
| MM014_2  | 0             | 0              | 0           | 0           | 0            | 0              | 0              |             |
| MM014_3  | 0             | 0              | 0           | 0           | 0            | 0              | 0              |             |
| MM014_4  | 0             | 0              | 0           | 0           | 0            | 0              | 0              |             |
| MM015    | 0             | 0              | 0           | 0           | 0            | 0              | 0              |             |
| MM016    | 0             | 0              | 0           | 0           | 0            | 0              | 0              |             |
| MM017_1  | 0             | 0              | 0           | 0           | 0            | 0              | 0              |             |
| MM017_3  | 0             | 0              | 0           | 0           | 0            | 0              | 0              |             |
| MM019    | 0             | 0              | 0           | 0           | 0            | 0              | 0              |             |
| MM020    | 0             | 0              | 0           | 0           | 0            | 0              | 0              |             |
| MM022_1  | 0             | 0              | 0           | 0           | 0            | 0              | 0              |             |
| MM022_2  | 0             | 0              | 0           | 0           | 0            | 0              | 0              |             |
| MM022_3  | 0             | 0              | 0           | 0           | 0            | 0              | 0              |             |
| MM023    | 0             | 0              | 0           | 0           | 0            | 0              | 0              |             |
| MM024    | 0             | 0              | 0           | 0           | 0            | 0              | 0              |             |

## Somatic\_mutation

**Supplementary Table S8. Aminopeptidase gene somatic mutation frequencies from MM patient samples in the FIMM dataset (n=169) (9/12)**

| SampleID | <i>NPEPPS</i> | <i>RNPEPL1</i> | <i>TPP1</i> | <i>TPP2</i> | <i>TRHDE</i> | <i>XPNPEP2</i> | <i>XPNPEP3</i> | Gene symbol |
|----------|---------------|----------------|-------------|-------------|--------------|----------------|----------------|-------------|
| MM027    | 0             | 0              | 0           | 0           | 0            | 0              | 0              |             |
| MM028    | 0             | 0              | 0           | 0           | 0            | 0              | 0              |             |
| MM029    | 0             | 0              | 0           | 0           | 0            | 0              | 0              |             |
| MM030_1  | 0             | 0              | 0           | 0           | 0            | 0              | 0              |             |
| MM030_2  | 0             | 0              | 0           | 0           | 0            | 0              | 0              |             |
| MM031_2  | 0             | 0              | 0           | 0           | 0            | 0              | 0              |             |
| MM032_1  | 0             | 0              | 0           | 0           | 0            | 0              | 0              |             |
| MM032_2  | 0             | 0              | 0           | 0           | 0            | 0              | 0              |             |
| MM033_1  | 0             | 0              | 0           | 0           | 0            | 0              | 0              |             |
| MM033_2  | 0             | 0              | 0           | 0           | 0            | 0              | 0              |             |
| MM033_3  | 0             | 0              | 0           | 0           | 0            | 0              | 0              |             |
| MM034_2  | 0             | 0              | 0           | 0           | 0            | 0              | 0              |             |
| MM035    | 0             | 0              | 0           | 0           | 0            | 0              | 0              |             |
| MM036_1  | 0             | 0              | 0           | 0           | 0            | 0              | 0              |             |
| MM036_2  | 0             | 0              | 0           | 0           | 0            | 0              | 0              |             |
| MM038    | 0             | 0              | 0           | 0           | 0            | 0              | 0              |             |
| MM039    | 0             | 0              | 0           | 0           | 0            | 0              | 0              |             |
| MM040    | 0             | 0              | 0           | 0           | 0            | 0              | 0              |             |
| MM043_1  | 0             | 0              | 0           | 0           | 0            | 0              | 0              |             |
| MM044    | 0             | 0              | 0           | 0           | 0            | 0              | 0              |             |
| MM045    | 0             | 0              | 0           | 0           | 0            | 0              | 0              |             |
| MM046_1  | 0             | 0              | 0           | 0           | 0            | 0              | 0              |             |
| MM046_2  | 0             | 0              | 0           | 0           | 0            | 0              | 0              |             |
| MM047    | 0             | 0              | 0           | 0           | 0            | 0              | 0              |             |
| MM049    | 0             | 0              | 0           | 0           | 0            | 0              | 0              |             |
| MM050    | 0             | 0              | 0           | 0           | 0            | 0              | 0              |             |
| MM051_1  | 0             | 0              | 0           | 0           | 0            | 0              | 0              |             |
| MM051_2  | 0             | 0              | 0           | 0           | 0            | 0              | 0              |             |
| MM052_1  | 0             | 0              | 0           | 0           | 0            | 0              | 0              |             |
| MM052_2  | 0             | 0              | 0           | 0           | 0            | 0              | 0              |             |
| MM053    | 0             | 0              | 0           | 0           | 0            | 0              | 0              |             |
| MM054    | 0             | 0              | 0           | 0           | 0            | 0              | 0              |             |

## Somatic\_mutation

**Supplementary Table S8. Aminopeptidase gene somatic mutation frequencies from MM patient samples in the FIMM dataset (n=169) (10/12)**

| SampleID | <i>NPEPPS</i> | <i>RNPEPL1</i> | <i>TPP1</i> | <i>TPP2</i> | <i>TRHDE</i> | <i>XPNPEP2</i> | <i>XPNPEP3</i> | Gene symbol |
|----------|---------------|----------------|-------------|-------------|--------------|----------------|----------------|-------------|
| MM056_1  | 0             | 0              | 0           | 0           | 0            | 0              | 0              |             |
| MM056_2  | 0             | 0              | 0           | 0           | 0            | 0              | 0              |             |
| MM057_1  | 0             | 0              | 0           | 0           | 0            | 0              | 0              |             |
| MM057_2  | 0             | 0              | 0           | 0           | 0            | 0              | 0              |             |
| MM057_3  | 0             | 0              | 0           | 0           | 0            | 0              | 0              |             |
| MM057_4  | 0             | 0              | 0           | 0           | 0            | 0              | 0              |             |
| MM057_5  | 0             | 0              | 0           | 0           | 0            | 0              | 0              |             |
| MM057_6  | 0             | 0              | 0           | 0           | 0            | 0              | 0              |             |
| MM058_1  | 0             | 0              | 0           | 0           | 0            | 0              | 0              |             |
| MM058_2  | 0             | 0              | 0           | 0           | 0            | 0              | 0              |             |
| MM059    | 0             | 0              | 0           | 0           | 0            | 0              | 0              |             |
| MM061_1  | 0             | 0              | 0           | 0           | 0            | 0              | 0              |             |
| MM061_2  | 0             | 0              | 0           | 0           | 0            | 0              | 0              |             |
| MM062    | 0             | 0              | 0           | 0           | 0            | 0              | 0              |             |
| MM066    | 0             | 0              | 0           | 0           | 0            | 0              | 0              |             |
| MM067    | 0             | 0              | 0           | 0           | 0            | 0              | 0              |             |
| MM068_1  | 0             | 0              | 0           | 0           | 0            | 0              | 0              |             |
| MM069    | 0             | 0              | 0           | 0           | 0            | 0              | 0              |             |
| MM070    | 0             | 0              | 0           | 0           | 0            | 0              | 0              |             |
| MM071    | 0             | 0              | 0           | 0           | 0            | 0              | 0              |             |
| MM072    | 0             | 0              | 0           | 0           | 0            | 0              | 0              |             |
| MM073    | 0             | 0              | 0           | 0           | 0            | 0              | 0              |             |
| MM074    | 0             | 0              | 0           | 0           | 0            | 0              | 0              |             |
| MM075    | 0             | 0              | 0           | 0           | 0            | 0              | 0              |             |
| MM076    | 0             | 0              | 0           | 0           | 0            | 0              | 0              |             |
| MM079    | 0             | 0              | 0           | 0           | 0            | 0              | 0              |             |
| MM080    | 0             | 0              | 0           | 0           | 0            | 0              | 0              |             |
| MM081    | 0             | 0              | 0           | 0           | 0            | 0              | 0              |             |
| MM082    | 0             | 0              | 0           | 0           | 0            | 0              | 0              |             |
| MM083_1  | 0             | 0              | 0           | 0           | 0            | 0              | 0              |             |
| MM083_2  | 0             | 0              | 0           | 0           | 0            | 0              | 0              |             |
| MM084    | 0             | 0              | 0           | 0           | 0            | 0              | 0              |             |

## Somatic\_mutation

**Supplementary Table S8. Aminopeptidase gene somatic mutation frequencies from MM patient samples in the FIMM dataset ( $n=169$ ) (11/12)**

| SampleID | <i>NPEPPS</i> | <i>RNPEPL1</i> | <i>TPP1</i> | <i>TPP2</i> | <i>TRHDE</i> | <i>XPNPEP2</i> | <i>XPNPEP3</i> | Gene symbol |
|----------|---------------|----------------|-------------|-------------|--------------|----------------|----------------|-------------|
| MM085    | 0             | 0              | 0           | 0           | 0            | 0              | 0              |             |
| MM087    | 0             | 0              | 0           | 0           | 0            | 0              | 0              |             |
| MM088    | 0             | 0              | 0           | 0           | 0            | 0              | 0              |             |
| MM089    | 0             | 0              | 0           | 0           | 0            | 0              | 0              |             |
| MM090    | 0             | 0              | 0           | 0           | 0            | 0              | 0              |             |
| MM091    | 0             | 0              | 0           | 0           | 0            | 0              | 0              |             |
| MM092    | 0             | 0              | 0           | 0           | 0            | 0              | 0              |             |
| MM093    | 0             | 0              | 0           | 0           | 0            | 0              | 0              |             |
| MM094    | 0             | 0              | 0           | 0           | 0            | 0              | 0              |             |
| MM095    | 0             | 0              | 0           | 0           | 0            | 0              | 0              |             |
| MM097    | 0             | 0              | 0           | 0           | 0            | 0              | 0              |             |
| MM099    | 0             | 0              | 0           | 0           | 0            | 0              | 0              |             |
| MM100    | 0             | 0              | 0           | 0           | 0            | 0              | 0              |             |
| MM102    | 0             | 0              | 0           | 0           | 0            | 0              | 0              |             |
| MM105    | 0             | 0              | 0           | 0           | 0            | 0              | 0              |             |
| MM108    | 0             | 0              | 0           | 0           | 0            | 0              | 0              |             |
| MM109    | 0             | 0              | 0           | 0           | 0            | 0              | 0              |             |
| MM110    | 0             | 0              | 0           | 0           | 0            | 0              | 0              |             |
| MM111_1  | 0             | 0              | 0           | 0           | 0            | 0              | 0              |             |
| MM111_2  | 0             | 0              | 0           | 0           | 0            | 0              | 0              |             |
| MM113_1  | 0             | 0              | 0           | 0           | 0            | 0              | 0              |             |
| MM113_2  | 0             | 0              | 0           | 0           | 0            | 0              | 0              |             |
| MM114    | 0             | 0              | 0           | 0           | 0            | 0              | 0              |             |
| MM116    | 0             | 0              | 0           | 0           | 0            | 0              | 0              |             |
| MM117_1  | 0             | 0              | 0           | 0           | 0            | 0              | 0              |             |
| MM117_2  | 0             | 0              | 0           | 0           | 0            | 0              | 0              |             |
| MM118    | 0             | 0              | 0           | 0           | 0            | 0              | 0              |             |
| MM119    | 0             | 0              | 0           | 0           | 0            | 0              | 0              |             |
| MM121    | 0             | 0              | 0           | 0           | 0            | 0              | 0              |             |
| MM123    | 0             | 0              | 0           | 0           | 0            | 0              | 0              |             |
| MM126    | 0             | 0              | 0           | 0           | 0            | 0              | 0              |             |
| MM128_1  | 0             | 0              | 0           | 0           | 0            | 0              | 0              |             |

Somatic\_mutation

**Supplementary Table S8. Aminopeptidase gene somatic mutation frequencies from MM patient samples in the FIMM dataset (n=169) (12/12)**

| SampleID            | <i>NPEPPS</i>    | <i>RNPEPL1</i>  | <i>TPP1</i>       | <i>TPP2</i>   | <i>TRHDE</i>   | <i>XPNPEP2</i>  | <i>XPNPEP3</i>    | Gene symbol |
|---------------------|------------------|-----------------|-------------------|---------------|----------------|-----------------|-------------------|-------------|
| MM129               | 0                | 0               | 0                 | 0             | 0              | 0               | 0                 |             |
| MM130               | 0                | 0               | 0                 | 0             | 0              | 0               | 0                 |             |
| MM131               | 0                | 0               | 0                 | 0             | 0              | 0               | 0                 |             |
| MM132               | 0                | 0               | 0                 | 0             | 0              | 0               | 0                 |             |
| MM133               | 0                | 0               | 0                 | 0             | 0              | 0               | 0                 |             |
| MM134               | 0                | 0               | 0                 | 0             | 0              | 0               | 0                 |             |
| MM136               | 0                | 0               | 0                 | 0             | 0              | 0               | 0                 |             |
| MM138               | 0                | 0               | 0                 | 0             | 0              | 0               | 0                 |             |
| MM140               | 0                | 0               | 0                 | 0             | 0              | 0               | 0                 |             |
| <b>Frequency(%)</b> | <b>2,3668639</b> | <b>1,183432</b> | <b>0,59171598</b> | <b>0,5917</b> | <b>1,18343</b> | <b>1,183432</b> | <b>0,59171598</b> |             |

**Supplementary Table S9. Aminopeptidase gene copy number variation scores from MM patient samples in the FIMM dataset (n = 169). (1/15)**

| SampleID | AMZI    | ANPEP   | LVRN    | BLMH    | AOPEP   | CTSH     | CTSV    | DNPEP   | DPP3    | DPP4    | DPP7    | DPP8    | DPP9    | ENPEP   | ERAP1   | ERAP2   | Gene |
|----------|---------|---------|---------|---------|---------|----------|---------|---------|---------|---------|---------|---------|---------|---------|---------|---------|------|
| MM032_1  | -0.0975 | 0.307   | 0.0338  | 0.0332  | 0.2042  | 0.307    | 0.2042  | -0.1779 | 0.2072  | -0.1779 | 0.2042  | 0.307   | 0.4492  | -0.3369 | 0.0338  | 0.0338  |      |
| MM051_1  | -0.755  | -1.1296 | -0.0794 | 0.067   | -0.0189 | 0.0117   | -0.0189 | -0.0119 | -0.0184 | -0.07   | -0.255  | 0.0216  | -0.0331 | -0.1449 | -0.0794 | -0.0794 |      |
| MM053    | -0.0514 | -1.2361 | 0.5862  | -0.1723 | 0.4213  | 0.3532   | 0.5355  | -0.3912 | 0.354   | 0.032   | 0.0024  | 0.3688  | 0.0805  | 0.1448  | 0.5862  | 0.5862  |      |
| MM056_1  | 0.1455  | 0.5006  | 0.0042  | 0.1582  | 0.1646  | 0.5006   | 0.1646  | -0.3571 | 0.1891  | 0.1666  | 0.1099  | 0.5006  | 0.4936  | -0.3229 | 0.0042  | 0.0042  |      |
| MM062    | 0.0786  | 0.0339  | -0.5005 | 0.0519  | -0.0674 | -0.17955 | -0.0674 | -0.1844 | 0.038   | -0.1857 | 0.0475  | -0.0759 | 0.0705  | -0.3681 | -0.4436 | -0.4436 |      |
| MM063    | 0.0081  | 0.012   | -0.0198 | 0.0444  | 0.0223  | 0.012    | 0.0223  | -0.0184 | 0.0434  | -0.0184 | 0.0223  | -0.0014 | 0.0857  | -0.0444 | -0.0198 | -0.0198 |      |
| MM064    | 0.3701  | 0.459   | 0.232   | -0.0471 | 0.5218  | 0.459    | 0.5218  | -0.1483 | -0.0781 | -0.1483 | 0.5218  | 0.4296  | 0.7849  | -1.0909 | 0.232   | 0.232   |      |
| MM065    | -0.0101 | 0.1105  | -0.0654 | 0.0313  | 0.0778  | 0.1105   | 0.0778  | -0.0343 | 0.0091  | -0.0343 | 0.0778  | 0.1105  | 0.7353  | -0.7433 | -0.0654 | -0.0654 |      |
| MM066    | -0.027  | -0.0156 | -0.065  | 0.0968  | 0.0211  | -0.0156  | 0.0211  | -0.0711 | 0.0492  | -0.0711 | 0.0211  | -0.0156 | 0.2075  | -0.1092 | -0.065  | -0.065  |      |
| MM067    | 0.2429  | 0.2568  | -0.0112 | 0.3744  | 0.7107  | 0.2568   | 0.7107  | -0.2913 | 0.3213  | -0.4561 | 0.7107  | 0.2568  | 0.6302  | -0.5339 | -0.0112 | -0.0112 |      |
| MM069    | 0.1898  | 0.4124  | 0.1396  | -0.097  | 0.2028  | 0.4124   | 0.2028  | -0.1456 | 0.2025  | -0.1456 | 0.2028  | 0.4124  | 0.3396  | -0.1699 | 0.1396  | 0.1396  |      |
| MM070    | 0.2034  | 0.2227  | 0.1852  | 0.2508  | 0.2342  | 0.2227   | 0.2342  | -0.1521 | 0.224   | -0.1521 | 0.2342  | 0.2227  | 0.2909  | -0.1679 | 0.1852  | 0.1852  |      |
| MM072    | -0.0112 | 0.2957  | 0.2322  | 0.3667  | 0.321   | 0.2957   | 0.321   | -0.2604 | 0.3     | -0.2768 | 0.321   | 0.2957  | 0.4684  | -0.3076 | 0.2322  | 0.2322  |      |
| MM074    | 0.0033  | 0.0057  | -0.0659 | -0.4887 | 0.0165  | 0.0057   | 0.0165  | -0.0326 | -0.0049 | -0.0326 | 0.0165  | 0.0057  | 0.1794  | -0.0297 | -0.0659 | -0.0659 |      |
| MM075    | -0.8238 | 0.373   | 0.3051  | -0.0427 | 0.3809  | 0.373    | 0.3809  | -0.1144 | 0.6632  | -0.1144 | 0.3809  | 0.373   | 0.3941  | -0.1393 | 0.3051  | 0.3051  |      |
| MM076    | -0.035  | -0.0533 | -0.072  | -0.0037 | 0.1944  | -0.0533  | 0.1944  | -0.0699 | 0.209   | -0.0699 | 0.1944  | -0.0533 | 0.3156  | -0.1045 | -0.072  | -0.072  |      |
| MM078_1  | -0.0268 | -0.0085 | -0.1099 | 0.0912  | 0.0044  | -0.0085  | 0.0044  | -0.0801 | 0.0186  | -0.0801 | 0.0044  | -0.0085 | 0.5883  | -0.1369 | -0.1099 | -0.1099 |      |
| MM079    | -0.0483 | -0.0466 | 0.3454  | 0.0487  | 0.7421  | -0.0466  | 0.7421  | -0.0936 | 0.4107  | -0.0936 | 0.7421  | -0.0466 | 0.634   | -0.1274 | 0.3454  | 0.3454  |      |
| MM083_1  | 0.001   | 0.0073  | -0.0235 | 0.0845  | 0.0166  | 0.0073   | 0.0166  | -0.0277 | 0.0138  | -0.0277 | 0.0166  | 0.0073  | 0.1676  | -0.052  | -0.0235 | -0.0235 |      |
| MM085    | -0.0682 | 0.2245  | 0.2763  | -0.0839 | 0.2159  | 0.2245   | 0.2159  | -0.0645 | 0.2093  | -0.0645 | 0.1709  | 0.2245  | 0.4283  | -0.0228 | 0.2631  | 0.2631  |      |
| MM086    | 0.0159  | 0.0835  | -0.0333 | 0.1559  | 0.0536  | 0.0835   | 0.0536  | 0.0291  | 0.2094  | -0.1119 | 0.0536  | 0.0147  | 0.9246  | -0.0988 | -0.0333 | -0.0333 |      |
| MM087    | -0.0191 | -0.0248 | -0.078  | 0.0883  | 0.0175  | -0.0248  | 0.0175  | -0.0267 | 0.1553  | -0.1024 | 0.0175  | -0.0248 | 0.6223  | -0.14   | -0.078  | -0.078  |      |
| MM088    | 0.0193  | 0.0123  | -0.011  | 0.0877  | 0.0458  | 0.0123   | 0.0458  | 0.0083  | 0.8516  | -0.0489 | 0.0458  | 0.0123  | 0.2294  | -0.0588 | -0.011  | -0.011  |      |
| MM089    | 0.2046  | -0.0081 | -0.1051 | 0.0811  | 0.0377  | -0.0081  | 0.0377  | -0.0987 | 0.1115  | -0.0987 | 0.0377  | -0.0081 | 0.2776  | -0.1188 | -0.1051 | -0.1051 |      |
| MM090    | -0.0173 | -0.0065 | -0.1677 | 0.118   | 0.0626  | -0.0065  | 0.0626  | -0.0743 | 0.1405  | -0.0743 | 0.0626  | -0.0065 | 0.2254  | -0.1492 | -0.1422 | -0.1422 |      |
| MM093    | 0.2536  | 0.2789  | 0.2178  | 0.0372  | 0.2841  | 0.2714   | 0.2841  | -0.2267 | -0.0358 | -0.2267 | 0.2841  | 0.2714  | 0.47    | -0.205  | 0.2178  | 0.2178  |      |
| MM094    | -0.0705 | 0.7592  | 0.368   | 0.0048  | 0.4254  | 0.7592   | 0.4254  | -0.1292 | 0.4288  | -0.1292 | 0.4254  | 0.7592  | 0.591   | -0.1741 | 0.368   | 0.368   |      |
| MM096    | 0.0025  | -0.0064 | -0.0289 | 0.0447  | -0.0011 | -0.0064  | -0.0011 | -0.0115 | -0.0109 | -0.0497 | -0.0011 | -0.0064 | 0.121   | -0.0339 | -0.0289 | -0.0289 |      |
| MM100    | 0.0156  | -0.0033 | -0.0316 | 0.0957  | 0.4449  | -0.0033  | 0.4449  | -0.051  | 0.0097  | -0.051  | 0.4449  | 0.0097  | 0.2649  | -0.0823 | -0.0316 | -0.0316 |      |
| MM101    | 0.261   | 0.6357  | 0.2479  | -0.1768 | 0.2929  | 0.6357   | 0.2929  | -0.2698 | 0.2984  | -0.2698 | 0.2929  | 0.6357  | 0.4647  | -0.2659 | 0.2396  | 0.2396  |      |
| MM103    | -0.106  | 0.2846  | 0.2489  | -0.0016 | 0.3262  | 0.2846   | 0.3262  | -0.212  | 0.3373  | -0.212  | 0.3262  | 0.2846  | 0.5754  | -0.2107 | 0.2489  | 0.2489  |      |
| MM104    | 0.0118  | -0.0115 | -0.1447 | 0.1188  | -0.0739 | -0.0115  | -0.0739 | -0.0835 | 0.1566  | -0.1654 | 0.0673  | -0.0115 | 0.7673  | -0.1403 | -0.1447 | -0.1447 |      |
| MM105    | -0.0493 | 0.3065  | -0.0816 | 0.0311  | 0.3038  | 0.3065   | 0.3038  | -0.0861 | 0.3034  | -0.1133 | 0.3038  | 0.3065  | 0.4943  | -0.102  | -0.0816 | -0.0816 |      |
| MM108    | -0.0155 | -0.0118 | -0.2104 | 0.0813  | -0.0509 | -0.0118  | -0.0509 | -0.9191 | 0.1614  | -1.0938 | 0.5943  | -0.0118 | 0.3042  | -0.1598 | -0.2104 | -0.2104 |      |
| MM110    | 0.024   | 0.0094  | -0.0318 | 0.0866  | 0.0292  | 0.0094   | 0.0292  | -0.0084 | 0.0193  | -0.0825 | 0.0292  | 0.0094  | 0.2085  | -0.061  | -0.0318 | -0.0318 |      |

**Supplementary Table S9. Aminopeptidase gene copy number variation scores from MM patient samples in the FIMM dataset ( $n = 169$ ). (2/15)**

| SampleID | AMZI    | ANPEP   | LVRN    | BLMH    | AOPEP   | CTSH    | CTSV    | DNPEP   | DPP3    | DPP4    | DPP7    | DPP8    | DPP9    | ENPEP   | ERAP1   | ERAP2   | Gene |
|----------|---------|---------|---------|---------|---------|---------|---------|---------|---------|---------|---------|---------|---------|---------|---------|---------|------|
| MM113_1  | 0.0981  | 0.7424  | 0.2975  | 0.0033  | 0.3898  | 0.7424  | 0.3898  | -0.1844 | 0.719   | -0.1844 | 0.3898  | 0.7424  | 0.6314  | -0.223  | 0.2975  | 0.2975  |      |
| MM114    | 0       | 0       | 0       | 0       | 0       | 0       | 0       | 0       | 0       | 0       | 0       | 0       | 0       | 0       | 0       | 0       |      |
| MM115    | 0       | 0       | 0.1164  | 0       | 0       | 0       | 0       | 0.1257  | 0       | 0.1257  | 0       | 0       | 0       | 0.195   | 0.1164  | 0.1164  |      |
| MM116    | -0.0334 | 0.089   | 0.0282  | 0.1073  | 0.1045  | 0.089   | 0.1045  | -0.0735 | 0.0074  | -0.1381 | 0.1045  | 0.0816  | 0.3998  | -0.1194 | 0.0282  | 0.0282  |      |
| MM117_1  | 0       | 0       | 0       | 0       | 0       | 0       | 0       | 0       | 0       | 0       | 0       | 0       | 0       | 0       | 0       | 0       |      |
| MM118    | 0.2243  | 0.0411  | -0.0863 | 0.0685  | 0.0122  | 0.0411  | 0.0122  | -0.0267 | 0.0394  | -0.131  | 0.0122  | 0.026   | 0.8383  | -0.1058 | -0.0863 | -0.0863 |      |
| MM119    | 0.3004  | 0.0089  | 0.081   | 0.0883  | 0.5814  | 0.0089  | 0.5814  | -0.3463 | -0.3445 | -0.3246 | 0.5814  | 0.0563  | 0.1032  | 0.0715  | 0.081   | 0.081   |      |
| MM120    | 0.2538  | 0.0685  | 0.1844  | -0.0332 | 0.0971  | 0.0685  | 0.0971  | -0.0789 | 0.1897  | -0.0789 | 0.2216  | 0.0685  | 0.1242  | -0.086  | 0.1844  | 0.1844  |      |
| MM121    | 0.0039  | 0.0073  | -0.026  | 0.095   | 0.0288  | 0.0073  | 0.0288  | -0.0447 | 0.0147  | -0.0447 | 0.0288  | 0.0073  | 0.2553  | -0.0487 | -0.026  | -0.026  |      |
| MM122    | -0.0071 | 0.0021  | -0.0366 | 0.0493  | -0.0031 | 0.0021  | -0.0031 | -0.0241 | 0.0126  | -0.0241 | 0.0408  | 0.0021  | 0.1424  | -0.0283 | -0.0366 | -0.0366 |      |
| MM123    | -0.001  | 0.0189  | -0.0487 | 0.1473  | 0.0429  | 0.0132  | 0.0429  | -0.0608 | 0.0314  | -0.0608 | 0.0429  | 0.0132  | 0.3272  | -0.0742 | -0.0487 | -0.0487 |      |
| MM126    | -0.0034 | -0.0086 | -0.0234 | 0.0231  | 0.1372  | -0.0086 | 0.1372  | -0.0251 | 0.0477  | -0.0251 | 0.1372  | -0.0086 | 0.0628  | -0.0258 | -0.0234 | -0.0234 |      |
| MM128_1  | 0.0326  | 0.0372  | -0.0272 | 0.1801  | -1.0037 | 0.0372  | -1.0037 | -0.1478 | 0.0602  | -0.1478 | 0.1604  | 0.0372  | 0.3163  | -0.1022 | -0.0272 | -0.0272 |      |
| MM131    | 0.296   | 0.0064  | -0.19   | 0.1746  | -0.0721 | 0.0064  | -0.0721 | -0.1139 | 0.0161  | -0.1139 | 0.2065  | 0.0064  | 0.366   | -0.1421 | -0.19   | -0.19   |      |
| MM132    | 0.0713  | 0.4834  | -0.1447 | 0.1227  | 0.0002  | 0.4834  | 0.0002  | -0.1767 | 0.4766  | -0.1767 | 0.0002  | 0.4834  | 0.9032  | -0.2075 | -0.1447 | -0.1447 |      |
| MM133    | 0.1662  | 0.2365  | -0.2809 | 0.1107  | -0.0397 | 0.0628  | 0.07895 | -0.0967 | 0.2439  | -0.4032 | 0.1839  | 0.0628  | 0.526   | -0.2891 | -0.2809 | -0.2809 |      |
| MM134    | 0.0411  | -0.005  | -0.184  | 0.0265  | 0.096   | -0.005  | 0.096   | -0.3238 | 0.067   | -0.3238 | 0.096   | -0.0001 | 0.2631  | 0.1852  | -0.184  | -0.184  |      |
| MM136    | 0.2435  | 0.0118  | -0.1013 | 0.1611  | -0.0094 | 0.0118  | -0.0094 | -0.0698 | 0.0175  | -0.1124 | 0.1393  | 0.0118  | 0.3802  | -0.1356 | -0.1013 | -0.1013 |      |
| MM138    | 0.3916  | 0.2632  | -0.2605 | 0.2687  | 0.0012  | 0.0518  | 0.0012  | -0.02   | 0.284   | -0.3427 | 0.1949  | 0.0518  | 0.5482  | -0.2413 | -0.2605 | -0.2605 |      |
| MM139    | 0.4317  | 0.6791  | -0.3402 | 0.3159  | -0.0336 | 0.4896  | -0.0336 | 0.0017  | 0.304   | -0.4317 | 0.2844  | 0.4896  | 0.597   | -0.2695 | -0.9595 | -0.9595 |      |
| MM140    | -0.1009 | -0.0828 | -0.1433 | 0.0374  | 0.2739  | -0.0828 | 0.2739  | -0.0967 | 0.3173  | -0.1961 | 0.3621  | -0.0828 | 0.1595  | 0.1905  | -0.1433 | -0.1433 |      |
| MM013    | 0.0048  | -0.0132 | -0.028  | 0.0542  | 0.0013  | -0.0132 | 0.0013  | -0.041  | 0.0005  | -0.041  | 0.1418  | -0.018  | 0.6527  | -0.0419 | -0.028  | -0.028  |      |
| MM014_3  | 0.587   | 0.3512  | -0.3183 | 0.4584  | 0.2001  | 0.08665 | 0.2001  | -0.3347 | -0.067  | -0.6235 | 0.5491  | 0.1511  | 0.81    | -0.0791 | -0.5559 | -0.5559 |      |
| MM016    | 0.2991  | -0.0105 | -0.1014 | 0.0333  | 0.3452  | -0.0105 | 0.3452  | -0.1162 | -0.0202 | -0.146  | 0.3452  | -0.0816 | 0.473   | -0.1775 | -0.1014 | -0.1014 |      |
| MM017_3  | 0.2179  | 0.4582  | -0.2302 | 0.0239  | 0.3405  | 0.4582  | 0.3405  | -0.1749 | -0.0726 | -0.1749 | 0.5417  | 0.4582  | 0.5601  | -0.4785 | -0.2302 | -0.2302 |      |
| MM020    | 0.0703  | 0.4541  | -0.1035 | -0.0672 | 0.2764  | 0.4541  | 0.2764  | 0.051   | 0.1189  | 0.051   | 0.3367  | 0.4049  | 0.1377  | 0.031   | -0.1035 | -0.1035 |      |
| MM026    | -0.1683 | 0.3882  | 0.3503  | 0.4443  | 0.7514  | 0.3882  | 0.7514  | -0.2091 | 0.4133  | -0.2091 | 0.8412  | 0.3882  | -0.0001 | 0.3137  | 0.3503  | 0.3503  |      |
| MM027    | 0.006   | -0.0029 | -0.0607 | 0.2363  | 0.0909  | -0.0029 | 0.0909  | -0.5181 | 0.0627  | -0.5181 | 0.6311  | -0.0342 | 0.2408  | -0.1225 | -0.0607 | -0.0607 |      |
| MM028    | 0.0001  | 0.0099  | -0.0364 | 0.0743  | 0.0127  | 0.0099  | 0.0127  | -0.086  | 0.0391  | -0.086  | 0.0127  | 0.0099  | 0.1997  | -0.1491 | -0.0364 | -0.0364 |      |
| MM029    | -0.0055 | -0.0142 | -0.0524 | 0.0874  | -0.0094 | -0.0142 | -0.0094 | -0.0412 | 0.0019  | -0.117  | -0.0094 | -0.0142 | 0.2235  | -0.0874 | -0.0524 | -0.0524 |      |
| MM030_1  | -0.1878 | 0.4714  | 0.0967  | 0.1973  | 0.0742  | -0.1721 | 0.0742  | -0.2386 | 0.1878  | 0.2209  | 0.4384  | -0.1721 | 0.4361  | -0.2722 | 0.0967  | 0.0967  |      |
| MM030_2  | -0.1107 | 0.1455  | 0.0176  | 0.1238  | 0.1091  | 0.1455  | 0.1091  | -0.1673 | 0.1082  | 0.1023  | 0.182   | 0.1455  | 0.2979  | -0.1998 | 0.0176  | 0.0176  |      |
| MM031_2  | 0.1396  | 0.0509  | 0.0921  | -0.0348 | 0.0736  | 0.0509  | 0.0153  | 0.0759  | 0.5985  | 0.1736  | 0.1755  | -0.0635 | 0.1122  | -0.0598 | 0.0287  | 0.0287  |      |
| MM032_2  | 0.0435  | 0.2846  | 0.2626  | -0.1495 | 0.1063  | 0.2846  | 0.1063  | -0.1231 | 0.0512  | 0.089   | -0.0652 | 0.2846  | -0.0264 | 0.2611  | 0.2626  | 0.2626  |      |
| MM033_4  | -0.0462 | 0.4365  | -0.8908 | -0.0428 | 0.0174  | 0.4365  | 0.0174  | -0.1052 | -0.0078 | -0.1052 | 0.0174  | 0.4365  | 0.2827  | -0.0593 | -0.8908 | -0.8908 |      |



**Supplementary Table S9. Aminopeptidase gene copy number variation scores from MM patient samples in the FIMM dataset (n = 169). (3/15)**

| SampleID | AMZI    | ANPEP   | LVRN    | BLMH    | AOPEP   | CTSH    | CTSV    | DNPEP   | DPP3    | DPP4    | DPP7    | DPP8    | DPP9    | ENPEP   | ERAP1   | ERAP2   | Gene |
|----------|---------|---------|---------|---------|---------|---------|---------|---------|---------|---------|---------|---------|---------|---------|---------|---------|------|
| MM033_1  | -0.123  | 0.5825  | -0.1065 | -0.0424 | -0.0472 | 0.4368  | -0.0472 | -0.0685 | -0.0508 | -0.0542 | -0.1781 | 0.4588  | 0.3495  | -0.0595 | -0.1065 | -0.1065 |      |
| MM033_2  | -0.0106 | 0.3312  | -0.6202 | -0.0602 | 0.0145  | 0.3312  | 0.0145  | -0.0992 | -0.0277 | 0.0352  | -0.098  | 0.4994  | 0.3055  | 0.1236  | -0.6202 | -0.6202 |      |
| MM033_3  | -0.0338 | 0.5279  | -0.87   | -0.0246 | 0.0255  | 0.5279  | 0.0255  | -0.0307 | -0.021  | -0.0307 | -0.0769 | 0.5279  | 0.304   | 0.0063  | -0.87   | -0.87   |      |
| MM001    | -0.0217 | 0.0484  | 0.0416  | -0.6242 | 0.0363  | 0.0484  | 0.0363  | 0.0344  | 0.0348  | 0.0344  | 0.0363  | 0.0652  | 0.0058  | -0.0443 | 0.0416  | 0.0416  |      |
| MM034_2  | 0.0355  | 0.0255  | -0.0102 | 0.1108  | 0.0335  | 0.0255  | 0.0335  | -0.0578 | 0.0221  | -0.0578 | 0.0335  | 0.0255  | 0.3345  | -0.0739 | -0.0102 | -0.0102 |      |
| MM034_1  | 0.061   | 0.2868  | -0.128  | -0.0828 | 0.0655  | 0.2868  | 0.0655  | -0.1034 | 0.0949  | -0.3068 | 0.3062  | 0.1091  | 0.5217  | -0.38   | -0.128  | -0.128  |      |
| MM035    | 0.0285  | 0.0606  | -0.1661 | 0.1313  | 0.0587  | 0.0186  | 0.0587  | -0.7978 | 0.1551  | -0.1656 | 0.0587  | 0.0186  | 0.2826  | -0.1278 | -0.2842 | -0.2842 |      |
| MM036_1  | -0.0719 | -0.1136 | 0.4098  | -0.0458 | 0.4739  | -0.1136 | 0.4739  | -0.1934 | -0.0925 | -0.1934 | 0.4739  | -0.1136 | 0.7862  | -0.2247 | 0.4098  | 0.4098  |      |
| MM036_2  | 0.0055  | -0.1228 | 0.3928  | -0.0518 | 0.4323  | -0.1228 | 0.4323  | -0.1877 | -0.0878 | -0.1877 | 0.5286  | -0.1228 | 0.7461  | -0.1171 | 0.3928  | 0.3928  |      |
| MM037    | -0.046  | -0.6352 | -0.0706 | 0.1053  | 0.5103  | -0.6352 | 0.5103  | -0.0637 | 0.0318  | -0.0637 | 0.5103  | 0.0216  | 0.2159  | -0.0893 | -0.0706 | -0.0706 |      |
| MM038    | 0.6036  | -0.0447 | 0.1001  | 0.0569  | 0.3096  | -0.0447 | 0.3096  | -0.1153 | 0.1958  | -0.3864 | 0.7198  | -0.0447 | 0.7074  | -0.2212 | 0.1001  | 0.1001  |      |
| MM039    | -0.1134 | 0.4981  | -0.1896 | 0.1066  | 0.3798  | 0.4981  | 0.3798  | -0.1734 | 0.5603  | -0.1734 | 0.5703  | 0.4981  | 0.7335  | -0.2097 | -0.1896 | -0.1896 |      |
| MM040    | 0.1198  | -0.0015 | -0.0369 | 0.0802  | 0.0116  | -0.0015 | 0.0116  | -0.0308 | 0.0058  | -0.0308 | 0.0116  | -0.0015 | 0.116   | -0.0688 | -0.0369 | -0.0369 |      |
| MM041    | -0.0064 | 0.0137  | -0.2723 | -0.0139 | 0.0032  | 0.0137  | 0.0032  | -0.0462 | 0.0561  | -0.1536 | 0.0909  | 0.0029  | 0.2388  | -0.1506 | -0.2723 | -0.2723 |      |
| MM042    | 0.00665 | 0.3617  | 0.3162  | 0.4542  | 0.2812  | 0.3617  | 0.2812  | -0.1437 | -0.0541 | -0.1437 | 0.1048  | 0.1767  | 0.3924  | -0.1784 | 0.3162  | 0.3162  |      |
| MM043_1  | -0.0154 | -0.0027 | -0.0082 | -0.0512 | -0.003  | -0.0027 | -0.003  | -0.017  | -0.0012 | -0.0174 | -0.003  | -0.0027 | 0.1041  | -0.0175 | -0.0082 | -0.0082 |      |
| MM043_2  | 0.1766  | 0.0522  | 0.2132  | 0.1631  | 0.1257  | 0.0522  | 0.1257  | 0.2436  | -0.0559 | 0.295   | -0.1284 | 0.1239  | -0.0564 | -0.002  | 0.4691  | 0.4691  |      |
| MM044    | -0.0001 | 0.079   | 0.005   | 0.0305  | 0.0294  | 0.079   | 0.0294  | -0.0259 | 0.0132  | -0.0259 | 0.0937  | 0.079   | 0.3262  | -0.0436 | 0.005   | 0.005   |      |
| MM045    | 0.2035  | 0.3384  | 0.0194  | 0.0733  | 0.1486  | 0.3384  | 0.1486  | 0.0114  | 0.2401  | -0.0168 | 0.1486  | 0.3384  | 0.2831  | -0.0367 | 0.0194  | 0.0194  |      |
| MM046_1  | 0.0343  | 0.0072  | 0.0223  | -0.0231 | 0.0177  | 0.0072  | 0.0177  | 0.0302  | -0.0032 | 0.0302  | -0.0416 | 0.0072  | -0.0219 | 0.0505  | 0.0223  | 0.0223  |      |
| MM046_2  | 0.0343  | 0.0072  | 0.0223  | -0.0231 | 0.0177  | 0.0072  | 0.0177  | 0.0302  | -0.0032 | 0.0302  | -0.0416 | 0.0072  | -0.0219 | 0.0505  | 0.0223  | 0.0223  |      |
| MM047    | 0.2159  | 0.409   | 0.3283  | 0.3415  | 0.4747  | 0.409   | 0.4747  | -0.155  | 0.7073  | -0.155  | 0.4747  | 0.3729  | 0.562   | -0.1992 | 0.3283  | 0.3283  |      |
| MM048_1  | -0.1054 | 0.3767  | 0.2144  | -0.0583 | 0.4     | 0.3767  | 0.4     | -0.129  | 0.3709  | -0.129  | 0.4     | 0.3767  | 0.4753  | -0.1335 | 0.2144  | 0.2144  |      |
| MM048_2  | -0.0972 | 0.4303  | 0.1494  | -0.0993 | 0.5008  | 0.3866  | 0.5008  | -0.0892 | 0.4026  | 0.1149  | 0.5324  | 0.4102  | 0.471   | -0.0738 | 0.4845  | 0.4845  |      |
| MM049    | 0.5797  | 0.7937  | 0.262   | -0.0065 | 0.4342  | 0.7937  | 0.4342  | -0.2552 | 0.8338  | -0.2858 | 0.4342  | 0.7859  | 0.7398  | -0.2958 | 0.262   | 0.262   |      |
| MM050    | -0.6249 | 0.0393  | 0.0091  | 0.0638  | 0.0481  | 0.0393  | 0.0481  | -0.7303 | 0.0442  | -0.7303 | 0.0481  | 0.0119  | 0.0966  | -0.0059 | 0.0091  | 0.0091  |      |
| MM051_2  | 0.0548  | 0.0481  | 0.0701  | 0.1284  | 0.1139  | -0.0467 | 0.055   | -0.0637 | 0.0022  | 0.1258  | 0.1099  | 0.0694  | 0.1663  | 0.0119  | 0.0387  | 0.0387  |      |
| MM052_1  | -0.0551 | -0.0188 | -0.0898 | 0.0587  | -0.0383 | -0.0188 | -0.0383 | -0.0594 | 0.1243  | -0.1132 | -0.0111 | -0.0188 | 0.1574  | -0.1046 | -0.0898 | -0.0898 |      |
| MM052_2  | -2.5977 | -0.1548 | 0.023   | -0.1583 | -0.0953 | -0.1548 | -0.0953 | -0.217  | -0.5225 | 0.0422  | -1.3281 | -0.1192 | -0.6232 | 0.0404  | 0.023   | 0.023   |      |
| MM054    | -0.7092 | 0.2638  | -0.0781 | 0.1634  | -0.0639 | 0.2638  | -0.0639 | -0.0144 | 0.199   | -0.1767 | 0.2446  | 0.2638  | 0.5405  | -0.141  | -0.0781 | -0.0781 |      |
| MM055    | 0.4468  | 0.3237  | 0.204   | -0.5385 | 0.2929  | 0.3237  | 0.2929  | -0.1592 | 0.3079  | -0.1592 | 0.3789  | 0.3054  | 0.6352  | -0.2178 | 0.204   | 0.204   |      |
| MM056_2  | 0.237   | 0.6464  | 0.2105  | -0.1695 | 0.259   | 0.6464  | 0.259   | 0.0069  | 0.2867  | 0.0069  | 0.1337  | 0.6464  | 0.1404  | -0.2136 | 0.2105  | 0.2105  |      |
| MM057_4  | -0.0988 | 0.3765  | 0.0727  | 0.1959  | 0.4185  | 0.3765  | 0.4185  | -0.1372 | 0.4527  | -0.1372 | 0.4185  | 0.3765  | 0.0744  | -0.1745 | 0.0727  | 0.0727  |      |
| MM057_5  | 0.0036  | 0.0119  | -0.0345 | 0.0594  | 0.0081  | 0.0119  | 0.0081  | -0.0396 | 0.5647  | -0.0396 | 0.0081  | -0.0793 | 0.1709  | -0.0811 | -0.0345 | -0.0345 |      |
| MM057_6  | -0.0224 | -0.0642 | -0.0516 | 0.0485  | -0.0911 | -0.0642 | -0.0911 | -0.0568 | 0.5786  | -0.0568 | 0.0542  | -0.0642 | 0.1673  | -0.088  | -0.0516 | -0.0516 |      |

**Supplementary Table S9. Aminopeptidase gene copy number variation scores from MM patient samples in the FIMM dataset (n = 169). (4/15)**

| SampleID | AMZI    | ANPEP   | LVRN    | BLMH    | AOPEP   | CTSH    | CTSV    | DNPEP   | DPP3    | DPP4    | DPP7    | DPP8    | DPP9    | ENPEP   | ERAP1   | ERAP2   | Gene |
|----------|---------|---------|---------|---------|---------|---------|---------|---------|---------|---------|---------|---------|---------|---------|---------|---------|------|
| MM057_1  | -0.0375 | 0.0112  | -0.014  | 0.0313  | 0.022   | 0.0112  | 0.022   | -0.0717 | 0.5189  | -0.0717 | 0.022   | 0.0112  | 0.1452  | -0.1145 | -0.014  | -0.014  |      |
| MM057_2  | -0.0263 | -0.0113 | -0.0569 | 0.0808  | 0.0343  | -0.0113 | 0.0343  | -0.0825 | 0.0728  | -0.0825 | 0.0343  | -0.0113 | 0.1843  | -0.1156 | -0.0569 | -0.0569 |      |
| MM057_3  | -0.0982 | 0.3885  | 0.3525  | -0.0114 | 0.4612  | 0.3885  | 0.4612  | -0.1648 | 0.5219  | -0.1648 | 0.4612  | 0.3885  | 0.3634  | -0.2286 | 0.3525  | 0.3525  |      |
| MM058_1  | 0.154   | 0.0781  | -0.1123 | 0.1417  | 0.1054  | 0.0781  | 0.1054  | 0.0464  | 0.0919  | 0.0464  | 0.1054  | 0.0781  | 0.2239  | -0.0578 | -0.1123 | -0.1123 |      |
| MM058_2  | 1.647   | 0.3232  | -0.306  | 0.6695  | -0.1448 | 0.3232  | -0.1448 | -0.3445 | 0.9038  | -0.3445 | 1.7234  | -0.0781 | 2.1462  | -0.9946 | -0.306  | -0.306  |      |
| MM059    | -0.0267 | -0.0169 | -0.0529 | 0.1338  | 0.0511  | -0.0169 | 0.0511  | -0.0618 | 0.134   | -0.0618 | 0.0511  | -0.0169 | 0.2991  | -0.1404 | -0.0529 | -0.0529 |      |
| MM060    | 0.2691  | -0.0175 | -0.1357 | 0.1318  | -0.097  | -0.0175 | -0.097  | -0.2249 | 0.0789  | -0.1772 | 0.4673  | -0.0175 | 0.8746  | -0.0089 | -0.1357 | -0.1357 |      |
| MM061_1  | -0.0125 | 0.0008  | -0.0279 | 0.1149  | -0.0124 | 0.0008  | -0.0124 | -0.0353 | -0.0096 | -0.0353 | -0.0124 | 0.0008  | 0.5168  | -0.0371 | -0.0279 | -0.0279 |      |
| MM061_2  | -0.0278 | -0.0008 | -0.0331 | 0.0611  | -0.0034 | -0.0008 | -0.0034 | -0.0222 | -0.018  | -0.0307 | -0.0034 | -0.0008 | 0.5917  | -0.022  | -0.0331 | -0.0331 |      |
| MM068_1  | 0.0054  | -0.6066 | -0.0157 | 0.0777  | 0.0314  | 0.0184  | 0.0314  | -0.0195 | 0.2311  | -0.0195 | 0.0314  | 0.0184  | 0.1328  | -0.0449 | -0.0157 | -0.0157 |      |
| MM068_2  | -0.1714 | -0.3069 | -0.2202 | 0.3978  | 0.2082  | -0.3069 | 0.2082  | -0.3739 | 0.9251  | -0.3739 | 0.2082  | -0.3069 | 0.9125  | -0.748  | -0.2202 | -0.2202 |      |
| MM071    | 0.6165  | 0.6     | -0.2244 | -0.0288 | 0.3244  | 0.6     | 0.3244  | -0.319  | 0.5397  | -0.319  | -0.0545 | 0.6     | 0.7728  | -0.3458 | -0.2244 | -0.2244 |      |
| MM073    | 0.4564  | 0.4311  | 0.2984  | -0.0769 | 0.7192  | 0.4311  | 0.7192  | -0.1004 | 0.4375  | -0.1961 | 0.7192  | 0.4311  | 0.4495  | -0.1392 | 0.2984  | 0.2984  |      |
| MM077    | -0.0041 | -0.0446 | -0.2773 | 0.0525  | 0.5312  | -0.0446 | 0.5312  | -0.2574 | -0.0001 | -0.2574 | 0.5312  | -0.0446 | 0.0943  | 0.1157  | -0.1914 | -0.1914 |      |
| MM078_2  | 0.0104  | -0.001  | -0.0397 | 0.1041  | 0.0182  | -0.001  | 0.0182  | -0.0088 | 0.0073  | -0.0826 | 0.0182  | -0.001  | 0.7387  | -0.0819 | -0.0397 | -0.0397 |      |
| MM080    | 0.0598  | -0.7869 | -0.0654 | 0.073   | 0.4599  | -0.7869 | 0.4599  | -0.0957 | 0.0121  | -0.0957 | 0.5644  | 0.0348  | 0.204   | -0.1019 | -0.0654 | -0.0654 |      |
| MM081    | 0.4436  | 0.09    | -0.1872 | 0.2911  | -0.03   | 0.1025  | -0.03   | 0.0993  | 0.2884  | -0.3186 | 0.2265  | 0.1025  | 0.6829  | -0.2404 | -0.1872 | -0.1872 |      |
| MM082    | 0.5554  | 0.8231  | 0.3097  | -0.0287 | 0.4523  | 0.8231  | 0.4523  | -0.2364 | 0.4558  | -0.2364 | 0.4523  | 0.8208  | 0.6772  | -0.2629 | 0.3097  | 0.3097  |      |
| MM083_2  | -0.0183 | 0.0205  | -0.0274 | 0.0704  | 0.0287  | 0.0205  | 0.0287  | -0.0099 | 0.0243  | -0.06   | 0.0287  | 0.0205  | 0.1651  | -0.0461 | -0.0274 | -0.0274 |      |
| MM084    | 0.371   | 0.3773  | 0.3621  | -0.1303 | 0.3821  | 0.3773  | 0.3821  | -0.172  | 0.374   | -0.172  | 0.3821  | 0.3773  | 0.4714  | -0.1637 | 0.3621  | 0.3621  |      |
| MM091    | -0.0872 | 0.3971  | 0.2523  | 0.0161  | 0.4196  | 0.3971  | 0.4196  | -0.1797 | 0.3977  | -0.1797 | 0.4196  | 0.3971  | 1.0537  | -0.2703 | 0.2523  | 0.2523  |      |
| MM092    | -0.0116 | -0.0037 | -0.1218 | 0.0474  | 0.0027  | -0.0037 | 0.0027  | -0.0364 | 0.0018  | -0.0364 | 0.0027  | -0.0037 | 0.1237  | -0.0648 | -0.1218 | -0.1218 |      |
| MM095    | 0.0085  | -0.022  | -0.1058 | 0.0608  | -0.0408 | -0.022  | -0.0408 | -0.0984 | 0.026   | -0.1312 | 0.0986  | -0.022  | 0.2101  | -0.1701 | -0.1058 | -0.1058 |      |
| MM097    | -0.0008 | 0.0881  | -0.1391 | 0.1246  | 0.0058  | 0.0881  | 0.0058  | -0.1512 | 0.2706  | -0.1512 | 0.0553  | 0.1513  | 0.397   | -0.1127 | -0.1391 | -0.1391 |      |
| MM098    | 0.0517  | -0.518  | 0.06    | -0.121  | 0.0055  | -0.518  | 0.0055  | 0.1179  | 0.0083  | 0.1179  | 0.0055  | -0.518  | -0.7449 | 0.2239  | 0.1084  | 0.1084  |      |
| MM099    | -0.0342 | 0.2767  | -0.1354 | 0.1549  | -0.1356 | 0.3118  | -0.1356 | 0.0199  | 0.0756  | -1.0329 | 0.4046  | 0.239   | 0.3856  | -0.2773 | -0.1354 | -0.1354 |      |
| MM102    | -0.0267 | 0.0001  | 0.0038  | 0.1086  | 0.0659  | 0.0001  | 0.0659  | -0.0739 | 0.0005  | -0.0739 | 0.0659  | 0.0001  | 0.2785  | -0.0949 | 0.0038  | 0.0038  |      |
| MM107    | 0.7082  | 0.3836  | -0.1428 | -0.7017 | 0.3189  | 0.3836  | 0.3189  | -0.1093 | 0.1213  | -0.1604 | 0.3517  | 0.3836  | 0.603   | -0.696  | -0.1428 | -0.1428 |      |
| MM109    | 0.0047  | -0.0146 | 0.008   | 0.0322  | 0.0013  | 0.0128  | 0.0013  | -0.0087 | -0.0021 | -0.0087 | 0.0013  | 0.0128  | 0.6261  | 0.0076  | 0.008   | 0.008   |      |
| MM111_1  | -0.0691 | -0.0184 | -0.0898 | 0.1735  | 0.553   | -0.0184 | 0.553   | -0.0706 | -0.0139 | -0.1361 | 0.553   | -0.0184 | 0.264   | -0.1543 | -0.0898 | -0.0898 |      |
| MM111_2  | -0.0505 | -0.0148 | -0.0963 | 0.1125  | 0.578   | -0.0148 | 0.578   | -0.1379 | 0.0507  | -0.1494 | 0.578   | -0.0148 | 0.9123  | -0.1582 | -0.1797 | -0.1797 |      |
| MM002_1  | -0.1335 | 0.6257  | 0.2811  | -0.0595 | 0.6871  | 0.6257  | 0.6871  | -0.2203 | 1.264   | -0.2203 | 0.6871  | 0.6257  | 0.6017  | -0.318  | 0.0575  | 0.0575  |      |
| MM002_2  | -0.1495 | 0.6647  | 0.2746  | -0.0312 | 0.701   | 0.6647  | 0.701   | -0.1203 | 0.712   | -0.2664 | 0.701   | 0.6647  | 0.6686  | -0.2639 | 0.2746  | 0.2746  |      |
| MM002_3  | -0.1329 | 0.6875  | 0.2698  | -0.0464 | 0.7223  | 0.6875  | 0.7223  | -0.1902 | 0.7139  | -0.1902 | 0.7223  | 0.6875  | 0.6126  | -0.243  | 0.2698  | 0.2698  |      |
| MM113_2  | 0.2578  | 0.0265  | -0.0798 | 0.154   | 0.0744  | 0.0226  | 0.0744  | -0.1065 | 0.0556  | -0.1065 | 0.0744  | 0.0226  | 0.3615  | -0.1403 | -0.0798 | -0.0798 |      |

**Supplementary Table S9. Aminopeptidase gene copy number variation scores from MM patient samples in the FIMM dataset (*n* = 169). (5/15)**

| SampleID | AMZI    | ANPEP   | LVRN    | BLMH    | AOPEP   | CTSH    | CTSV    | DNPEP   | DPP3    | DPP4    | DPP7    | DPP8    | DPP9   | ENPEP   | ERAP1   | ERAP2   | Gene |
|----------|---------|---------|---------|---------|---------|---------|---------|---------|---------|---------|---------|---------|--------|---------|---------|---------|------|
| MM003    | 0.7325  | 0.3259  | 0.113   | 0.4541  | 0.2261  | 0.3259  | 0.2124  | -0.2642 | 0.1189  | -0.3592 | 0.537   | 0.2865  | 1.0219 | -0.4426 | 0.113   | 0.113   |      |
| MM004    | 0.0545  | 0.0488  | -0.0433 | 0.0807  | 0.1456  | 0.0488  | 0.1456  | -0.0862 | 0.1088  | -0.0862 | 0.1456  | 0.0488  | 0.3105 | -0.1081 | -0.0433 | -0.0433 |      |
| MM117_2  | 0.2983  | 0.5416  | -0.138  | 0.1501  | -0.079  | 0.5416  | -0.079  | -0.1525 | 0.0312  | -0.1525 | 0.338   | 0.5381  | 1.1529 | -0.2013 | -0.138  | -0.138  |      |
| MM124    | -0.1004 | -0.0278 | -0.1013 | 0.1136  | 0.5313  | -0.0278 | 0.5313  | -0.0524 | -0.0232 | -0.1745 | 0.5313  | -0.0278 | 0.2848 | -0.1731 | -0.1013 | -0.1013 |      |
| MM129    | 0.2413  | 0.2802  | -0.3826 | 0.2733  | -0.239  | 0.0842  | -0.239  | 0.0811  | 0.2177  | -0.5826 | 0.6214  | 0.0842  | 0.8996 | -0.6332 | -0.3826 | -0.3826 |      |
| MM130    | -0.0141 | 0.0058  | -0.0444 | 0.0949  | 0.0544  | 0.0194  | 0.0544  | -0.0683 | 0.0142  | -0.0683 | 0.0544  | 0.0194  | 0.2188 | -0.0707 | -0.0444 | -0.0444 |      |
| MM005    | 0.5201  | -0.2629 | -0.3231 | 0.1038  | -0.1704 | 0.6209  | -0.1704 | -0.4598 | 0.041   | -0.4598 | -0.1704 | 0.6209  | 0.2454 | -0.3131 | -0.3231 | -0.3231 |      |
| MM135    | 0.0441  | 0.9663  | -0.1464 | 0.0546  | -0.0306 | -0.0671 | -0.0306 | -0.1957 | 0.6273  | -0.1957 | -0.0306 | 0.5086  | 0.7857 | -0.0031 | -0.1464 | -0.1464 |      |
| MM137    | 0.1897  | 0.5823  | -0.4066 | 0.073   | -0.2023 | 0.4094  | -0.2023 | -0.1328 | 0.644   | -0.4491 | 0.0065  | 0.4094  | 0.8695 | 0.0795  | -0.4066 | -0.4066 |      |
| MM006    | 0.0227  | 0.0367  | -0.0818 | -0.7718 | -0.0019 | 0.0367  | 0.0816  | -0.0406 | 0.0466  | -0.0406 | 0.0816  | 0.0367  | 0.2693 | -0.0407 | -0.0818 | -0.0818 |      |
| MM007    | -0.0148 | 0.6164  | -0.1097 | 0.0697  | -0.0157 | -0.0153 | -0.0157 | -0.0198 | 0.0774  | -0.1074 | 0.024   | -0.0153 | 0.1767 | -0.0999 | -0.1097 | -0.1097 |      |
| MM008    | -0.0101 | 0.0084  | -0.0956 | 0.1298  | 0.0238  | 0.0084  | 0.0238  | -0.0666 | 0.0544  | -0.0666 | 0.0238  | 0.0084  | 0.3049 | -0.0856 | -0.0956 | -0.0956 |      |
| MM009    | 0.1082  | 0.1353  | 0.0978  | -0.0124 | 0.0986  | 0.1353  | 0.0986  | -0.0821 | 0.2385  | -0.0307 | 0.0986  | 0.1795  | 0.1303 | -0.0159 | 0.0978  | 0.0978  |      |
| MM010    | -0.0482 | 0.039   | 0.2058  | -0.007  | 0.4841  | 0.039   | 0.4841  | -0.0936 | 0.4945  | -0.0936 | 0.4841  | 0.039   | 0.5433 | -0.2165 | 0.2058  | 0.2058  |      |
| MM011    | 0.0305  | 0.0471  | -0.0283 | 0.1487  | 0.0461  | 0.0471  | 0.0461  | -0.4058 | 0.0917  | -0.4058 | 0.0461  | 0.0471  | 0.318  | -0.5049 | -0.0283 | -0.0283 |      |
| MM014_4  | 0.16    | 0.3813  | -0.1038 | 0.3585  | 0.3217  | 0.2807  | 0.3217  | -0.0909 | -0.1597 | -0.079  | 0.2538  | 0.3237  | 0.2982 | 0.1093  | -0.1038 | -0.1038 |      |
| MM014_1  | 0.243   | 0.2847  | -0.1078 | 0.3564  | 0.3272  | 0.2452  | 0.3272  | -0.1873 | -0.0748 | 0.0184  | 0.3272  | 0.2017  | 0.4229 | 0.1718  | -0.1482 | -0.1482 |      |
| MM014_2  | 0.1415  | 0.3019  | -0.2341 | 0.3612  | 0.3553  | 0.3019  | 0.3553  | -0.1372 | -0.1333 | -0.2489 | 0.3553  | 0.3019  | 0.4583 | 0.1961  | -0.2341 | -0.2341 |      |
| MM015    | -0.0549 | 0.0492  | -0.0672 | 0.1908  | 0.05    | 0.0492  | 0.05    | -0.0965 | 0.0318  | -0.0965 | 0.05    | 0.0492  | 0.3948 | -0.1712 | -0.0672 | -0.0672 |      |
| MM017_1  | -0.0455 | 0.3831  | 0.3532  | -0.0548 | 0.3842  | 0.3831  | 0.3842  | -0.1347 | -0.0685 | -0.1347 | 0.3842  | 0.3831  | 0.4671 | -0.1565 | 0.3532  | 0.3532  |      |
| MM019    | 0.4115  | 0.6856  | -0.1743 | -0.0446 | 0.3691  | 0.6856  | 0.3691  | -0.1561 | 0.6929  | -0.1561 | 0.3691  | 0.6856  | 0.4928 | -0.1725 | -0.1743 | -0.1743 |      |
| MM022_1  | -0.045  | -0.0158 | -0.0259 | 0.0089  | 0.4026  | -0.0158 | 0.4026  | -0.0362 | -0.045  | -0.0362 | 0.3861  | -0.0158 | 0.0452 | -0.0233 | -0.0259 | -0.0259 |      |
| MM022_2  | 0.1465  | 0.0207  | 0.0586  | 0.0463  | 0.5682  | -0.0802 | 0.5059  | -0.0107 | 0.0851  | 0.1741  | 0.757   | -0.022  | 0.1395 | -0.0041 | 0.0133  | 0.0133  |      |
| MM022_3  | 0.1659  | -0.0107 | 0.0248  | 0.017   | 0.5891  | -0.0436 | 0.465   | 0.0182  | 0.1436  | 0.1648  | 0.8057  | -0.0354 | 0.2289 | -0.0247 | 0.0248  | 0.0248  |      |
| MM023    | -0.1025 | 0.3982  | 0.362   | -0.0587 | 0.3896  | 0.3982  | 0.3896  | -0.1066 | 0.4066  | -0.1066 | 0.3896  | 0.3982  | 0.4053 | -0.1316 | 0.362   | 0.362   |      |
| MM024    | -0.2619 | 0.2606  | 0.2022  | 0.0255  | 0.4131  | 0.2606  | 0.4131  | -0.2247 | 0.4985  | -0.3923 | 0.4131  | 0.2606  | 0.6312 | -0.0266 | 0.2022  | 0.2022  |      |
| MM025_1  | 0.188   | 0.4527  | 0.363   | 0.0909  | 0.493   | 0.4527  | 0.493   | -0.0344 | 0.8606  | -0.2277 | 0.493   | 0.4381  | 0.7752 | -0.263  | 0.363   | 0.363   |      |
| MM025_2  | 0.5189  | 0.5019  | -0.4055 | 0.2049  | -0.0786 | 0.5776  | -0.0786 | -0.1498 | 1.2452  | -0.4147 | 0.9348  | 0.49    | 1.2281 | -0.3619 | -0.4055 | -0.4055 |      |
| MM017_2  | 0.179   | 0.3687  | 0.2884  | -0.0313 | 0.2823  | 0.3687  | 0.2823  | -0.1541 | 0.0154  | -0.1861 | 0.5636  | 0.3244  | 0.5963 | -0.1914 | 0.2884  | 0.2884  |      |

**Supplementary Table S9. Aminopeptidase gene copy number variation scores from MM patient samples in the FIMM dataset (n = 169). (6/15)**

| SampleID | <i>F11</i> | <i>JMJD7</i> | <i>KDM8</i> | <i>LAP3</i> | <i>LNPEP</i> | <i>LTA4H</i> | <i>METAP1</i> | <i>METAP1D</i> | <i>METAP2</i> | <i>MMP14</i> | <i>NAALADL1</i> | <i>NPEPL1</i> | <i>NPEPPS</i> | <i>PEPD</i> | <i>PGPEP1</i> | Gene |
|----------|------------|--------------|-------------|-------------|--------------|--------------|---------------|----------------|---------------|--------------|-----------------|---------------|---------------|-------------|---------------|------|
| MM032_1  | -0.3369    | 0.307        | 0.0559      | -0.3369     | 0.0338       | -0.1106      | -0.3369       | -0.1779        | -0.1106       | -0.09        | 0.2072          | 0.0531        | 0.0684        | 0.4492      | 0.4492        |      |
| MM051_1  | -0.1449    | -0.0274      | -0.0228     | -0.0901     | -0.0794      | 0.0134       | -0.1449       | -0.1014        | 0.0134        | -0.0814      | -0.0184         | 0.1072        | 0.045         | 0.0463      | -0.0331       |      |
| MM053    | 0.1448     | 0.4823       | -0.284      | 0.1403      | 0.5862       | -0.0209      | 0.1448        | 0.1065         | -0.0209       | -0.0794      | 0.354           | -0.1825       | -0.2034       | 0.1773      | 0.0805        |      |
| MM056_1  | -0.3045    | 0.5006       | -0.325      | -0.2914     | 0.0042       | -0.307       | -0.3229       | 0.1666         | -0.307        | -0.3148      | 0.1891          | -0.3378       | 0.1582        | 0.4936      | 0.4936        |      |
| MM062    | -0.3159    | -0.0631      | 0.1158      | 0.0938      | -0.4436      | -0.3435      | -0.327        | -0.1857        | -0.3435       | -0.0176      | 0.038           | 0.0501        | 0.0648        | 0.0705      | 0.0705        |      |
| MM063    | -0.0444    | -0.0014      | 0.2443      | -0.0444     | -0.0198      | -0.0012      | -0.0444       | -0.0184        | -0.0012       | -0.765       | 0.0434          | 0.0339        | 0.0444        | 0.0857      | 0.0857        |      |
| MM064    | -0.1641    | 0.4296       | -0.0036     | -0.88       | 0.232        | -0.0848      | -1.0909       | -0.1483        | -0.0848       | 0.4262       | -0.0781         | -0.0305       | -0.0141       | 0.0373      | 0.7849        |      |
| MM065    | -0.7433    | 0.1105       | 0.0755      | -0.7058     | -0.0654      | -0.0156      | -0.7551       | -0.0343        | -0.0156       | -0.0093      | 0.0091          | 0.003         | 0.0313        | 0.0839      | 0.7353        |      |
| MM066    | -0.1092    | -0.0156      | 0.1427      | -0.1092     | -0.065       | -0.0168      | -0.1092       | -0.0711        | -0.0168       | -0.0048      | 0.0492          | 0.2483        | 0.0968        | 0.2075      | 0.2075        |      |
| MM067    | -0.5       | 0.2568       | -0.0687     | -0.3379     | -0.0112      | -0.3408      | -0.5339       | -0.4561        | -0.3408       | 0.1994       | 0.3213          | -0.1512       | 0.368         | 0.6302      | 0.6302        |      |
| MM069    | -0.1699    | 0.4124       | 0.0011      | -0.1699     | 0.1396       | -0.0982      | -0.1699       | -0.1456        | -0.0982       | -0.2709      | 0.2025          | -0.0471       | -0.097        | 0.3396      | 0.3396        |      |
| MM070    | -0.1679    | 0.2227       | -0.0837     | -0.1679     | 0.1852       | -0.1193      | -0.1679       | -0.1521        | -0.1193       | -0.1238      | 0.224           | -0.0961       | 0.2508        | 0.2909      | 0.2909        |      |
| MM072    | -0.3076    | 0.2574       | -0.0852     | -0.3076     | 0.2322       | 0.2103       | -0.3076       | -0.2604        | 0.2103        | -0.2542      | 0.3             | -0.1608       | 0.3314        | 0.4684      | 0.4684        |      |
| MM074    | -0.0413    | 0.0057       | 0.0769      | -0.0297     | -0.0659      | 0.0407       | -0.0297       | -0.0326        | 0.0407        | 0.0164       | -0.0049         | -0.0102       | 0.0821        | 0.1239      | 0.1239        |      |
| MM075    | -0.156     | 0.3682       | -0.0464     | -0.1393     | 0.3051       | -0.1014      | -0.1393       | -0.1144        | -0.1014       | -0.0879      | 0.6632          | -0.1768       | -0.0427       | 0.4178      | 0.3941        |      |
| MM076    | -0.1045    | -0.0533      | 0.0006      | -0.0684     | -0.072       | -0.0294      | -0.1045       | -0.0699        | -0.0294       | -0.0444      | 0.209           | -0.0378       | 0.0076        | 0.2824      | 0.3156        |      |
| MM078_1  | -0.1283    | -0.0085      | 0.1011      | -0.0817     | -0.1099      | 0.009        | -0.1369       | -0.0801        | 0.009         | -0.0264      | 0.0186          | 0.0377        | 0.0912        | 0.1703      | 0.1703        |      |
| MM079    | -0.1274    | -0.0466      | 0.5534      | -0.1274     | 0.3454       | -0.0405      | -0.1274       | -0.0936        | -0.0405       | -0.0492      | 0.4107          | -0.0079       | 0.0487        | 0.5782      | 0.5782        |      |
| MM083_1  | -0.052     | 0.0003       | 0.0778      | -0.052      | -0.0235      | 0.0026       | -0.052        | -0.0277        | 0.0026        | -0.0064      | 0.0138          | 0.0184        | 0.0845        | 0.1676      | 0.1676        |      |
| MM085    | -0.0228    | 0.2245       | -0.1028     | -0.0704     | 0.2631       | -0.0786      | -0.0228       | -0.0645        | -0.0786       | -0.0508      | 0.2093          | -0.1097       | -0.0839       | 0.4283      | 0.4283        |      |
| MM086    | -0.0972    | 0.0147       | 0.1977      | -0.0988     | -0.0333      | 0.0812       | -0.0988       | -0.1119        | 0.0812        | 0.0682       | 0.2094          | 0.0983        | 0.1831        | 0.1849      | 0.1849        |      |
| MM087    | -0.0629    | -0.0248      | 0.1006      | -0.0618     | -0.078       | -0.0119      | -0.1341       | -0.1024        | -0.0119       | -0.0148      | 0.0119          | 0.0284        | 0.0883        | 0.184       | 0.5908        |      |
| MM088    | -0.0277    | 0.0123       | 0.0922      | 0.0136      | -0.011       | -0.0053      | -0.0588       | -0.0489        | -0.0053       | 0.4647       | 0.8516          | 0.0312        | 0.0765        | 0.1809      | 0.1809        |      |
| MM089    | -0.1335    | -0.0081      | 0.1532      | -0.1188     | -0.1051      | 0.0105       | -0.1188       | -0.0987        | 0.0105        | 0.006        | 0.1115          | 0.0335        | 0.1132        | 0.2357      | 0.2357        |      |
| MM090    | -0.144     | 0.0014       | 0.1102      | -0.0394     | -0.1422      | 0.0136       | -0.1855       | -0.0743        | 0.0136        | -0.0434      | 0.1405          | 0.0988        | 0.118         | 0.2254      | 0.2254        |      |
| MM093    | -0.205     | 0.2714       | 0.0421      | -0.1047     | 0.2178       | -0.0888      | -0.2088       | -0.2267        | -0.0888       | -0.0973      | -0.0358         | -0.0321       | 0.0372        | 0.47        | 0.47          |      |
| MM094    | -0.1741    | 0.7592       | 0.0059      | -0.1131     | 0.368        | -0.0806      | -0.1741       | -0.1292        | -0.0806       | -0.0992      | 0.4288          | -0.0349       | 0.0048        | 0.591       | 0.591         |      |
| MM096    | -0.0339    | -0.0064      | 0.0532      | -0.0339     | -0.0289      | 0.0029       | -0.0339       | -0.0497        | 0.0029        | 0.0017       | -0.0109         | 0.0026        | 0.0447        | 0.121       | 0.121         |      |
| MM100    | -0.0823    | 0.0097       | 0.1372      | -0.0049     | -0.0316      | 0.0116       | -0.0823       | -0.051         | 0.0116        | -0.8452      | 0.0097          | 0.0333        | 0.1027        | 0.2649      | 0.2649        |      |
| MM101    | -0.2659    | 0.6357       | -0.1412     | -0.2659     | 0.2396       | -0.233       | -0.2659       | -0.2698        | -0.233        | -0.2258      | 0.2984          | -0.2009       | -0.1441       | 0.4647      | 0.4647        |      |
| MM103    | -0.2129    | 0.2846       | 0.0101      | -0.2107     | 0.2489       | -0.1045      | -0.2107       | -0.212         | -0.1045       | 0.2879       | 0.3373          | -0.0603       | -0.0016       | 0.5754      | 0.5754        |      |
| MM104    | -0.1475    | -0.0072      | 0.1395      | -0.2531     | -0.1447      | 0.0608       | -0.1403       | -0.0835        | 0.0608        | 0.0082       | 0.0013          | 0.0315        | 0.1188        | 0.2609      | 0.7443        |      |
| MM105    | -0.102     | 0.3065       | 0.1274      | -0.102      | -0.0816      | -0.0078      | -0.102        | -0.1133        | -0.0078       | -0.038       | 0.3034          | 0.1666        | 0.0311        | 0.4943      | 0.4943        |      |
| MM108    | -0.0817    | 0.0066       | 0.171       | -1.03       | -0.2104      | -0.0102      | -0.1598       | -1.0938        | -0.0102       | -0.0319      | 0.1614          | 0.0349        | 0.1715        | 0.261       | 0.297         |      |
| MM110    | -0.061     | 0.0094       | 0.0837      | -0.0155     | -0.0318      | 0.0064       | -0.061        | -0.0825        | 0.6025        | 0.0172       | 0.0193          | 0.0897        | 0.0866        | 0.1584      | 0.1736        |      |

**Supplementary Table S9. Aminopeptidase gene copy number variation scores from MM patient samples in the FIMM dataset (n = 169). 7/15)**

| SampleID | <i>F11</i> | <i>JMJD7</i> | <i>KDM8</i> | <i>LAP3</i> | <i>LNPEP</i> | <i>LTA4H</i> | <i>METAP1</i> | <i>METAP1D</i> | <i>METAP2</i> | <i>MMP14</i> | <i>NAALADL1</i> | <i>NPEPL1</i> | <i>NPEPPS</i> | <i>PEPD</i> | <i>PGPEP1</i> | Gene |
|----------|------------|--------------|-------------|-------------|--------------|--------------|---------------|----------------|---------------|--------------|-----------------|---------------|---------------|-------------|---------------|------|
| MM113_1  | -0.223     | 0.7301       | 0.0571      | -0.1368     | 0.2975       | -0.0789      | -0.223        | -0.1844        | -0.0789       | -0.111       | 0.719           | -0.6716       | 0.0241        | 0.6314      | 0.6314        |      |
| MM114    | 0          | 0            | 0           | 0           | 0            | 0            | 0             | 0              | 0             | 0            | 0               | 0             | 0             | 0           | 0             |      |
| MM115    | 0.195      | 0            | 0           | 0.1371      | 0.1164       | 0            | 0.1371        | 0.1257         | 0             | 0            | 0               | 0             | 0             | 0           | 0             |      |
| MM116    | -0.1387    | 0.0816       | 0.1169      | -0.1194     | 0.0282       | 0.0644       | -0.1194       | -0.0735        | 0.0644        | -0.0122      | 0.0074          | 0.0518        | 0.1085        | 0.305       | 0.3998        |      |
| MM117_1  | 0          | 0            | 0           | 0           | 0            | 0            | 0             | 0              | 0             | 0            | 0               | 0             | 0             | 0           | 0             |      |
| MM118    | -0.1566    | 0.026        | 0.1174      | -0.1058     | -0.0863      | 0.0339       | -0.1058       | -0.131         | 0.0339        | -0.014       | 0.0394          | 0.0809        | 0.1666        | 0.8383      | 0.8383        |      |
| MM119    | 0.0715     | 0.0563       | 0.3738      | 0.0715      | 0.081        | 0.0932       | 0.0715        | -0.3246        | 0.0932        | 0.0474       | -0.3445         | -0.3705       | 0.0883        | 0.1542      | 0.112         |      |
| MM120    | -0.086     | 0.0685       | -0.0565     | -0.086      | 0.1844       | -0.1416      | -0.086        | -0.0789        | -0.1416       | -0.0655      | 0.1897          | 0.021         | -0.0065       | 0.1242      | 0.1242        |      |
| MM121    | -0.0599    | 0.0073       | 0.0838      | -0.0487     | -0.026       | 0.0175       | -0.0487       | -0.0447        | 0.0175        | -0.0103      | 0.0147          | 0.0468        | 0.0861        | 0.2553      | 0.2553        |      |
| MM122    | -0.0283    | 0.0021       | 0.0446      | -0.0283     | -0.0366      | -0.0152      | -0.0283       | -0.0241        | -0.0152       | -0.0005      | 0.0126          | 0.0244        | 0.0493        | 0.1424      | 0.1424        |      |
| MM123    | -0.1076    | 0.0132       | 0.1556      | -0.0742     | -0.0487      | 0.0225       | -0.0742       | -0.0608        | 0.0225        | 0.0316       | 0.0314          | 0.0702        | 0.1473        | 0.3272      | 0.3272        |      |
| MM126    | -0.0258    | -0.0086      | 0.0122      | -0.0258     | -0.0234      | -0.0007      | -0.0258       | -0.0251        | -0.0007       | 0.0027       | 0.0477          | 0.1218        | 0.0231        | 0.0628      | 0.0628        |      |
| MM128_1  | -0.1022    | 0.0372       | 0.2042      | -0.023      | -0.0272      | 0.0689       | -0.1022       | -0.1478        | 0.0689        | -0.0033      | 0.0602          | 0.1233        | 0.1801        | 0.3163      | 0.3163        |      |
| MM131    | -0.1453    | 0.0157       | 0.182       | -0.1421     | -0.19        | -0.2336      | -0.1421       | -0.1139        | -0.2336       | 0.0509       | 0.0161          | 0.0641        | 0.1746        | 0.366       | 0.366         |      |
| MM132    | -0.2075    | 0.4604       | 0.1092      | -0.2075     | -0.1447      | -0.0184      | -0.2075       | -0.1767        | -0.0184       | -0.1551      | 0.4766          | -0.7952       | 0.1408        | 0.8384      | 0.8384        |      |
| MM133    | -0.2689    | 0.1732       | 0.3009      | -0.1178     | -0.2809      | -0.0099      | -0.2891       | 0.0682         | -0.0099       | 0.4581       | 0.2439          | -0.2597       | 0.2465        | 0.526       | 0.526         |      |
| MM134    | 0.1852     | -0.0001      | 0.1674      | -0.4392     | -0.184       | 0.039        | 0.1852        | -0.3238        | 0.039         | -0.0418      | 0.067           | 0.0991        | 0.0241        | 0.2631      | 0.2631        |      |
| MM136    | -0.1356    | 0.0291       | 0.2237      | -0.0041     | -0.1013      | -0.0141      | -0.1356       | -0.1124        | -0.0141       | 0.0338       | 0.0175          | 0.0592        | 0.1611        | 0.3639      | 0.3639        |      |
| MM138    | -0.1907    | 0.1016       | 0.2149      | -0.3096     | -0.2605      | 0.0215       | -0.2413       | -0.3427        | 0.0215        | -0.7869      | 0.284           | -0.214        | 0.3762        | 0.5482      | 0.5482        |      |
| MM139    | -0.1889    | 0.5354       | 0.4509      | 0.2558      | -0.9595      | -0.5267      | -0.2695       | 0.0217         | -0.5267       | 0.1653       | 0.304           | -0.222        | 0.4011        | 0.597       | 0.597         |      |
| MM140    | 0.1905     | -0.0828      | 0.0209      | 0.1905      | -0.1433      | -0.0389      | 0.1905        | -0.1961        | -0.0389       | -0.0653      | 0.3173          | -0.0676       | 0.0374        | 0.1595      | 0.1595        |      |
| MM013    | -0.0419    | -0.0037      | 0.0779      | -0.0419     | -0.028       | -0.0066      | -0.0419       | -0.041         | -0.0066       | -0.8909      | 0.0005          | 0.0153        | 0.0542        | 0.1163      | 0.6527        |      |
| MM014_3  | -0.0791    | 0.3829       | 0.0592      | -0.0736     | -0.5559      | -0.2563      | -0.0791       | -0.242         | -0.2563       | -0.233       | -0.067          | -0.1827       | 0.4812        | 0.5809      | 0.7644        |      |
| MM016    | -0.1775    | -0.0816      | 0.0589      | -0.1775     | -0.1014      | -0.1115      | -0.1775       | -0.146         | -0.1115       | -0.0334      | -0.0202         | 0.0167        | 0.0335        | 0.473       | 0.473         |      |
| MM017_3  | -0.3912    | 0.3557       | -0.0134     | -0.3415     | -0.2302      | -0.1679      | -0.4785       | -0.1749        | -0.1679       | -0.1491      | -0.0726         | 0.0713        | -0.02         | -0.2404     | 0.449         |      |
| MM020    | 0.031      | 0.4379       | -0.075      | 0.031       | -0.1035      | -0.1384      | 0.031         | 0.051          | -0.1384       | -0.3827      | 0.1189          | -0.1163       | -0.0923       | 0.1317      | 0.1377        |      |
| MM026    | 0.3137     | 0.3882       | -0.0771     | -0.1886     | 0.3503       | -0.2236      | 0.3137        | -0.2091        | -0.2236       | -0.157       | 0.4133          | -0.138        | 0.4591        | -0.0001     | -0.0001       |      |
| MM027    | -0.1586    | 0.0052       | 1.1304      | -0.0567     | -0.0607      | -0.013       | -0.153        | -0.5181        | -0.013        | -0.0494      | 0.0627          | 0.0281        | 0.2363        | 0.2408      | 0.2408        |      |
| MM028    | -0.1181    | -0.0167      | 0.067       | -0.0985     | -0.0364      | 0.0719       | -0.1177       | -0.086         | 0.0719        | -0.0091      | 0.0391          | 0.038         | 0.0907        | 0.1997      | 0.1997        |      |
| MM029    | -0.0874    | -0.0142      | 0.1057      | -0.0874     | -0.0524      | 0.0055       | -0.0874       | -0.117         | 0.0055        | 0.0137       | 0.0019          | 0.0194        | 0.1028        | 0.2235      | 0.2235        |      |
| MM030_1  | -0.2722    | 0.1974       | -0.0164     | -0.2722     | 0.0967       | -0.1467      | -0.2722       | 0.2209         | -0.1467       | -0.1709      | 0.1878          | -0.0491       | 0.1973        | 0.4361      | 0.4361        |      |
| MM030_2  | -0.1998    | 0.1455       | -0.0218     | -0.1774     | 0.0176       | -0.1776      | -0.1774       | 0.1023         | -0.1776       | -0.1107      | 0.1082          | -0.0677       | 0.1238        | 0.2979      | 0.2979        |      |
| MM031_2  | -0.0137    | 0.0334       | 0.0147      | 0.0546      | 0.0287       | -0.0532      | 0.0218        | 0.1736         | -0.0532       | 0.0075       | 0.5985          | 0.0292        | 0.0414        | 0.0179      | 0.0179        |      |
| MM032_2  | 0.2611     | 0.2846       | -0.1944     | 0.3143      | 0.2626       | 0.0147       | 0.2611        | 0.089          | 0.0147        | -0.0747      | 0.0512          | -0.2903       | -0.1495       | 0.0718      | 0.0718        |      |
| MM033_4  | -0.0593    | 0.4365       | 0.0374      | -0.0593     | -0.8908      | -0.0236      | -0.0593       | -0.1052        | -0.0236       | -0.0188      | -0.0078         | 0.0026        | -0.0428       | 0.2827      | 0.2827        |      |

**Supplementary Table S9. Aminopeptidase gene copy number variation scores from MM patient samples in the FIMM dataset (n = 169). (8/15)**

| SampleID | <i>F11</i> | <i>JMJD7</i> | <i>KDM8</i> | <i>LAP3</i> | <i>LNPEP</i> | <i>LTA4H</i> | <i>METAP1</i> | <i>METAP1D</i> | <i>METAP2</i> | <i>MMP14</i> | <i>NAALADL1</i> | <i>NPEPL1</i> | <i>NPEPPS</i> | <i>PEPD</i> | <i>PGPEP1</i> | Gene |
|----------|------------|--------------|-------------|-------------|--------------|--------------|---------------|----------------|---------------|--------------|-----------------|---------------|---------------|-------------|---------------|------|
| MM033_1  | -0.0386    | 0.4588       | -0.0922     | -0.0595     | -0.1065      | -0.0301      | -0.0595       | -0.0389        | -0.0301       | -0.0188      | -0.0508         | -0.0543       | -0.026        | -0.0128     | 0.3495        |      |
| MM033_2  | 0.1236     | 0.4838       | -0.0735     | 0.1162      | -0.6202      | 0.0659       | 0.0923        | 0.1243         | 0.0659        | -0.0144      | -0.0277         | -0.0601       | -0.0279       | 0.1938      | 0.1938        |      |
| MM033_3  | 0.0063     | 0.5279       | -0.027      | 0.0063      | -0.87        | 0.047        | 0.0063        | -0.0307        | 0.047         | 0.0312       | -0.021          | -0.022        | -0.0246       | 0.304       | 0.304         |      |
| MM001    | -0.0443    | 0.0652       | -0.0269     | -0.0443     | 0.0416       | 0.0418       | -0.0443       | 0.0344         | 0.0418        | -0.2494      | 0.0348          | -0.0655       | 0.0385        | 0.0058      | 0.0058        |      |
| MM034_2  | -0.0739    | 0.0255       | 0.1077      | -0.0739     | -0.0102      | -0.0008      | -0.0739       | -0.0578        | -0.0008       | -0.0145      | 0.0221          | 0.0391        | 0.1108        | 0.2603      | 0.2603        |      |
| MM034_1  | -0.2341    | 0.258        | 0.0447      | -0.1504     | -0.128       | -0.2321      | -0.38         | -0.3068        | -0.2321       | -0.0396      | 0.0949          | -0.126        | 0.0559        | 0.5217      | 0.5217        |      |
| MM035    | -0.0808    | -0.0099      | 0.1157      | 0.0564      | -0.2842      | 0.0211       | -0.1255       | -0.8764        | 0.0211        | -0.0249      | 0.0842          | 0.0881        | 0.1044        | 0.2826      | 0.2826        |      |
| MM036_1  | -0.2247    | -0.1136      | 0.04        | 0.2553      | 0.4098       | -0.135       | -0.2247       | -0.1934        | -0.135        | -0.1145      | -0.0925         | -0.0705       | 1.0165        | 0.7059      | 0.7862        |      |
| MM036_2  | -0.1171    | -0.1228      | -0.0006     | -0.1171     | 0.3928       | -0.0606      | -0.1171       | -0.1877        | -0.0606       | -0.1016      | -0.0878         | -0.073        | 1.0811        | 0.7548      | 0.7548        |      |
| MM037    | -0.0738    | 0.0216       | 0.1435      | -0.0332     | -0.0706      | -0.5576      | -0.0893       | -0.0637        | -0.5576       | 0.0086       | 0.0318          | -0.0014       | 0.1053        | 0.2159      | 0.2159        |      |
| MM038    | -0.3455    | 0.0151       | 0.2821      | -0.7488     | 0.1001       | -0.8233      | -0.373        | -0.3864        | -0.3493       | 0.0185       | 0.1958          | -0.3545       | 0.8622        | 0.7691      | 0.9648        |      |
| MM039    | -0.2097    | 0.4136       | 0.6175      | -0.8585     | -0.1896      | 0.0185       | -0.9009       | -0.1734        | 0.0185        | -0.0573      | 0.5603          | 0.1047        | 0.177         | 0.7335      | 0.7335        |      |
| MM040    | -0.0688    | -0.0015      | 0.0825      | -0.0688     | -0.0369      | 0.0038       | -0.0688       | -0.0308        | 0.0038        | 0.0057       | 0.0058          | 0.0424        | 0.0802        | 0.116       | 0.116         |      |
| MM041    | -0.1183    | -0.0131      | 0.1979      | -0.0264     | -0.2723      | -0.172       | -0.1506       | -0.1536        | -0.172        | -0.0382      | 0.0561          | 0.0659        | 0.1013        | 0.2258      | 0.2388        |      |
| MM042    | -0.1784    | -0.0139      | -0.0427     | -0.1854     | 0.3162       | -0.0497      | -0.1784       | -0.1437        | -0.0497       | -0.0381      | -0.0541         | 0.0674        | 0.4198        | 0.3924      | 0.3924        |      |
| MM043_1  | -0.0175    | -0.0027      | 0.0138      | -0.0175     | -0.0082      | 0.0007       | -0.0175       | -0.0174        | 0.0007        | -0.0214      | -0.0012         | -0.0006       | -0.0512       | 0.1041      | 0.1041        |      |
| MM043_2  | -0.0391    | 0.2216       | -0.0529     | -0.0153     | 0.4691       | 0.3841       | -0.0017       | 0.295          | 0.3841        | -0.1021      | -0.0559         | -0.0149       | 0.0546        | 0.0019      | 0.0019        |      |
| MM044    | -0.0519    | 0.079        | 0.0899      | -0.0436     | 0.005        | 0.0397       | -0.0436       | -0.0259        | 0.0397        | -0.2469      | 0.0132          | 0.0408        | 0.0305        | 0.1569      | 0.3262        |      |
| MM045    | -0.0367    | 0.3384       | -0.111      | -0.0367     | 0.0194       | -0.1262      | -0.0367       | -0.0168        | -0.1262       | -0.1332      | 0.2401          | -0.086        | 0.0733        | 0.2831      | 0.2831        |      |
| MM046_1  | 0.0505     | 0.0072       | -0.0185     | 0.0505      | 0.0223       | 0.013        | 0.0505        | 0.0302         | 0.013         | 0.0263       | -0.0032         | -0.0313       | -0.0231       | -0.0219     | -0.0219       |      |
| MM046_2  | 0.0505     | 0.0072       | -0.0185     | 0.0505      | 0.0223       | 0.013        | 0.0505        | 0.0302         | 0.013         | 0.0263       | -0.0032         | -0.0313       | -0.0231       | -0.0219     | -0.0219       |      |
| MM047    | -0.1992    | 0.3729       | -0.06       | -0.9158     | 0.3283       | -0.1097      | -0.1992       | -0.155         | -0.1097       | -0.1027      | 0.7073          | -0.0324       | 0.3415        | 0.562       | 0.562         |      |
| MM048_1  | -0.1335    | 0.3767       | -0.0461     | -0.1335     | 0.2144       | -0.0988      | -0.1335       | -0.129         | -0.0988       | -0.0489      | 0.3709          | -0.0814       | -0.0583       | 0.4753      | 0.4753        |      |
| MM048_2  | -0.0789    | 0.3832       | -0.1222     | -0.1485     | 0.4845       | -0.0409      | -0.0738       | 0.1149         | -0.1868       | -0.1556      | 0.4026          | -0.0425       | -0.1238       | 0.4002      | 0.4002        |      |
| MM049    | -0.2958    | 0.7859       | -0.0544     | -0.2958     | 0.262        | -0.1174      | -0.2958       | 0.0769         | -0.1174       | -0.1582      | 0.8338          | -0.1319       | 0.0024        | 0.7398      | 0.7398        |      |
| MM050    | -0.0059    | 0.0358       | 0.0855      | -0.0059     | 0.0091       | 0.0232       | -0.0059       | -0.7303        | 0.0232        | 0.0172       | 0.0442          | 0.0653        | 0.0638        | 0.0966      | 0.0966        |      |
| MM051_2  | 0.011      | 0.1149       | 0.1008      | 0.0274      | 0.0387       | 0.1073       | 0.0551        | 0.1258         | 0.1073        | 0.0804       | 0.0631          | 0.1725        | 0.0735        | 0.0546      | 0.1528        |      |
| MM052_1  | -0.1046    | -0.0188      | 0.0504      | -0.0548     | -0.0898      | -0.0147      | -0.1046       | -0.1132        | -0.0147       | -0.0223      | 0.1243          | -0.0239       | 0.0442        | 0.1574      | 0.1574        |      |
| MM052_2  | 0.0404     | -0.0839      | -0.1355     | -0.1463     | 0.023        | 0.0434       | 0.0404        | 0.0422         | 0.0434        | -0.0447      | -0.1676         | -0.2957       | -0.1051       | -0.186      | -0.186        |      |
| MM054    | -0.141     | 0.2638       | 0.2243      | -0.141      | -0.0781      | -0.0032      | -0.141        | -0.1767        | -0.0032       | -0.2759      | 0.199           | 0.1677        | 0.1634        | 0.3214      | 0.3214        |      |
| MM055    | -0.2072    | 0.338        | 0.0804      | -0.1911     | 0.204        | -0.0558      | -0.2038       | -0.1592        | -0.0558       | 0.2765       | 0.3277          | -0.0586       | 0.0047        | 0.6352      | 0.6352        |      |
| MM056_2  | -0.2136    | 0.6464       | -0.2615     | -0.2599     | 0.2105       | -0.2098      | -0.2136       | 0.0069         | -0.2098       | -0.2085      | 0.2867          | -0.2768       | -0.1695       | 0.1404      | 0.1404        |      |
| MM057_4  | -0.1745    | 0.3765       | -0.0457     | -0.1745     | 0.0727       | -0.1521      | -0.1745       | -0.1372        | -0.1521       | -0.1599      | 0.4527          | -0.0575       | 0.1959        | 0.0744      | 0.0744        |      |
| MM057_5  | -0.0811    | -0.0793      | 0.083       | -0.0811     | -0.0345      | -0.0725      | -0.0811       | -0.0396        | -0.0725       | -0.088       | 0.5647          | 0.034         | 0.2028        | 0.1709      | 0.1709        |      |
| MM057_6  | -0.088     | -0.0642      | 0.0559      | -0.088      | -0.0516      | -0.0743      | -0.088        | -0.0568        | -0.0743       | -0.046       | 0.5786          | 0.0188        | 0.3116        | 0.1673      | 0.1673        |      |

**Supplementary Table S9. Aminopeptidase gene copy number variation scores from MM patient samples in the FIMM dataset (n = 169). (9/15)**

| SampleID | <i>F11</i> | <i>JMJD7</i> | <i>KDM8</i> | <i>LAP3</i> | <i>LNPEP</i> | <i>LTA4H</i> | <i>METAP1</i> | <i>METAP1D</i> | <i>METAP2</i> | <i>MMP14</i> | <i>NAALADL1</i> | <i>NPEPL1</i> | <i>NPEPPS</i> | <i>PEPD</i> | <i>PGPEP1</i> | Gene |
|----------|------------|--------------|-------------|-------------|--------------|--------------|---------------|----------------|---------------|--------------|-----------------|---------------|---------------|-------------|---------------|------|
| MM057_1  | -0.1145    | 0.0112       | 0.013       | -0.0559     | -0.014       | -0.0406      | -0.1145       | -0.0717        | -0.0406       | -0.0405      | 0.5189          | 0.0325        | 0.0313        | 0.1452      | 0.1452        |      |
| MM057_2  | -0.1156    | -0.0113      | 0.0963      | -0.1156     | -0.0569      | -0.0088      | -0.1156       | -0.0825        | -0.0088       | -0.032       | 0.0728          | 0.041         | 0.0808        | 0.1843      | 0.1843        |      |
| MM057_3  | -0.2286    | 0.3885       | 0.0448      | -0.2286     | 0.3525       | -0.2011      | -0.2286       | -0.1648        | -0.2011       | -0.1915      | 0.5219          | -0.0045       | 0.145         | 0.3634      | 0.3634        |      |
| MM058_1  | -0.0578    | 0.0781       | 0.1436      | 0.7624      | -0.1123      | -0.5776      | -0.0578       | 0.0464         | -0.5776       | -0.5807      | 0.0919          | 0.1165        | 0.1417        | 0.2239      | 0.2239        |      |
| MM058_2  | -0.9805    | 1.9347       | 1.0508      | -0.9946     | -0.306       | -0.5019      | -0.9946       | -0.3445        | -0.5019       | -0.613       | 0.9038          | 0.48          | 0.5254        | 1.4564      | 1.7752        |      |
| MM059    | -0.1404    | -0.0174      | 0.1457      | -0.0659     | -0.0529      | -0.0292      | -0.1404       | -0.0618        | -0.0292       | -0.0306      | 0.134           | 0.074         | 0.1338        | 0.1859      | 0.2991        |      |
| MM060    | -0.0597    | -0.0209      | 0.1291      | -0.0089     | -0.1357      | -0.0441      | -0.0089       | -0.1772        | -0.0441       | -0.0182      | 0.0789          | 0.0462        | 0.107         | 0.2983      | 0.2983        |      |
| MM061_1  | -0.0371    | 0.0008       | 0.0352      | -0.013      | -0.0279      | 0.0033       | -0.0371       | -0.0353        | 0.0033        | -0.0112      | -0.0096         | -0.0079       | 0.1149        | 0.5168      | 0.5168        |      |
| MM061_2  | -0.022     | -0.0008      | 0.0328      | 0.0135      | -0.0331      | -0.0215      | -0.022        | -0.0307        | -0.0215       | -0.0329      | -0.018          | -0.0472       | 0.0611        | 0.5917      | 0.5917        |      |
| MM068_1  | -0.0449    | 0.0184       | 0.1239      | -0.0449     | -0.0157      | 0.0115       | -0.0449       | -0.0195        | 0.0115        | 0.0161       | 0.2311          | 0.0538        | 0.0777        | 0.1328      | 0.1328        |      |
| MM068_2  | -0.748     | 0.0381       | -0.1203     | -0.4979     | -0.2202      | -0.0456      | -0.748        | -0.3739        | -0.0456       | -0.2533      | 0.9251          | 0.4759        | 0.3094        | 0.4795      | 0.9993        |      |
| MM071    | -0.3458    | 0.6          | -0.0239     | -0.3458     | -0.2244      | -0.1877      | -0.3458       | -0.319         | -0.1877       | -0.1916      | 0.5388          | 0.3724        | 0.0203        | 0.7728      | 0.7728        |      |
| MM073    | -0.1392    | 0.4311       | 0.0463      | -0.1392     | 0.2984       | -0.0937      | -0.1392       | -0.1961        | -0.0937       | -0.0839      | 0.4375          | -0.0863       | 0.0338        | 0.4495      | 0.4495        |      |
| MM077    | 0.1157     | -0.0099      | 0.0544      | 0.1157      | -0.1914      | 0.0046       | 0.1157        | -0.2574        | 0.0046        | -0.2934      | -0.0001         | 0.2604        | 0.0525        | 0.0943      | 0.0943        |      |
| MM078_2  | -0.0819    | -0.001       | 0.114       | -0.0819     | -0.0397      | 0.0047       | -0.0819       | -0.0826        | 0.0047        | -0.0162      | 0.0073          | 0.0352        | 0.1041        | 0.1979      | 0.1979        |      |
| MM080    | -0.0889    | 0.0348       | 0.093       | -0.1019     | -0.0654      | -0.0213      | -0.1019       | -0.0957        | -0.0213       | -0.0157      | 0.0121          | 0.0132        | 0.073         | 0.204       | 0.204         |      |
| MM081    | -0.1538    | 0.1426       | 0.2541      | -0.0603     | -0.1872      | -0.1569      | -0.2404       | -0.2652        | -0.1569       | 0.1146       | 0.2884          | 0.1717        | 0.3996        | 0.3581      | 0.7106        |      |
| MM082    | -0.2629    | 0.8208       | -0.0377     | -0.2629     | 0.3097       | -0.1517      | -0.2629       | -0.2364        | -0.1517       | -0.1495      | 0.4558          | -0.0989       | -0.0529       | 0.6772      | 0.6772        |      |
| MM083_2  | -0.0794    | 0.0205       | 0.08        | -0.0461     | -0.0274      | 0.0346       | -0.0461       | -0.06          | 0.0346        | -0.0147      | 0.0243          | 0.0101        | 0.096         | 0.1651      | 0.1651        |      |
| MM084    | -0.1637    | 0.3773       | -0.1016     | -0.1637     | 0.3621       | -0.127       | -0.1637       | -0.172         | -0.127        | -0.1243      | 0.374           | -0.1383       | -0.0934       | 0.4263      | 0.4831        |      |
| MM091    | -0.2541    | 0.3971       | 0.0606      | -0.067      | 0.2523       | -0.1111      | -0.263        | -0.1797        | -0.1111       | -0.112       | 0.4275          | -0.0386       | 0.0161        | 0.119       | 0.119         |      |
| MM092    | -0.035     | -0.0037      | 0.1445      | -0.0273     | -0.1218      | -0.0107      | -0.0648       | -0.0364        | -0.0107       | -0.004       | 0.0018          | 0.0272        | 0.0474        | 0.0964      | 0.0964        |      |
| MM095    | -0.154     | -0.022       | 0.1141      | -0.018      | -0.1058      | -0.8423      | -0.1701       | -0.1312        | -0.8423       | -0.064       | 0.026           | 0.0426        | 0.0608        | 0.2101      | 0.2101        |      |
| MM097    | -0.1127    | 0.0895       | 0.1233      | -0.1127     | -0.1391      | -0.0247      | -0.1127       | -0.1512        | -0.0247       | -0.0165      | 0.222           | 0.1894        | 0.0918        | 0.2963      | 0.4534        |      |
| MM098    | 0.1593     | -0.6245      | -0.0499     | 0.2239      | 0.1084       | -0.018       | 0.2239        | 0.1179         | -0.018        | 0.0162       | 0.0083          | -0.0146       | -0.121        | -0.7449     | -0.7449       |      |
| MM099    | -0.2773    | 0.239        | 0.1789      | -0.4757     | -0.1354      | -0.9541      | -0.563        | -1.0329        | -0.3051       | -0.0315      | 0.0756          | 0.0807        | 0.1549        | 0.3856      | 0.3856        |      |
| MM102    | -0.0949    | 0.0001       | 0.1146      | -0.0949     | 0.0038       | -0.0317      | -0.0949       | -0.0739        | -0.0317       | 0.0082       | 0.0005          | 0.0107        | 0.1086        | 0.2785      | 0.2785        |      |
| MM107    | -0.1382    | 0.3836       | 0.5043      | -0.1209     | -0.1428      | 0.0001       | -0.696        | -0.1604        | 0.0001        | -0.0665      | 0.1213          | -0.0337       | 0.4861        | 0.1038      | 0.6388        |      |
| MM109    | 0.0076     | 0.0128       | 0.0167      | 0.0076      | 0.008        | 0.0099       | 0.0076        | -0.0087        | 0.0099        | 0.0269       | -0.0021         | -0.0033       | 0.0479        | 0.0632      | 0.0632        |      |
| MM111_1  | -0.1543    | -0.0184      | 0.6783      | -0.0991     | -0.0898      | -0.0633      | -0.1543       | -0.1361        | -0.0633       | -0.0324      | -0.0139         | 0.0049        | 0.1735        | 0.1806      | 0.264         |      |
| MM111_2  | -0.1545    | -0.0148      | 0.728       | -0.1582     | -0.1797      | -0.0148      | -0.1582       | -0.1494        | -0.0148       | -0.0146      | 0.0507          | 0.0417        | 0.4597        | 0.2625      | 0.8396        |      |
| MM002_1  | -0.2783    | 0.6257       | 0.1501      | -0.1779     | 0.0575       | -0.1737      | -0.318        | -0.2203        | -0.1737       | -0.1064      | 0.7339          | -0.0189       | 0.03          | 0.6017      | 0.6017        |      |
| MM002_2  | -0.2747    | 0.6647       | 0.1333      | -0.1424     | 0.2746       | -0.0963      | -0.2639       | -0.2664        | -0.0963       | -0.1254      | 0.712           | -0.0445       | 0.0313        | 0.5755      | 0.6686        |      |
| MM002_3  | -0.243     | 0.6875       | 0.1381      | -0.1853     | 0.2698       | -0.1156      | -0.1853       | -0.1902        | -0.1156       | -0.1108      | 0.7139          | -0.0372       | 0.0179        | 0.6126      | 0.6126        |      |
| MM113_2  | -0.1403    | 0.0226       | 0.1698      | -0.1403     | -0.0798      | -0.0036      | -0.1403       | -0.1065        | -0.0036       | -0.0099      | 0.0556          | 0.0826        | 0.1397        | 0.3615      | 0.3615        |      |

**Supplementary Table S9. Aminopeptidase gene copy number variation scores from MM patient samples in the FIMM dataset (*n* = 169). (10/15)**

| SampleID | <i>FII</i> | <i>JMJD7</i> | <i>KDM8</i> | <i>LAP3</i> | <i>LNPEP</i> | <i>LTA4H</i> | <i>METAP1</i> | <i>METAP1D</i> | <i>METAP2</i> | <i>MMP14</i> | <i>NAALADL1</i> | <i>NPEPL1</i> | <i>NPEPPS</i> | <i>PEPD</i> | <i>PGPEP1</i> | Gene |
|----------|------------|--------------|-------------|-------------|--------------|--------------|---------------|----------------|---------------|--------------|-----------------|---------------|---------------|-------------|---------------|------|
| MM003    | -0.3524    | 0.2865       | 0.0854      | -0.0989     | 0.113        | 0.0752       | -0.4148       | -0.3592        | 0.0752        | -0.1073      | 0.0595          | -0.2625       | 0.4261        | 0.1153      | 1.026         |      |
| MM004    | -0.1081    | 0.0737       | 0.0433      | -0.012      | -0.0433      | 0.0548       | -0.1081       | -0.0862        | 0.0548        | -0.0239      | 0.1088          | -0.0085       | 0.0807        | 0.3105      | 0.3105        |      |
| MM117_2  | -0.2306    | 0.5381       | 0.2282      | -0.2013     | -0.138       | -0.08        | -0.2013       | -0.1525        | -0.08         | -0.9283      | 0.0312          | 0.1396        | 0.258         | 0.317       | 0.5582        |      |
| MM124    | -0.1731    | -0.0278      | 0.0918      | 0.4806      | -0.1013      | -0.0248      | -0.1731       | -0.1745        | -0.0248       | -0.0071      | -0.0232         | -0.0116       | 0.1136        | 0.2848      | 0.2848        |      |
| MM129    | -0.545     | 0.1688       | 0.4688      | -1.3921     | -0.3826      | -0.0563      | -0.6332       | -0.2081        | -0.0563       | 0.3428       | 0.2177          | 0.3963        | 0.4344        | 0.6179      | 0.9567        |      |
| MM130    | -0.1123    | 0.0194       | 0.0409      | -0.0707     | -0.0444      | 0.0706       | -0.0707       | -0.0683        | 0.0706        | -0.0073      | 0.0142          | 0.0274        | 0.116         | 0.2188      | 0.2188        |      |
| MM005    | -0.3131    | 0.6209       | 0.0416      | -0.7536     | -0.3231      | -0.1285      | -0.7928       | -0.4598        | -0.1285       | 0.3233       | 0.041           | 0.1433        | -0.1929       | 0.2454      | 0.2454        |      |
| MM135    | -0.1542    | -0.0563      | 0.1262      | -0.1142     | -0.1464      | -0.0355      | -1.1616       | -0.1957        | -0.0355       | -0.0374      | 0.6273          | 0.0097        | 0.0546        | 0.7857      | 0.7857        |      |
| MM137    | 0.1252     | 0.4723       | 0.0877      | 0.3274      | -0.4066      | 0.0567       | 0.0795        | -0.4491        | 0.0567        | -0.0728      | 0.644           | -0.0063       | 0.2212        | 0.8695      | 0.8695        |      |
| MM006    | -0.0407    | 0.0367       | 0.1764      | -0.0407     | -0.0818      | -0.8002      | -0.0407       | -0.0406        | -0.8002       | -0.8504      | 0.0466          | 0.0525        | 0.1512        | 0.2693      | 0.2693        |      |
| MM007    | -0.0999    | -0.0149      | 0.0687      | -0.0638     | -0.1097      | 0.0385       | -0.0999       | -0.1074        | 0.0385        | 0.0371       | 0.0774          | 0.016         | 0.0575        | 0.1348      | 0.1348        |      |
| MM008    | -0.0856    | 0.0084       | 0.1362      | -0.0856     | -0.0956      | 0.01         | -0.0856       | -0.0666        | 0.01          | 0.0099       | 0.0544          | 0.0285        | 0.1373        | 0.3049      | 0.3049        |      |
| MM009    | -0.0273    | 0.1795       | -0.1487     | -0.0459     | 0.0978       | -0.0165      | -0.0159       | -0.0307        | -0.0165       | -0.0356      | 0.2385          | -0.0614       | -0.0338       | 0.1303      | 0.1303        |      |
| MM010    | -0.2165    | 0.039        | 1.1137      | -0.1235     | 0.2058       | -0.0694      | -0.2165       | -0.0936        | -0.0694       | -0.0815      | 0.5112          | 0.4566        | -0.007        | 0.5433      | 0.5433        |      |
| MM011    | -0.1385    | 0.0057       | 0.1765      | -0.149      | -0.0283      | 0.0184       | -0.5099       | -0.4058        | 0.0184        | -0.1273      | 0.0917          | 0.0867        | 0.1234        | -0.1037     | 0.318         |      |
| MM014_4  | 0.1612     | 0.3063       | -0.1055     | 0.1448      | -0.1038      | -0.1382      | 0.1093        | -0.079         | -0.1382       | -0.1545      | -0.1597         | -0.142        | 0.5374        | 0.2511      | 0.2511        |      |
| MM014_1  | 0.2806     | 0.3258       | -0.0474     | 0.3027      | -0.1482      | -0.135       | 0.2653        | -0.1533        | -0.135        | -0.1706      | -0.0748         | -0.1062       | 0.3286        | 0.3095      | 0.3095        |      |
| MM014_2  | 0.1961     | 0.319        | -0.0242     | 0.2075      | -0.2341      | -0.143       | 0.1961        | -0.2489        | -0.143        | -0.1747      | -0.1333         | -0.1233       | 0.3531        | 0.4583      | 0.4583        |      |
| MM015    | -0.1712    | 0.0047       | 0.1729      | -0.0835     | -0.0672      | 0.0582       | -0.1712       | -0.0965        | 0.0582        | -0.1631      | 0.0318          | 0.1049        | 0.1827        | 0.2473      | 0.4304        |      |
| MM017_1  | -0.1565    | 0.3831       | -0.053      | -0.1565     | 0.3532       | -0.1213      | -0.1565       | -0.1347        | -0.1213       | -0.1112      | -0.0685         | -0.0758       | -0.0548       | -0.0466     | 0.4671        |      |
| MM019    | -0.1725    | 0.6856       | -0.0168     | -0.1725     | -0.1743      | -0.1082      | -0.1725       | -0.1561        | -0.1082       | -0.1181      | 0.7521          | -0.0706       | -0.0964       | 0.4928      | 0.4928        |      |
| MM022_1  | -0.0233    | -0.0158      | 0.0082      | -0.0233     | -0.0259      | -0.0005      | -0.0233       | -0.0362        | -0.0005       | 0.0018       | -0.045          | -0.0369       | 0.0157        | 0.0452      | 0.0452        |      |
| MM022_2  | -0.0092    | 0.0385       | 0.0591      | -0.0924     | 0.0133       | -0.048       | 0.0192        | 0.0152         | -0.048        | -0.0788      | 0.0851          | 0.0329        | 0.0223        | 0.0932      | 0.0932        |      |
| MM022_3  | -0.0328    | 0.0603       | 0.0733      | -0.0861     | 0.0248       | -0.0603      | 0.0028        | 0.1648         | -0.0603       | -0.0736      | 0.1436          | 0.0719        | 0.0512        | 0.0701      | 0.0701        |      |
| MM023    | -0.1146    | 0.3937       | -0.0707     | -0.1316     | 0.362        | -0.0928      | -0.1316       | -0.1066        | -0.0928       | -0.1024      | 0.4066          | -0.0689       | -0.0676       | 0.3808      | 0.4053        |      |
| MM024    | -0.0016    | 0.3156       | 0.0656      | 0.1591      | 0.2022       | -0.1217      | -0.0266       | -0.3923        | -0.1217       | -0.2258      | 0.4985          | 0.3644        | -0.2571       | 0.6312      | 0.6312        |      |
| MM025_1  | -0.2213    | 0.4381       | 0.1397      | -0.1861     | 0.363        | -0.1938      | -0.263        | -0.2277        | -0.1938       | -0.1049      | 0.8606          | 0.0086        | 0.0909        | 0.7752      | 0.7752        |      |
| MM025_2  | -0.3325    | 0.5526       | 0.3544      | -0.292      | -0.4055      | -0.2743      | -0.3619       | -0.1498        | -0.2743       | 0.1615       | 1.2062          | -0.0133       | 0.2687        | 0.8649      | 1.1099        |      |
| MM017_2  | -0.231     | 0.3244       | 0.0329      | -0.1914     | 0.2884       | -0.1332      | -0.1914       | 0.09005        | -0.1332       | -0.1263      | 0.0154          | -0.0362       | -0.0313       | 0.0616      | 0.5963        |      |



**Supplementary Table S9. Aminopeptidase gene copy number variation scores from MM patient samples in the FIMM dataset ( $n = 169$ ). (11/15)**

| SampleID | <i>RNPEP</i> | <i>RNPEPL1</i> | <i>TPP1</i> | <i>TPP2</i> | <i>TRHDE</i> | <i>XPNPEP1</i> | <i>XPNPEP2</i> | <i>XPNPEP3</i> | Gene |
|----------|--------------|----------------|-------------|-------------|--------------|----------------|----------------|----------------|------|
| MM032_1  | -0.0563      | -0.1779        | 0.0612      | -0.2732     | -0.1106      | -0.1331        | -0.1972        | 0.119          |      |
| MM051_1  | -0.2143      | -0.1009        | -0.0123     | -0.8163     | 0.0134       | -0.0844        | 0.0457         | -0.717         |      |
| MM053    | -0.044       | -0.278         | 0.3962      | -0.737      | -0.0209      | -0.1053        | -0.7828        | -1.0814        |      |
| MM056_1  | 0.5174       | -0.3571        | 0.1584      | -0.3176     | -0.307       | -0.311         | -1.0951        | -0.2825        |      |
| MM062    | -0.1559      | 0.0965         | 0.0457      | -0.0479     | -0.4272      | -0.0999        | -0.1817        | 0.1054         |      |
| MM063    | 0.0042       | -0.0184        | 0.0434      | -0.8516     | -0.0012      | 0.0002         | -0.0066        | 0.0597         |      |
| MM064    | -0.0722      | -0.1483        | -0.1149     | -1.0506     | -0.0848      | -1.0534        | 0.2991         | -0.9027        |      |
| MM065    | 0.5944       | -0.0343        | 0.0091      | -0.0361     | -0.0156      | -0.0223        | -0.0325        | -0.6622        |      |
| MM066    | 0.1976       | -0.0711        | 0.0492      | -0.0849     | -0.0168      | -0.014         | -0.0872        | 0.1524         |      |
| MM067    | -0.2727      | -0.2913        | 0.3213      | -0.4285     | -0.3408      | -0.2138        | -0.3477        | 0.02           |      |
| MM069    | -0.0961      | -0.1456        | 0.2025      | -0.1476     | -0.0982      | -0.1023        | -0.1364        | 0.0078         |      |
| MM070    | -0.1286      | -0.1521        | 0.224       | -0.6129     | -0.1193      | -0.1225        | -0.1337        | -0.0699        |      |
| MM072    | -0.2557      | -0.2604        | 0.3503      | -1.0694     | 0.2103       | -0.2307        | -0.2494        | -0.085         |      |
| MM074    | 0.014        | -0.0326        | -0.0049     | -0.0455     | 0.0407       | 0.003          | -0.5881        | 0.0742         |      |
| MM075    | -0.0604      | -0.1144        | 0.4198      | -0.1353     | -0.1014      | -0.0919        | 1.1492         | -0.0025        |      |
| MM076    | -0.0634      | -0.0699        | 0.209       | -0.0895     | -0.0294      | -0.0646        | -0.2389        | -0.0146        |      |
| MM078_1  | -0.0537      | -0.0801        | 0.3935      | -0.1141     | 0.009        | -0.0216        | -0.0237        | -0.249         |      |
| MM079    | -0.0615      | -0.0936        | 0.43        | -0.1245     | -0.0405      | -0.0612        | -0.0756        | 0.0715         |      |
| MM083_1  | 0.0038       | -0.0277        | 0.0138      | -0.0745     | 0.0026       | -0.0144        | -0.0153        | 0.0729         |      |
| MM085    | -0.063       | -0.0645        | 0.2093      | 0.2425      | -0.0786      | 0.2047         | 0.0007         | -0.1105        |      |
| MM086    | -0.0388      | 0.0291         | 0.1233      | -1.0137     | -0.1903      | -0.0445        | 0.644          | 0.2078         |      |
| MM087    | 0.6966       | -0.0267        | 0.0119      | -1.0018     | -0.0119      | -0.0374        | -0.0442        | 0.0938         |      |
| MM088    | 0.0258       | 0.0083         | 0.078       | -0.2916     | -0.0053      | 0.0207         | -0.1596        | 0.0981         |      |
| MM089    | 0.3101       | -0.0173        | -0.0056     | -0.1059     | 0.0105       | -0.0196        | -0.0263        | 0.1265         |      |
| MM090    | -0.0606      | -0.0743        | 0.036       | -0.9876     | 0.0136       | -0.0199        | -0.021         | -0.7271        |      |
| MM093    | 0.2632       | -0.2267        | -0.0358     | -0.6947     | -0.0888      | -0.1273        | -0.1101        | 0.0392         |      |
| MM094    | -0.0661      | -0.1292        | 0.4288      | -0.1555     | -0.0806      | -0.1012        | -0.9346        | -0.0017        |      |
| MM096    | -0.0407      | -0.0115        | -0.0109     | -0.0523     | 0.0029       | -0.0109        | 0.0061         | 0.0369         |      |
| MM100    | -0.009       | -0.051         | 0.0097      | -0.9103     | 0.0116       | 0.0006         | -0.0421        | 0.0881         |      |
| MM101    | 0.47         | -0.2698        | 0.2684      | -0.277      | -0.233       | -0.2321        | 0.6051         | -0.1391        |      |
| MM103    | -0.1415      | -0.0765        | 0.3373      | -0.2032     | -0.1045      | -0.1305        | -0.1611        | 0.0118         |      |
| MM104    | 0.2153       | -0.0835        | 0.0013      | -0.1234     | -0.1614      | -0.0971        | -0.39          | 0.669          |      |
| MM105    | -0.0547      | -0.0861        | 0.3034      | -0.6075     | -0.0078      | -0.1031        | -0.0745        | 0.0222         |      |
| MM108    | 0.4949       | -0.9191        | -0.0068     | -1.0758     | -0.0102      | -0.1091        | -0.0985        | 0.1459         |      |
| MM110    | 0.0227       | -0.0084        | 0.0031      | -0.9823     | -0.0109      | 0.0014         | -0.9551        | -0.7909        |      |

**Supplementary Table S9. Aminopeptidase gene copy number variation scores from MM patient samples in the FIMM dataset ( $n = 169$ ). (12/15)**

| SampleID | <i>RNPEP</i> | <i>RNPEPL1</i> | <i>TPP1</i> | <i>TPP2</i> | <i>TRHDE</i> | <i>XPNPEP1</i> | <i>XPNPEP2</i> | <i>XPNPEP3</i> | Gene |
|----------|--------------|----------------|-------------|-------------|--------------|----------------|----------------|----------------|------|
| MM113_1  | -0.122       | -0.1844        | 0.719       | -0.2125     | -0.0789      | -0.1356        | -0.1766        | 0.0312         |      |
| MM114    | -0.0736      | 0              | 0           | 0           | 0            | 0              | 0              | 0              |      |
| MM115    | 0.0807       | 0.1257         | 0           | 0           | 0            | 0              | 0              | 0              |      |
| MM116    | -0.0691      | -0.0735        | 0.0074      | -0.216      | 0.0644       | -0.0262        | -0.0668        | 0.1385         |      |
| MM117_1  | 0            | 0              | 0           | 0           | 0            | 0              | 0              | 0              |      |
| MM118    | 0.4444       | -0.0267        | 0.0394      | -0.8306     | 0.0339       | -0.0367        | -0.1215        | -0.1527        |      |
| MM119    | 0.6433       | -0.3463        | -0.359      | -0.9162     | 0.0932       | 0.0707         | -0.8987        | -0.8858        |      |
| MM120    | -0.0734      | -0.0789        | 0.1897      | 0.0027      | -0.1416      | -0.0785        | -0.134         | 0.0051         |      |
| MM121    | -0.0047      | -0.0447        | 0.0147      | -0.0517     | 0.0175       | -0.0269        | -0.5142        | 0.1026         |      |
| MM122    | -0.0113      | -0.0241        | 0.0126      | 0.0307      | -0.0152      | -0.0179        | -0.0254        | 0.0375         |      |
| MM123    | 0.0135       | -0.0608        | 0.0314      | -0.0891     | 0.0225       | -0.0363        | -0.826         | 0.1677         |      |
| MM126    | -0.0079      | -0.0251        | 0.0477      | -0.698      | -0.0007      | -0.0169        | -0.704         | 0.0085         |      |
| MM128_1  | 0.0324       | -0.1478        | 0.0602      | -1.0383     | 0.0689       | 0.0119         | 0.9835         | -0.7839        |      |
| MM131    | -0.038       | -0.1139        | 0.0161      | -0.1127     | -0.2336      | -0.0235        | -0.0698        | 0.1979         |      |
| MM132    | -0.1051      | -0.1767        | 0.4162      | -0.3598     | -0.0184      | -0.0732        | -0.1518        | 0.1428         |      |
| MM133    | -0.1915      | -0.0721        | -0.2162     | -0.2522     | -0.3627      | -0.2467        | -0.0584        | 0.4426         |      |
| MM134    | 0.398        | -0.3238        | 0.0635      | -0.4074     | 0.039        | -0.0375        | 0.9132         | -0.0959        |      |
| MM136    | -0.0744      | -0.0266        | 0.0175      | -0.0951     | -0.0141      | -0.0152        | -0.0585        | 0.1663         |      |
| MM138    | 0.0256       | -0.0018        | -0.2376     | -1.0418     | -0.3886      | -0.1687        | 0.1089         | 0.2873         |      |
| MM139    | -0.153       | 0.0017         | -0.1849     | -0.7072     | -1.0014      | -0.0778        | -0.7741        | -0.2262        |      |
| MM140    | -0.1211      | -0.0967        | 0.2812      | -0.1776     | -0.0389      | -0.1174        | -0.1085        | 0.0454         |      |
| MM013    | 0.5046       | -0.041         | 0.0495      | -0.9052     | -0.0066      | -0.0257        | -0.0351        | 0.0603         |      |
| MM014_3  | 0.2009       | -0.3347        | -0.0189     | -1.1993     | -0.2563      | -0.165         | -0.3915        | 0.1047         |      |
| MM016    | 0.2859       | -0.1162        | -0.0202     | -0.7106     | -0.1115      | -0.0561        | -0.1164        | 0.0956         |      |
| MM017_3  | 0.7527       | -0.1749        | -0.0389     | -0.9325     | -0.1679      | -0.0528        | -1.0394        | 0.079          |      |
| MM020    | 0.0101       | 0.1661         | 0.1189      | -0.1779     | -0.1384      | -0.108         | -0.8735        | -0.071         |      |
| MM026    | 0.3683       | -0.2091        | 0.3955      | -1.1479     | -0.2236      | 0.3529         | -0.183         | -0.0809        |      |
| MM027    | -0.0226      | -0.5181        | -0.0092     | -0.151      | -0.013       | -0.0334        | -0.0395        | 0.2242         |      |
| MM028    | -0.0335      | -0.086         | 0.0391      | -0.117      | -0.0171      | -0.0217        | 0.0344         | 0.107          |      |
| MM029    | 0.5028       | -0.0412        | 0.0019      | -0.0892     | 0.0055       | -0.0526        | -0.9201        | 0.0864         |      |
| MM030_1  | 0.1005       | -0.2386        | 0.1878      | -0.7179     | -0.1467      | -0.0333        | -0.2161        | -0.0096        |      |
| MM030_2  | 0.1254       | -0.1673        | -0.0753     | -0.4588     | -0.1776      | -0.0749        | -0.1855        | -0.1074        |      |
| MM031_2  | -0.0761      | 0.1192         | 0.57        | 0.0203      | -0.0532      | 0.0114         | 0.1324         | 0.0559         |      |
| MM032_2  | -0.0397      | -0.2131        | 0.0512      | 0.1386      | 0.0147       | -0.0746        | -0.3739        | -0.2384        |      |
| MM033_4  | 0.3517       | -0.1052        | -0.0078     | -0.8056     | -0.0236      | -0.0158        | -0.0879        | 0.0753         |      |

**Supplementary Table S9. Aminopeptidase gene copy number variation scores from MM patient samples in the FIMM dataset (n = 169). (13/15)**

| SampleID | <i>RNPEP</i> | <i>RNPEPL1</i> | <i>TPP1</i> | <i>TPP2</i> | <i>TRHDE</i> | <i>XPNPEP1</i> | <i>XPNPEP2</i> | <i>XPNPEP3</i> | Gene |
|----------|--------------|----------------|-------------|-------------|--------------|----------------|----------------|----------------|------|
| MM033_1  | 0.408        | -0.126         | -0.11       | -0.1835     | -0.0301      | -0.0598        | -0.0249        | -0.0358        |      |
| MM033_2  | -0.1109      | -0.0992        | -0.0435     | -0.1881     | 0.0659       | -0.0361        | -0.0159        | -0.0416        |      |
| MM033_3  | -0.0539      | -0.0307        | -0.021      | -0.7625     | 0.047        | 0.0028         | -0.0506        | -0.0064        |      |
| MM001    | 0.4555       | 0.0344         | 0.0348      | -0.6172     | 0.0418       | 0.0513         | -0.6255        | 0.0358         |      |
| MM034_2  | -0.0248      | -0.0578        | 0.0221      | -0.0765     | -0.0008      | -0.0357        | -0.115         | 0.1253         |      |
| MM034_1  | -0.2225      | -0.1034        | 0.205       | -1.4194     | -0.2321      | -0.1284        | -0.4236        | 0.0759         |      |
| MM035    | 0.4125       | -0.7303        | 0.0468      | -0.8487     | 0.0211       | -0.0035        | -0.0314        | -0.6312        |      |
| MM036_1  | 0.8143       | -0.0845        | -0.1295     | -0.2423     | -0.135       | -0.1732        | -0.2118        | -0.0148        |      |
| MM036_2  | 0.8075       | -0.132         | -0.0878     | -0.2482     | -0.0943      | -0.145         | -0.1644        | -0.0448        |      |
| MM037    | 0.7356       | -0.0153        | -0.7429     | -0.0666     | -0.2847      | -0.0684        | -0.5395        | 0.1213         |      |
| MM038    | 0.9235       | -0.1153        | -0.3315     | -0.7546     | -0.5287      | -0.268         | -0.6532        | 0.1954         |      |
| MM039    | -0.1415      | 0.2082         | 0.6937      | -0.2041     | 0.0185       | -0.7253        | -0.127         | 0.0867         |      |
| MM040    | -0.0051      | -0.0308        | 0.0058      | -0.0505     | 0.0038       | -0.0099        | -0.0655        | 0.0819         |      |
| MM041    | -0.0228      | -0.0462        | 0.0164      | -0.1183     | -0.172       | 0.024          | 0.0293         | 0.144          |      |
| MM042    | -0.025       | -0.2057        | -0.1206     | -0.1884     | -0.0497      | -0.1577        | -0.1423        | -0.062         |      |
| MM043_1  | 0.5102       | -0.017         | -0.0012     | -0.8943     | 0.0007       | -0.0113        | 0.0234         | 0.007          |      |
| MM043_2  | 0.8661       | -0.0535        | 0.0663      | -0.7204     | 0.1703       | -0.0049        | 1.8061         | -0.0632        |      |
| MM044    | 0.1442       | -0.0259        | 0.0132      | -0.1917     | 0.0397       | -0.015         | -0.4619        | 0.0757         |      |
| MM045    | -0.1312      | 0.0114         | 0.2401      | -0.2085     | -0.1262      | -0.1374        | -0.1388        | -0.002         |      |
| MM046_1  | 0.0144       | 0.0302         | -0.0032     | 0.048       | 0.013        | 0.009          | -0.0118        | -0.0659        |      |
| MM046_2  | 0.0144       | 0.0302         | -0.0032     | 0.048       | 0.013        | 0.009          | -0.0118        | -0.0659        |      |
| MM047    | -0.1206      | -0.155         | 0.4042      | -0.2918     | -0.1097      | -0.115         | 0.3639         | 0.0168         |      |
| MM048_1  | 0.0925       | -0.129         | 0.3709      | -0.0847     | -0.0988      | -0.0932        | -0.1368        | -0.0585        |      |
| MM048_2  | 0.4142       | -0.0474        | 0.4592      | -0.0445     | -0.2203      | -0.0585        | -0.1624        | -0.0666        |      |
| MM049    | -0.1937      | -0.2552        | 0.8338      | -0.3187     | -0.1174      | -0.1629        | -0.2861        | 0.0299         |      |
| MM050    | 0.4439       | -0.7303        | 0.0442      | -0.7335     | 0.0232       | 0.0212         | 0.012          | -0.6484        |      |
| MM051_2  | 0.0797       | 0.0344         | 0.0559      | -0.4631     | 0.1073       | 0.1008         | 0.0598         | -0.4233        |      |
| MM052_1  | 0.8025       | -0.0594        | 0.1243      | -0.1141     | -0.0147      | -0.0779        | -0.0705        | 0.0369         |      |
| MM052_2  | 0.7922       | -1.6292        | -0.3316     | 0.0113      | 0.0434       | -0.0858        | -0.1824        | -0.3175        |      |
| MM054    | 0.7792       | -0.0144        | 0.199       | -0.9322     | -0.0032      | 0.0314         | -0.8713        | 0.2932         |      |
| MM055    | -0.1085      | -0.1592        | 0.3277      | -0.3184     | -0.0558      | -0.2399        | -0.0565        | 0.0172         |      |
| MM056_2  | 0.482        | 0.0069         | 0.2867      | -0.1841     | -0.2098      | -0.2183        | -1.0603        | -0.3081        |      |
| MM057_4  | 0.1853       | -0.1372        | 0.4664      | -0.207      | -0.1521      | -0.1672        | -0.2744        | 0.6007         |      |
| MM057_5  | 0.0654       | -0.0396        | 0.5647      | -0.1365     | -0.0725      | -0.0727        | -0.1651        | 0.7727         |      |
| MM057_6  | -0.0217      | -0.0568        | 0.5786      | -0.116      | -0.0743      | -0.0792        | -0.1635        | 0.8145         |      |

**Supplementary Table S9. Aminopeptidase gene copy number variation scores from MM patient samples in the FIMM dataset ( $n = 169$ ). (14/15)**

| SampleID | <i>RNPEP</i> | <i>RNPEPL1</i> | <i>TPP1</i> | <i>TPP2</i> | <i>TRHDE</i> | <i>XPNPEP1</i> | <i>XPNPEP2</i> | <i>XPNPEP3</i> | Gene |
|----------|--------------|----------------|-------------|-------------|--------------|----------------|----------------|----------------|------|
| MM057_1  | -0.0064      | -0.0717        | 0.5189      | -0.0838     | -0.0406      | -0.0489        | -0.0294        | 0.6739         |      |
| MM057_2  | -0.0145      | -0.0825        | 0.0728      | -0.1013     | -0.0328      | -0.0385        | -0.0543        | 0.1328         |      |
| MM057_3  | -0.0798      | -0.1648        | 0.5219      | -0.2765     | -0.2011      | -0.1323        | -0.2703        | 0.6612         |      |
| MM058_1  | 0.0731       | 0.0464         | 0.0919      | -0.6164     | -0.5776      | 0.0769         | 0.0248         | 0.167          |      |
| MM058_2  | 0.0854       | -0.3445        | 0.1263      | -1.0787     | -0.5019      | 0.0814         | -0.5304        | 1.0895         |      |
| MM059    | 0.5127       | -0.0618        | 0.134       | -1.0174     | -0.0292      | -0.0118        | -0.9656        | 0.1707         |      |
| MM060    | 0.7657       | -0.2249        | -0.01       | -0.8266     | -0.0441      | -0.0887        | -0.0983        | -0.4831        |      |
| MM061_1  | 0.7919       | -0.0353        | -0.0096     | -0.7994     | 0.0033       | -0.0169        | 0.7339         | 0.0399         |      |
| MM061_2  | 0.8234       | -0.0222        | -0.018      | -0.8536     | -0.0215      | -0.0049        | 0.7615         | 0.0032         |      |
| MM068_1  | 0.0175       | -0.0195        | 0.0034      | -0.6616     | 0.0115       | 0.0094         | -0.0103        | 0.101          |      |
| MM068_2  | -0.0408      | -0.3739        | 0.1883      | -1.2745     | -0.0456      | -0.0929        | -0.4277        | 0.6394         |      |
| MM071    | -0.1246      | -0.319         | 0.361       | -1.3228     | -0.1877      | -0.2335        | -0.4027        | -0.0234        |      |
| MM073    | -0.142       | -0.1184        | 0.4375      | -0.1779     | -0.0937      | -0.0881        | -0.1339        | -0.8406        |      |
| MM077    | 0.686        | -0.2574        | -0.0001     | -0.9348     | 0.0046       | -0.5268        | -0.9031        | 0.0819         |      |
| MM078_2  | -0.0338      | 0.0297         | 0.4764      | -0.0714     | 0.0047       | -0.0114        | -0.061         | -0.6757        |      |
| MM080    | 0.9231       | -0.0957        | 0.0121      | -1.0474     | -0.0213      | -0.0353        | -0.0747        | 0.0704         |      |
| MM081    | 1.2053       | 0.0482         | -0.1463     | -1.0599     | -0.1569      | 0.0434         | -1.0406        | 0.3612         |      |
| MM082    | -0.2119      | -0.2364        | 0.4558      | -0.2621     | -0.1517      | -0.1663        | -1.1993        | -0.0263        |      |
| MM083_2  | -0.0138      | -0.0099        | 0.0058      | -0.102      | 0.0346       | -0.0169        | -0.0188        | 0.0583         |      |
| MM084    | -0.1386      | -0.172         | 0.374       | -1.0143     | -0.127       | 0.1812         | -0.02          | -0.1161        |      |
| MM091    | 0.0087       | -0.1797        | 0.4275      | -0.1762     | -0.1111      | -0.1207        | -0.1072        | 0.0725         |      |
| MM092    | 0.003        | -0.0364        | 0.0018      | -0.0428     | -0.0107      | -0.0208        | -0.0064        | 0.058          |      |
| MM095    | 0.2172       | -0.0063        | 0.026       | -0.0808     | -0.8423      | -0.0336        | -0.0445        | 0.121          |      |
| MM097    | 0.0339       | -0.1512        | -0.025      | -0.1676     | -0.0247      | -0.127         | -0.3138        | 0.1085         |      |
| MM098    | -0.4263      | 0.9029         | 0.0083      | 0.1294      | 0.0372       | 0.0561         | 0              | 0.8092         |      |
| MM099    | 0.5016       | 0.0199         | 0.1211      | -1.0318     | -0.3051      | -0.8589        | -0.2012        | -0.5826        |      |
| MM102    | 0.0006       | -0.0739        | -0.0119     | -0.1219     | -0.0317      | -0.0175        | -0.1071        | 0.091          |      |
| MM107    | -0.0736      | -0.096         | 0.1213      | -0.1707     | -0.0888      | -0.0683        | -0.8168        | 0.0266         |      |
| MM109    | 0.9477       | -0.0087        | -0.0021     | -0.9318     | 0.0099       | 0.0049         | -0.0356        | -0.8781        |      |
| MM111_1  | 1.186        | -0.0706        | -0.0139     | -1.0091     | -0.0633      | -0.1148        | -0.0641        | 0.0914         |      |
| MM111_2  | 0.8819       | -0.0499        | 0.0507      | -1.0777     | -0.0148      | -0.1189        | -0.1436        | 0.1493         |      |
| MM002_1  | -0.1921      | -0.0398        | 0.6646      | -0.2091     | -0.1737      | -0.1298        | -0.1944        | 0.0636         |      |
| MM002_2  | -0.1777      | -0.1203        | 0.682       | -0.2315     | -0.0963      | -0.1547        | -0.3085        | 0.0359         |      |
| MM002_3  | -0.1275      | -0.1902        | 0.7072      | -0.1933     | -0.1156      | -0.1302        | -0.2215        | 0.0453         |      |
| MM113_2  | 0.0589       | -0.1065        | 0.0556      | -0.1415     | -0.0036      | -0.0366        | -0.083         | 0.1946         |      |

**Supplementary Table S9. Aminopeptidase gene copy number variation scores from MM patient samples in the FIMM dataset ( $n = 169$ ). (15/15)**

| SampleID | <i>RNPEP</i> | <i>RNPEPL1</i> | <i>TPP1</i> | <i>TPP2</i> | <i>TRHDE</i> | <i>XPNPEP1</i> | <i>XPNPEP2</i> | <i>XPNPEP3</i> | Gene |
|----------|--------------|----------------|-------------|-------------|--------------|----------------|----------------|----------------|------|
| MM003    | 0.529        | -0.2642        | -0.2773     | -1.1437     | 0.0752       | -0.1385        | -0.0493        | 0.0366         |      |
| MM004    | 0.0077       | -0.0862        | 0.0336      | -0.1691     | -0.0484      | -0.012         | -0.0287        | 0.087          |      |
| MM117_2  | 0.4331       | -0.1525        | 0.0026      | -1.1542     | -0.08        | -0.0784        | -0.1448        | 0.2495         |      |
| MM124    | 0.5022       | -0.0952        | -0.0677     | -0.1548     | -0.0248      | -0.0593        | -0.055         | 0.1023         |      |
| MM129    | 1.4344       | -0.1834        | -0.4        | -0.7304     | -0.777       | -1.206         | 1.0153         | 0.1456         |      |
| MM130    | 0.4316       | -0.0683        | 0.0142      | -0.1539     | 0.0185       | -0.0384        | -0.1468        | 0.109          |      |
| MM005    | 0.5373       | -0.4598        | 0.0761      | -0.4567     | -0.1285      | -0.2838        | 0.032          | -0.1861        |      |
| MM135    | -0.1217      | -0.2206        | 0.0877      | 0.8774      | -0.0355      | -0.0999        | -0.1679        | 0.1131         |      |
| MM137    | 0.2678       | -0.1328        | 0.0846      | -1.2188     | -0.4668      | -0.1446        | -0.0817        | 0.1243         |      |
| MM006    | 0.9533       | -0.0406        | 0.0466      | -0.9449     | -0.8002      | 0.035          | -0.0645        | 0.15           |      |
| MM007    | 0.4829       | -0.0198        | -0.0113     | -0.943      | -0.0211      | -0.0228        | -0.018         | -0.7874        |      |
| MM008    | -0.0584      | -0.0666        | 0.0012      | -0.0878     | 0.01         | -0.0133        | -0.0715        | 0.1334         |      |
| MM009    | -0.0519      | -0.0821        | 0.2137      | -0.0219     | -0.0165      | -0.0396        | 0.0567         | -0.0497        |      |
| MM010    | -0.0295      | -0.0936        | 0.5112      | -0.1193     | -0.0694      | -0.0711        | -0.0648        | -0.0008        |      |
| MM011    | 0.493        | -0.4058        | 0.0832      | -0.9619     | 0.0184       | -0.0686        | -0.8478        | 0.2018         |      |
| MM014_4  | 0.2682       | -0.1755        | -0.1872     | -0.828      | -0.1382      | -0.1745        | -0.1172        | -0.1161        |      |
| MM014_1  | 0.2613       | -0.078         | -0.173      | -0.6301     | -0.1412      | -0.0017        | -0.158         | -0.0852        |      |
| MM014_2  | 0.3611       | -0.1372        | -0.1318     | -0.9918     | -0.143       | -0.1754        | -0.2026        | -0.029         |      |
| MM015    | -0.0031      | -0.0965        | 0.0318      | -0.1718     | -0.0283      | -0.0201        | -0.1282        | 0.2198         |      |
| MM017_1  | 0.464        | -0.1347        | -0.0685     | -0.9949     | -0.1213      | -0.1296        | -0.9724        | -0.0419        |      |
| MM019    | -0.1171      | -0.1561        | 0.6978      | -0.1712     | -0.1082      | -0.1085        | -0.1437        | 0.1704         |      |
| MM022_1  | 0.1805       | -0.0362        | -0.045      | -0.7024     | -0.0005      | -0.0255        | -0.0301        | -0.0131        |      |
| MM022_2  | 0.5948       | 0.0553         | -0.0837     | -0.9542     | -0.0164      | -0.0088        | -0.1689        | 0.0682         |      |
| MM022_3  | 0.5601       | 0.1065         | -0.0732     | -0.821      | -0.0129      | -0.0174        | -0.1866        | 0.1363         |      |
| MM023    | -0.0947      | -0.9155        | 0.4066      | -0.1217     | -0.0928      | -0.1161        | -0.139         | -0.0448        |      |
| MM024    | -0.1972      | 0.0132         | 0.436       | -0.3895     | -0.2891      | -0.2199        | 0.4446         | -0.6009        |      |
| MM025_1  | 0.0382       | -0.0344        | -0.0578     | -0.1931     | -0.1938      | -0.3766        | -0.1397        | 0.1451         |      |
| MM025_2  | -0.041       | -0.1498        | -0.1485     | -0.3501     | -0.2743      | -0.8641        | -0.2354        | 0.4144         |      |
| MM017_2  | 0.3296       | -0.1541        | -0.0755     | -0.8426     | -0.1332      | -0.1367        | -0.9351        | 0.0317         |      |

**Supplementary Table S10. Summary of live cells, and CD138+CD38+ plasma cells present in the BM-MNC samples after 72h incubation in DMSO (control) ( $n = 15$ ).**

| Sample ID | Live cells |                        | CD138+CD38+ cells |                            |
|-----------|------------|------------------------|-------------------|----------------------------|
|           | cell count | Live/Singlet cells (%) | cell count        | CD138+CD38+/Live cells (%) |
| MM007     | 9852       | 37.7                   | 349               | 3.54                       |
| MM010     | 18525      | 59.65                  | 125               | 0.68                       |
| MM012     | 17960      | 63.00                  | 2093              | 11.65                      |
| MM021     | 6489       | 30.27                  | 548               | 8.44                       |
| MM025_1   | 31431      | 73.29                  | 110               | 0.35                       |
| MM037     | 18560      | 68.36                  | 851               | 4.58                       |
| MM082     | 14337      | 46.75                  | 257               | 1.80                       |
| MM087     | 11538      | 39.75                  | 2431              | 21.07                      |
| MM106     | 24702      | 79.18                  | 223               | 0.90                       |
| MM112     | 10419      | 61.49                  | 70                | 0.68                       |
| MM124     | 5594       | 53.27                  | 559               | 10.00                      |
| MM125     | 18542      | 53.72                  | 1636              | 8.82                       |
| MM127     | 11467      | 57.93                  | 2157              | 18.81                      |
| MM128_1   | 12843      | 49.79                  | 6913              | 53.82                      |
| MM128_2   | 28045      | 50.44                  | 554               | 1.97                       |

Average number of cells in the control DMSO wells for the particular cell populations are indicated as cell counts. The fraction these cells make of all singlet cells, or of all live cells in the DMSO wells is indicated as a percentage.

BM-MNC: bone marrow mononuclear cell

**Supplementary Table S11. Melflufen, melphalan, selinexor, bortezomib, and 4-HC EC50 values from 15 MM patient sample CD138+CD38+ plasma cells with sample disease stage indicated**

| Sample ID | EC50 (nM)       |              |              |              |           | Disease stage |
|-----------|-----------------|--------------|--------------|--------------|-----------|---------------|
|           | Melflufen       | Melphalan    | Selinexor    | Bortezomib   | 4-HC      |               |
| MM007     | <b>0.001414</b> | <b>290.1</b> | <b>NA</b>    | <b>NA</b>    | <b>NA</b> | RRMM          |
| MM010     | <b>2.185</b>    | <b>53.28</b> | <b>31.30</b> | <b>NA</b>    | <b>NA</b> | RRMM          |
| MM012     | <b>0.2316</b>   | 1070         | 61.43        | 12.31        | >1E+4     | RRMM          |
| MM021     | <b>1.9e-21</b>  | <b>237.1</b> | <b>32.25</b> | <b>NA</b>    | <b>NA</b> | RRMM          |
| MM025_1   | <b>0.01096</b>  | 1638         | <b>19.68</b> | <b>NA</b>    | <b>NA</b> | RRMM          |
| MM037     | <b>0.000285</b> | <b>264.2</b> | <b>1.568</b> | <b>4.239</b> | <b>NA</b> | RRMM          |
| MM082     | <b>2.992</b>    | 1473         | <b>41.00</b> | <b>1.628</b> | <b>NA</b> | RRMM          |
| MM087     | 13.81           | 1004         | <b>21.00</b> | <b>4.645</b> | 3800      | NDMM          |
| MM106     | <b>1.655</b>    | 1939         | 64.70        | <b>NA</b>    | <b>NA</b> | NDMM          |
| MM112     | <b>0.9372</b>   | 2667         | <b>21.36</b> | <b>6.781</b> | <b>NA</b> | NDMM          |
| MM124     | <b>0.04291</b>  | <b>556</b>   | <b>39.30</b> | <b>1.227</b> | 1900      | RRMM          |
| MM125     | <b>0.8468</b>   | 3718         | 48.20        | 11.45        | <b>NA</b> | NDMM          |
| MM127     | 43.51           | 4000         | 46.70        | <b>NA</b>    | <b>NA</b> | NDMM          |
| MM128_1   | 134.5           | 14781        | <b>35.39</b> | 24.18        | >1E+4     | NDMM          |
| MM128_2   | 16.19           | 5920         | <b>NA</b>    | <b>NA</b>    | <b>NA</b> | RRMM          |
| Median    | 0.9372          | 1473         | 35.39        | 5.713        | <b>NA</b> |               |

EC50: half maximal effective concentration; MM, multiple myeloma; NDMM: newly diagnosed multiple myeloma; RRMM: relapsed/refractory multiple myeloma; 4-HC: 4-hydroperoxycyclophosphamide; NA: not available

**Supplementary Table S12. Mean log<sub>2</sub>(RPKM) values for the 39 aminopeptidase genes in melflufen high sensitivity (*n* = 5) and low sensitivity (*n* = 5) myeloma samples.**

| Aminopeptidase  | High sensitivity samples<br>( <i>n</i> =5) |                       | Low sensitivity samples<br>( <i>n</i> =5) |                       | p-value | adjusted p-<br>value |
|-----------------|--------------------------------------------|-----------------------|-------------------------------------------|-----------------------|---------|----------------------|
|                 | mean Log2<br>RPKM                          | standard<br>deviation | mean Log2<br>RPKM                         | standard<br>deviation |         |                      |
| <i>LAP3</i>     | 5.206                                      | 0.635                 | 5.605                                     | 0.710                 | 0.296   | 1                    |
| <i>ERAP2</i>    | 4.985                                      | 0.496                 | 4.990                                     | 1.170                 | 0.531   | 1                    |
| <i>METAP2</i>   | 4.309                                      | 0.347                 | 4.589                                     | 0.449                 | 0.296   | 1                    |
| <i>TPP2</i>     | 4.568                                      | 1.232                 | 4.131                                     | 0.563                 | 1       | 1                    |
| <i>ERAP1</i>    | 3.850                                      | 0.625                 | 4.188                                     | 0.238                 | 0.676   | 1                    |
| <i>DPP7</i>     | 4.079                                      | 0.762                 | 3.852                                     | 1.051                 | 1       | 1                    |
| <i>LTA4H</i>    | 3.887                                      | 0.557                 | 3.622                                     | 0.418                 | 0.403   | 1                    |
| <i>LNPEP</i>    | 3.078                                      | 0.567                 | 3.045                                     | 0.449                 | 1       | 1                    |
| <i>METAP1</i>   | 2.522                                      | 0.668                 | 2.634                                     | 0.416                 | 1       | 1                    |
| <i>XPNPEP1</i>  | 2.293                                      | 0.349                 | 2.381                                     | 0.534                 | 0.835   | 1                    |
| <i>DPP3</i>     | 2.371                                      | 0.580                 | 2.468                                     | 0.838                 | 1       | 1                    |
| <i>DPP8</i>     | 2.328                                      | 0.473                 | 2.158                                     | 0.274                 | 0.531   | 1                    |
| <i>NPEPPS</i>   | 2.070                                      | 0.365                 | 1.373                                     | 0.879                 | 0.296   | 1                    |
| <i>BLMH</i>     | 2.080                                      | 1.267                 | 2.046                                     | 0.555                 | 0.403   | 1                    |
| <i>RNPEP</i>    | 1.778                                      | 0.640                 | 1.466                                     | 1.372                 | 0.676   | 1                    |
| <i>PEPD</i>     | 1.610                                      | 0.337                 | 1.655                                     | 0.447                 | 0.676   | 1                    |
| <i>PGPEP1</i>   | 1.615                                      | 0.831                 | 1.831                                     | 0.590                 | 0.676   | 1                    |
| <i>JMJD7</i>    | 1.659                                      | 0.564                 | 1.441                                     | 0.275                 | 0.531   | 1                    |
| <i>DNPEP</i>    | 1.296                                      | 0.296                 | 1.138                                     | 0.518                 | 0.835   | 1                    |
| <i>DPP9</i>     | 0.803                                      | 0.814                 | 0.966                                     | 0.881                 | 0.676   | 1                    |
| <i>METAP1D</i>  | 0.334                                      | 0.629                 | 0.267                                     | 0.941                 | 1       | 1                    |
| <i>NPEPL1</i>   | -0.007                                     | 0.678                 | 0.132                                     | 0.519                 | 0.676   | 1                    |
| <i>TPP1</i>     | 0.190                                      | 0.934                 | -0.083                                    | 0.939                 | 0.676   | 1                    |
| <i>XPNPEP3</i>  | -0.117                                     | 0.485                 | -0.384                                    | 1.544                 | 1       | 1                    |
| <i>CTSH</i>     | 0.256                                      | 2.145                 | -0.117                                    | 1.781                 | 1       | 1                    |
| <i>RNPEPL1</i>  | -0.720                                     | 0.457                 | -0.479                                    | 1.177                 | 0.676   | 1                    |
| <i>AOPEP</i>    | -0.652                                     | 0.460                 | -0.902                                    | 0.875                 | 0.531   | 1                    |
| <i>KDM8</i>     | -1.560                                     | 0.836                 | -1.585                                    | 0.718                 | 1       | 1                    |
| <i>DPP4</i>     | -3.367                                     | 2.173                 | -4.522                                    | 1.906                 | 0.210   | 1                    |
| <i>LVRN</i>     | -4.358                                     | 1.461                 | -3.939                                    | 0.917                 | 1       | 1                    |
| <i>ENPEP</i>    | -4.768                                     | 3.525                 | -4.295                                    | 0.554                 | 0.403   | 1                    |
| <i>MMP14</i>    | -2.994                                     | 2.009                 | -4.969                                    | 1.461                 | 0.095   | 1                    |
| <i>ANPEP</i>    | -3.743                                     | 1.996                 | -6.890                                    | 2.395                 | 0.060   | 1                    |
| <i>NAALADL1</i> | -3.969                                     | 2.202                 | -4.549                                    | 2.919                 | 0.835   | 1                    |
| <i>AMZ1</i>     | -4.908                                     | 1.638                 | -5.405                                    | 1.937                 | 0.676   | 1                    |
| <i>CTSV</i>     | -7.683                                     | 2.920                 | -5.118                                    | 2.281                 | 0.144   | 1                    |
| <i>XPNPEP2</i>  | -7.876                                     | 1.809                 | -7.530                                    | 3.347                 | 1       | 1                    |
| <i>TRHDE</i>    | -8.298                                     | 2.094                 | -10.327                                   | 2.494                 | 0.210   | 1                    |
| <i>F11</i>      | -9.087                                     | 1.959                 | -7.910                                    | 3.135                 | 0.676   | 1                    |
